# Supplementary material for: Quantifying the effectiveness of shoreline armoring removal on coastal biota of Puget Sound
Source: PeerJ. 2018 Feb 23;6:e4275. doi: 10.7717/peerj.4275 (PMC5825941; doi:10.7717/peerj.4275)
Supplement: Supplemental Information 1 — Dataset of invertebrates sampled in Cornet Bay before and after shoreline armoring removal. [file peerj-06-4275-s001.xlsx]

## Sheet: RAW Taxa
Site	Arm/ Unarm	Sample Date	Meter	Taxa	Life Stage	Number
COR1	A	2012-07-01	8	Acari		115
COR1	A	2012-07-01	8	Chironomidae	larva	2
COR1	A	2012-07-01	8	Coleoptera	adult	1
COR1	A	2012-07-01	8	Collembola		87
COR1	A	2012-07-01	8	Ephydridae	larva	2
COR1	A	2012-07-01	8	Formicidae	adult	3
COR1	A	2012-07-01	8	Nematoda		1532
COR1	A	2012-07-01	8	Oligocheata		960
COR1	A	2012-07-01	17	Acari		3
COR1	A	2012-07-01	17	Collembola		26
COR1	A	2012-07-01	17	Ephydridae	larva	1
COR1	A	2012-07-01	17	Nematoda		487
COR1	A	2012-07-01	17	Oligocheata		133
COR1	A	2012-07-01	17	Talitridae	juv	1
COR1	A	2012-07-01	24	Acari		126
COR1	A	2012-07-01	24	Collembola		22
COR1	A	2012-07-01	24	Nematoda		938
COR1	A	2012-07-01	24	Oligocheata		872
COR1	A	2012-07-01	24	Staphylinidae	adult	1
COR1	A	2012-07-01	24	Talitridae	juv	1
COR1	A	2012-07-01	26	Acari		1
COR1	A	2012-07-01	26	Collembola		195
COR1	A	2012-07-01	26	Nematoda		72
COR1	A	2012-07-01	26	Oligocheata		167
COR1	A	2012-07-01	39	Acari		3
COR1	A	2012-07-01	39	Collembola		34
COR1	A	2012-07-01	39	Nematoda		206
COR1	A	2012-07-01	39	Oligocheata		126
COR1	A	2012-07-01	39	Talitridae	juv	21
COR1	A	2012-07-01	39	Traskorchestia	adult	1
COR1	U	2012-07-01	10	Acari		5
COR1	U	2012-07-01	10	Chironomidae	adult	1
COR1	U	2012-07-01	10	Coleoptera	larva	1
COR1	U	2012-07-01	10	Collembola		118
COR1	U	2012-07-01	10	Megalorchestia	adult	3
COR1	U	2012-07-01	10	Nematoda		994
COR1	U	2012-07-01	10	Oligocheata		188
COR1	U	2012-07-01	10	Talitridae	juv	17
COR1	U	2012-07-01	20	Acari		10
COR1	U	2012-07-01	20	Collembola		148
COR1	U	2012-07-01	20	Megalorchestia	adult	2
COR1	U	2012-07-01	20	Nematoda		1200
COR1	U	2012-07-01	20	Oligocheata		1040
COR1	U	2012-07-01	20	Talitridae	juv	21
COR1	U	2012-07-01	22	Acari		12
COR1	U	2012-07-01	22	Collembola		40
COR1	U	2012-07-01	22	Megalorchestia	adult	84
COR1	U	2012-07-01	22	Nematoda		2172
COR1	U	2012-07-01	22	Oligocheata		956
COR1	U	2012-07-01	22	Talitridae	juv	320
COR1	U	2012-07-01	39	Acari		19
COR1	U	2012-07-01	39	Coleoptera	larva	1
COR1	U	2012-07-01	39	Collembola		209
COR1	U	2012-07-01	39	Megalorchestia	adult	9
COR1	U	2012-07-01	39	Nematoda		1384
COR1	U	2012-07-01	39	Oligocheata		716
COR1	U	2012-07-01	39	Talitridae	juv	295
COR1	U	2012-07-01	48	Acari		22
COR1	U	2012-07-01	48	Collembola		107
COR1	U	2012-07-01	48	Megalorchestia	adult	22
COR1	U	2012-07-01	48	Nematoda		408
COR1	U	2012-07-01	48	Oligocheata		279
COR1	U	2012-07-01	48	Talitridae	juv	36
COR2	A	2013-07-08	1.5	Megalorchestia	adult	3
COR2	A	2013-07-08	1.5	Talitroidae	juv	3
COR2	A	2013-07-08	1.5	Nematoda		185
COR2	A	2013-07-08	1.5	Oligocheata		525
COR2	A	2013-07-08	1.5	Collembola		215
COR2	A	2013-07-08	1.5	Acari		3
COR2	A	2013-07-08	1.5	Coleoptera	pupa	3
COR2	A	2013-07-08	14.2	Talitroidae	juv	8
COR2	A	2013-07-08	14.2	Nematoda		51
COR2	A	2013-07-08	14.2	Oligocheata		82
COR2	A	2013-07-08	14.2	Collembola		67
COR2	A	2013-07-08	14.2	Acari		40
COR2	A	2013-07-08	22.4	Traskorchestia	adult	2
COR2	A	2013-07-08	22.4	Talitroidae	juv	1
COR2	A	2013-07-08	22.4	Nematoda		40
COR2	A	2013-07-08	22.4	Oligocheata		31
COR2	A	2013-07-08	22.4	Collembola		36
COR2	A	2013-07-08	22.4	Acari		7
COR2	A	2013-07-08	22.4	Coleoptera	pupa	14
COR2	A	2013-07-08	34.1	Traskorchestia	adult	114
COR2	A	2013-07-08	34.1	Talitroidae	juv	204
COR2	A	2013-07-08	34.1	Nematoda		50
COR2	A	2013-07-08	34.1	Oligocheata		92
COR2	A	2013-07-08	34.1	Collembola		52
COR2	A	2013-07-08	34.1	Acari		34
COR2	A	2013-07-08	34.1	Coleoptera	adult	2
COR2	A	2013-07-08	34.1	Coleoptera	pupa	20
COR2	A	2013-07-08	46.6	Megalorchestia	adult	3
COR2	A	2013-07-08	46.6	Talitroidae	juv	4
COR2	A	2013-07-08	46.6	Nematoda		9
COR2	A	2013-07-08	46.6	Oligocheata		5
COR2	A	2013-07-08	46.6	Collembola		31
COR2	A	2013-07-08	46.6	Coleoptera	pupa	2
COR2	U	2013-07-08	1.5	Megalorchestia	adult	21
COR2	U	2013-07-08	1.5	Talitroidae	juv	90
COR2	U	2013-07-08	1.5	Nematoda		146
COR2	U	2013-07-08	1.5	Oligocheata		235
COR2	U	2013-07-08	1.5	Collembola		9
COR2	U	2013-07-08	14.2	Megalorchestia	adult	13
COR2	U	2013-07-08	14.2	Talitroidae	juv	64
COR2	U	2013-07-08	14.2	Nematoda		285
COR2	U	2013-07-08	14.2	Oligocheata		328
COR2	U	2013-07-08	14.2	Collembola		7
COR2	U	2013-07-08	14.2	Acari		1
COR2	U	2013-07-08	22.4	Megalorchestia	adult	12
COR2	U	2013-07-08	22.4	Talitroidae	juv	73
COR2	U	2013-07-08	22.4	Nematoda		57
COR2	U	2013-07-08	22.4	Oligocheata		110
COR2	U	2013-07-08	22.4	Collembola		115
COR2	U	2013-07-08	22.4	Ephydridae	larva	1
COR2	U	2013-07-08	22.4	Stapholynidae	adult	1
COR2	U	2013-07-08	32.6	Megalorchestia	adult	18
COR2	U	2013-07-08	32.6	Talitroidae	juv	205
COR2	U	2013-07-08	32.6	Collembola		96
COR2	U	2013-07-08	32.6	Nematoda		116
COR2	U	2013-07-08	32.6	Oligocheata		892
COR2	U	2013-07-08	46.6	Megalorchestia	adult	11
COR2	U	2013-07-08	46.6	Talitroidae	juv	43
COR2	U	2013-07-08	46.6	Nematoda		84
COR2	U	2013-07-08	46.6	Oligocheata		415
COR2	U	2013-07-08	46.6	Collembola		375
COR2	U	2013-07-08	46.6	Acari		6
COR2	U	2013-07-08	46.6	Coleoptera	adult	1
COR2	U	2013-07-08	46.6	Stapholynidae	adult	4

## Sheet: Taxa Names
Phylum	Class	Order	Family	Taxa On Sheet	Common Name	Level on Sheet		Phylum	Class	Order	Family	Taxa On Sheet	Common Name	Level on Sheet
Annelida	Clitellata			Oligochaeta	Segmented Worms	Subclass		Annelida	Clitellata			Oligochaeta	Segmented Worms	Subclass
Arthropoda	Arachnida	Araneae		Araneae	Spider	Order		Arthropoda	Arachnida			Acari	Mite	Subclass
Arthropoda	Arachnida			Acari	Mite	Subclass				Araneae		Araneae	Spider	Order
Arthropoda	Chilopoda			Chilopoda	Centipede	Class			Chilopoda			Chilopoda	Centipede	Class
Arthropoda	Entognatha			Collembola	Springtail	Subclass			Entognatha			Collembola	Springtail	Subclass
Arthropoda	Insecta	Coleoptera	Staphylinidae	Staphylinidae	Rove Beetle	Family			Insecta	Coleoptera		Coleoptera	Beetle	Order
Arthropoda	Insecta	Coleoptera		Coleoptera	Beetle	Order				Coleoptera	Staphylinidae	Staphylinidae	Rove Beetle	Family
Arthropoda	Insecta	Diptera	Chironomidae	Chironomidae	Midge	Family				Diptera		Unknown Diptera	Fly	Order
Arthropoda	Insecta	Diptera	Ephydridae	Ephydridae	Shore Fly	Family					Chironomidae	Chironomidae	Midge	Family
Arthropoda	Insecta	Diptera	Sphaeroceridae	Sphaeroceridae	Dung Fly	Family					Ephydridae	Ephydridae	Shore Fly	Family
Arthropoda	Insecta	Diptera		Unknown Diptera	Fly	Order					Sphaeroceridae	Sphaeroceridae	Dung Fly	Family
Arthropoda	Insecta	Hymenoptera	Formicidae	Formicidae	Ant	Family				Hymenoptera		Thysanoptera	Thrips	Order
Arthropoda	Insecta	Hymenoptera	Hymenoptera	Hymenoptera	Wasps, Bees	Family					Formicidae	Formicidae	Ant	Family
Arthropoda	Insecta	Hymenoptera	Ichneumonidae	Ichneumonidae	Scorpion Wasp	Family					Hymenoptera	Hymenoptera	Wasps, Bees	Family
Arthropoda	Insecta	Thysanoptera		Thysanoptera	Thrips	Order					Ichneumonidae	Ichneumonidae	Scorpion Wasp	Family
Arthropoda	Malacostraca	Amphipoda	Caprellidae	Caprellidae	Skeleton Shrimp	Family			Malacostraca	Amphipoda	Caprellidae	Caprellidae	Skeleton Shrimp	Family
Arthropoda	Malacostraca	Amphipoda	Talitridae	Megalorchestia	Sand Fleas	Genus					Talitridae	Megalorchestia	Sand Fleas	Genus
Arthropoda	Malacostraca	Amphipoda	Talitridae	Talitridae	Sand Fleas	Family						Talitridae	Sand Fleas	Family
Arthropoda	Malacostraca	Amphipoda	Talitridae	Traskorchestia	Sand Fleas	Genus						Traskorchestia	Sand Fleas	Genus
Arthropoda	Malacostraca	Isopoda	Idoteidae	Idotea	Rockweed Isopod	Genus				Isopoda	Idoteidae	Idotea	Rockweed Isopod	Genus
Arthropoda	Malacostraca	Isopoda		Flabellifera	Isopod	Order						Flabellifera	Isopod	Order
Arthropoda	Maxillopoda	Harpacticoid		Harpacticoid	Copepod	Order			Maxillopoda	Harpacticoid		Harpacticoid	Copepod	Order
Chordata				Fish Eggs				Nematoda				Nematoda	Roundworm	Phylum
Nematoda					Roundworm	Phylum
