# Supplementary material for: Quantifying the effectiveness of shoreline armoring removal on coastal biota of Puget Sound
Source: PeerJ. 2018 Feb 23;6:e4275. doi: 10.7717/peerj.4275 (PMC5825941; doi:10.7717/peerj.4275)
Supplement: Supplemental Information 2 — Dataset of wrack cover and number of logs in Cornet Bay sampled before and after shoreline armoring removal. [file peerj-06-4275-s002.xlsx]

## Sheet: wrackData
Site	Date	Time	point on transect	total % cover	% eelgrass	% marine algae	% terrestrial	% human debris
COR1A	2012-07-01	830	8	2	0	2	0	0
COR1A	2012-07-01	830	12	3	1	2	0	0
COR1A	2012-07-01	830	17	1	0	0	1	0
COR1A	2012-07-01	830	19	1	0	1	0	0
COR1A	2012-07-01	830	24	1	0.5	0	0.5	0
COR1A	2012-07-01	830	25	1	0	0.5	0.5	0
COR1A	2012-07-01	830	26	2	1	1	0	0
COR1A	2012-07-01	830	34	1	0.5	0	0.5	0
COR1A	2012-07-01	830	39	6	1	4	1	0
COR1A	2012-07-01	830	42	1	1	0	0	0
COR1U	2012-07-01	1040	10	6	1	0	5	0
COR1U	2012-07-01	1040	15	0	0	0	0	0
COR1U	2012-07-01	1040	20	20	1	5	14	0
COR1U	2012-07-01	1040	21	62	1	17	44	0
COR1U	2012-07-01	1040	22	44	2	8	34	0
COR1U	2012-07-01	1040	24	0	0	0	0	0
COR1U	2012-07-01	1040	39	1	0	0	1	0
COR1U	2012-07-01	1040	46	0	0	0	0	0
COR1U	2012-07-01	1040	48	1	0	0	1	0
COR1U	2012-07-01	1040	49	0	0	0	0	0
COR2A	2013-07-08	911	1.5	46	8	6	32	0
COR2A	2013-07-08	911	10.5	74	10	8	56	0
COR2A	2013-07-08	911	14.2	68	12	6	50	0
COR2A	2013-07-08	911	15	98	46	24	28	0
COR2A	2013-07-08	911	22.4	30	6	16	8	0
COR2A	2013-07-08	911	25.6	31	9	10	12	0
COR2A	2013-07-08	911	34.1	58	8	16	34	0
COR2A	2013-07-08	911	36.2	16	1	14	1	0
COR2A	2013-07-08	911	46.6	78	12	6	60	0
COR2A	2013-07-08	911	48.4	47	11	3	32	1
COR2U	2013-07-08	1010	1.5	6	3	2	1	0
COR2U	2013-07-08	1010	10.5	41	2	38	1	0
COR2U	2013-07-08	1010	14.2	4	1	2	1	0
COR2U	2013-07-08	1010	15	34	4	26	4	0
COR2U	2013-07-08	1010	22.4	16	2	14	0	0
COR2U	2013-07-08	1010	25.6	15	2	12	1	0
COR2U	2013-07-08	1010	34.1	12	2	0	10	1
COR2U	2013-07-08	1010	36.2	5	2	2	0	0
COR2U	2013-07-08	1010	46.6	19	6	1	12	0
COR2U	2013-07-08	1010	48.4	15	8	3	4	0

## Sheet: logdata
Site	Date	Time	point on transect	width of log line (m)	n of large logs (> 2m)	n of small logs (< 2m)	n in contact with sediment	# with human modification	type of human modification	# with marine growth	marine spp growth	# with terrestrial growth	terrestrial spp growth	n of fallen trees	orientation of logs
COR1A	2012-07-01	830	8	1.6	1	0	1	1	rope tied	1	porphyra, green fillements	0		0	shore parallel
COR1A	2012-07-01	830	17	0	0	0	0	0		0		0		0
COR1A	2012-07-01	830	24	0	0	0	0	0		0		0		0
COR1A	2012-07-01	830	26	0	0	0	0	0		0		0		0
COR1A	2012-07-01	830	39	0	0	0	0	0		0		0		0
COR1U	2012-07-01	1040	10	3.4	2	2	4	1	former fence post	0		1	lichen, moss, ivy	3	shore parallel
COR1U	2012-07-01	1040	20	3.7	3	0	3	0		0		1	lichen, small leafy green plant
COR1U	2012-07-01	1040	22	2.5	2	2	4	1	nails	0		2	lichen, moss
COR1U	2012-07-01	1040	39	2	0	3	3	0		0		0
COR1U	2012-07-01	1040	48	3.6	0	3	3	1	cut	0		1	lichen, moss
COR2A	2013-07-08	911	1.5	12.2	4	3	7	1	cut	1	algae	0		0	parallel
COR2A	2013-07-08	911	14.2	9.6	1	1	2	1	cut	0		0
COR2A	2013-07-08	911	22.4	0.75	2	0	2	1	cut	0		1	moss
COR2A	2013-07-08	911	34.1	5.6	5	0	5	4	bound together	0		0
COR2A	2013-07-08	911	46.6	10.6	1	2	3	0		1	barncles, limpet, littorina	0
COR2U	2013-07-08	1010	1.5	3.9	1	3	4	0		0		0		1	parallel
COR2U	2013-07-08	1010	14.2	4.4	2	4	6	0		1	algae	1	moss
COR2U	2013-07-08	1010	22.4	0.75	0	4	4	0		0		0
COR2U	2013-07-08	1010	34.1	2.2	1	2	3	0		0		0
COR2U	2013-07-08	1010	46.6	8.2	3	1	4	1	cut	0		2	moss, lichen
