# Supplementary material for: Quantifying the effectiveness of shoreline armoring removal on coastal biota of Puget Sound
Source: PeerJ. 2018 Feb 23;6:e4275. doi: 10.7717/peerj.4275 (PMC5825941; doi:10.7717/peerj.4275)
Supplement: Supplemental Information 3 — Dataset of saltmarsh percentage cover and invertebrate richness from Powel Property before and after shoreline armoring removal. [file peerj-06-4275-s003.xlsx]

## Sheet: Quadrat-saltmarsh-plants
Year	2012	2012	2012	2012	2012	2012	2012	2012	2012	2012	2012	2012	2012	2012	2012	2012	2012	2012	2012	2012	2012	2013	2013	2013	2013	2013	2013	2013	2013	2013	2013	2013	2013	2013	2013	2013	2013	2013	2013	2013	2013	2013	2014	2014	2014	2014	2014	2014	2014
Profile	A	A	A	C	C	C	E	E	E	FF	FF	FF	F	F	F	H	H	H	I	I	I	A	A	A	C	C	C	E	E	E	F	F	F	H	H	H	I	I	I	FF	FF	FF	A	A	A	C	C	C	E
Elevation	10	10	10	10	10	10	10	10	10	10	10	10	10	10	10	10	10	10	10	10	10	10	10	10	10	10	10	10	10	10	10	10	10	10	10	10	10	10	10	10	10	10	10	10	10	10	10	10	10
Rep	1	2	3	1	2	3	1	2	3	1	2	3	1	2	3	1	2	3	1	2	3	1	2	3	1	2	3	1	2	3	1	2	3	1	2	3	1	2	3	1	2	3	1	2	3	1	2	3	1
Saltmarsh%	35	1	0	0	0	0	0	0	0	0	0	0	0	0	10	1	0	0	0	0	0	1	0	0	0	0	0	40	66	30	0	0	0	0	0	26	0	0	0	0	0	0	2	1	0	0	0	0	41
SaltmarshTR	1	1	0	0	0	0	0	0	0	0	0	0	0	0	1	1	0	0	0	0	0	1	0	0	0	0	0	1	2	1	0	0	0	0	0	2	0	0	0	0	0	0	1	1	0	0	0	0	2
[truncated: 98 more columns]

## Sheet: transpose
Year	Profile	Elevation	Rep	Saltmarsh%	SaltmarshTR
2012	A	10	1	35	1
2012	A	10	2	1	1
2012	A	10	3	0	0
2012	C	10	1	0	0
2012	C	10	2	0	0
2012	C	10	3	0	0
2012	E	10	1	0	0
2012	E	10	2	0	0
2012	E	10	3	0	0
2012	FF	10	1	0	0
2012	FF	10	2	0	0
2012	FF	10	3	0	0
2012	F	10	1	0	0
2012	F	10	2	0	0
2012	F	10	3	10	1
2012	H	10	1	1	1
2012	H	10	2	0	0
2012	H	10	3	0	0
2012	I	10	1	0	0
2012	I	10	2	0	0
2012	I	10	3	0	0
2013	A	10	1	1	1
2013	A	10	2	0	0
2013	A	10	3	0	0
2013	C	10	1	0	0
2013	C	10	2	0	0
2013	C	10	3	0	0
2013	E	10	1	40	1
2013	E	10	2	66	2
2013	E	10	3	30	1
2013	F	10	1	0	0
2013	F	10	2	0	0
2013	F	10	3	0	0
2013	H	10	1	0	0
2013	H	10	2	0	0
2013	H	10	3	26	2
2013	I	10	1	0	0
2013	I	10	2	0	0
2013	I	10	3	0	0
2013	FF	10	1	0	0
2013	FF	10	2	0	0
2013	FF	10	3	0	0
2014	A	10	1	2	1
2014	A	10	2	1	1
2014	A	10	3	0	0
2014	C	10	1	0	0
2014	C	10	2	0	0
2014	C	10	3	0	0
2014	E	10	1	41	2
2014	E	10	2	13	2
2014	E	10	3	1	1
2014	EQA	10	1	0	0
2014	EQA	10	2	0	0
2014	EQA	10	3	0	0
2014	F	10	1	0	0
2014	F	10	2	0	0
2014	F	10	3	0	0
2014	FF	10	1	0	0
2014	FF	10	2	0	0
2014	FF	10	3	0	0
2014	H	10	1	0	0
2014	H	10	2	1	1
2014	H	10	3	10	1
2014	I	10	1	0	0
2014	I	10	2	0	0
2014	I	10	3	0	0
2012	AA	12	1	0	0
2012	AA	12	2	0	0
2012	AA	12	3	0	0
2012	A	12	1	0	0
2012	A	12	2	0	0
2012	A	12	3	0	0
2012	B	12	1	0	0
2012	B	12	2	0	0
2012	B	12	3	0	0
2012	C	12	1	0	0
2012	C	12	2	0	0
2012	C	12	3	0	0
2012	E	12	1	98	1
2012	E	12	2	95	2
2012	E	12	3	98	1
2012	FF	12	1	0	0
2012	FF	12	2	0	0
2012	FF	12	3	0	0
2012	F	12	1	0	0
2012	F	12	2	0	0
2012	F	12	3	0	0
2012	H	12	1	0	0
2012	H	12	2	0	0
2012	H	12	3	0	0
2012	I	12	1	0	0
2012	I	12	2	0	0
2012	I	12	3	0	0
2013	A	12	1	100	2
2013	A	12	2	5	1
2013	A	12	3	0	0
2013	AA	12	1	0	0
2013	AA	12	2	0	0
2013	AA	12	3	0	0
2013	B	12	1	0	0
2013	B	12	2	0	0
2013	B	12	3	0	0
2013	C	12	1	1	1
2013	C	12	2	0	0
2013	C	12	3	0	0
2013	E	12	1	4	1
2013	E	12	2	3	1
2013	E	12	3	1	1
2013	F	12	1	55	1
2013	F	12	2	90	1
2013	F	12	3	0	0
2013	H	12	1	34	5
2013	H	12	2	1	1
2013	H	12	3	2	2
2013	I	12	1	0	0
2013	I	12	2	1	1
2013	I	12	3	1	1
2013	FF	12	1	0	0
2013	FF	12	2	0	0
2013	FF	12	3	0	0
2014	A	12	1	55	2
2014	A	12	2	3	1
2014	A	12	3	0	0
2014	AA	12	1	0	0
2014	AA	12	2	0	0
2014	AA	12	3	0	0
2014	B	12	1	0	0
2014	B	12	2	0	0
2014	B	12	3	0	0
2014	C	12	1	0	0
2014	C	12	2	0	0
2014	C	12	3	0	0
2014	E	12	1	4	1
2014	E	12	2	0	0
2014	E	12	3	0	0
2014	EQA	12	1	12	1
2014	EQA	12	2	50	1
2014	EQA	12	3	40	1
2014	F	12	1	8	2
2014	F	12	2	0	0
2014	F	12	3	0	0
2014	H	12	1	50	5
2014	H	12	2	41	4
2014	H	12	3	93	6
2014	I	12	1	4	1
2014	I	12	2	2	1
2014	I	12	3	5	1
