# Supplementary material for: Quantifying the effectiveness of shoreline armoring removal on coastal biota of Puget Sound
Source: PeerJ. 2018 Feb 23;6:e4275. doi: 10.7717/peerj.4275 (PMC5825941; doi:10.7717/peerj.4275)
Supplement: Supplemental Information 4 — Dataset of macroinvertebrates sampled in Salmon Bay Natural Area before and after armoring removal. [file peerj-06-4275-s004.xlsx]

## Sheet: 2004, 2010, 2012 Macroinverts
Site	Year	Date	Rep	Taxa	Group	Count	Density (#/m2)
Restored High	2004	2004-04-19	1	Amphipoda	Amphipoda	8	3333.33
Restored High	2004	2004-04-19	1	Chironomidae larva	Insecta larva	4	1666.67
Restored High	2004	2004-04-19	1	Harpacticus spp. A	Harpacticoida	13	5416.67
Restored High	2004	2004-04-19	1	Manayunkia speciosa	Polychaeta	1	416.667
Restored High	2004	2004-04-19	1	Manayunkia aestuarina	Polychaeta	6	2500
Restored High	2004	2004-04-19	1	Spionidae	Polychaeta	19	7916.67
Restored High	2004	2004-04-19	1	Oligochaeta	Oligochaeta	47	19583.3
Restored High	2004	2004-04-19	1	Corophiidae	Amphipoda	68	28333.3
Restored High	2004	2004-04-19	1	Gnorimosphaeroma oregonense	Isopoda	1	416.667
Restored High	2004	2004-04-19	1	Americorophium spinicorne	Amphipoda	15	6250
Restored High	2004	2004-04-19	1	Eogammarus confervicolus	Amphipoda	3	1250
Restored High	2004	2004-04-19	1	Amphipoda	Amphipoda	8	3333.33
Restored High	2004	2004-04-19	1	Nematoda	Nematoda	3	1250
Restored High	2004	2004-04-19	2	Harpacticus spp. A	Harpacticoida	7	2916.67
Restored High	2004	2004-04-19	2	Manayunkia aestuarina	Polychaeta	24	10000
Restored High	2004	2004-04-19	2	Oligochaeta	Oligochaeta	15	6250
Restored High	2004	2004-04-19	2	Spionidae	Polychaeta	5	2083.33
Restored High	2004	2004-04-19	2	Americorophium spinicorne	Amphipoda	25	10416.7
Restored High	2004	2004-04-19	2	Nematoda	Nematoda	1	416.667
Restored High	2004	2004-04-19	2	Dactylopusia spp.	Harpacticoida	1	416.667
Restored High	2004	2004-04-19	2	Corophiidae	Amphipoda	27	11250
Restored High	2004	2004-04-19	2	Eogammarus confervicolus	Amphipoda	5	2083.33
Restored High	2004	2004-04-19	3	Spionidae	Polychaeta	14	5833.33
Restored High	2004	2004-04-19	3	Corophiidae	Amphipoda	54	22500
Restored High	2004	2004-04-19	3	Monocorophium insidiosum	Amphipoda	1	416.667
Restored High	2004	2004-04-19	3	Turbellaria	Turbellaria	1	416.667
Restored High	2004	2004-04-19	3	Eogammarus confervicolus	Amphipoda	5	2083.33
Restored High	2004	2004-04-19	3	Americorophium spinicorne	Amphipoda	16	6666.67
Restored High	2004	2004-04-19	3	Harpacticus spp. A	Harpacticoida	9	3750
Restored High	2004	2004-04-19	3	Manayunkia aestuarina	Polychaeta	8	3333.33
Restored High	2004	2004-04-19	3	Oligochaeta	Oligochaeta	19	7916.67
Restored High	2004	2004-04-19	3	Nematoda	Nematoda	3	1250
Restored High	2004	2004-04-19	3	Chironomidae larva	Insecta larva	2	833.333
Restored High	2004	2004-04-19	4	Americorophium spinicorne	Amphipoda	30	12500
Restored High	2004	2004-04-19	4	Corophiidae	Amphipoda	51	21250
Restored High	2004	2004-04-19	4	Amphipoda	Amphipoda	5	2083.33
Restored High	2004	2004-04-19	4	Harpacticus spp. A	Harpacticoida	3	1250
Restored High	2004	2004-04-19	4	Chironomidae larva	Insecta larva	17	7083.33
Restored High	2004	2004-04-19	4	Chironomidae pupa	Insecta larva	1	416.667
Restored High	2004	2004-04-19	4	Manayunkia aestuarina	Polychaeta	5	2083.33
Restored High	2004	2004-04-19	4	Manayunkia speciosa	Polychaeta	1	416.667
Restored High	2004	2004-04-19	4	Spionidae	Polychaeta	9	3750
Restored High	2004	2004-04-19	4	Oligochaeta	Oligochaeta	13	5416.67
Restored High	2004	2004-04-19	4	Nematoda	Nematoda	1	416.667
Restored High	2004	2004-04-19	4	Eogammarus confervicolus	Amphipoda	2	833.333
Restored High	2004	2004-04-19	5	Nematoda	Nematoda	1	416.667
Restored High	2004	2004-04-19	5	Monocorophium insidiosum	Amphipoda	1	416.667
Restored High	2004	2004-04-19	5	Eogammarus confervicolus	Amphipoda	8	3333.33
Restored High	2004	2004-04-19	5	Americorophium spinicorne	Amphipoda	18	7500
Restored High	2004	2004-04-19	5	Corophiidae	Amphipoda	29	12083.3
Restored High	2004	2004-04-19	5	Harpacticus spp. A	Harpacticoida	9	3750
Restored High	2004	2004-04-19	5	Chironomidae larva	Insecta larva	7	2916.67
Restored High	2004	2004-04-19	5	Manayunkia aestuarina	Polychaeta	20	8333.33
Restored High	2004	2004-04-19	5	Oligochaeta	Oligochaeta	16	6666.67
Restored High	2004	2004-04-19	5	Spionidae	Polychaeta	11	4583.33
Restored High	2004	2004-04-19	6	Americorophium spinicorne	Amphipoda	12	5000
Restored High	2004	2004-04-19	6	Nematoda	Nematoda	3	1250
Restored High	2004	2004-04-19	6	Gnorimosphaeroma oregonense	Isopoda	1	416.667
Restored High	2004	2004-04-19	6	Amphipoda	Amphipoda	3	1250
Restored High	2004	2004-04-19	6	Eogammarus confervicolus	Amphipoda	3	1250
Restored High	2004	2004-04-19	6	Corophiidae	Amphipoda	29	12083.3
Restored High	2004	2004-04-19	6	Harpacticus spp. A	Harpacticoida	2	833.333
Restored High	2004	2004-04-19	6	Chironomidae larva	Insecta larva	4	1666.67
Restored High	2004	2004-04-19	6	Manayunkia aestuarina	Polychaeta	71	29583.3
Restored High	2004	2004-04-19	6	Spionidae	Polychaeta	24	10000
Restored High	2004	2004-04-19	6	Oligochaeta	Oligochaeta	18	7500
Restored High	2004	2004-04-19	7	Manayunkia aestuarina	Polychaeta	77	32083.3
Restored High	2004	2004-04-19	7	Spionidae	Polychaeta	6	2500
Restored High	2004	2004-04-19	7	Corophiidae	Amphipoda	30	12500
Restored High	2004	2004-04-19	7	Americorophium spinicorne	Amphipoda	22	9166.67
Restored High	2004	2004-04-19	7	Harpacticus spp. A	Harpacticoida	1	416.667
Restored High	2004	2004-04-19	7	Oligochaeta	Oligochaeta	16	6666.67
Restored High	2004	2004-04-19	7	Nematoda	Nematoda	2	833.333
Restored High	2004	2004-04-19	7	Eogammarus confervicolus	Amphipoda	2	833.333
Restored Low	2004	2004-04-19	1	Turbellaria	Turbellaria	4	1666.67
Restored Low	2004	2004-04-19	1	Monocorophium insidiosum	Amphipoda	3	1250
Restored Low	2004	2004-04-19	1	Amphipoda	Amphipoda	2	833.333
Restored Low	2004	2004-04-19	1	Americorophium spinicorne	Amphipoda	2	833.333
Restored Low	2004	2004-04-19	1	Corophiidae	Amphipoda	28	11666.7
Restored Low	2004	2004-04-19	1	Cumella vulgaris	Cumacea	26	10833.3
Restored Low	2004	2004-04-19	1	Oligochaeta	Oligochaeta	25	10416.7
Restored Low	2004	2004-04-19	1	Nematoda	Nematoda	3	1250
Restored Low	2004	2004-04-19	2	Spionidae	Polychaeta	1	416.667
Restored Low	2004	2004-04-19	2	Oligochaeta	Oligochaeta	17	7083.33
Restored Low	2004	2004-04-19	2	Cumella vulgaris	Cumacea	21	8750
Restored Low	2004	2004-04-19	2	Corophiidae	Amphipoda	44	18333.3
Restored Low	2004	2004-04-19	2	Amphipoda	Amphipoda	3	1250
Restored Low	2004	2004-04-19	2	Eogammarus confervicolus	Amphipoda	2	833.333
Restored Low	2004	2004-04-19	2	Turbellaria	Turbellaria	8	3333.33
Restored Low	2004	2004-04-19	2	Americorophium salmonis	Amphipoda	2	833.333
Restored Low	2004	2004-04-19	2	Nematoda	Nematoda	3	1250
Restored Low	2004	2004-04-19	2	Americorophium spinicorne	Amphipoda	4	1666.67
Restored Low	2004	2004-04-19	3	Americorophium spinicorne	Amphipoda	8	3333.33
Restored Low	2004	2004-04-19	3	Oligochaeta	Oligochaeta	4	1666.67
Restored Low	2004	2004-04-19	3	Cumella vulgaris	Cumacea	11	4583.33
Restored Low	2004	2004-04-19	3	Americorophium salmonis	Amphipoda	2	833.333
Restored Low	2004	2004-04-19	3	Corophiidae	Amphipoda	25	10416.7
Restored Low	2004	2004-04-19	3	Amphipoda	Amphipoda	1	416.667
Restored Low	2004	2004-04-19	3	Eogammarus confervicolus	Amphipoda	1	416.667
Restored Low	2004	2004-04-19	3	Turbellaria	Turbellaria	4	1666.67
Restored Low	2004	2004-04-19	3	Nematoda	Nematoda	4	1666.67
Restored Low	2004	2004-04-19	3	Monocorophium insidiosum	Amphipoda	2	833.333
Restored Low	2004	2004-04-19	4	Americorophium spinicorne	Amphipoda	4	1666.67
Restored Low	2004	2004-04-19	4	Nematoda	Nematoda	4	1666.67
Restored Low	2004	2004-04-19	4	Oligochaeta	Oligochaeta	23	9583.33
Restored Low	2004	2004-04-19	4	Cumella vulgaris	Cumacea	12	5000
Restored Low	2004	2004-04-19	4	Americorophium salmonis	Amphipoda	2	833.333
Restored Low	2004	2004-04-19	4	Corophiidae	Amphipoda	28	11666.7
Restored Low	2004	2004-04-19	4	Eogammarus confervicolus	Amphipoda	1	416.667
Restored Low	2004	2004-04-19	4	Turbellaria	Turbellaria	2	833.333
Restored Low	2004	2004-04-19	4	Goniadidae	Polychaeta	1	416.667
Restored Low	2004	2004-04-19	4	Manayunkia aestuarina	Polychaeta	2	833.333
Restored Low	2004	2004-04-19	4	Amphipoda	Amphipoda	1	416.667
Restored Low	2004	2004-04-19	5	Cumella vulgaris	Cumacea	16	6666.67
Restored Low	2004	2004-04-19	5	Oligochaeta	Oligochaeta	5	2083.33
Restored Low	2004	2004-04-19	5	Americorophium salmonis	Amphipoda	5	2083.33
Restored Low	2004	2004-04-19	5	Monocorophium insidiosum	Amphipoda	2	833.333
Restored Low	2004	2004-04-19	5	Americorophium spinicorne	Amphipoda	6	2500
Restored Low	2004	2004-04-19	5	Turbellaria	Turbellaria	4	1666.67
Restored Low	2004	2004-04-19	5	Nematoda	Nematoda	24	10000
Restored Low	2004	2004-04-19	5	Corophiidae	Amphipoda	22	9166.67
Restored Low	2004	2004-04-19	6	Corophiidae	Amphipoda	23	9583.33
Restored Low	2004	2004-04-19	6	Nematoda	Nematoda	24	10000
Restored Low	2004	2004-04-19	6	Oligochaeta	Oligochaeta	6	2500
Restored Low	2004	2004-04-19	6	Americorophium salmonis	Amphipoda	2	833.333
Restored Low	2004	2004-04-19	6	Turbellaria	Turbellaria	2	833.333
Restored Low	2004	2004-04-19	6	Nereididae	Polychaeta	1	416.667
Restored Low	2004	2004-04-19	6	Cumella vulgaris	Cumacea	4	1666.67
Restored Low	2004	2004-04-19	7	Monocorophium insidiosum	Amphipoda	3	1250
Restored Low	2004	2004-04-19	7	Oligochaeta	Oligochaeta	4	1666.67
Restored Low	2004	2004-04-19	7	Nematoda	Nematoda	25	10416.7
Restored Low	2004	2004-04-19	7	Cumella vulgaris	Cumacea	26	10833.3
Restored Low	2004	2004-04-19	7	Americorophium salmonis	Amphipoda	6	2500
Restored Low	2004	2004-04-19	7	Turbellaria	Turbellaria	3	1250
Restored Low	2004	2004-04-19	7	Goniadidae	Polychaeta	1	416.667
Restored Low	2004	2004-04-19	7	Corophiidae	Amphipoda	24	10000
Restored Low	2004	2004-04-19	7	Bivalvia	Bivalvia	1	416.667
Reference High	2004	2004-04-19	1	Spionidae	Polychaeta	8	3333.33
Reference High	2004	2004-04-19	1	Harpacticus spp. A	Harpacticoida	3	1250
Reference High	2004	2004-04-19	1	Nematoda	Nematoda	28	11666.7
Reference High	2004	2004-04-19	1	Oligochaeta	Oligochaeta	96	40000
Reference High	2004	2004-04-19	1	Polychaeta	Polychaeta	3	1250
Reference High	2004	2004-04-19	1	Corophiidae	Amphipoda	45	18750
Reference High	2004	2004-04-19	1	Americorophium spinicorne	Amphipoda	27	11250
Reference High	2004	2004-04-19	1	Eogammarus confervicolus	Amphipoda	21	8750
Reference High	2004	2004-04-19	1	Amphipoda	Amphipoda	11	4583.33
Reference High	2004	2004-04-19	2	Sinelobus stanfordi	Tanaidacea	1	416.667
Reference High	2004	2004-04-19	2	Laophontidae	Harpacticoida	2	833.333
Reference High	2004	2004-04-19	2	Phyllodocidae	Polychaeta	1	416.667
Reference High	2004	2004-04-19	2	Chironomidae larva	Insecta larva	25	10416.7
Reference High	2004	2004-04-19	2	Chironomidae pupa	Insecta larva	1	416.667
Reference High	2004	2004-04-19	2	Harpacticus spp. A	Harpacticoida	9	3750
Reference High	2004	2004-04-19	2	Gnorimosphaeroma oregonense	Isopoda	1	416.667
Reference High	2004	2004-04-19	2	Spionidae	Polychaeta	18	7500
Reference High	2004	2004-04-19	2	Nematoda	Nematoda	18	7500
Reference High	2004	2004-04-19	2	Eogammarus confervicolus	Amphipoda	26	10833.3
Reference High	2004	2004-04-19	2	Amphipoda	Amphipoda	6	2500
Reference High	2004	2004-04-19	2	Americorophium spinicorne	Amphipoda	56	23333.3
Reference High	2004	2004-04-19	2	Corophiidae	Amphipoda	75	31250
Reference High	2004	2004-04-19	2	Oligochaeta	Oligochaeta	126	52500
Reference High	2004	2004-04-19	3	Chironomidae larva	Insecta larva	8	3333.33
Reference High	2004	2004-04-19	3	Eogammarus confervicolus	Amphipoda	42	17500
Reference High	2004	2004-04-19	3	Amphipoda	Amphipoda	9	3750
Reference High	2004	2004-04-19	3	Americorophium spinicorne	Amphipoda	20	8333.33
Reference High	2004	2004-04-19	3	Oligochaeta	Oligochaeta	60	25000
Reference High	2004	2004-04-19	3	Nematoda	Nematoda	10	4166.67
Reference High	2004	2004-04-19	3	Huntemannia jadensis	Harpacticoida	1	416.667
Reference High	2004	2004-04-19	3	Spionidae	Polychaeta	4	1666.67
Reference High	2004	2004-04-19	3	Corophiidae	Amphipoda	51	21250
Reference High	2004	2004-04-19	4	Nematoda	Nematoda	35	14583.3
Reference High	2004	2004-04-19	4	Eogammarus confervicolus	Amphipoda	11	4583.33
Reference High	2004	2004-04-19	4	Americorophium spinicorne	Amphipoda	7	2916.67
Reference High	2004	2004-04-19	4	Phyllodocidae	Polychaeta	1	416.667
Reference High	2004	2004-04-19	4	Harpacticus spp. A	Harpacticoida	15	6250
Reference High	2004	2004-04-19	4	Corophiidae	Amphipoda	11	4583.33
Reference High	2004	2004-04-19	4	Amphipoda	Amphipoda	1	416.667
Reference High	2004	2004-04-19	4	Chironomidae larva	Insecta larva	1	416.667
Reference High	2004	2004-04-19	4	Spionidae	Polychaeta	66	27500
Reference High	2004	2004-04-19	4	Oligochaeta	Oligochaeta	39	16250
Reference High	2004	2004-04-19	5	Oligochaeta	Oligochaeta	18	7500
Reference High	2004	2004-04-19	5	Phyllodocidae	Polychaeta	1	416.667
Reference High	2004	2004-04-19	5	Huntemannia jadensis	Harpacticoida	1	416.667
Reference High	2004	2004-04-19	5	Nematoda	Nematoda	66	27500
Reference High	2004	2004-04-19	5	Monocorophium insidiosum	Amphipoda	2	833.333
Reference High	2004	2004-04-19	5	Chironomidae larva	Insecta larva	1	416.667
Reference High	2004	2004-04-19	5	Harpacticus spp. A	Harpacticoida	2	833.333
Reference High	2004	2004-04-19	5	Corophiidae	Amphipoda	4	1666.67
Reference High	2004	2004-04-19	5	Americorophium spinicorne	Amphipoda	1	416.667
Reference High	2004	2004-04-19	5	Amphipoda	Amphipoda	1	416.667
Reference High	2004	2004-04-19	5	Eogammarus confervicolus	Amphipoda	2	833.333
Reference High	2004	2004-04-19	5	Spionidae	Polychaeta	25	10416.7
Reference High	2004	2004-04-19	5	Ampithoe spp.	Amphipoda	2	833.333
Reference High	2004	2004-04-19	6	Insecta pupa	Insecta larva	1	416.667
Reference High	2004	2004-04-19	6	Amphipoda	Amphipoda	1	416.667
Reference High	2004	2004-04-19	6	Phyllodocidae	Polychaeta	1	416.667
Reference High	2004	2004-04-19	6	Monocorophium insidiosum	Amphipoda	8	3333.33
Reference High	2004	2004-04-19	6	Ampithoe spp.	Amphipoda	1	416.667
Reference High	2004	2004-04-19	6	Eogammarus confervicolus	Amphipoda	1	416.667
Reference High	2004	2004-04-19	6	Americorophium spinicorne	Amphipoda	2	833.333
Reference High	2004	2004-04-19	6	Corophiidae	Amphipoda	6	2500
Reference High	2004	2004-04-19	6	Harpacticus spp. A	Harpacticoida	12	5000
Reference High	2004	2004-04-19	6	Spionidae	Polychaeta	31	12916.7
Reference High	2004	2004-04-19	6	Nematoda	Nematoda	83	34583.3
Reference High	2004	2004-04-19	6	Oligochaeta	Oligochaeta	15	6250
Reference High	2004	2004-04-19	7	Chironomidae larva	Insecta larva	5	2083.33
Reference High	2004	2004-04-19	7	Gnorimosphaeroma oregonense	Isopoda	1	416.667
Reference High	2004	2004-04-19	7	Phyllodocidae	Polychaeta	2	833.333
Reference High	2004	2004-04-19	7	Monocorophium insidiosum	Amphipoda	8	3333.33
Reference High	2004	2004-04-19	7	Harpacticus spp. A	Harpacticoida	14	5833.33
Reference High	2004	2004-04-19	7	Oligochaeta	Oligochaeta	11	4583.33
Reference High	2004	2004-04-19	7	Spionidae	Polychaeta	32	13333.3
Reference High	2004	2004-04-19	7	Nematoda	Nematoda	86	35833.3
Reference High	2004	2004-04-19	7	Corophiidae	Amphipoda	11	4583.33
Reference Low	2004	2004-04-19	1	Eogammarus confervicolus	Amphipoda	3	1250
Reference Low	2004	2004-04-19	1	Oligochaeta	Oligochaeta	158	65833.3
Reference Low	2004	2004-04-19	1	Turbellaria	Turbellaria	7	2916.67
Reference Low	2004	2004-04-19	1	Cumella vulgaris	Cumacea	11	4583.33
Reference Low	2004	2004-04-19	1	Phyllodocidae	Polychaeta	3	1250
Reference Low	2004	2004-04-19	1	Nematoda	Nematoda	4	1666.67
Reference Low	2004	2004-04-19	1	Americorophium salmonis	Amphipoda	9	3750
Reference Low	2004	2004-04-19	1	Anthozoa	Anthozoa	1	416.667
Reference Low	2004	2004-04-19	1	Spionidae	Polychaeta	1	416.667
Reference Low	2004	2004-04-19	1	Nereididae	Polychaeta	1	416.667
Reference Low	2004	2004-04-19	1	Corophiidae	Amphipoda	12	5000
Reference Low	2004	2004-04-19	2	Phyllodocidae	Polychaeta	2	833.333
Reference Low	2004	2004-04-19	2	Nematoda	Nematoda	7	2916.67
Reference Low	2004	2004-04-19	2	Oligochaeta	Oligochaeta	47	19583.3
Reference Low	2004	2004-04-19	2	Turbellaria	Turbellaria	18	7500
Reference Low	2004	2004-04-19	2	Cumella vulgaris	Cumacea	28	11666.7
Reference Low	2004	2004-04-19	2	Corophiidae	Amphipoda	8	3333.33
Reference Low	2004	2004-04-19	2	Eogammarus confervicolus	Amphipoda	9	3750
Reference Low	2004	2004-04-19	2	Americorophium salmonis	Amphipoda	7	2916.67
Reference Low	2004	2004-04-19	2	Ampithoe spp.	Amphipoda	2	833.333
Reference Low	2004	2004-04-19	2	Goniadidae	Polychaeta	1	416.667
Reference Low	2004	2004-04-19	2	Sinelobus stanfordi	Tanaidacea	2	833.333
Reference Low	2004	2004-04-19	2	Chironomidae larva	Insecta larva	1	416.667
Reference Low	2004	2004-04-19	3	Phyllodocidae	Polychaeta	1	416.667
Reference Low	2004	2004-04-19	3	Oligochaeta	Oligochaeta	38	15833.3
Reference Low	2004	2004-04-19	3	Turbellaria	Turbellaria	12	5000
Reference Low	2004	2004-04-19	3	Nematoda	Nematoda	1	416.667
Reference Low	2004	2004-04-19	3	Corophiidae	Amphipoda	9	3750
Reference Low	2004	2004-04-19	3	Americorophium salmonis	Amphipoda	9	3750
Reference Low	2004	2004-04-19	3	Nereididae	Polychaeta	1	416.667
Reference Low	2004	2004-04-19	3	Goniadidae	Polychaeta	1	416.667
Reference Low	2004	2004-04-19	3	Chironomidae pupa	Insecta larva	1	416.667
Reference Low	2004	2004-04-19	3	Cumella vulgaris	Cumacea	13	5416.67
Reference Low	2004	2004-04-19	3	Eogammarus confervicolus	Amphipoda	4	1666.67
Reference Low	2004	2004-04-19	4	Eogammarus confervicolus	Amphipoda	2	833.333
Reference Low	2004	2004-04-19	4	Nematoda	Nematoda	2	833.333
Reference Low	2004	2004-04-19	4	Oligochaeta	Oligochaeta	18	7500
Reference Low	2004	2004-04-19	4	Turbellaria	Turbellaria	16	6666.67
Reference Low	2004	2004-04-19	4	Corophiidae	Amphipoda	33	13750
Reference Low	2004	2004-04-19	4	Americorophium salmonis	Amphipoda	11	4583.33
Reference Low	2004	2004-04-19	4	Capitellidae	Polychaeta	1	416.667
Reference Low	2004	2004-04-19	4	Chironomidae larva	Insecta larva	2	833.333
Reference Low	2004	2004-04-19	4	Cumella vulgaris	Cumacea	10	4166.67
Reference Low	2004	2004-04-19	5	Anthozoa	Anthozoa	1	416.667
Reference Low	2004	2004-04-19	5	Eogammarus confervicolus	Amphipoda	1	416.667
Reference Low	2004	2004-04-19	5	Turbellaria	Turbellaria	12	5000
Reference Low	2004	2004-04-19	5	Oligochaeta	Oligochaeta	21	8750
Reference Low	2004	2004-04-19	5	Cumella vulgaris	Cumacea	8	3333.33
Reference Low	2004	2004-04-19	5	Nematoda	Nematoda	3	1250
Reference Low	2004	2004-04-19	5	Corophiidae	Amphipoda	27	11250
Reference Low	2004	2004-04-19	5	Americorophium salmonis	Amphipoda	8	3333.33
Reference Low	2004	2004-04-19	5	Goniadidae	Polychaeta	1	416.667
Reference Low	2004	2004-04-19	5	Monocorophium insidiosum	Amphipoda	1	416.667
Reference Low	2004	2004-04-19	5	Chironomidae larva	Insecta larva	1	416.667
Reference Low	2004	2004-04-19	5	Phyllodocidae	Polychaeta	2	833.333
Reference Low	2004	2004-04-19	6	Chironomidae larva	Insecta larva	1	416.667
Reference Low	2004	2004-04-19	6	Spionidae	Polychaeta	1	416.667
Reference Low	2004	2004-04-19	6	Americorophium salmonis	Amphipoda	7	2916.67
Reference Low	2004	2004-04-19	6	Corophiidae	Amphipoda	21	8750
Reference Low	2004	2004-04-19	6	Phyllodocidae	Polychaeta	1	416.667
Reference Low	2004	2004-04-19	6	Eogammarus confervicolus	Amphipoda	5	2083.33
Reference Low	2004	2004-04-19	6	Cumella vulgaris	Cumacea	20	8333.33
Reference Low	2004	2004-04-19	6	Turbellaria	Turbellaria	15	6250
Reference Low	2004	2004-04-19	6	Nematoda	Nematoda	2	833.333
Reference Low	2004	2004-04-19	6	Oligochaeta	Oligochaeta	29	12083.3
Reference Low	2004	2004-04-19	7	Turbellaria	Turbellaria	13	5416.67
Reference Low	2004	2004-04-19	7	Nereididae	Polychaeta	1	416.667
Reference Low	2004	2004-04-19	7	Monocorophium insidiosum	Amphipoda	2	833.333
Reference Low	2004	2004-04-19	7	Cumella vulgaris	Cumacea	15	6250
Reference Low	2004	2004-04-19	7	Anthozoa	Anthozoa	2	833.333
Reference Low	2004	2004-04-19	7	Nematoda	Nematoda	2	833.333
Reference Low	2004	2004-04-19	7	Oligochaeta	Oligochaeta	19	7916.67
Reference Low	2004	2004-04-19	7	Corophiidae	Amphipoda	12	5000
Reference Low	2004	2004-04-19	7	Americorophium salmonis	Amphipoda	9	3750
Reference Low	2004	2004-04-19	7	Chironomidae larva	Insecta larva	1	416.667
Reference Low	2004	2004-04-19	7	Sinelobus stanfordi	Tanaidacea	1	416.667
Reference Low	2004	2004-04-19	7	Eogammarus confervicolus	Amphipoda	4	1666.67
Restored High	2004	2004-05-24	1	Eogammarus confervicolus	Amphipoda	2	833.333
Restored High	2004	2004-05-24	1	Oligochaeta	Oligochaeta	40	16666.7
Restored High	2004	2004-05-24	1	Corophiidae	Amphipoda	37	15416.7
Restored High	2004	2004-05-24	1	Americorophium spinicorne	Amphipoda	22	9166.67
Restored High	2004	2004-05-24	1	Harpacticus spp. A	Harpacticoida	2	833.333
Restored High	2004	2004-05-24	1	Chironomidae larva	Insecta larva	6	2500
Restored High	2004	2004-05-24	1	Chironomidae pupa	Insecta larva	1	416.667
Restored High	2004	2004-05-24	1	Manayunkia aestuarina	Polychaeta	6	2500
Restored High	2004	2004-05-24	1	Spionidae	Polychaeta	19	7916.67
Restored High	2004	2004-05-24	2	Nematoda	Nematoda	1	416.667
Restored High	2004	2004-05-24	2	Oligochaeta	Oligochaeta	43	17916.7
Restored High	2004	2004-05-24	2	Turbellaria	Turbellaria	1	416.667
Restored High	2004	2004-05-24	2	Eogammarus confervicolus	Amphipoda	12	5000
Restored High	2004	2004-05-24	2	Americorophium spinicorne	Amphipoda	32	13333.3
Restored High	2004	2004-05-24	2	Corophiidae	Amphipoda	36	15000
Restored High	2004	2004-05-24	2	Harpacticus spp. A	Harpacticoida	2	833.333
Restored High	2004	2004-05-24	2	Chironomidae larva	Insecta larva	5	2083.33
Restored High	2004	2004-05-24	2	Manayunkia aestuarina	Polychaeta	13	5416.67
Restored High	2004	2004-05-24	2	Spionidae	Polychaeta	9	3750
Restored High	2004	2004-05-24	3	Americorophium spinicorne	Amphipoda	15	6250
Restored High	2004	2004-05-24	3	Corophiidae	Amphipoda	41	17083.3
Restored High	2004	2004-05-24	3	Harpacticus spp. A	Harpacticoida	1	416.667
Restored High	2004	2004-05-24	3	Manayunkia aestuarina	Polychaeta	2	833.333
Restored High	2004	2004-05-24	3	Spionidae	Polychaeta	15	6250
Restored High	2004	2004-05-24	3	Oligochaeta	Oligochaeta	43	17916.7
Restored High	2004	2004-05-24	3	Nematoda	Nematoda	2	833.333
Restored High	2004	2004-05-24	3	Eogammarus confervicolus	Amphipoda	9	3750
Restored High	2004	2004-05-24	4	Chironomidae larva	Insecta larva	2	833.333
Restored High	2004	2004-05-24	4	Nematoda	Nematoda	1	416.667
Restored High	2004	2004-05-24	4	Oligochaeta	Oligochaeta	52	21666.7
Restored High	2004	2004-05-24	4	Spionidae	Polychaeta	11	4583.33
Restored High	2004	2004-05-24	4	Manayunkia aestuarina	Polychaeta	10	4166.67
Restored High	2004	2004-05-24	4	Corophiidae	Amphipoda	38	15833.3
Restored High	2004	2004-05-24	4	Americorophium spinicorne	Amphipoda	33	13750
Restored High	2004	2004-05-24	4	Eogammarus confervicolus	Amphipoda	13	5416.67
Restored High	2004	2004-05-24	4	Turbellaria	Turbellaria	1	416.667
Restored High	2004	2004-05-24	4	Harpacticus spp. A	Harpacticoida	2	833.333
Restored High	2004	2004-05-24	5	Nematoda	Nematoda	5	2083.33
Restored High	2004	2004-05-24	5	Corophiidae	Amphipoda	56	23333.3
Restored High	2004	2004-05-24	5	Americorophium spinicorne	Amphipoda	20	8333.33
Restored High	2004	2004-05-24	5	Chironomidae larva	Insecta larva	6	2500
Restored High	2004	2004-05-24	5	Manayunkia aestuarina	Polychaeta	7	2916.67
Restored High	2004	2004-05-24	5	Harpacticus spp. A	Harpacticoida	1	416.667
Restored High	2004	2004-05-24	5	Oligochaeta	Oligochaeta	28	11666.7
Restored High	2004	2004-05-24	5	Spionidae	Polychaeta	17	7083.33
Restored High	2004	2004-05-24	6	Spionidae	Polychaeta	19	7916.67
Restored High	2004	2004-05-24	6	Harpacticus spp. A	Harpacticoida	2	833.333
Restored High	2004	2004-05-24	6	Nematoda	Nematoda	4	1666.67
Restored High	2004	2004-05-24	6	Oligochaeta	Oligochaeta	39	16250
Restored High	2004	2004-05-24	6	Laophontidae	Harpacticoida	1	416.667
Restored High	2004	2004-05-24	6	Chironomidae larva	Insecta larva	5	2083.33
Restored High	2004	2004-05-24	6	Turbellaria	Turbellaria	1	416.667
Restored High	2004	2004-05-24	6	Americorophium spinicorne	Amphipoda	28	11666.7
Restored High	2004	2004-05-24	6	Manayunkia aestuarina	Polychaeta	3	1250
Restored High	2004	2004-05-24	6	Corophiidae	Amphipoda	46	19166.7
Restored High	2004	2004-05-24	7	Harpacticus spp. A	Harpacticoida	4	1666.67
Restored High	2004	2004-05-24	7	Oligochaeta	Oligochaeta	50	20833.3
Restored High	2004	2004-05-24	7	Spionidae	Polychaeta	11	4583.33
Restored High	2004	2004-05-24	7	Chironomidae larva	Insecta larva	12	5000
Restored High	2004	2004-05-24	7	Nematoda	Nematoda	1	416.667
Restored High	2004	2004-05-24	7	Corophiidae	Amphipoda	47	19583.3
Restored High	2004	2004-05-24	7	Americorophium spinicorne	Amphipoda	15	6250
Restored High	2004	2004-05-24	7	Eogammarus confervicolus	Amphipoda	3	1250
Restored High	2004	2004-05-24	7	Turbellaria	Turbellaria	1	416.667
Restored High	2004	2004-05-24	7	Dolichopodidae larva	Insecta larva	2	833.333
Restored High	2004	2004-05-24	7	Manayunkia aestuarina	Polychaeta	3	1250
Restored Low	2004	2004-05-24	1	Macoma spp.	Bivalvia	1	416.667
Restored Low	2004	2004-05-24	1	Anthozoa	Anthozoa	2	833.333
Restored Low	2004	2004-05-24	1	Anthozoa	Anthozoa	1	416.667
Restored Low	2004	2004-05-24	1	Nereididae	Polychaeta	1	416.667
Restored Low	2004	2004-05-24	1	Capitellidae	Polychaeta	1	416.667
Restored Low	2004	2004-05-24	1	Eogammarus confervicolus	Amphipoda	7	2916.67
Restored Low	2004	2004-05-24	1	Corophiidae	Amphipoda	10	4166.67
Restored Low	2004	2004-05-24	1	Monocorophium insidiosum	Amphipoda	2	833.333
Restored Low	2004	2004-05-24	1	Americorophium salmonis	Amphipoda	9	3750
Restored Low	2004	2004-05-24	1	Oligochaeta	Oligochaeta	20	8333.33
Restored Low	2004	2004-05-24	1	Nematoda	Nematoda	5	2083.33
Restored Low	2004	2004-05-24	1	Cumella vulgaris	Cumacea	18	7500
Restored Low	2004	2004-05-24	2	Spionidae	Polychaeta	1	416.667
Restored Low	2004	2004-05-24	2	Cancer magister	Decapoda	1	416.667
Restored Low	2004	2004-05-24	2	Eogammarus confervicolus	Amphipoda	4	1666.67
Restored Low	2004	2004-05-24	2	Corophiidae	Amphipoda	17	7083.33
Restored Low	2004	2004-05-24	2	Americorophium salmonis	Amphipoda	4	1666.67
Restored Low	2004	2004-05-24	2	Goniadidae	Polychaeta	1	416.667
Restored Low	2004	2004-05-24	2	Phyllodocidae	Polychaeta	1	416.667
Restored Low	2004	2004-05-24	2	Oligochaeta	Oligochaeta	7	2916.67
Restored Low	2004	2004-05-24	2	Nematoda	Nematoda	4	1666.67
Restored Low	2004	2004-05-24	2	Cumella vulgaris	Cumacea	15	6250
Restored Low	2004	2004-05-24	3	Nematoda	Nematoda	2	833.333
Restored Low	2004	2004-05-24	3	Capitellidae	Polychaeta	4	1666.67
Restored Low	2004	2004-05-24	3	Corophiidae	Amphipoda	35	14583.3
Restored Low	2004	2004-05-24	3	Monocorophium insidiosum	Amphipoda	2	833.333
Restored Low	2004	2004-05-24	3	Americorophium salmonis	Amphipoda	5	2083.33
Restored Low	2004	2004-05-24	3	Oligochaeta	Oligochaeta	15	6250
Restored Low	2004	2004-05-24	3	Eogammarus confervicolus	Amphipoda	3	1250
Restored Low	2004	2004-05-24	3	Cumella vulgaris	Cumacea	7	2916.67
Restored Low	2004	2004-05-24	4	Oligochaeta	Oligochaeta	33	13750
Restored Low	2004	2004-05-24	4	Cumella vulgaris	Cumacea	12	5000
Restored Low	2004	2004-05-24	4	Monocorophium insidiosum	Amphipoda	3	1250
Restored Low	2004	2004-05-24	4	Americorophium spinicorne	Amphipoda	1	416.667
Restored Low	2004	2004-05-24	4	Eogammarus confervicolus	Amphipoda	2	833.333
Restored Low	2004	2004-05-24	4	Turbellaria	Turbellaria	1	416.667
Restored Low	2004	2004-05-24	4	Capitellidae	Polychaeta	1	416.667
Restored Low	2004	2004-05-24	4	Corophiidae	Amphipoda	30	12500
Restored Low	2004	2004-05-24	4	Nematoda	Nematoda	5	2083.33
Restored Low	2004	2004-05-24	4	Americorophium salmonis	Amphipoda	7	2916.67
Restored Low	2004	2004-05-24	5	Gnorimosphaeroma oregonense	Isopoda	1	416.667
Restored Low	2004	2004-05-24	5	Goniadidae	Polychaeta	1	416.667
Restored Low	2004	2004-05-24	5	Anthozoa	Anthozoa	1	416.667
Restored Low	2004	2004-05-24	5	Americorophium spinicorne	Amphipoda	2	833.333
Restored Low	2004	2004-05-24	5	Corophiidae	Amphipoda	64	26666.7
Restored Low	2004	2004-05-24	5	Cumella vulgaris	Cumacea	6	2500
Restored Low	2004	2004-05-24	5	Oligochaeta	Oligochaeta	45	18750
Restored Low	2004	2004-05-24	5	Nematoda	Nematoda	8	3333.33
Restored Low	2004	2004-05-24	5	Eogammarus confervicolus	Amphipoda	3	1250
Restored Low	2004	2004-05-24	6	Mya arenaria	Bivalvia	1	416.667
Restored Low	2004	2004-05-24	6	Capitellidae	Polychaeta	1	416.667
Restored Low	2004	2004-05-24	6	Oligochaeta	Oligochaeta	13	5416.67
Restored Low	2004	2004-05-24	6	Turbellaria	Turbellaria	1	416.667
Restored Low	2004	2004-05-24	6	Eogammarus confervicolus	Amphipoda	1	416.667
Restored Low	2004	2004-05-24	6	Corophiidae	Amphipoda	22	9166.67
Restored Low	2004	2004-05-24	6	Monocorophium insidiosum	Amphipoda	1	416.667
Restored Low	2004	2004-05-24	6	Americorophium salmonis	Amphipoda	1	416.667
Restored Low	2004	2004-05-24	6	Cumella vulgaris	Cumacea	9	3750
Restored Low	2004	2004-05-24	6	Nematoda	Nematoda	1	416.667
Restored Low	2004	2004-05-24	6	Anthozoa	Anthozoa	1	416.667
Restored Low	2004	2004-05-24	7	Goniadidae	Polychaeta	1	416.667
Restored Low	2004	2004-05-24	7	Phyllodocidae	Polychaeta	1	416.667
Restored Low	2004	2004-05-24	7	Polychaeta	Polychaeta	1	416.667
Restored Low	2004	2004-05-24	7	Oligochaeta	Oligochaeta	3	1250
Restored Low	2004	2004-05-24	7	Eogammarus confervicolus	Amphipoda	2	833.333
Restored Low	2004	2004-05-24	7	Corophiidae	Amphipoda	29	12083.3
Restored Low	2004	2004-05-24	7	Americorophium salmonis	Amphipoda	4	1666.67
Restored Low	2004	2004-05-24	7	Nereididae	Polychaeta	1	416.667
Restored Low	2004	2004-05-24	7	Cumella vulgaris	Cumacea	4	1666.67
Restored Low	2004	2004-05-24	7	Nematoda	Nematoda	2	833.333
Reference High	2004	2004-05-24	1	Nematoda	Nematoda	1	416.667
Reference High	2004	2004-05-24	1	Chironomidae larva	Insecta larva	2	833.333
Reference High	2004	2004-05-24	1	Corophiidae	Amphipoda	47	19583.3
Reference High	2004	2004-05-24	1	Americorophium spinicorne	Amphipoda	42	17500
Reference High	2004	2004-05-24	1	Eogammarus confervicolus	Amphipoda	7	2916.67
Reference High	2004	2004-05-24	1	Spionidae	Polychaeta	7	2916.67
Reference High	2004	2004-05-24	1	Oligochaeta	Oligochaeta	34	14166.7
Reference High	2004	2004-05-24	2	Nematoda	Nematoda	2	833.333
Reference High	2004	2004-05-24	2	Chironomidae larva	Insecta larva	2	833.333
Reference High	2004	2004-05-24	2	Corophiidae	Amphipoda	31	12916.7
Reference High	2004	2004-05-24	2	Americorophium spinicorne	Amphipoda	38	15833.3
Reference High	2004	2004-05-24	2	Eogammarus confervicolus	Amphipoda	5	2083.33
Reference High	2004	2004-05-24	2	Spionidae	Polychaeta	5	2083.33
Reference High	2004	2004-05-24	2	Oligochaeta	Oligochaeta	39	16250
Reference High	2004	2004-05-24	2	Nereididae	Polychaeta	1	416.667
Reference High	2004	2004-05-24	3	Eogammarus confervicolus	Amphipoda	23	9583.33
Reference High	2004	2004-05-24	3	Americorophium spinicorne	Amphipoda	47	19583.3
Reference High	2004	2004-05-24	3	Corophiidae	Amphipoda	51	21250
Reference High	2004	2004-05-24	3	Oligochaeta	Oligochaeta	38	15833.3
Reference High	2004	2004-05-24	3	Spionidae	Polychaeta	6	2500
Reference High	2004	2004-05-24	3	Sinelobus stanfordi	Tanaidacea	3	1250
Reference High	2004	2004-05-24	3	Chironomidae larva	Insecta larva	1	416.667
Reference High	2004	2004-05-24	3	Nematoda	Nematoda	2	833.333
Reference High	2004	2004-05-24	4	Eogammarus confervicolus	Amphipoda	17	7083.33
Reference High	2004	2004-05-24	4	Americorophium spinicorne	Amphipoda	34	14166.7
Reference High	2004	2004-05-24	4	Corophiidae	Amphipoda	48	20000
Reference High	2004	2004-05-24	4	Chironomidae larva	Insecta larva	3	1250
Reference High	2004	2004-05-24	4	Manayunkia aestuarina	Polychaeta	1	416.667
Reference High	2004	2004-05-24	4	Spionidae	Polychaeta	9	3750
Reference High	2004	2004-05-24	4	Oligochaeta	Oligochaeta	66	27500
Reference High	2004	2004-05-24	4	Nematoda	Nematoda	7	2916.67
Reference High	2004	2004-05-24	5	Americorophium spinicorne	Amphipoda	27	11250
Reference High	2004	2004-05-24	5	Eogammarus confervicolus	Amphipoda	13	5416.67
Reference High	2004	2004-05-24	5	Corophiidae	Amphipoda	65	27083.3
Reference High	2004	2004-05-24	5	Harpacticus spp. A	Harpacticoida	1	416.667
Reference High	2004	2004-05-24	5	Chironomidae larva	Insecta larva	3	1250
Reference High	2004	2004-05-24	5	Manayunkia aestuarina	Polychaeta	2	833.333
Reference High	2004	2004-05-24	5	Spionidae	Polychaeta	22	9166.67
Reference High	2004	2004-05-24	5	Oligochaeta	Oligochaeta	79	32916.7
Reference High	2004	2004-05-24	5	Nematoda	Nematoda	8	3333.33
Reference High	2004	2004-05-24	5	Sinelobus stanfordi	Tanaidacea	1	416.667
Reference High	2004	2004-05-24	6	Eogammarus confervicolus	Amphipoda	14	5833.33
Reference High	2004	2004-05-24	6	Americorophium spinicorne	Amphipoda	47	19583.3
Reference High	2004	2004-05-24	6	Harpacticus spp. A	Harpacticoida	1	416.667
Reference High	2004	2004-05-24	6	Chironomidae larva	Insecta larva	6	2500
Reference High	2004	2004-05-24	6	Spionidae	Polychaeta	31	12916.7
Reference High	2004	2004-05-24	6	Oligochaeta	Oligochaeta	62	25833.3
Reference High	2004	2004-05-24	6	Nematoda	Nematoda	10	4166.67
Reference High	2004	2004-05-24	6	Sinelobus stanfordi	Tanaidacea	2	833.333
Reference High	2004	2004-05-24	6	Corophiidae	Amphipoda	76	31666.7
Reference High	2004	2004-05-24	7	Turbellaria	Turbellaria	1	416.667
Reference High	2004	2004-05-24	7	Nematoda	Nematoda	7	2916.67
Reference High	2004	2004-05-24	7	Oligochaeta	Oligochaeta	52	21666.7
Reference High	2004	2004-05-24	7	Spionidae	Polychaeta	4	1666.67
Reference High	2004	2004-05-24	7	Manayunkia aestuarina	Polychaeta	2	833.333
Reference High	2004	2004-05-24	7	Chironomidae larva	Insecta larva	5	2083.33
Reference High	2004	2004-05-24	7	Harpacticus spp. A	Harpacticoida	1	416.667
Reference High	2004	2004-05-24	7	Corophiidae	Amphipoda	58	24166.7
Reference High	2004	2004-05-24	7	Americorophium spinicorne	Amphipoda	27	11250
Reference High	2004	2004-05-24	7	Laophontidae	Harpacticoida	1	416.667
Reference High	2004	2004-05-24	7	Sinelobus stanfordi	Tanaidacea	1	416.667
Reference High	2004	2004-05-24	7	Eogammarus confervicolus	Amphipoda	26	10833.3
Reference Low	2004	2004-05-24	1	Eogammarus confervicolus	Amphipoda	5	2083.33
Reference Low	2004	2004-05-24	1	Monocorophium insidiosum	Amphipoda	9	3750
Reference Low	2004	2004-05-24	1	Chironomidae larva	Insecta larva	1	416.667
Reference Low	2004	2004-05-24	1	Nematoda	Nematoda	1	416.667
Reference Low	2004	2004-05-24	1	Oligochaeta	Oligochaeta	110	45833.3
Reference Low	2004	2004-05-24	1	Americorophium salmonis	Amphipoda	13	5416.67
Reference Low	2004	2004-05-24	1	Corophiidae	Amphipoda	89	37083.3
Reference Low	2004	2004-05-24	1	Monocorophium acherusicum	Amphipoda	1	416.667
Reference Low	2004	2004-05-24	1	Turbellaria	Turbellaria	9	3750
Reference Low	2004	2004-05-24	1	Spionidae	Polychaeta	1	416.667
Reference Low	2004	2004-05-24	1	Phyllodocidae	Polychaeta	2	833.333
Reference Low	2004	2004-05-24	1	Nereididae	Polychaeta	1	416.667
Reference Low	2004	2004-05-24	1	Ampithoe spp.	Amphipoda	2	833.333
Reference Low	2004	2004-05-24	1	Cumella vulgaris	Cumacea	39	16250
Reference Low	2004	2004-05-24	2	Sinelobus stanfordi	Tanaidacea	1	416.667
Reference Low	2004	2004-05-24	2	Americorophium salmonis	Amphipoda	7	2916.67
Reference Low	2004	2004-05-24	2	Nematoda	Nematoda	1	416.667
Reference Low	2004	2004-05-24	2	Oligochaeta	Oligochaeta	122	50833.3
Reference Low	2004	2004-05-24	2	Cumella vulgaris	Cumacea	17	7083.33
Reference Low	2004	2004-05-24	2	Monocorophium insidiosum	Amphipoda	3	1250
Reference Low	2004	2004-05-24	2	Corophiidae	Amphipoda	66	27500
Reference Low	2004	2004-05-24	2	Turbellaria	Turbellaria	18	7500
Reference Low	2004	2004-05-24	2	Phyllodocidae	Polychaeta	1	416.667
Reference Low	2004	2004-05-24	2	Eogammarus confervicolus	Amphipoda	9	3750
Reference Low	2004	2004-05-24	3	Cumella vulgaris	Cumacea	72	30000
Reference Low	2004	2004-05-24	3	Americorophium salmonis	Amphipoda	6	2500
Reference Low	2004	2004-05-24	3	Monocorophium insidiosum	Amphipoda	6	2500
Reference Low	2004	2004-05-24	3	Capitellidae	Polychaeta	1	416.667
Reference Low	2004	2004-05-24	3	Nematoda	Nematoda	5	2083.33
Reference Low	2004	2004-05-24	3	Oligochaeta	Oligochaeta	99	41250
Reference Low	2004	2004-05-24	3	Corophiidae	Amphipoda	87	36250
Reference Low	2004	2004-05-24	3	Eogammarus confervicolus	Amphipoda	21	8750
Reference Low	2004	2004-05-24	3	Turbellaria	Turbellaria	16	6666.67
Reference Low	2004	2004-05-24	3	Gnorimosphaeroma oregonense	Isopoda	1	416.667
Reference Low	2004	2004-05-24	3	Amphipoda	Amphipoda	2	833.333
Reference Low	2004	2004-05-24	3	Ampithoe spp.	Amphipoda	1	416.667
Reference Low	2004	2004-05-24	4	Sinelobus stanfordi	Tanaidacea	2	833.333
Reference Low	2004	2004-05-24	4	Monocorophium insidiosum	Amphipoda	7	2916.67
Reference Low	2004	2004-05-24	4	Nereididae	Polychaeta	1	416.667
Reference Low	2004	2004-05-24	4	Nematoda	Nematoda	2	833.333
Reference Low	2004	2004-05-24	4	Oligochaeta	Oligochaeta	49	20416.7
Reference Low	2004	2004-05-24	4	Corophiidae	Amphipoda	57	23750
Reference Low	2004	2004-05-24	4	Eogammarus confervicolus	Amphipoda	13	5416.67
Reference Low	2004	2004-05-24	4	Cumella vulgaris	Cumacea	54	22500
Reference Low	2004	2004-05-24	4	Americorophium salmonis	Amphipoda	15	6250
Reference Low	2004	2004-05-24	4	Turbellaria	Turbellaria	9	3750
Reference Low	2004	2004-05-24	5	Cumella vulgaris	Cumacea	21	8750
Reference Low	2004	2004-05-24	5	Macoma spp.	Bivalvia	1	416.667
Reference Low	2004	2004-05-24	5	Polychaeta	Polychaeta	1	416.667
Reference Low	2004	2004-05-24	5	Americorophium spinicorne	Amphipoda	1	416.667
Reference Low	2004	2004-05-24	5	Monocorophium insidiosum	Amphipoda	5	2083.33
Reference Low	2004	2004-05-24	5	Americorophium salmonis	Amphipoda	9	3750
Reference Low	2004	2004-05-24	5	Oligochaeta	Oligochaeta	91	37916.7
Reference Low	2004	2004-05-24	5	Corophiidae	Amphipoda	72	30000
Reference Low	2004	2004-05-24	5	Eogammarus confervicolus	Amphipoda	12	5000
Reference Low	2004	2004-05-24	5	Turbellaria	Turbellaria	18	7500
Reference Low	2004	2004-05-24	5	Chironomidae larva	Insecta larva	1	416.667
Reference Low	2004	2004-05-24	5	Sinelobus stanfordi	Tanaidacea	1	416.667
Reference Low	2004	2004-05-24	5	Nematoda	Nematoda	2	833.333
Reference Low	2004	2004-05-24	6	Corophiidae	Amphipoda	76	31666.7
Reference Low	2004	2004-05-24	6	Spionidae	Polychaeta	1	416.667
Reference Low	2004	2004-05-24	6	Ampithoe spp.	Amphipoda	1	416.667
Reference Low	2004	2004-05-24	6	Turbellaria	Turbellaria	12	5000
Reference Low	2004	2004-05-24	6	Eogammarus confervicolus	Amphipoda	6	2500
Reference Low	2004	2004-05-24	6	Monocorophium insidiosum	Amphipoda	7	2916.67
Reference Low	2004	2004-05-24	6	Cumella vulgaris	Cumacea	41	17083.3
Reference Low	2004	2004-05-24	6	Oligochaeta	Oligochaeta	88	36666.7
Reference Low	2004	2004-05-24	6	Nematoda	Nematoda	2	833.333
Reference Low	2004	2004-05-24	6	Americorophium spinicorne	Amphipoda	1	416.667
Reference Low	2004	2004-05-24	6	Americorophium salmonis	Amphipoda	16	6666.67
Reference Low	2004	2004-05-24	6	Monocorophium acherusicum	Amphipoda	1	416.667
Reference Low	2004	2004-05-24	7	Sinelobus stanfordi	Tanaidacea	1	416.667
Reference Low	2004	2004-05-24	7	Turbellaria	Turbellaria	17	7083.33
Reference Low	2004	2004-05-24	7	Eogammarus confervicolus	Amphipoda	8	3333.33
Reference Low	2004	2004-05-24	7	Corophiidae	Amphipoda	70	29166.7
Reference Low	2004	2004-05-24	7	Monocorophium insidiosum	Amphipoda	10	4166.67
Reference Low	2004	2004-05-24	7	Americorophium salmonis	Amphipoda	16	6666.67
Reference Low	2004	2004-05-24	7	Cumella vulgaris	Cumacea	27	11250
Reference Low	2004	2004-05-24	7	Oligochaeta	Oligochaeta	90	37500
Reference Low	2004	2004-05-24	7	Nematoda	Nematoda	2	833.333
Reference Low	2004	2004-05-24	7	Mya arenaria	Bivalvia	1	416.667
Restored High	2004	2004-06-07	1	Spionidae	Polychaeta	10	4166.67
Restored High	2004	2004-06-07	1	Eogammarus confervicolus	Amphipoda	6	2500
Restored High	2004	2004-06-07	1	Americorophium spinicorne	Amphipoda	25	10416.7
Restored High	2004	2004-06-07	1	Corophiidae	Amphipoda	48	20000
Restored High	2004	2004-06-07	1	Harpacticus spp. A	Harpacticoida	1	416.667
Restored High	2004	2004-06-07	1	Manayunkia aestuarina	Polychaeta	14	5833.33
Restored High	2004	2004-06-07	1	Oligochaeta	Oligochaeta	27	11250
Restored High	2004	2004-06-07	1	Chironomidae larva	Insecta larva	3	1250
Restored High	2004	2004-06-07	2	Oligochaeta	Oligochaeta	34	14166.7
Restored High	2004	2004-06-07	2	Manayunkia aestuarina	Polychaeta	14	5833.33
Restored High	2004	2004-06-07	2	Harpacticus spp. A	Harpacticoida	3	1250
Restored High	2004	2004-06-07	2	Turbellaria	Turbellaria	1	416.667
Restored High	2004	2004-06-07	2	Americorophium spinicorne	Amphipoda	9	3750
Restored High	2004	2004-06-07	2	Eogammarus confervicolus	Amphipoda	4	1666.67
Restored High	2004	2004-06-07	2	Spionidae	Polychaeta	7	2916.67
Restored High	2004	2004-06-07	2	Sinelobus stanfordi	Tanaidacea	1	416.667
Restored High	2004	2004-06-07	2	Corophiidae	Amphipoda	31	12916.7
Restored High	2004	2004-06-07	3	Americorophium spinicorne	Amphipoda	20	8333.33
Restored High	2004	2004-06-07	3	Corophiidae	Amphipoda	28	11666.7
Restored High	2004	2004-06-07	3	Harpacticus spp. A	Harpacticoida	1	416.667
Restored High	2004	2004-06-07	3	Nematoda	Nematoda	1	416.667
Restored High	2004	2004-06-07	3	Chironomidae larva	Insecta larva	2	833.333
Restored High	2004	2004-06-07	3	Manayunkia aestuarina	Polychaeta	7	2916.67
Restored High	2004	2004-06-07	3	Spionidae	Polychaeta	12	5000
Restored High	2004	2004-06-07	3	Eogammarus confervicolus	Amphipoda	3	1250
Restored High	2004	2004-06-07	3	Ampithoe spp.	Amphipoda	1	416.667
Restored High	2004	2004-06-07	3	Turbellaria	Turbellaria	1	416.667
Restored High	2004	2004-06-07	3	Oligochaeta	Oligochaeta	29	12083.3
Restored High	2004	2004-06-07	3	Amphipoda	Amphipoda	1	416.667
Restored High	2004	2004-06-07	4	Manayunkia aestuarina	Polychaeta	8	3333.33
Restored High	2004	2004-06-07	4	Amphipoda	Amphipoda	1	416.667
Restored High	2004	2004-06-07	4	Nematoda	Nematoda	1	416.667
Restored High	2004	2004-06-07	4	Oligochaeta	Oligochaeta	27	11250
Restored High	2004	2004-06-07	4	Turbellaria	Turbellaria	1	416.667
Restored High	2004	2004-06-07	4	Eogammarus confervicolus	Amphipoda	3	1250
Restored High	2004	2004-06-07	4	Harpacticus spp. A	Harpacticoida	3	1250
Restored High	2004	2004-06-07	4	Spionidae	Polychaeta	4	1666.67
Restored High	2004	2004-06-07	4	Americorophium spinicorne	Amphipoda	16	6666.67
Restored High	2004	2004-06-07	4	Chironomidae larva	Insecta larva	3	1250
Restored High	2004	2004-06-07	4	Corophiidae	Amphipoda	42	17500
Restored High	2004	2004-06-07	5	Corophiidae	Amphipoda	50	20833.3
Restored High	2004	2004-06-07	5	Americorophium spinicorne	Amphipoda	22	9166.67
Restored High	2004	2004-06-07	5	Ampithoe spp.	Amphipoda	1	416.667
Restored High	2004	2004-06-07	5	Harpacticus spp. A	Harpacticoida	1	416.667
Restored High	2004	2004-06-07	5	Manayunkia aestuarina	Polychaeta	4	1666.67
Restored High	2004	2004-06-07	5	Oligochaeta	Oligochaeta	25	10416.7
Restored High	2004	2004-06-07	5	Chironomidae larva	Insecta larva	3	1250
Restored High	2004	2004-06-07	5	Eogammarus confervicolus	Amphipoda	2	833.333
Restored High	2004	2004-06-07	5	Spionidae	Polychaeta	17	7083.33
Restored High	2004	2004-06-07	6	Manayunkia aestuarina	Polychaeta	5	2083.33
Restored High	2004	2004-06-07	6	Spionidae	Polychaeta	11	4583.33
Restored High	2004	2004-06-07	6	Chironomidae larva	Insecta larva	5	2083.33
Restored High	2004	2004-06-07	6	Harpacticus spp. A	Harpacticoida	1	416.667
Restored High	2004	2004-06-07	6	Corophiidae	Amphipoda	29	12083.3
Restored High	2004	2004-06-07	6	Americorophium spinicorne	Amphipoda	13	5416.67
Restored High	2004	2004-06-07	6	Eogammarus confervicolus	Amphipoda	5	2083.33
Restored High	2004	2004-06-07	6	Laophontidae	Harpacticoida	1	416.667
Restored High	2004	2004-06-07	6	Sinelobus stanfordi	Tanaidacea	1	416.667
Restored High	2004	2004-06-07	6	Oligochaeta	Oligochaeta	15	6250
Restored High	2004	2004-06-07	7	Manayunkia aestuarina	Polychaeta	15	6250
Restored High	2004	2004-06-07	7	Nematoda	Nematoda	1	416.667
Restored High	2004	2004-06-07	7	Spionidae	Polychaeta	18	7500
Restored High	2004	2004-06-07	7	Chironomidae larva	Insecta larva	6	2500
Restored High	2004	2004-06-07	7	Harpacticus spp. A	Harpacticoida	2	833.333
Restored High	2004	2004-06-07	7	Corophiidae	Amphipoda	46	19166.7
Restored High	2004	2004-06-07	7	Americorophium spinicorne	Amphipoda	26	10833.3
Restored High	2004	2004-06-07	7	Eogammarus confervicolus	Amphipoda	2	833.333
Restored High	2004	2004-06-07	7	Oligochaeta	Oligochaeta	50	20833.3
Restored Low	2004	2004-06-07	1	Corophiidae	Amphipoda	23	9583.33
Restored Low	2004	2004-06-07	1	Monocorophium insidiosum	Amphipoda	1	416.667
Restored Low	2004	2004-06-07	1	Cumella vulgaris	Cumacea	5	2083.33
Restored Low	2004	2004-06-07	1	Oligochaeta	Oligochaeta	1	416.667
Restored Low	2004	2004-06-07	1	Nematoda	Nematoda	1	416.667
Restored Low	2004	2004-06-07	1	Eogammarus confervicolus	Amphipoda	2	833.333
Restored Low	2004	2004-06-07	2	Corophiidae	Amphipoda	17	7083.33
Restored Low	2004	2004-06-07	2	Nematoda	Nematoda	1	416.667
Restored Low	2004	2004-06-07	2	Oligochaeta	Oligochaeta	7	2916.67
Restored Low	2004	2004-06-07	2	Monocorophium insidiosum	Amphipoda	3	1250
Restored Low	2004	2004-06-07	2	Americorophium spinicorne	Amphipoda	3	1250
Restored Low	2004	2004-06-07	2	Eogammarus confervicolus	Amphipoda	1	416.667
Restored Low	2004	2004-06-07	2	Polychaeta	Polychaeta	1	416.667
Restored Low	2004	2004-06-07	2	Capitellidae	Polychaeta	1	416.667
Restored Low	2004	2004-06-07	2	Cumella vulgaris	Cumacea	10	4166.67
Restored Low	2004	2004-06-07	3	Macoma spp.	Bivalvia	1	416.667
Restored Low	2004	2004-06-07	3	Nematoda	Nematoda	2	833.333
Restored Low	2004	2004-06-07	3	Oligochaeta	Oligochaeta	7	2916.67
Restored Low	2004	2004-06-07	3	Cumella vulgaris	Cumacea	18	7500
Restored Low	2004	2004-06-07	3	Corophiidae	Amphipoda	24	10000
Restored Low	2004	2004-06-07	3	Americorophium spinicorne	Amphipoda	3	1250
Restored Low	2004	2004-06-07	3	Eogammarus confervicolus	Amphipoda	2	833.333
Restored Low	2004	2004-06-07	3	Sinelobus stanfordi	Tanaidacea	1	416.667
Restored Low	2004	2004-06-07	3	Capitellidae	Polychaeta	1	416.667
Restored Low	2004	2004-06-07	4	Corophiidae	Amphipoda	16	6666.67
Restored Low	2004	2004-06-07	4	Capitellidae	Polychaeta	2	833.333
Restored Low	2004	2004-06-07	4	Americorophium spinicorne	Amphipoda	1	416.667
Restored Low	2004	2004-06-07	4	Monocorophium insidiosum	Amphipoda	1	416.667
Restored Low	2004	2004-06-07	4	Oligochaeta	Oligochaeta	14	5833.33
Restored Low	2004	2004-06-07	4	Nematoda	Nematoda	2	833.333
Restored Low	2004	2004-06-07	4	Cumella vulgaris	Cumacea	3	1250
Restored Low	2004	2004-06-07	5	Cumella vulgaris	Cumacea	8	3333.33
Restored Low	2004	2004-06-07	5	Sinelobus stanfordi	Tanaidacea	1	416.667
Restored Low	2004	2004-06-07	5	Capitellidae	Polychaeta	1	416.667
Restored Low	2004	2004-06-07	5	Eogammarus confervicolus	Amphipoda	1	416.667
Restored Low	2004	2004-06-07	5	Corophiidae	Amphipoda	16	6666.67
Restored Low	2004	2004-06-07	5	Phyllodocidae	Polychaeta	1	416.667
Restored Low	2004	2004-06-07	5	Oligochaeta	Oligochaeta	18	7500
Restored Low	2004	2004-06-07	5	Nematoda	Nematoda	2	833.333
Restored Low	2004	2004-06-07	5	Americorophium spinicorne	Amphipoda	2	833.333
Restored Low	2004	2004-06-07	6	Nematoda	Nematoda	1	416.667
Restored Low	2004	2004-06-07	6	Capitellidae	Polychaeta	2	833.333
Restored Low	2004	2004-06-07	6	Polychaeta	Polychaeta	1	416.667
Restored Low	2004	2004-06-07	6	Americorophium spinicorne	Amphipoda	1	416.667
Restored Low	2004	2004-06-07	6	Corophiidae	Amphipoda	21	8750
Restored Low	2004	2004-06-07	6	Cumella vulgaris	Cumacea	5	2083.33
Restored Low	2004	2004-06-07	6	Oligochaeta	Oligochaeta	16	6666.67
Restored Low	2004	2004-06-07	7	Oligochaeta	Oligochaeta	14	5833.33
Restored Low	2004	2004-06-07	7	Corophiidae	Amphipoda	24	10000
Restored Low	2004	2004-06-07	7	Cumella vulgaris	Cumacea	18	7500
Restored Low	2004	2004-06-07	7	Nematoda	Nematoda	2	833.333
Reference High	2004	2004-06-07	1	Spionidae	Polychaeta	52	21666.7
Reference High	2004	2004-06-07	1	Monocorophium insidiosum	Amphipoda	3	1250
Reference High	2004	2004-06-07	1	Oligochaeta	Oligochaeta	72	30000
Reference High	2004	2004-06-07	1	Manayunkia aestuarina	Polychaeta	1	416.667
Reference High	2004	2004-06-07	1	Chironomidae larva	Insecta larva	10	4166.67
Reference High	2004	2004-06-07	1	Harpacticus spp. A	Harpacticoida	4	1666.67
Reference High	2004	2004-06-07	1	Corophiidae	Amphipoda	9	3750
Reference High	2004	2004-06-07	1	Americorophium spinicorne	Amphipoda	13	5416.67
Reference High	2004	2004-06-07	1	Ampithoe spp.	Amphipoda	3	1250
Reference High	2004	2004-06-07	1	Nematoda	Nematoda	6	2500
Reference High	2004	2004-06-07	2	Corophiidae	Amphipoda	13	5416.67
Reference High	2004	2004-06-07	2	Spionidae	Polychaeta	55	22916.7
Reference High	2004	2004-06-07	2	Nematoda	Nematoda	2	833.333
Reference High	2004	2004-06-07	2	Oligochaeta	Oligochaeta	99	41250
Reference High	2004	2004-06-07	2	Manayunkia aestuarina	Polychaeta	2	833.333
Reference High	2004	2004-06-07	2	Harpacticus spp. A	Harpacticoida	5	2083.33
Reference High	2004	2004-06-07	2	Americorophium spinicorne	Amphipoda	20	8333.33
Reference High	2004	2004-06-07	2	Phyllodocidae	Polychaeta	2	833.333
Reference High	2004	2004-06-07	2	Monocorophium insidiosum	Amphipoda	3	1250
Reference High	2004	2004-06-07	2	Chironomidae larva	Insecta larva	10	4166.67
Reference High	2004	2004-06-07	3	Chironomidae larva	Insecta larva	9	3750
Reference High	2004	2004-06-07	3	Huntemannia jadensis	Harpacticoida	1	416.667
Reference High	2004	2004-06-07	3	Nematoda	Nematoda	8	3333.33
Reference High	2004	2004-06-07	3	Oligochaeta	Oligochaeta	34	14166.7
Reference High	2004	2004-06-07	3	Spionidae	Polychaeta	32	13333.3
Reference High	2004	2004-06-07	3	Corophiidae	Amphipoda	13	5416.67
Reference High	2004	2004-06-07	3	Amphipoda	Amphipoda	1	416.667
Reference High	2004	2004-06-07	3	Monocorophium insidiosum	Amphipoda	5	2083.33
Reference High	2004	2004-06-07	3	Sinelobus stanfordi	Tanaidacea	1	416.667
Reference High	2004	2004-06-07	3	Insecta larva	Insecta larva	1	416.667
Reference High	2004	2004-06-07	3	Harpacticus spp. A	Harpacticoida	1	416.667
Reference High	2004	2004-06-07	3	Phyllodocidae	Polychaeta	1	416.667
Reference High	2004	2004-06-07	4	Corophiidae	Amphipoda	11	4583.33
Reference High	2004	2004-06-07	4	Sinelobus stanfordi	Tanaidacea	1	416.667
Reference High	2004	2004-06-07	4	Nematoda	Nematoda	4	1666.67
Reference High	2004	2004-06-07	4	Oligochaeta	Oligochaeta	40	16666.7
Reference High	2004	2004-06-07	4	Spionidae	Polychaeta	62	25833.3
Reference High	2004	2004-06-07	4	Chironomidae larva	Insecta larva	4	1666.67
Reference High	2004	2004-06-07	4	Americorophium spinicorne	Amphipoda	1	416.667
Reference High	2004	2004-06-07	4	Monocorophium insidiosum	Amphipoda	9	3750
Reference High	2004	2004-06-07	4	Huntemannia jadensis	Harpacticoida	1	416.667
Reference High	2004	2004-06-07	4	Manayunkia aestuarina	Polychaeta	1	416.667
Reference High	2004	2004-06-07	4	Americorophium salmonis	Amphipoda	1	416.667
Reference High	2004	2004-06-07	5	Nematoda	Nematoda	5	2083.33
Reference High	2004	2004-06-07	5	Sinelobus stanfordi	Tanaidacea	3	1250
Reference High	2004	2004-06-07	5	Phyllodocidae	Polychaeta	4	1666.67
Reference High	2004	2004-06-07	5	Monocorophium insidiosum	Amphipoda	12	5000
Reference High	2004	2004-06-07	5	Americorophium salmonis	Amphipoda	2	833.333
Reference High	2004	2004-06-07	5	Americorophium spinicorne	Amphipoda	3	1250
Reference High	2004	2004-06-07	5	Amphipoda	Amphipoda	1	416.667
Reference High	2004	2004-06-07	5	Corophiidae	Amphipoda	17	7083.33
Reference High	2004	2004-06-07	5	Chironomidae larva	Insecta larva	7	2916.67
Reference High	2004	2004-06-07	5	Manayunkia aestuarina	Polychaeta	1	416.667
Reference High	2004	2004-06-07	5	Spionidae	Polychaeta	54	22500
Reference High	2004	2004-06-07	5	Oligochaeta	Oligochaeta	37	15416.7
Reference High	2004	2004-06-07	6	Chironomidae larva	Insecta larva	3	1250
Reference High	2004	2004-06-07	6	Sinelobus stanfordi	Tanaidacea	2	833.333
Reference High	2004	2004-06-07	6	Americorophium salmonis	Amphipoda	2	833.333
Reference High	2004	2004-06-07	6	Harpacticus spp. A	Harpacticoida	1	416.667
Reference High	2004	2004-06-07	6	Manayunkia aestuarina	Polychaeta	1	416.667
Reference High	2004	2004-06-07	6	Spionidae	Polychaeta	59	24583.3
Reference High	2004	2004-06-07	6	Oligochaeta	Oligochaeta	35	14583.3
Reference High	2004	2004-06-07	6	Nematoda	Nematoda	2	833.333
Reference High	2004	2004-06-07	6	Monocorophium insidiosum	Amphipoda	9	3750
Reference High	2004	2004-06-07	6	Americorophium spinicorne	Amphipoda	3	1250
Reference High	2004	2004-06-07	6	Corophiidae	Amphipoda	16	6666.67
Reference High	2004	2004-06-07	7	Sinelobus stanfordi	Tanaidacea	1	416.667
Reference High	2004	2004-06-07	7	Monocorophium insidiosum	Amphipoda	5	2083.33
Reference High	2004	2004-06-07	7	Corophiidae	Amphipoda	12	5000
Reference High	2004	2004-06-07	7	Chironomidae larva	Insecta larva	9	3750
Reference High	2004	2004-06-07	7	Manayunkia aestuarina	Polychaeta	1	416.667
Reference High	2004	2004-06-07	7	Spionidae	Polychaeta	39	16250
Reference High	2004	2004-06-07	7	Americorophium salmonis	Amphipoda	3	1250
Reference High	2004	2004-06-07	7	Americorophium spinicorne	Amphipoda	1	416.667
Reference High	2004	2004-06-07	7	Eogammarus confervicolus	Amphipoda	1	416.667
Reference High	2004	2004-06-07	7	Ampithoe spp.	Amphipoda	3	1250
Reference High	2004	2004-06-07	7	Nematoda	Nematoda	5	2083.33
Reference High	2004	2004-06-07	7	Oligochaeta	Oligochaeta	22	9166.67
Reference Low	2004	2004-06-07	1	Capitellidae	Polychaeta	1	416.667
Reference Low	2004	2004-06-07	1	Oligochaeta	Oligochaeta	34	14166.7
Reference Low	2004	2004-06-07	1	Phyllodocidae	Polychaeta	1	416.667
Reference Low	2004	2004-06-07	1	Cumella vulgaris	Cumacea	20	8333.33
Reference Low	2004	2004-06-07	1	Americorophium salmonis	Amphipoda	16	6666.67
Reference Low	2004	2004-06-07	1	Corophiidae	Amphipoda	60	25000
Reference Low	2004	2004-06-07	1	Monocorophium insidiosum	Amphipoda	1	416.667
Reference Low	2004	2004-06-07	1	Ampithoe spp.	Amphipoda	2	833.333
Reference Low	2004	2004-06-07	1	Macoma spp.	Bivalvia	1	416.667
Reference Low	2004	2004-06-07	1	Chironomidae larva	Insecta larva	2	833.333
Reference Low	2004	2004-06-07	1	Nematoda	Nematoda	3	1250
Reference Low	2004	2004-06-07	1	Monocorophium acherusicum	Amphipoda	1	416.667
Reference Low	2004	2004-06-07	1	Americorophium spinicorne	Amphipoda	1	416.667
Reference Low	2004	2004-06-07	2	Nematoda	Nematoda	4	1666.67
Reference Low	2004	2004-06-07	2	Oligochaeta	Oligochaeta	41	17083.3
Reference Low	2004	2004-06-07	2	Cumella vulgaris	Cumacea	29	12083.3
Reference Low	2004	2004-06-07	2	Americorophium salmonis	Amphipoda	12	5000
Reference Low	2004	2004-06-07	2	Monocorophium insidiosum	Amphipoda	3	1250
Reference Low	2004	2004-06-07	2	Corophiidae	Amphipoda	67	27916.7
Reference Low	2004	2004-06-07	2	Chironomidae larva	Insecta larva	2	833.333
Reference Low	2004	2004-06-07	2	Americorophium spinicorne	Amphipoda	2	833.333
Reference Low	2004	2004-06-07	2	Polychaeta	Polychaeta	1	416.667
Reference Low	2004	2004-06-07	3	Cumella vulgaris	Cumacea	23	9583.33
Reference Low	2004	2004-06-07	3	Oligochaeta	Oligochaeta	37	15416.7
Reference Low	2004	2004-06-07	3	Americorophium salmonis	Amphipoda	18	7500
Reference Low	2004	2004-06-07	3	Monocorophium insidiosum	Amphipoda	4	1666.67
Reference Low	2004	2004-06-07	3	Phyllodocidae	Polychaeta	1	416.667
Reference Low	2004	2004-06-07	3	Chironomidae larva	Insecta larva	1	416.667
Reference Low	2004	2004-06-07	3	Turbellaria	Turbellaria	1	416.667
Reference Low	2004	2004-06-07	3	Sinelobus stanfordi	Tanaidacea	1	416.667
Reference Low	2004	2004-06-07	3	Corophiidae	Amphipoda	54	22500
Reference Low	2004	2004-06-07	3	Nematoda	Nematoda	2	833.333
Reference Low	2004	2004-06-07	3	Capitellidae	Polychaeta	1	416.667
Reference Low	2004	2004-06-07	4	Americorophium spinicorne	Amphipoda	2	833.333
Reference Low	2004	2004-06-07	4	Nematoda	Nematoda	2	833.333
Reference Low	2004	2004-06-07	4	Oligochaeta	Oligochaeta	26	10833.3
Reference Low	2004	2004-06-07	4	Cumella vulgaris	Cumacea	6	2500
Reference Low	2004	2004-06-07	4	Corophiidae	Amphipoda	41	17083.3
Reference Low	2004	2004-06-07	4	Monocorophium insidiosum	Amphipoda	1	416.667
Reference Low	2004	2004-06-07	4	Ampithoe spp.	Amphipoda	1	416.667
Reference Low	2004	2004-06-07	4	Phyllodocidae	Polychaeta	1	416.667
Reference Low	2004	2004-06-07	4	Macoma spp.	Bivalvia	1	416.667
Reference Low	2004	2004-06-07	4	Chironomidae larva	Insecta larva	1	416.667
Reference Low	2004	2004-06-07	4	Americorophium salmonis	Amphipoda	12	5000
Reference Low	2004	2004-06-07	5	Corophiidae	Amphipoda	51	21250
Reference Low	2004	2004-06-07	5	Oligochaeta	Oligochaeta	28	11666.7
Reference Low	2004	2004-06-07	5	Monocorophium insidiosum	Amphipoda	2	833.333
Reference Low	2004	2004-06-07	5	Americorophium salmonis	Amphipoda	8	3333.33
Reference Low	2004	2004-06-07	5	Nematoda	Nematoda	2	833.333
Reference Low	2004	2004-06-07	5	Cumella vulgaris	Cumacea	10	4166.67
Reference Low	2004	2004-06-07	5	Turbellaria	Turbellaria	2	833.333
Reference Low	2004	2004-06-07	5	Chironomidae larva	Insecta larva	1	416.667
Reference Low	2004	2004-06-07	5	Anthozoa	Anthozoa	1	416.667
Reference Low	2004	2004-06-07	5	Macoma spp.	Bivalvia	1	416.667
Reference Low	2004	2004-06-07	5	Phyllodocidae	Polychaeta	1	416.667
Reference Low	2004	2004-06-07	5	Capitellidae	Polychaeta	2	833.333
Reference Low	2004	2004-06-07	6	Glyceridae	Polychaeta	1	416.667
Reference Low	2004	2004-06-07	6	Phyllodocidae	Polychaeta	1	416.667
Reference Low	2004	2004-06-07	6	Capitellidae	Polychaeta	1	416.667
Reference Low	2004	2004-06-07	6	Monocorophium insidiosum	Amphipoda	4	1666.67
Reference Low	2004	2004-06-07	6	Americorophium salmonis	Amphipoda	19	7916.67
Reference Low	2004	2004-06-07	6	Americorophium spinicorne	Amphipoda	2	833.333
Reference Low	2004	2004-06-07	6	Corophiidae	Amphipoda	64	26666.7
Reference Low	2004	2004-06-07	6	Nematoda	Nematoda	3	1250
Reference Low	2004	2004-06-07	6	Chironomidae larva	Insecta larva	1	416.667
Reference Low	2004	2004-06-07	6	Macoma spp.	Bivalvia	1	416.667
Reference Low	2004	2004-06-07	6	Oligochaeta	Oligochaeta	37	15416.7
Reference Low	2004	2004-06-07	6	Cumella vulgaris	Cumacea	15	6250
Reference Low	2004	2004-06-07	7	Phyllodocidae	Polychaeta	1	416.667
Reference Low	2004	2004-06-07	7	Monocorophium insidiosum	Amphipoda	2	833.333
Reference Low	2004	2004-06-07	7	Cumella vulgaris	Cumacea	18	7500
Reference Low	2004	2004-06-07	7	Nematoda	Nematoda	3	1250
Reference Low	2004	2004-06-07	7	Americorophium salmonis	Amphipoda	15	6250
Reference Low	2004	2004-06-07	7	Chironomidae larva	Insecta larva	2	833.333
Reference Low	2004	2004-06-07	7	Macoma spp.	Bivalvia	1	416.667
Reference Low	2004	2004-06-07	7	Capitellidae	Polychaeta	1	416.667
Reference Low	2004	2004-06-07	7	Americorophium spinicorne	Amphipoda	2	833.333
Reference Low	2004	2004-06-07	7	Oligochaeta	Oligochaeta	29	12083.3
Reference Low	2004	2004-06-07	7	Corophiidae	Amphipoda	52	21666.7
Restored High	2004	2004-06-14	1	Nematoda	Nematoda	2	833.333
Restored High	2004	2004-06-14	1	Oligochaeta	Oligochaeta	44	18333.3
Restored High	2004	2004-06-14	1	Amphipoda	Amphipoda	1	416.667
Restored High	2004	2004-06-14	1	Americorophium spinicorne	Amphipoda	18	7500
Restored High	2004	2004-06-14	1	Corophiidae	Amphipoda	47	19583.3
Restored High	2004	2004-06-14	1	Harpacticus spp. A	Harpacticoida	1	416.667
Restored High	2004	2004-06-14	1	Chironomidae larva	Insecta larva	8	3333.33
Restored High	2004	2004-06-14	1	Manayunkia aestuarina	Polychaeta	8	3333.33
Restored High	2004	2004-06-14	1	Spionidae	Polychaeta	5	2083.33
Restored High	2004	2004-06-14	1	Turbellaria	Turbellaria	2	833.333
Restored High	2004	2004-06-14	1	Eogammarus confervicolus	Amphipoda	7	2916.67
Restored High	2004	2004-06-14	2	Manayunkia aestuarina	Polychaeta	10	4166.67
Restored High	2004	2004-06-14	2	Spionidae	Polychaeta	6	2500
Restored High	2004	2004-06-14	2	Oligochaeta	Oligochaeta	48	20000
Restored High	2004	2004-06-14	2	Chironomidae larva	Insecta larva	4	1666.67
Restored High	2004	2004-06-14	2	Eogammarus confervicolus	Amphipoda	12	5000
Restored High	2004	2004-06-14	2	Americorophium spinicorne	Amphipoda	18	7500
Restored High	2004	2004-06-14	2	Corophiidae	Amphipoda	58	24166.7
Restored High	2004	2004-06-14	2	Harpacticus spp. A	Harpacticoida	6	2500
Restored High	2004	2004-06-14	3	Manayunkia aestuarina	Polychaeta	6	2500
Restored High	2004	2004-06-14	3	Spionidae	Polychaeta	8	3333.33
Restored High	2004	2004-06-14	3	Chironomidae larva	Insecta larva	7	2916.67
Restored High	2004	2004-06-14	3	Harpacticus spp. A	Harpacticoida	1	416.667
Restored High	2004	2004-06-14	3	Corophiidae	Amphipoda	43	17916.7
Restored High	2004	2004-06-14	3	Americorophium spinicorne	Amphipoda	7	2916.67
Restored High	2004	2004-06-14	3	Eogammarus confervicolus	Amphipoda	1	416.667
Restored High	2004	2004-06-14	3	Oligochaeta	Oligochaeta	31	12916.7
Restored High	2004	2004-06-14	4	Oligochaeta	Oligochaeta	42	17500
Restored High	2004	2004-06-14	4	Amphipoda	Amphipoda	1	416.667
Restored High	2004	2004-06-14	4	Nematoda	Nematoda	2	833.333
Restored High	2004	2004-06-14	4	Spionidae	Polychaeta	13	5416.67
Restored High	2004	2004-06-14	4	Manayunkia aestuarina	Polychaeta	2	833.333
Restored High	2004	2004-06-14	4	Chironomidae larva	Insecta larva	7	2916.67
Restored High	2004	2004-06-14	4	Harpacticus spp. A	Harpacticoida	1	416.667
Restored High	2004	2004-06-14	4	Americorophium spinicorne	Amphipoda	15	6250
Restored High	2004	2004-06-14	4	Huntemannia jadensis	Harpacticoida	1	416.667
Restored High	2004	2004-06-14	4	Cumella vulgaris	Cumacea	1	416.667
Restored High	2004	2004-06-14	4	Corophiidae	Amphipoda	19	7916.67
Restored High	2004	2004-06-14	5	Spionidae	Polychaeta	6	2500
Restored High	2004	2004-06-14	5	Turbellaria	Turbellaria	1	416.667
Restored High	2004	2004-06-14	5	Oligochaeta	Oligochaeta	41	17083.3
Restored High	2004	2004-06-14	5	Chironomidae larva	Insecta larva	6	2500
Restored High	2004	2004-06-14	5	Macoma spp.	Bivalvia	1	416.667
Restored High	2004	2004-06-14	5	Americorophium spinicorne	Amphipoda	24	10000
Restored High	2004	2004-06-14	5	Corophiidae	Amphipoda	40	16666.7
Restored High	2004	2004-06-14	5	Harpacticus spp. A	Harpacticoida	4	1666.67
Restored High	2004	2004-06-14	5	Eogammarus confervicolus	Amphipoda	4	1666.67
Restored High	2004	2004-06-14	5	Manayunkia aestuarina	Polychaeta	29	12083.3
Restored High	2004	2004-06-14	6	Spionidae	Polychaeta	1	416.667
Restored High	2004	2004-06-14	6	Oligochaeta	Oligochaeta	57	23750
Restored High	2004	2004-06-14	6	Manayunkia aestuarina	Polychaeta	18	7500
Restored High	2004	2004-06-14	6	Chironomidae pupa	Insecta larva	1	416.667
Restored High	2004	2004-06-14	6	Chironomidae larva	Insecta larva	6	2500
Restored High	2004	2004-06-14	6	Corophiidae	Amphipoda	72	30000
Restored High	2004	2004-06-14	6	Americorophium spinicorne	Amphipoda	34	14166.7
Restored High	2004	2004-06-14	6	Eogammarus confervicolus	Amphipoda	4	1666.67
Restored High	2004	2004-06-14	6	Nematoda	Nematoda	2	833.333
Restored High	2004	2004-06-14	7	Oligochaeta	Oligochaeta	51	21250
Restored High	2004	2004-06-14	7	Nematoda	Nematoda	3	1250
Restored High	2004	2004-06-14	7	Chironomidae larva	Insecta larva	10	4166.67
Restored High	2004	2004-06-14	7	Eogammarus confervicolus	Amphipoda	3	1250
Restored High	2004	2004-06-14	7	Corophiidae	Amphipoda	74	30833.3
Restored High	2004	2004-06-14	7	Manayunkia aestuarina	Polychaeta	16	6666.67
Restored High	2004	2004-06-14	7	Spionidae	Polychaeta	6	2500
Restored High	2004	2004-06-14	7	Americorophium spinicorne	Amphipoda	27	11250
Restored Low	2004	2004-06-14	1	Oligochaeta	Oligochaeta	17	7083.33
Restored Low	2004	2004-06-14	1	Americorophium salmonis	Amphipoda	3	1250
Restored Low	2004	2004-06-14	1	Monocorophium insidiosum	Amphipoda	1	416.667
Restored Low	2004	2004-06-14	1	Corophiidae	Amphipoda	17	7083.33
Restored Low	2004	2004-06-14	1	Americorophium spinicorne	Amphipoda	1	416.667
Restored Low	2004	2004-06-14	1	Eogammarus confervicolus	Amphipoda	4	1666.67
Restored Low	2004	2004-06-14	1	Turbellaria	Turbellaria	1	416.667
Restored Low	2004	2004-06-14	1	Chironomidae larva	Insecta larva	1	416.667
Restored Low	2004	2004-06-14	1	Nematoda	Nematoda	3	1250
Restored Low	2004	2004-06-14	1	Cumella vulgaris	Cumacea	20	8333.33
Restored Low	2004	2004-06-14	2	Corophiidae	Amphipoda	11	4583.33
Restored Low	2004	2004-06-14	2	Macoma spp.	Bivalvia	1	416.667
Restored Low	2004	2004-06-14	2	Nereididae	Polychaeta	1	416.667
Restored Low	2004	2004-06-14	2	Americorophium spinicorne	Amphipoda	3	1250
Restored Low	2004	2004-06-14	2	Phyllodocidae	Polychaeta	1	416.667
Restored Low	2004	2004-06-14	2	Oligochaeta	Oligochaeta	9	3750
Restored Low	2004	2004-06-14	3	Nematoda	Nematoda	1	416.667
Restored Low	2004	2004-06-14	3	Oligochaeta	Oligochaeta	5	2083.33
Restored Low	2004	2004-06-14	3	Corophiidae	Amphipoda	5	2083.33
Restored Low	2004	2004-06-14	3	Capitellidae	Polychaeta	2	833.333
Restored Low	2004	2004-06-14	3	Americorophium spinicorne	Amphipoda	1	416.667
Restored Low	2004	2004-06-14	4	Oligochaeta	Oligochaeta	8	3333.33
Restored Low	2004	2004-06-14	4	Nematoda	Nematoda	3	1250
Restored Low	2004	2004-06-14	4	Corophiidae	Amphipoda	4	1666.67
Restored Low	2004	2004-06-14	4	Americorophium salmonis	Amphipoda	1	416.667
Restored Low	2004	2004-06-14	5	Monocorophium insidiosum	Amphipoda	1	416.667
Restored Low	2004	2004-06-14	5	Nematoda	Nematoda	1	416.667
Restored Low	2004	2004-06-14	5	Glyceridae	Polychaeta	1	416.667
Restored Low	2004	2004-06-14	5	Cumella vulgaris	Cumacea	1	416.667
Restored Low	2004	2004-06-14	5	Corophiidae	Amphipoda	9	3750
Restored Low	2004	2004-06-14	5	Americorophium spinicorne	Amphipoda	1	416.667
Restored Low	2004	2004-06-14	5	Oligochaeta	Oligochaeta	27	11250
Restored Low	2004	2004-06-14	6	Nereididae	Polychaeta	1	416.667
Restored Low	2004	2004-06-14	6	Oligochaeta	Oligochaeta	21	8750
Restored Low	2004	2004-06-14	6	Cumella vulgaris	Cumacea	7	2916.67
Restored Low	2004	2004-06-14	6	Monocorophium insidiosum	Amphipoda	3	1250
Restored Low	2004	2004-06-14	6	Corophiidae	Amphipoda	21	8750
Restored Low	2004	2004-06-14	6	Americorophium spinicorne	Amphipoda	3	1250
Restored Low	2004	2004-06-14	6	Eogammarus confervicolus	Amphipoda	2	833.333
Restored Low	2004	2004-06-14	6	Capitellidae	Polychaeta	1	416.667
Restored Low	2004	2004-06-14	6	Nematoda	Nematoda	1	416.667
Restored Low	2004	2004-06-14	7	Eogammarus confervicolus	Amphipoda	1	416.667
Restored Low	2004	2004-06-14	7	Corophiidae	Amphipoda	21	8750
Restored Low	2004	2004-06-14	7	Cumella vulgaris	Cumacea	6	2500
Restored Low	2004	2004-06-14	7	Americorophium spinicorne	Amphipoda	6	2500
Restored Low	2004	2004-06-14	7	Chironomidae larva	Insecta larva	1	416.667
Restored Low	2004	2004-06-14	7	Nereididae	Polychaeta	1	416.667
Restored Low	2004	2004-06-14	7	Monocorophium insidiosum	Amphipoda	2	833.333
Restored Low	2004	2004-06-14	7	Nematoda	Nematoda	1	416.667
Restored Low	2004	2004-06-14	7	Oligochaeta	Oligochaeta	16	6666.67
Reference High	2004	2004-06-14	1	Oligochaeta	Oligochaeta	29	12083.3
Reference High	2004	2004-06-14	1	Sinelobus stanfordi	Tanaidacea	4	1666.67
Reference High	2004	2004-06-14	1	Eogammarus confervicolus	Amphipoda	8	3333.33
Reference High	2004	2004-06-14	1	Americorophium spinicorne	Amphipoda	34	14166.7
Reference High	2004	2004-06-14	1	Corophiidae	Amphipoda	70	29166.7
Reference High	2004	2004-06-14	1	Chironomidae larva	Insecta larva	8	3333.33
Reference High	2004	2004-06-14	1	Spionidae	Polychaeta	5	2083.33
Reference High	2004	2004-06-14	2	Eogammarus confervicolus	Amphipoda	37	15416.7
Reference High	2004	2004-06-14	2	Americorophium spinicorne	Amphipoda	23	9583.33
Reference High	2004	2004-06-14	2	Corophiidae	Amphipoda	40	16666.7
Reference High	2004	2004-06-14	2	Chironomidae larva	Insecta larva	7	2916.67
Reference High	2004	2004-06-14	2	Spionidae	Polychaeta	2	833.333
Reference High	2004	2004-06-14	2	Oligochaeta	Oligochaeta	40	16666.7
Reference High	2004	2004-06-14	2	Sinelobus stanfordi	Tanaidacea	3	1250
Reference High	2004	2004-06-14	3	Chironomidae larva	Insecta larva	16	6666.67
Reference High	2004	2004-06-14	3	Oligochaeta	Oligochaeta	96	40000
Reference High	2004	2004-06-14	3	Chironomidae pupa	Insecta larva	1	416.667
Reference High	2004	2004-06-14	3	Nematoda	Nematoda	1	416.667
Reference High	2004	2004-06-14	3	Corophiidae	Amphipoda	79	32916.7
Reference High	2004	2004-06-14	3	Americorophium spinicorne	Amphipoda	21	8750
Reference High	2004	2004-06-14	3	Eogammarus confervicolus	Amphipoda	14	5833.33
Reference High	2004	2004-06-14	3	Nereididae	Polychaeta	2	833.333
Reference High	2004	2004-06-14	3	Huntemannia jadensis	Harpacticoida	1	416.667
Reference High	2004	2004-06-14	3	Sinelobus stanfordi	Tanaidacea	3	1250
Reference High	2004	2004-06-14	3	Spionidae	Polychaeta	3	1250
Reference High	2004	2004-06-14	4	Manayunkia aestuarina	Polychaeta	1	416.667
Reference High	2004	2004-06-14	4	Eogammarus confervicolus	Amphipoda	3	1250
Reference High	2004	2004-06-14	4	Americorophium spinicorne	Amphipoda	28	11666.7
Reference High	2004	2004-06-14	4	Corophiidae	Amphipoda	90	37500
Reference High	2004	2004-06-14	4	Harpacticus spp. A	Harpacticoida	1	416.667
Reference High	2004	2004-06-14	4	Chironomidae larva	Insecta larva	5	2083.33
Reference High	2004	2004-06-14	4	Oligochaeta	Oligochaeta	41	17083.3
Reference High	2004	2004-06-14	4	Nematoda	Nematoda	5	2083.33
Reference High	2004	2004-06-14	4	Huntemannia jadensis	Harpacticoida	1	416.667
Reference High	2004	2004-06-14	4	Spionidae	Polychaeta	9	3750
Reference High	2004	2004-06-14	5	Eogammarus confervicolus	Amphipoda	65	27083.3
Reference High	2004	2004-06-14	5	Americorophium spinicorne	Amphipoda	43	17916.7
Reference High	2004	2004-06-14	5	Corophiidae	Amphipoda	86	35833.3
Reference High	2004	2004-06-14	5	Chironomidae larva	Insecta larva	5	2083.33
Reference High	2004	2004-06-14	5	Spionidae	Polychaeta	15	6250
Reference High	2004	2004-06-14	5	Oligochaeta	Oligochaeta	95	39583.3
Reference High	2004	2004-06-14	5	Nematoda	Nematoda	1	416.667
Reference High	2004	2004-06-14	6	Chironomidae larva	Insecta larva	10	4166.67
Reference High	2004	2004-06-14	6	Nematoda	Nematoda	1	416.667
Reference High	2004	2004-06-14	6	Oligochaeta	Oligochaeta	87	36250
Reference High	2004	2004-06-14	6	Spionidae	Polychaeta	12	5000
Reference High	2004	2004-06-14	6	Americorophium spinicorne	Amphipoda	38	15833.3
Reference High	2004	2004-06-14	6	Eogammarus confervicolus	Amphipoda	58	24166.7
Reference High	2004	2004-06-14	6	Manayunkia aestuarina	Polychaeta	1	416.667
Reference High	2004	2004-06-14	6	Corophiidae	Amphipoda	75	31250
Reference High	2004	2004-06-14	7	Chironomidae larva	Insecta larva	13	5416.67
Reference High	2004	2004-06-14	7	Nematoda	Nematoda	2	833.333
Reference High	2004	2004-06-14	7	Oligochaeta	Oligochaeta	91	37916.7
Reference High	2004	2004-06-14	7	Spionidae	Polychaeta	11	4583.33
Reference High	2004	2004-06-14	7	Corophiidae	Amphipoda	79	32916.7
Reference High	2004	2004-06-14	7	Americorophium spinicorne	Amphipoda	41	17083.3
Reference High	2004	2004-06-14	7	Eogammarus confervicolus	Amphipoda	49	20416.7
Reference High	2004	2004-06-14	7	Sinelobus stanfordi	Tanaidacea	1	416.667
Reference Low	2004	2004-06-14	1	Nematoda	Nematoda	2	833.333
Reference Low	2004	2004-06-14	1	Oligochaeta	Oligochaeta	32	13333.3
Reference Low	2004	2004-06-14	1	Cumella vulgaris	Cumacea	5	2083.33
Reference Low	2004	2004-06-14	1	Ampithoe spp.	Amphipoda	1	416.667
Reference Low	2004	2004-06-14	1	Chironomidae larva	Insecta larva	3	1250
Reference Low	2004	2004-06-14	1	Phyllodocidae	Polychaeta	1	416.667
Reference Low	2004	2004-06-14	1	Corophiidae	Amphipoda	41	17083.3
Reference Low	2004	2004-06-14	1	Turbellaria	Turbellaria	5	2083.33
Reference Low	2004	2004-06-14	1	Monocorophium insidiosum	Amphipoda	4	1666.67
Reference Low	2004	2004-06-14	1	Americorophium salmonis	Amphipoda	12	5000
Reference Low	2004	2004-06-14	2	Capitellidae	Polychaeta	1	416.667
Reference Low	2004	2004-06-14	2	Nematoda	Nematoda	2	833.333
Reference Low	2004	2004-06-14	2	Oligochaeta	Oligochaeta	41	17083.3
Reference Low	2004	2004-06-14	2	Cumella vulgaris	Cumacea	6	2500
Reference Low	2004	2004-06-14	2	Turbellaria	Turbellaria	2	833.333
Reference Low	2004	2004-06-14	2	Phyllodocidae	Polychaeta	1	416.667
Reference Low	2004	2004-06-14	2	Ampithoe spp.	Amphipoda	1	416.667
Reference Low	2004	2004-06-14	2	Corophiidae	Amphipoda	35	14583.3
Reference Low	2004	2004-06-14	2	Anthozoa	Anthozoa	1	416.667
Reference Low	2004	2004-06-14	2	Chironomidae larva	Insecta larva	2	833.333
Reference Low	2004	2004-06-14	2	Americorophium salmonis	Amphipoda	10	4166.67
Reference Low	2004	2004-06-14	2	Monocorophium insidiosum	Amphipoda	1	416.667
Reference Low	2004	2004-06-14	2	Polychaeta	Polychaeta	2	833.333
Reference Low	2004	2004-06-14	3	Corophiidae	Amphipoda	42	17500
Reference Low	2004	2004-06-14	3	Americorophium salmonis	Amphipoda	7	2916.67
Reference Low	2004	2004-06-14	3	Nematoda	Nematoda	1	416.667
Reference Low	2004	2004-06-14	3	Cumella vulgaris	Cumacea	3	1250
Reference Low	2004	2004-06-14	3	Ampithoe spp.	Amphipoda	1	416.667
Reference Low	2004	2004-06-14	3	Oligochaeta	Oligochaeta	40	16666.7
Reference Low	2004	2004-06-14	3	Glyceridae	Polychaeta	1	416.667
Reference Low	2004	2004-06-14	3	Chironomidae larva	Insecta larva	4	1666.67
Reference Low	2004	2004-06-14	3	Monocorophium insidiosum	Amphipoda	2	833.333
Reference Low	2004	2004-06-14	3	Polychaeta	Polychaeta	1	416.667
Reference Low	2004	2004-06-14	4	Americorophium salmonis	Amphipoda	6	2500
Reference Low	2004	2004-06-14	4	Chironomidae larva	Insecta larva	4	1666.67
Reference Low	2004	2004-06-14	4	Anthozoa	Anthozoa	2	833.333
Reference Low	2004	2004-06-14	4	Corophiidae	Amphipoda	47	19583.3
Reference Low	2004	2004-06-14	4	Cumella vulgaris	Cumacea	4	1666.67
Reference Low	2004	2004-06-14	4	Nematoda	Nematoda	2	833.333
Reference Low	2004	2004-06-14	4	Monocorophium insidiosum	Amphipoda	1	416.667
Reference Low	2004	2004-06-14	4	Capitellidae	Polychaeta	2	833.333
Reference Low	2004	2004-06-14	4	Turbellaria	Turbellaria	1	416.667
Reference Low	2004	2004-06-14	4	Oligochaeta	Oligochaeta	46	19166.7
Reference Low	2004	2004-06-14	5	Sinelobus stanfordi	Tanaidacea	1	416.667
Reference Low	2004	2004-06-14	5	Corophiidae	Amphipoda	36	15000
Reference Low	2004	2004-06-14	5	Ampithoe spp.	Amphipoda	1	416.667
Reference Low	2004	2004-06-14	5	Eogammarus confervicolus	Amphipoda	1	416.667
Reference Low	2004	2004-06-14	5	Turbellaria	Turbellaria	8	3333.33
Reference Low	2004	2004-06-14	5	Cumella vulgaris	Cumacea	4	1666.67
Reference Low	2004	2004-06-14	5	Oligochaeta	Oligochaeta	61	25416.7
Reference Low	2004	2004-06-14	5	Nematoda	Nematoda	1	416.667
Reference Low	2004	2004-06-14	5	Phyllodocidae	Polychaeta	2	833.333
Reference Low	2004	2004-06-14	5	Americorophium salmonis	Amphipoda	11	4583.33
Reference Low	2004	2004-06-14	5	Monocorophium insidiosum	Amphipoda	2	833.333
Reference Low	2004	2004-06-14	5	Chironomidae larva	Insecta larva	2	833.333
Reference Low	2004	2004-06-14	6	Turbellaria	Turbellaria	7	2916.67
Reference Low	2004	2004-06-14	6	Spionidae	Polychaeta	1	416.667
Reference Low	2004	2004-06-14	6	Monocorophium acherusicum	Amphipoda	1	416.667
Reference Low	2004	2004-06-14	6	Monocorophium insidiosum	Amphipoda	7	2916.67
Reference Low	2004	2004-06-14	6	Chironomidae larva	Insecta larva	1	416.667
Reference Low	2004	2004-06-14	6	Anthozoa	Anthozoa	1	416.667
Reference Low	2004	2004-06-14	6	Corophiidae	Amphipoda	49	20416.7
Reference Low	2004	2004-06-14	6	Phyllodocidae	Polychaeta	1	416.667
Reference Low	2004	2004-06-14	6	Ampithoe spp.	Amphipoda	1	416.667
Reference Low	2004	2004-06-14	6	Eogammarus confervicolus	Amphipoda	6	2500
Reference Low	2004	2004-06-14	6	Americorophium salmonis	Amphipoda	11	4583.33
Reference Low	2004	2004-06-14	6	Cumella vulgaris	Cumacea	2	833.333
Reference Low	2004	2004-06-14	6	Nematoda	Nematoda	3	1250
Reference Low	2004	2004-06-14	6	Capitellidae	Polychaeta	2	833.333
Reference Low	2004	2004-06-14	6	Oligochaeta	Oligochaeta	49	20416.7
Reference Low	2004	2004-06-14	7	Nematoda	Nematoda	3	1250
Reference Low	2004	2004-06-14	7	Oligochaeta	Oligochaeta	63	26250
Reference Low	2004	2004-06-14	7	Spionidae	Polychaeta	1	416.667
Reference Low	2004	2004-06-14	7	Cumella vulgaris	Cumacea	2	833.333
Reference Low	2004	2004-06-14	7	Turbellaria	Turbellaria	10	4166.67
Reference Low	2004	2004-06-14	7	Anthozoa	Anthozoa	2	833.333
Reference Low	2004	2004-06-14	7	Americorophium salmonis	Amphipoda	11	4583.33
Reference Low	2004	2004-06-14	7	Capitellidae	Polychaeta	1	416.667
Reference Low	2004	2004-06-14	7	Chironomidae larva	Insecta larva	1	416.667
Reference Low	2004	2004-06-14	7	Monocorophium insidiosum	Amphipoda	3	1250
Restored High	2004	2004-06-21	1	Chironomidae larva	Insecta larva	3	1250
Restored High	2004	2004-06-21	1	Spionidae	Polychaeta	14	5833.33
Restored High	2004	2004-06-21	1	Oligochaeta	Oligochaeta	39	16250
Restored High	2004	2004-06-21	1	Nematoda	Nematoda	2	833.333
Restored High	2004	2004-06-21	1	Diptera larva	Insecta larva	1	416.667
Restored High	2004	2004-06-21	1	Harpacticus spp. A	Harpacticoida	3	1250
Restored High	2004	2004-06-21	1	Corophiidae	Amphipoda	22	9166.67
Restored High	2004	2004-06-21	1	Americorophium spinicorne	Amphipoda	36	15000
Restored High	2004	2004-06-21	1	Sinelobus stanfordi	Tanaidacea	1	416.667
Restored High	2004	2004-06-21	1	Manayunkia aestuarina	Polychaeta	16	6666.67
Restored High	2004	2004-06-21	2	Nematoda	Nematoda	2	833.333
Restored High	2004	2004-06-21	2	Oligochaeta	Oligochaeta	32	13333.3
Restored High	2004	2004-06-21	2	Spionidae	Polychaeta	14	5833.33
Restored High	2004	2004-06-21	2	Manayunkia aestuarina	Polychaeta	9	3750
Restored High	2004	2004-06-21	2	Chironomidae larva	Insecta larva	3	1250
Restored High	2004	2004-06-21	2	Harpacticus spp. A	Harpacticoida	5	2083.33
Restored High	2004	2004-06-21	2	Corophiidae	Amphipoda	38	15833.3
Restored High	2004	2004-06-21	2	Americorophium spinicorne	Amphipoda	24	10000
Restored High	2004	2004-06-21	3	Laophontidae	Harpacticoida	1	416.667
Restored High	2004	2004-06-21	3	Oligochaeta	Oligochaeta	36	15000
Restored High	2004	2004-06-21	3	Nematoda	Nematoda	1	416.667
Restored High	2004	2004-06-21	3	Ampithoe spp.	Amphipoda	1	416.667
Restored High	2004	2004-06-21	3	Americorophium spinicorne	Amphipoda	22	9166.67
Restored High	2004	2004-06-21	3	Corophiidae	Amphipoda	41	17083.3
Restored High	2004	2004-06-21	3	Harpacticus spp. A	Harpacticoida	3	1250
Restored High	2004	2004-06-21	3	Manayunkia aestuarina	Polychaeta	11	4583.33
Restored High	2004	2004-06-21	3	Chironomidae larva	Insecta larva	5	2083.33
Restored High	2004	2004-06-21	3	Spionidae	Polychaeta	3	1250
Restored High	2004	2004-06-21	3	Diptera larva	Insecta larva	1	416.667
Restored High	2004	2004-06-21	4	Chironomidae larva	Insecta larva	3	1250
Restored High	2004	2004-06-21	4	Oligochaeta	Oligochaeta	19	7916.67
Restored High	2004	2004-06-21	4	Spionidae	Polychaeta	8	3333.33
Restored High	2004	2004-06-21	4	Chironomidae pupa	Insecta larva	1	416.667
Restored High	2004	2004-06-21	4	Harpacticus spp. A	Harpacticoida	2	833.333
Restored High	2004	2004-06-21	4	Corophiidae	Amphipoda	24	10000
Restored High	2004	2004-06-21	4	Americorophium spinicorne	Amphipoda	18	7500
Restored High	2004	2004-06-21	4	Eogammarus confervicolus	Amphipoda	3	1250
Restored High	2004	2004-06-21	4	Manayunkia aestuarina	Polychaeta	1	416.667
Restored High	2004	2004-06-21	5	Eogammarus confervicolus	Amphipoda	2	833.333
Restored High	2004	2004-06-21	5	Manayunkia aestuarina	Polychaeta	3	1250
Restored High	2004	2004-06-21	5	Spionidae	Polychaeta	10	4166.67
Restored High	2004	2004-06-21	5	Oligochaeta	Oligochaeta	31	12916.7
Restored High	2004	2004-06-21	5	Harpacticus spp. A	Harpacticoida	4	1666.67
Restored High	2004	2004-06-21	5	Corophiidae	Amphipoda	22	9166.67
Restored High	2004	2004-06-21	5	Amphipoda	Amphipoda	1	416.667
Restored High	2004	2004-06-21	5	Chironomidae larva	Insecta larva	2	833.333
Restored High	2004	2004-06-21	5	Americorophium spinicorne	Amphipoda	15	6250
Restored High	2004	2004-06-21	6	Nematoda	Nematoda	1	416.667
Restored High	2004	2004-06-21	6	Americorophium spinicorne	Amphipoda	35	14583.3
Restored High	2004	2004-06-21	6	Spionidae	Polychaeta	6	2500
Restored High	2004	2004-06-21	6	Manayunkia aestuarina	Polychaeta	13	5416.67
Restored High	2004	2004-06-21	6	Oligochaeta	Oligochaeta	41	17083.3
Restored High	2004	2004-06-21	6	Amphipoda	Amphipoda	1	416.667
Restored High	2004	2004-06-21	6	Eogammarus confervicolus	Amphipoda	7	2916.67
Restored High	2004	2004-06-21	6	Chironomidae larva	Insecta larva	4	1666.67
Restored High	2004	2004-06-21	6	Harpacticus spp. A	Harpacticoida	3	1250
Restored High	2004	2004-06-21	6	Corophiidae	Amphipoda	32	13333.3
Restored High	2004	2004-06-21	7	Amphipoda	Amphipoda	1	416.667
Restored High	2004	2004-06-21	7	Eogammarus confervicolus	Amphipoda	15	6250
Restored High	2004	2004-06-21	7	Corophiidae	Amphipoda	27	11250
Restored High	2004	2004-06-21	7	Harpacticus spp. A	Harpacticoida	1	416.667
Restored High	2004	2004-06-21	7	Chironomidae larva	Insecta larva	1	416.667
Restored High	2004	2004-06-21	7	Manayunkia aestuarina	Polychaeta	17	7083.33
Restored High	2004	2004-06-21	7	Spionidae	Polychaeta	7	2916.67
Restored High	2004	2004-06-21	7	Oligochaeta	Oligochaeta	21	8750
Restored High	2004	2004-06-21	7	Diptera larva	Insecta larva	1	416.667
Restored High	2004	2004-06-21	7	Nematoda	Nematoda	1	416.667
Restored High	2004	2004-06-21	7	Americorophium spinicorne	Amphipoda	15	6250
Restored Low	2004	2004-06-21	1	Opheliidae	Polychaeta	1	416.667
Restored Low	2004	2004-06-21	1	Nematoda	Nematoda	10	4166.67
Restored Low	2004	2004-06-21	1	Oligochaeta	Oligochaeta	10	4166.67
Restored Low	2004	2004-06-21	1	Monocorophium acherusicum	Amphipoda	1	416.667
Restored Low	2004	2004-06-21	1	Corophiidae	Amphipoda	30	12500
Restored Low	2004	2004-06-21	1	Monocorophium insidiosum	Amphipoda	2	833.333
Restored Low	2004	2004-06-21	1	Cumella vulgaris	Cumacea	38	15833.3
Restored Low	2004	2004-06-21	2	Phyllodocidae	Polychaeta	1	416.667
Restored Low	2004	2004-06-21	2	Cumella vulgaris	Cumacea	39	16250
Restored Low	2004	2004-06-21	2	Nematoda	Nematoda	14	5833.33
Restored Low	2004	2004-06-21	2	Oligochaeta	Oligochaeta	33	13750
Restored Low	2004	2004-06-21	2	Corophiidae	Amphipoda	46	19166.7
Restored Low	2004	2004-06-21	2	Americorophium salmonis	Amphipoda	1	416.667
Restored Low	2004	2004-06-21	2	Eogammarus confervicolus	Amphipoda	2	833.333
Restored Low	2004	2004-06-21	2	Americorophium spinicorne	Amphipoda	2	833.333
Restored Low	2004	2004-06-21	3	Americorophium salmonis	Amphipoda	1	416.667
Restored Low	2004	2004-06-21	3	Nematoda	Nematoda	9	3750
Restored Low	2004	2004-06-21	3	Cumella vulgaris	Cumacea	30	12500
Restored Low	2004	2004-06-21	3	Monocorophium insidiosum	Amphipoda	2	833.333
Restored Low	2004	2004-06-21	3	Corophiidae	Amphipoda	41	17083.3
Restored Low	2004	2004-06-21	3	Goniadidae	Polychaeta	1	416.667
Restored Low	2004	2004-06-21	3	Oligochaeta	Oligochaeta	65	27083.3
Restored Low	2004	2004-06-21	4	Amphipoda	Amphipoda	1	416.667
Restored Low	2004	2004-06-21	4	Oligochaeta	Oligochaeta	17	7083.33
Restored Low	2004	2004-06-21	4	Cumella vulgaris	Cumacea	22	9166.67
Restored Low	2004	2004-06-21	4	Nematoda	Nematoda	2	833.333
Restored Low	2004	2004-06-21	4	Monocorophium insidiosum	Amphipoda	1	416.667
Restored Low	2004	2004-06-21	4	Americorophium spinicorne	Amphipoda	3	1250
Restored Low	2004	2004-06-21	4	Turbellaria	Turbellaria	1	416.667
Restored Low	2004	2004-06-21	4	Capitellidae	Polychaeta	3	1250
Restored Low	2004	2004-06-21	4	Corophiidae	Amphipoda	9	3750
Restored Low	2004	2004-06-21	5	Nematoda	Nematoda	4	1666.67
Restored Low	2004	2004-06-21	5	Nereididae	Polychaeta	1	416.667
Restored Low	2004	2004-06-21	5	Turbellaria	Turbellaria	1	416.667
Restored Low	2004	2004-06-21	5	Eogammarus confervicolus	Amphipoda	1	416.667
Restored Low	2004	2004-06-21	5	Americorophium spinicorne	Amphipoda	4	1666.67
Restored Low	2004	2004-06-21	5	Americorophium salmonis	Amphipoda	2	833.333
Restored Low	2004	2004-06-21	5	Monocorophium insidiosum	Amphipoda	1	416.667
Restored Low	2004	2004-06-21	5	Cumella vulgaris	Cumacea	35	14583.3
Restored Low	2004	2004-06-21	5	Oligochaeta	Oligochaeta	95	39583.3
Restored Low	2004	2004-06-21	5	Corophiidae	Amphipoda	39	16250
Restored Low	2004	2004-06-21	6	Opheliidae	Polychaeta	1	416.667
Restored Low	2004	2004-06-21	6	Cumella vulgaris	Cumacea	31	12916.7
Restored Low	2004	2004-06-21	6	Oligochaeta	Oligochaeta	72	30000
Restored Low	2004	2004-06-21	6	Nematoda	Nematoda	5	2083.33
Restored Low	2004	2004-06-21	6	Corophiidae	Amphipoda	28	11666.7
Restored Low	2004	2004-06-21	6	Americorophium spinicorne	Amphipoda	4	1666.67
Restored Low	2004	2004-06-21	6	Americorophium salmonis	Amphipoda	1	416.667
Restored Low	2004	2004-06-21	7	Polychaeta	Polychaeta	1	416.667
Restored Low	2004	2004-06-21	7	Nematoda	Nematoda	9	3750
Restored Low	2004	2004-06-21	7	Oligochaeta	Oligochaeta	44	18333.3
Restored Low	2004	2004-06-21	7	Cumella vulgaris	Cumacea	12	5000
Restored Low	2004	2004-06-21	7	Polychaeta	Polychaeta	1	416.667
Restored Low	2004	2004-06-21	7	Opheliidae	Polychaeta	9	3750
Restored Low	2004	2004-06-21	7	Corophiidae	Amphipoda	10	4166.67
Reference High	2004	2004-06-21	1	Nereididae	Polychaeta	1	416.667
Reference High	2004	2004-06-21	1	Americorophium spinicorne	Amphipoda	41	17083.3
Reference High	2004	2004-06-21	1	Corophiidae	Amphipoda	41	17083.3
Reference High	2004	2004-06-21	1	Ampithoe spp.	Amphipoda	5	2083.33
Reference High	2004	2004-06-21	1	Amphipoda	Amphipoda	2	833.333
Reference High	2004	2004-06-21	1	Harpacticus spp. A	Harpacticoida	1	416.667
Reference High	2004	2004-06-21	1	Chironomidae larva	Insecta larva	5	2083.33
Reference High	2004	2004-06-21	1	Manayunkia aestuarina	Polychaeta	2	833.333
Reference High	2004	2004-06-21	1	Spionidae	Polychaeta	16	6666.67
Reference High	2004	2004-06-21	1	Oligochaeta	Oligochaeta	46	19166.7
Reference High	2004	2004-06-21	1	Nematoda	Nematoda	5	2083.33
Reference High	2004	2004-06-21	1	Eogammarus confervicolus	Amphipoda	53	22083.3
Reference High	2004	2004-06-21	1	Phyllodocidae	Polychaeta	1	416.667
Reference High	2004	2004-06-21	2	Gnorimosphaeroma oregonense	Isopoda	3	1250
Reference High	2004	2004-06-21	2	Nematoda	Nematoda	3	1250
Reference High	2004	2004-06-21	2	Oligochaeta	Oligochaeta	61	25416.7
Reference High	2004	2004-06-21	2	Spionidae	Polychaeta	2	833.333
Reference High	2004	2004-06-21	2	Manayunkia aestuarina	Polychaeta	1	416.667
Reference High	2004	2004-06-21	2	Chironomidae larva	Insecta larva	13	5416.67
Reference High	2004	2004-06-21	2	Corophiidae	Amphipoda	38	15833.3
Reference High	2004	2004-06-21	2	Americorophium spinicorne	Amphipoda	28	11666.7
Reference High	2004	2004-06-21	2	Amphipoda	Amphipoda	4	1666.67
Reference High	2004	2004-06-21	2	Eogammarus confervicolus	Amphipoda	32	13333.3
Reference High	2004	2004-06-21	2	Sinelobus stanfordi	Tanaidacea	3	1250
Reference High	2004	2004-06-21	2	Ampithoe spp.	Amphipoda	2	833.333
Reference High	2004	2004-06-21	3	Nematoda	Nematoda	9	3750
Reference High	2004	2004-06-21	3	Oligochaeta	Oligochaeta	73	30416.7
Reference High	2004	2004-06-21	3	Chironomidae larva	Insecta larva	6	2500
Reference High	2004	2004-06-21	3	Corophiidae	Amphipoda	47	19583.3
Reference High	2004	2004-06-21	3	Americorophium spinicorne	Amphipoda	47	19583.3
Reference High	2004	2004-06-21	3	Eogammarus confervicolus	Amphipoda	2	833.333
Reference High	2004	2004-06-21	3	Huntemannia jadensis	Harpacticoida	1	416.667
Reference High	2004	2004-06-21	3	Sinelobus stanfordi	Tanaidacea	1	416.667
Reference High	2004	2004-06-21	4	Corophiidae	Amphipoda	30	12500
Reference High	2004	2004-06-21	4	Nereididae	Polychaeta	1	416.667
Reference High	2004	2004-06-21	4	Sinelobus stanfordi	Tanaidacea	2	833.333
Reference High	2004	2004-06-21	4	Nematoda	Nematoda	4	1666.67
Reference High	2004	2004-06-21	4	Chironomidae larva	Insecta larva	3	1250
Reference High	2004	2004-06-21	4	Americorophium spinicorne	Amphipoda	27	11250
Reference High	2004	2004-06-21	4	Oligochaeta	Oligochaeta	85	35416.7
Reference High	2004	2004-06-21	4	Eogammarus confervicolus	Amphipoda	1	416.667
Reference High	2004	2004-06-21	5	Chironomidae larva	Insecta larva	8	3333.33
Reference High	2004	2004-06-21	5	Nematoda	Nematoda	7	2916.67
Reference High	2004	2004-06-21	5	Corophiidae	Amphipoda	68	28333.3
Reference High	2004	2004-06-21	5	Oligochaeta	Oligochaeta	77	32083.3
Reference High	2004	2004-06-21	5	Americorophium spinicorne	Amphipoda	36	15000
Reference High	2004	2004-06-21	5	Eogammarus confervicolus	Amphipoda	1	416.667
Reference High	2004	2004-06-21	6	Americorophium spinicorne	Amphipoda	24	10000
Reference High	2004	2004-06-21	6	Corophiidae	Amphipoda	51	21250
Reference High	2004	2004-06-21	6	Chironomidae larva	Insecta larva	7	2916.67
Reference High	2004	2004-06-21	6	Oligochaeta	Oligochaeta	89	37083.3
Reference High	2004	2004-06-21	6	Nematoda	Nematoda	10	4166.67
Reference High	2004	2004-06-21	6	Sinelobus stanfordi	Tanaidacea	1	416.667
Reference High	2004	2004-06-21	6	Eogammarus confervicolus	Amphipoda	3	1250
Reference High	2004	2004-06-21	7	Corophiidae	Amphipoda	45	18750
Reference High	2004	2004-06-21	7	Nematoda	Nematoda	6	2500
Reference High	2004	2004-06-21	7	Americorophium spinicorne	Amphipoda	26	10833.3
Reference High	2004	2004-06-21	7	Oligochaeta	Oligochaeta	61	25416.7
Reference High	2004	2004-06-21	7	Chironomidae larva	Insecta larva	5	2083.33
Reference High	2004	2004-06-21	7	Eogammarus confervicolus	Amphipoda	1	416.667
Reference High	2004	2004-06-21	7	Manayunkia aestuarina	Polychaeta	1	416.667
Reference High	2004	2004-06-21	7	Spionidae	Polychaeta	4	1666.67
Reference High	2004	2004-06-21	7	Harpacticus spp. A	Harpacticoida	1	416.667
Reference Low	2004	2004-06-21	1	Americorophium spinicorne	Amphipoda	1	416.667
Reference Low	2004	2004-06-21	1	Oligochaeta	Oligochaeta	95	39583.3
Reference Low	2004	2004-06-21	1	Corophiidae	Amphipoda	36	15000
Reference Low	2004	2004-06-21	1	Cumella vulgaris	Cumacea	30	12500
Reference Low	2004	2004-06-21	1	Nematoda	Nematoda	3	1250
Reference Low	2004	2004-06-21	1	Monocorophium acherusicum	Amphipoda	2	833.333
Reference Low	2004	2004-06-21	1	Americorophium salmonis	Amphipoda	5	2083.33
Reference Low	2004	2004-06-21	1	Monocorophium insidiosum	Amphipoda	1	416.667
Reference Low	2004	2004-06-21	2	Cumella vulgaris	Cumacea	24	10000
Reference Low	2004	2004-06-21	2	Chironomidae larva	Insecta larva	1	416.667
Reference Low	2004	2004-06-21	2	Nematoda	Nematoda	7	2916.67
Reference Low	2004	2004-06-21	2	Americorophium salmonis	Amphipoda	7	2916.67
Reference Low	2004	2004-06-21	2	Monocorophium insidiosum	Amphipoda	1	416.667
Reference Low	2004	2004-06-21	2	Corophiidae	Amphipoda	26	10833.3
Reference Low	2004	2004-06-21	2	Monocorophium acherusicum	Amphipoda	2	833.333
Reference Low	2004	2004-06-21	2	Turbellaria	Turbellaria	15	6250
Reference Low	2004	2004-06-21	2	Ampithoe spp.	Amphipoda	1	416.667
Reference Low	2004	2004-06-21	2	Oligochaeta	Oligochaeta	65	27083.3
Reference Low	2004	2004-06-21	2	Manayunkia speciosa	Polychaeta	1	416.667
Reference Low	2004	2004-06-21	3	Glyceridae	Polychaeta	1	416.667
Reference Low	2004	2004-06-21	3	Nematoda	Nematoda	3	1250
Reference Low	2004	2004-06-21	3	Cumella vulgaris	Cumacea	30	12500
Reference Low	2004	2004-06-21	3	Capitellidae	Polychaeta	1	416.667
Reference Low	2004	2004-06-21	3	Amphipoda	Amphipoda	1	416.667
Reference Low	2004	2004-06-21	3	Americorophium salmonis	Amphipoda	9	3750
Reference Low	2004	2004-06-21	3	Manayunkia speciosa	Polychaeta	1	416.667
Reference Low	2004	2004-06-21	3	Turbellaria	Turbellaria	1	416.667
Reference Low	2004	2004-06-21	3	Corophiidae	Amphipoda	42	17500
Reference Low	2004	2004-06-21	3	Monocorophium insidiosum	Amphipoda	2	833.333
Reference Low	2004	2004-06-21	3	Oligochaeta	Oligochaeta	43	17916.7
Reference Low	2004	2004-06-21	4	Chironomidae larva	Insecta larva	1	416.667
Reference Low	2004	2004-06-21	4	Corophiidae	Amphipoda	24	10000
Reference Low	2004	2004-06-21	4	Cumella vulgaris	Cumacea	21	8750
Reference Low	2004	2004-06-21	4	Phyllodocidae	Polychaeta	1	416.667
Reference Low	2004	2004-06-21	4	Monocorophium insidiosum	Amphipoda	5	2083.33
Reference Low	2004	2004-06-21	4	Americorophium salmonis	Amphipoda	5	2083.33
Reference Low	2004	2004-06-21	4	Turbellaria	Turbellaria	5	2083.33
Reference Low	2004	2004-06-21	4	Nematoda	Nematoda	4	1666.67
Reference Low	2004	2004-06-21	4	Ampithoe spp.	Amphipoda	1	416.667
Reference Low	2004	2004-06-21	4	Oligochaeta	Oligochaeta	41	17083.3
Reference Low	2004	2004-06-21	4	Capitellidae	Polychaeta	1	416.667
Reference Low	2004	2004-06-21	5	Eogammarus confervicolus	Amphipoda	2	833.333
Reference Low	2004	2004-06-21	5	Nematoda	Nematoda	5	2083.33
Reference Low	2004	2004-06-21	5	Cumella vulgaris	Cumacea	32	13333.3
Reference Low	2004	2004-06-21	5	Americorophium salmonis	Amphipoda	10	4166.67
Reference Low	2004	2004-06-21	5	Corophiidae	Amphipoda	42	17500
Reference Low	2004	2004-06-21	5	Turbellaria	Turbellaria	6	2500
Reference Low	2004	2004-06-21	5	Oligochaeta	Oligochaeta	49	20416.7
Reference Low	2004	2004-06-21	6	Oligochaeta	Oligochaeta	53	22083.3
Reference Low	2004	2004-06-21	6	Polychaeta	Polychaeta	1	416.667
Reference Low	2004	2004-06-21	6	Nematoda	Nematoda	4	1666.67
Reference Low	2004	2004-06-21	6	Cumella vulgaris	Cumacea	14	5833.33
Reference Low	2004	2004-06-21	6	Americorophium salmonis	Amphipoda	14	5833.33
Reference Low	2004	2004-06-21	6	Monocorophium insidiosum	Amphipoda	4	1666.67
Reference Low	2004	2004-06-21	6	Corophiidae	Amphipoda	58	24166.7
Reference Low	2004	2004-06-21	6	Turbellaria	Turbellaria	7	2916.67
Reference Low	2004	2004-06-21	7	Polychaeta	Polychaeta	2	833.333
Reference Low	2004	2004-06-21	7	Chironomidae larva	Insecta larva	2	833.333
Reference Low	2004	2004-06-21	7	Eogammarus confervicolus	Amphipoda	1	416.667
Reference Low	2004	2004-06-21	7	Oligochaeta	Oligochaeta	50	20833.3
Reference Low	2004	2004-06-21	7	Turbellaria	Turbellaria	8	3333.33
Reference Low	2004	2004-06-21	7	Corophiidae	Amphipoda	45	18750
Reference Low	2004	2004-06-21	7	Nematoda	Nematoda	4	1666.67
Reference Low	2004	2004-06-21	7	Phyllodocidae	Polychaeta	1	416.667
Reference Low	2004	2004-06-21	7	Cumella vulgaris	Cumacea	31	12916.7
Reference Low	2004	2004-06-21	7	Monocorophium insidiosum	Amphipoda	4	1666.67
Reference Low	2004	2004-06-21	7	Americorophium salmonis	Amphipoda	7	2916.67
Restored High	2004	2004-07-05	1	Harpacticus spp. A	Harpacticoida	3	1250
Restored High	2004	2004-07-05	1	Nematoda	Nematoda	2	833.333
Restored High	2004	2004-07-05	1	Oligochaeta	Oligochaeta	35	14583.3
Restored High	2004	2004-07-05	1	Spionidae	Polychaeta	7	2916.67
Restored High	2004	2004-07-05	1	Manayunkia aestuarina	Polychaeta	6	2500
Restored High	2004	2004-07-05	1	Corophiidae	Amphipoda	15	6250
Restored High	2004	2004-07-05	1	Americorophium spinicorne	Amphipoda	22	9166.67
Restored High	2004	2004-07-05	1	Ampithoe spp.	Amphipoda	1	416.667
Restored High	2004	2004-07-05	1	Eogammarus confervicolus	Amphipoda	3	1250
Restored High	2004	2004-07-05	2	Corophiidae	Amphipoda	13	5416.67
Restored High	2004	2004-07-05	2	Harpacticus spp. A	Harpacticoida	1	416.667
Restored High	2004	2004-07-05	2	Nematoda	Nematoda	1	416.667
Restored High	2004	2004-07-05	2	Oligochaeta	Oligochaeta	32	13333.3
Restored High	2004	2004-07-05	2	Manayunkia aestuarina	Polychaeta	9	3750
Restored High	2004	2004-07-05	2	Spionidae	Polychaeta	3	1250
Restored High	2004	2004-07-05	2	Eogammarus confervicolus	Amphipoda	4	1666.67
Restored High	2004	2004-07-05	2	Americorophium spinicorne	Amphipoda	23	9583.33
Restored High	2004	2004-07-05	2	Mytilidae	Bivalvia	1	416.667
Restored High	2004	2004-07-05	2	Sinelobus stanfordi	Tanaidacea	1	416.667
Restored High	2004	2004-07-05	3	Corophiidae	Amphipoda	28	11666.7
Restored High	2004	2004-07-05	3	Oligochaeta	Oligochaeta	37	15416.7
Restored High	2004	2004-07-05	3	Spionidae	Polychaeta	6	2500
Restored High	2004	2004-07-05	3	Manayunkia aestuarina	Polychaeta	10	4166.67
Restored High	2004	2004-07-05	3	Harpacticus spp. A	Harpacticoida	3	1250
Restored High	2004	2004-07-05	3	Nematoda	Nematoda	2	833.333
Restored High	2004	2004-07-05	3	Americorophium spinicorne	Amphipoda	33	13750
Restored High	2004	2004-07-05	3	Eogammarus confervicolus	Amphipoda	17	7083.33
Restored High	2004	2004-07-05	3	Chironomidae larva	Insecta larva	2	833.333
Restored High	2004	2004-07-05	4	Chironomidae larva	Insecta larva	3	1250
Restored High	2004	2004-07-05	4	Oligochaeta	Oligochaeta	39	16250
Restored High	2004	2004-07-05	4	Spionidae	Polychaeta	10	4166.67
Restored High	2004	2004-07-05	4	Nematoda	Nematoda	1	416.667
Restored High	2004	2004-07-05	4	Manayunkia aestuarina	Polychaeta	6	2500
Restored High	2004	2004-07-05	4	Harpacticus spp. A	Harpacticoida	2	833.333
Restored High	2004	2004-07-05	4	Corophiidae	Amphipoda	30	12500
Restored High	2004	2004-07-05	4	Eogammarus confervicolus	Amphipoda	7	2916.67
Restored High	2004	2004-07-05	4	Americorophium spinicorne	Amphipoda	34	14166.7
Restored High	2004	2004-07-05	5	Nematoda	Nematoda	4	1666.67
Restored High	2004	2004-07-05	5	Oligochaeta	Oligochaeta	39	16250
Restored High	2004	2004-07-05	5	Eogammarus confervicolus	Amphipoda	3	1250
Restored High	2004	2004-07-05	5	Americorophium spinicorne	Amphipoda	28	11666.7
Restored High	2004	2004-07-05	5	Corophiidae	Amphipoda	27	11250
Restored High	2004	2004-07-05	5	Harpacticus spp. A	Harpacticoida	1	416.667
Restored High	2004	2004-07-05	5	Chironomidae larva	Insecta larva	1	416.667
Restored High	2004	2004-07-05	5	Spionidae	Polychaeta	7	2916.67
Restored High	2004	2004-07-05	5	Manayunkia aestuarina	Polychaeta	4	1666.67
Restored High	2004	2004-07-05	6	Manayunkia aestuarina	Polychaeta	3	1250
Restored High	2004	2004-07-05	6	Spionidae	Polychaeta	3	1250
Restored High	2004	2004-07-05	6	Oligochaeta	Oligochaeta	11	4583.33
Restored High	2004	2004-07-05	6	Nematoda	Nematoda	1	416.667
Restored High	2004	2004-07-05	6	Corophiidae	Amphipoda	37	15416.7
Restored High	2004	2004-07-05	6	Americorophium spinicorne	Amphipoda	27	11250
Restored High	2004	2004-07-05	6	Harpacticus spp. A	Harpacticoida	1	416.667
Restored High	2004	2004-07-05	7	Harpacticus spp. A	Harpacticoida	2	833.333
Restored High	2004	2004-07-05	7	Sinelobus stanfordi	Tanaidacea	1	416.667
Restored High	2004	2004-07-05	7	Manayunkia aestuarina	Polychaeta	5	2083.33
Restored High	2004	2004-07-05	7	Corophiidae	Amphipoda	36	15000
Restored High	2004	2004-07-05	7	Nematoda	Nematoda	3	1250
Restored High	2004	2004-07-05	7	Oligochaeta	Oligochaeta	24	10000
Restored High	2004	2004-07-05	7	Spionidae	Polychaeta	14	5833.33
Restored High	2004	2004-07-05	7	Americorophium spinicorne	Amphipoda	42	17500
Restored Low	2004	2004-07-05	1	Americorophium salmonis	Amphipoda	1	416.667
Restored Low	2004	2004-07-05	1	Manayunkia speciosa	Polychaeta	1	416.667
Restored Low	2004	2004-07-05	1	Gnorimosphaeroma spp.	Isopoda	4	1666.67
Restored Low	2004	2004-07-05	1	Corophiidae	Amphipoda	19	7916.67
Restored Low	2004	2004-07-05	1	Cumella vulgaris	Cumacea	11	4583.33
Restored Low	2004	2004-07-05	1	Oligochaeta	Oligochaeta	4	1666.67
Restored Low	2004	2004-07-05	1	Nematoda	Nematoda	6	2500
Restored Low	2004	2004-07-05	1	Polychaeta	Polychaeta	1	416.667
Restored Low	2004	2004-07-05	2	Bivalvia	Bivalvia	1	416.667
Restored Low	2004	2004-07-05	2	Amphipoda	Amphipoda	1	416.667
Restored Low	2004	2004-07-05	2	Gnorimosphaeroma spp.	Isopoda	1	416.667
Restored Low	2004	2004-07-05	2	Corophiidae	Amphipoda	28	11666.7
Restored Low	2004	2004-07-05	2	Monocorophium insidiosum	Amphipoda	1	416.667
Restored Low	2004	2004-07-05	2	Americorophium salmonis	Amphipoda	4	1666.67
Restored Low	2004	2004-07-05	2	Cumella vulgaris	Cumacea	47	19583.3
Restored Low	2004	2004-07-05	2	Oligochaeta	Oligochaeta	5	2083.33
Restored Low	2004	2004-07-05	2	Nematoda	Nematoda	2	833.333
Restored Low	2004	2004-07-05	3	Nematoda	Nematoda	4	1666.67
Restored Low	2004	2004-07-05	3	Eogammarus confervicolus	Amphipoda	1	416.667
Restored Low	2004	2004-07-05	3	Cumella vulgaris	Cumacea	35	14583.3
Restored Low	2004	2004-07-05	3	Americorophium salmonis	Amphipoda	3	1250
Restored Low	2004	2004-07-05	3	Gnorimosphaeroma spp.	Isopoda	4	1666.67
Restored Low	2004	2004-07-05	3	Manayunkia speciosa	Polychaeta	1	416.667
Restored Low	2004	2004-07-05	3	Polychaeta	Polychaeta	1	416.667
Restored Low	2004	2004-07-05	3	Turbellaria	Turbellaria	1	416.667
Restored Low	2004	2004-07-05	3	Corophiidae	Amphipoda	37	15416.7
Restored Low	2004	2004-07-05	3	Oligochaeta	Oligochaeta	2	833.333
Restored Low	2004	2004-07-05	4	Cumella vulgaris	Cumacea	18	7500
Restored Low	2004	2004-07-05	4	Oligochaeta	Oligochaeta	17	7083.33
Restored Low	2004	2004-07-05	4	Nematoda	Nematoda	2	833.333
Restored Low	2004	2004-07-05	4	Amphipoda	Amphipoda	1	416.667
Restored Low	2004	2004-07-05	4	Corophiidae	Amphipoda	19	7916.67
Restored Low	2004	2004-07-05	4	Americorophium spinicorne	Amphipoda	1	416.667
Restored Low	2004	2004-07-05	4	Phyllodocidae	Polychaeta	2	833.333
Restored Low	2004	2004-07-05	4	Manayunkia speciosa	Polychaeta	1	416.667
Restored Low	2004	2004-07-05	5	Gnorimosphaeroma spp.	Isopoda	1	416.667
Restored Low	2004	2004-07-05	5	Capitellidae	Polychaeta	2	833.333
Restored Low	2004	2004-07-05	5	Eogammarus confervicolus	Amphipoda	1	416.667
Restored Low	2004	2004-07-05	5	Amphipoda	Amphipoda	1	416.667
Restored Low	2004	2004-07-05	5	Nematoda	Nematoda	3	1250
Restored Low	2004	2004-07-05	5	Oligochaeta	Oligochaeta	23	9583.33
Restored Low	2004	2004-07-05	5	Cumella vulgaris	Cumacea	34	14166.7
Restored Low	2004	2004-07-05	5	Corophiidae	Amphipoda	20	8333.33
Restored Low	2004	2004-07-05	6	Americorophium spinicorne	Amphipoda	2	833.333
Restored Low	2004	2004-07-05	6	Nematoda	Nematoda	2	833.333
Restored Low	2004	2004-07-05	6	Oligochaeta	Oligochaeta	7	2916.67
Restored Low	2004	2004-07-05	6	Cumella vulgaris	Cumacea	19	7916.67
Restored Low	2004	2004-07-05	6	Americorophium salmonis	Amphipoda	1	416.667
Restored Low	2004	2004-07-05	6	Gnorimosphaeroma spp.	Isopoda	5	2083.33
Restored Low	2004	2004-07-05	6	Eogammarus confervicolus	Amphipoda	1	416.667
Restored Low	2004	2004-07-05	6	Corophiidae	Amphipoda	28	11666.7
Restored Low	2004	2004-07-05	6	Monocorophium insidiosum	Amphipoda	1	416.667
Restored Low	2004	2004-07-05	7	Oligochaeta	Oligochaeta	14	5833.33
Restored Low	2004	2004-07-05	7	Corophiidae	Amphipoda	28	11666.7
Restored Low	2004	2004-07-05	7	Gnorimosphaeroma spp.	Isopoda	3	1250
Restored Low	2004	2004-07-05	7	Cumella vulgaris	Cumacea	22	9166.67
Restored Low	2004	2004-07-05	7	Amphipoda	Amphipoda	1	416.667
Restored Low	2004	2004-07-05	7	Nematoda	Nematoda	4	1666.67
Restored Low	2004	2004-07-05	7	Americorophium salmonis	Amphipoda	1	416.667
Restored Low	2004	2004-07-05	7	Americorophium spinicorne	Amphipoda	2	833.333
Reference High	2004	2004-07-05	1	Chironomidae larva	Insecta larva	1	416.667
Reference High	2004	2004-07-05	1	Harpacticus spp. A	Harpacticoida	1	416.667
Reference High	2004	2004-07-05	1	Corophiidae	Amphipoda	28	11666.7
Reference High	2004	2004-07-05	1	Americorophium spinicorne	Amphipoda	25	10416.7
Reference High	2004	2004-07-05	1	Eogammarus confervicolus	Amphipoda	1	416.667
Reference High	2004	2004-07-05	1	Laophontidae	Harpacticoida	1	416.667
Reference High	2004	2004-07-05	1	Nematoda	Nematoda	7	2916.67
Reference High	2004	2004-07-05	1	Spionidae	Polychaeta	35	14583.3
Reference High	2004	2004-07-05	1	Sinelobus stanfordi	Tanaidacea	1	416.667
Reference High	2004	2004-07-05	1	Oligochaeta	Oligochaeta	68	28333.3
Reference High	2004	2004-07-05	1	Phyllodocidae	Polychaeta	1	416.667
Reference High	2004	2004-07-05	2	Oligochaeta	Oligochaeta	81	33750
Reference High	2004	2004-07-05	2	Ampithoe spp.	Amphipoda	3	1250
Reference High	2004	2004-07-05	2	Eogammarus confervicolus	Amphipoda	5	2083.33
Reference High	2004	2004-07-05	2	Americorophium spinicorne	Amphipoda	30	12500
Reference High	2004	2004-07-05	2	Corophiidae	Amphipoda	26	10833.3
Reference High	2004	2004-07-05	2	Laophontidae	Harpacticoida	1	416.667
Reference High	2004	2004-07-05	2	Spionidae	Polychaeta	27	11250
Reference High	2004	2004-07-05	2	Nematoda	Nematoda	8	3333.33
Reference High	2004	2004-07-05	2	Chironomidae larva	Insecta larva	1	416.667
Reference High	2004	2004-07-05	2	Phyllodocidae	Polychaeta	1	416.667
Reference High	2004	2004-07-05	2	Monocorophium insidiosum	Amphipoda	4	1666.67
Reference High	2004	2004-07-05	2	Sinelobus stanfordi	Tanaidacea	2	833.333
Reference High	2004	2004-07-05	2	Cumella vulgaris	Cumacea	1	416.667
Reference High	2004	2004-07-05	3	Corophiidae	Amphipoda	24	10000
Reference High	2004	2004-07-05	3	Chironomidae larva	Insecta larva	34	14166.7
Reference High	2004	2004-07-05	3	Spionidae	Polychaeta	4	1666.67
Reference High	2004	2004-07-05	3	Oligochaeta	Oligochaeta	103	42916.7
Reference High	2004	2004-07-05	3	Nematoda	Nematoda	3	1250
Reference High	2004	2004-07-05	3	Americorophium spinicorne	Amphipoda	56	23333.3
Reference High	2004	2004-07-05	3	Phyllodocidae	Polychaeta	1	416.667
Reference High	2004	2004-07-05	3	Ampithoe spp.	Amphipoda	8	3333.33
Reference High	2004	2004-07-05	3	Eogammarus confervicolus	Amphipoda	8	3333.33
Reference High	2004	2004-07-05	3	Sinelobus stanfordi	Tanaidacea	7	2916.67
Reference High	2004	2004-07-05	4	Oligochaeta	Oligochaeta	89	37083.3
Reference High	2004	2004-07-05	4	Spionidae	Polychaeta	1	416.667
Reference High	2004	2004-07-05	4	Manayunkia aestuarina	Polychaeta	1	416.667
Reference High	2004	2004-07-05	4	Chironomidae larva	Insecta larva	8	3333.33
Reference High	2004	2004-07-05	4	Corophiidae	Amphipoda	45	18750
Reference High	2004	2004-07-05	4	Americorophium spinicorne	Amphipoda	52	21666.7
Reference High	2004	2004-07-05	4	Sinelobus stanfordi	Tanaidacea	3	1250
Reference High	2004	2004-07-05	4	Insecta larva	Insecta larva	1	416.667
Reference High	2004	2004-07-05	4	Turbellaria	Turbellaria	1	416.667
Reference High	2004	2004-07-05	4	Nematoda	Nematoda	5	2083.33
Reference High	2004	2004-07-05	5	Americorophium spinicorne	Amphipoda	46	19166.7
Reference High	2004	2004-07-05	5	Nematoda	Nematoda	4	1666.67
Reference High	2004	2004-07-05	5	Oligochaeta	Oligochaeta	79	32916.7
Reference High	2004	2004-07-05	5	Spionidae	Polychaeta	2	833.333
Reference High	2004	2004-07-05	5	Corophiidae	Amphipoda	26	10833.3
Reference High	2004	2004-07-05	5	Sinelobus stanfordi	Tanaidacea	2	833.333
Reference High	2004	2004-07-05	5	Ampithoe spp.	Amphipoda	2	833.333
Reference High	2004	2004-07-05	5	Chironomidae larva	Insecta larva	14	5833.33
Reference High	2004	2004-07-05	6	Chironomidae larva	Insecta larva	7	2916.67
Reference High	2004	2004-07-05	6	Monocorophium insidiosum	Amphipoda	3	1250
Reference High	2004	2004-07-05	6	Ampithoe spp.	Amphipoda	1	416.667
Reference High	2004	2004-07-05	6	Sinelobus stanfordi	Tanaidacea	5	2083.33
Reference High	2004	2004-07-05	6	Americorophium spinicorne	Amphipoda	31	12916.7
Reference High	2004	2004-07-05	6	Corophiidae	Amphipoda	10	4166.67
Reference High	2004	2004-07-05	6	Harpacticus spp. A	Harpacticoida	1	416.667
Reference High	2004	2004-07-05	6	Manayunkia aestuarina	Polychaeta	2	833.333
Reference High	2004	2004-07-05	6	Oligochaeta	Oligochaeta	89	37083.3
Reference High	2004	2004-07-05	6	Spionidae	Polychaeta	6	2500
Reference High	2004	2004-07-05	6	Nereididae	Polychaeta	1	416.667
Reference High	2004	2004-07-05	6	Nematoda	Nematoda	9	3750
Reference High	2004	2004-07-05	7	Nematoda	Nematoda	5	2083.33
Reference High	2004	2004-07-05	7	Monocorophium insidiosum	Amphipoda	4	1666.67
Reference High	2004	2004-07-05	7	Ampithoe spp.	Amphipoda	3	1250
Reference High	2004	2004-07-05	7	Sinelobus stanfordi	Tanaidacea	2	833.333
Reference High	2004	2004-07-05	7	Americorophium spinicorne	Amphipoda	28	11666.7
Reference High	2004	2004-07-05	7	Corophiidae	Amphipoda	12	5000
Reference High	2004	2004-07-05	7	Chironomidae larva	Insecta larva	4	1666.67
Reference High	2004	2004-07-05	7	Manayunkia aestuarina	Polychaeta	3	1250
Reference High	2004	2004-07-05	7	Spionidae	Polychaeta	11	4583.33
Reference High	2004	2004-07-05	7	Oligochaeta	Oligochaeta	97	40416.7
Reference High	2004	2004-07-05	7	Phyllodocidae	Polychaeta	5	2083.33
Reference Low	2004	2004-07-05	1	Phyllodocidae	Polychaeta	2	833.333
Reference Low	2004	2004-07-05	1	Turbellaria	Turbellaria	1	416.667
Reference Low	2004	2004-07-05	1	Corophiidae	Amphipoda	93	38750
Reference Low	2004	2004-07-05	1	Monocorophium insidiosum	Amphipoda	4	1666.67
Reference Low	2004	2004-07-05	1	Americorophium salmonis	Amphipoda	18	7500
Reference Low	2004	2004-07-05	1	Cumella vulgaris	Cumacea	22	9166.67
Reference Low	2004	2004-07-05	1	Oligochaeta	Oligochaeta	26	10833.3
Reference Low	2004	2004-07-05	1	Nematoda	Nematoda	5	2083.33
Reference Low	2004	2004-07-05	1	Capitellidae	Polychaeta	2	833.333
Reference Low	2004	2004-07-05	2	Turbellaria	Turbellaria	4	1666.67
Reference Low	2004	2004-07-05	2	Nematoda	Nematoda	7	2916.67
Reference Low	2004	2004-07-05	2	Oligochaeta	Oligochaeta	55	22916.7
Reference Low	2004	2004-07-05	2	Phyllodocidae	Polychaeta	1	416.667
Reference Low	2004	2004-07-05	2	Cumella vulgaris	Cumacea	13	5416.67
Reference Low	2004	2004-07-05	2	Americorophium salmonis	Amphipoda	12	5000
Reference Low	2004	2004-07-05	2	Corophiidae	Amphipoda	57	23750
Reference Low	2004	2004-07-05	2	Monocorophium insidiosum	Amphipoda	2	833.333
Reference Low	2004	2004-07-05	3	Oligochaeta	Oligochaeta	55	22916.7
Reference Low	2004	2004-07-05	3	Corophiidae	Amphipoda	40	16666.7
Reference Low	2004	2004-07-05	3	Nematoda	Nematoda	7	2916.67
Reference Low	2004	2004-07-05	3	Phyllodocidae	Polychaeta	4	1666.67
Reference Low	2004	2004-07-05	3	Cumella vulgaris	Cumacea	10	4166.67
Reference Low	2004	2004-07-05	3	Monocorophium insidiosum	Amphipoda	1	416.667
Reference Low	2004	2004-07-05	3	Americorophium salmonis	Amphipoda	9	3750
Reference Low	2004	2004-07-05	4	Corophiidae	Amphipoda	55	22916.7
Reference Low	2004	2004-07-05	4	Monocorophium insidiosum	Amphipoda	3	1250
Reference Low	2004	2004-07-05	4	Americorophium salmonis	Amphipoda	10	4166.67
Reference Low	2004	2004-07-05	4	Cumella vulgaris	Cumacea	32	13333.3
Reference Low	2004	2004-07-05	4	Phyllodocidae	Polychaeta	4	1666.67
Reference Low	2004	2004-07-05	4	Oligochaeta	Oligochaeta	60	25000
Reference Low	2004	2004-07-05	4	Nematoda	Nematoda	3	1250
Reference Low	2004	2004-07-05	5	Phyllodocidae	Polychaeta	3	1250
Reference Low	2004	2004-07-05	5	Cumella vulgaris	Cumacea	22	9166.67
Reference Low	2004	2004-07-05	5	Macoma spp.	Bivalvia	1	416.667
Reference Low	2004	2004-07-05	5	Nematoda	Nematoda	4	1666.67
Reference Low	2004	2004-07-05	5	Americorophium salmonis	Amphipoda	11	4583.33
Reference Low	2004	2004-07-05	5	Eogammarus confervicolus	Amphipoda	1	416.667
Reference Low	2004	2004-07-05	5	Monocorophium insidiosum	Amphipoda	2	833.333
Reference Low	2004	2004-07-05	5	Corophiidae	Amphipoda	51	21250
Reference Low	2004	2004-07-05	5	Polychaeta	Polychaeta	1	416.667
Reference Low	2004	2004-07-05	5	Oligochaeta	Oligochaeta	45	18750
Reference Low	2004	2004-07-05	6	Monocorophium insidiosum	Amphipoda	1	416.667
Reference Low	2004	2004-07-05	6	Nematoda	Nematoda	6	2500
Reference Low	2004	2004-07-05	6	Oligochaeta	Oligochaeta	41	17083.3
Reference Low	2004	2004-07-05	6	Phyllodocidae	Polychaeta	1	416.667
Reference Low	2004	2004-07-05	6	Americorophium salmonis	Amphipoda	11	4583.33
Reference Low	2004	2004-07-05	6	Corophiidae	Amphipoda	41	17083.3
Reference Low	2004	2004-07-05	6	Eogammarus confervicolus	Amphipoda	1	416.667
Reference Low	2004	2004-07-05	6	Capitellidae	Polychaeta	2	833.333
Reference Low	2004	2004-07-05	6	Glyceridae	Polychaeta	1	416.667
Reference Low	2004	2004-07-05	6	Cumella vulgaris	Cumacea	24	10000
Reference Low	2004	2004-07-05	7	Anthozoa	Anthozoa	1	416.667
Reference Low	2004	2004-07-05	7	Nematoda	Nematoda	8	3333.33
Reference Low	2004	2004-07-05	7	Oligochaeta	Oligochaeta	48	20000
Reference Low	2004	2004-07-05	7	Phyllodocidae	Polychaeta	2	833.333
Reference Low	2004	2004-07-05	7	Cumella vulgaris	Cumacea	38	15833.3
Reference Low	2004	2004-07-05	7	Corophiidae	Amphipoda	52	21666.7
Reference Low	2004	2004-07-05	7	Macoma spp.	Bivalvia	1	416.667
Reference Low	2004	2004-07-05	7	Ampithoe spp.	Amphipoda	2	833.333
Reference Low	2004	2004-07-05	7	Chironomidae larva	Insecta larva	2	833.333
Reference Low	2004	2004-07-05	7	Americorophium salmonis	Amphipoda	13	5416.67
Reference Low	2004	2004-07-05	7	Monocorophium insidiosum	Amphipoda	3	1250
Reference High	2010	2010-04-19	1	Americorophium salmonis	Amphipoda	2	833.333
Reference High	2010	2010-04-19	1	Capitellidae	Polychaeta	40	16666.7
Reference High	2010	2010-04-19	1	Ceratopogonidae larva	Insecta larva	1	416.667
Reference High	2010	2010-04-19	1	Ceratopogonidae pupa	Insecta larva	1	416.667
Reference High	2010	2010-04-19	1	Chironomidae larva	Insecta larva	3	1250
Reference High	2010	2010-04-19	1	Huntemannia jadensis	Harpacticoida	1	416.667
Reference High	2010	2010-04-19	1	Manayunkia aestuarina	Polychaeta	7	2916.67
Reference High	2010	2010-04-19	1	Nematoda	Nematoda	460	191667
Reference High	2010	2010-04-19	1	Oligochaeta	Oligochaeta	420	175000
Reference High	2010	2010-04-19	1	Spionidae	Polychaeta	13	5416.67
Reference High	2010	2010-04-19	1	Monocorophium insidiosum	Amphipoda	2	833.333
Reference High	2010	2010-04-19	1	Harpacticus spp. A	Harpacticoida	6	2500
Reference High	2010	2010-04-19	2	Americorophium spinicorne	Amphipoda	2	833.333
Reference High	2010	2010-04-19	2	Capitellidae	Polychaeta	21	8750
Reference High	2010	2010-04-19	2	Ceratopogonidae larva	Insecta larva	4	1666.67
Reference High	2010	2010-04-19	2	Chironomidae larva	Insecta larva	26	10833.3
Reference High	2010	2010-04-19	2	Chironomidae pupa	Insecta larva	1	416.667
Reference High	2010	2010-04-19	2	Corophiidae	Amphipoda	2	833.333
Reference High	2010	2010-04-19	2	Eogammarus confervicolus	Amphipoda	2	833.333
Reference High	2010	2010-04-19	2	Amphipoda	Amphipoda	1	416.667
Reference High	2010	2010-04-19	2	Huntemannia jadensis	Harpacticoida	1	416.667
Reference High	2010	2010-04-19	2	Manayunkia aestuarina	Polychaeta	4	1666.67
Reference High	2010	2010-04-19	2	Nematoda	Nematoda	364	151667
Reference High	2010	2010-04-19	2	Oligochaeta	Oligochaeta	500	208333
Reference High	2010	2010-04-19	2	Spionidae	Polychaeta	13	5416.67
Reference High	2010	2010-04-19	2	Harpacticus spp. A	Harpacticoida	1	416.667
Reference High	2010	2010-04-19	3	Americorophium spinicorne	Amphipoda	1	416.667
Reference High	2010	2010-04-19	3	Capitellidae	Polychaeta	72	30000
Reference High	2010	2010-04-19	3	Ceratopogonidae larva	Insecta larva	47	19583.3
Reference High	2010	2010-04-19	3	Ceratopogonidae pupa	Insecta larva	2	833.333
Reference High	2010	2010-04-19	3	Chironomidae larva	Insecta larva	1	416.667
Reference High	2010	2010-04-19	3	Corophiidae	Amphipoda	4	1666.67
Reference High	2010	2010-04-19	3	Huntemannia jadensis	Harpacticoida	6	2500
Reference High	2010	2010-04-19	3	Manayunkia aestuarina	Polychaeta	18	7500
Reference High	2010	2010-04-19	3	Nematoda	Nematoda	1636	681667
Reference High	2010	2010-04-19	3	Oligochaeta	Oligochaeta	628	261667
Reference High	2010	2010-04-19	3	Spionidae	Polychaeta	10	4166.67
Reference High	2010	2010-04-19	3	Sinelobus stanfordi	Tanaidacea	1	416.667
Reference High	2010	2010-04-19	4	Americorophium spinicorne	Amphipoda	15	6250
Reference High	2010	2010-04-19	4	Capitellidae	Polychaeta	45	18750
Reference High	2010	2010-04-19	4	Ceratopogonidae larva	Insecta larva	3	1250
Reference High	2010	2010-04-19	4	Chironomidae larva	Insecta larva	3	1250
Reference High	2010	2010-04-19	4	Corophiidae	Amphipoda	14	5833.33
Reference High	2010	2010-04-19	4	Eogammarus confervicolus	Amphipoda	5	2083.33
Reference High	2010	2010-04-19	4	Manayunkia aestuarina	Polychaeta	67	27916.7
Reference High	2010	2010-04-19	4	Nematoda	Nematoda	96	40000
Reference High	2010	2010-04-19	4	Oligochaeta	Oligochaeta	340	141667
Reference High	2010	2010-04-19	4	Spionidae	Polychaeta	8	3333.33
Reference High	2010	2010-04-19	4	Sinelobus stanfordi	Tanaidacea	4	1666.67
Reference High	2010	2010-04-19	4	Monocorophium insidiosum	Amphipoda	2	833.333
Reference High	2010	2010-04-19	5	Americorophium spinicorne	Amphipoda	2	833.333
Reference High	2010	2010-04-19	5	Capitellidae	Polychaeta	76	31666.7
Reference High	2010	2010-04-19	5	Ceratopogonidae pupa	Insecta larva	2	833.333
Reference High	2010	2010-04-19	5	Ceratopogonidae larva	Insecta larva	4	1666.67
Reference High	2010	2010-04-19	5	Chironomidae larva	Insecta larva	15	6250
Reference High	2010	2010-04-19	5	Corophiidae	Amphipoda	4	1666.67
Reference High	2010	2010-04-19	5	Manayunkia aestuarina	Polychaeta	38	15833.3
Reference High	2010	2010-04-19	5	Nematoda	Nematoda	504	210000
Reference High	2010	2010-04-19	5	Oligochaeta	Oligochaeta	484	201667
Reference High	2010	2010-04-19	5	Polychaeta	Polychaeta	1	416.667
Reference High	2010	2010-04-19	5	Spionidae	Polychaeta	18	7500
Reference High	2010	2010-04-19	5	Sinelobus stanfordi	Tanaidacea	1	416.667
Reference High	2010	2010-04-19	5	Monocorophium insidiosum	Amphipoda	2	833.333
Reference High	2010	2010-04-19	6	Americorophium brevis	Amphipoda	4	1666.67
Reference High	2010	2010-04-19	6	Ampithoe spp.	Amphipoda	1	416.667
Reference High	2010	2010-04-19	6	Capitellidae	Polychaeta	49	20416.7
Reference High	2010	2010-04-19	6	Ceratopogonidae larva	Insecta larva	3	1250
Reference High	2010	2010-04-19	6	Ceratopogonidae pupa	Insecta larva	6	2500
Reference High	2010	2010-04-19	6	Chironomidae larva	Insecta larva	6	2500
Reference High	2010	2010-04-19	6	Corophiidae	Amphipoda	2	833.333
Reference High	2010	2010-04-19	6	Eogammarus confervicolus	Amphipoda	1	416.667
Reference High	2010	2010-04-19	6	Huntemannia jadensis	Harpacticoida	2	833.333
Reference High	2010	2010-04-19	6	Manayunkia aestuarina	Polychaeta	19	7916.67
Reference High	2010	2010-04-19	6	Mytilidae	Bivalvia	1	416.667
Reference High	2010	2010-04-19	6	Nematoda	Nematoda	1068	445000
Reference High	2010	2010-04-19	6	Oligochaeta	Oligochaeta	448	186667
Reference High	2010	2010-04-19	6	Spionidae	Polychaeta	51	21250
Reference High	2010	2010-04-19	6	Sinelobus stanfordi	Tanaidacea	2	833.333
Reference High	2010	2010-04-19	6	Monocorophium insidiosum	Amphipoda	2	833.333
Reference High	2010	2010-04-19	6	Harpacticus spp. A	Harpacticoida	6	2500
Reference High	2010	2010-04-19	7	Capitellidae	Polychaeta	45	18750
Reference High	2010	2010-04-19	7	Ceratopogonidae larva	Insecta larva	6	2500
Reference High	2010	2010-04-19	7	Ceratopogonidae pupa	Insecta larva	5	2083.33
Reference High	2010	2010-04-19	7	Chironomidae larva	Insecta larva	1	416.667
Reference High	2010	2010-04-19	7	Corophiidae	Amphipoda	1	416.667
Reference High	2010	2010-04-19	7	Manayunkia aestuarina	Polychaeta	2	833.333
Reference High	2010	2010-04-19	7	Nematoda	Nematoda	1176	490000
Reference High	2010	2010-04-19	7	Oligochaeta	Oligochaeta	596	248333
Reference High	2010	2010-04-19	7	Spionidae	Polychaeta	21	8750
Reference High	2010	2010-04-19	7	Harpacticus spp. A	Harpacticoida	1	416.667
Reference Low	2010	2010-04-19	1	Spionidae	Polychaeta	1	416.667
Reference Low	2010	2010-04-19	1	Spionidae	Polychaeta	5	2083.33
Reference Low	2010	2010-04-19	1	Phyllodocidae	Polychaeta	1	416.667
Reference Low	2010	2010-04-19	1	Cumella vulgaris	Cumacea	15	6250
Reference Low	2010	2010-04-19	1	Goniadidae	Polychaeta	2	833.333
Reference Low	2010	2010-04-19	1	Chironomidae larva	Insecta larva	1	416.667
Reference Low	2010	2010-04-19	1	Corophiidae	Amphipoda	21	8750
Reference Low	2010	2010-04-19	1	Nematoda	Nematoda	50	20833.3
Reference Low	2010	2010-04-19	1	Capitellidae	Polychaeta	1	416.667
Reference Low	2010	2010-04-19	1	Oligochaeta	Oligochaeta	55	22916.7
Reference Low	2010	2010-04-19	1	Americorophium salmonis	Amphipoda	14	5833.33
Reference Low	2010	2010-04-19	2	Oligochaeta	Oligochaeta	89	37083.3
Reference Low	2010	2010-04-19	2	Cumella vulgaris	Cumacea	22	9166.67
Reference Low	2010	2010-04-19	2	Nematoda	Nematoda	99	41250
Reference Low	2010	2010-04-19	2	Bivalvia	Bivalvia	1	416.667
Reference Low	2010	2010-04-19	2	Goniadidae	Polychaeta	3	1250
Reference Low	2010	2010-04-19	2	Phyllodocidae	Polychaeta	2	833.333
Reference Low	2010	2010-04-19	2	Sinelobus stanfordi	Tanaidacea	1	416.667
Reference Low	2010	2010-04-19	2	Cumella vulgaris	Cumacea	12	5000
Reference Low	2010	2010-04-19	2	Capitellidae	Polychaeta	1	416.667
Reference Low	2010	2010-04-19	2	Turbellaria	Turbellaria	8	3333.33
Reference Low	2010	2010-04-19	2	Americorophium salmonis	Amphipoda	20	8333.33
Reference Low	2010	2010-04-19	2	Polychaeta	Polychaeta	2	833.333
Reference Low	2010	2010-04-19	2	Corophiidae	Amphipoda	27	11250
Reference Low	2010	2010-04-19	3	Ostracoda	Ostracoda	11	4583.33
Reference Low	2010	2010-04-19	3	Cumella vulgaris	Cumacea	44	18333.3
Reference Low	2010	2010-04-19	3	Americorophium salmonis	Amphipoda	28	11666.7
Reference Low	2010	2010-04-19	3	Corophiidae	Amphipoda	24	10000
Reference Low	2010	2010-04-19	3	Oligochaeta	Oligochaeta	74	30833.3
Reference Low	2010	2010-04-19	3	Capitellidae	Polychaeta	15	6250
Reference Low	2010	2010-04-19	3	Chironomidae larva	Insecta larva	1	416.667
Reference Low	2010	2010-04-19	3	Turbellaria	Turbellaria	4	1666.67
Reference Low	2010	2010-04-19	3	Sinelobus stanfordi	Tanaidacea	1	416.667
Reference Low	2010	2010-04-19	4	Hemipodia simplex	Polychaeta	1	416.667
Reference Low	2010	2010-04-19	4	Capitellidae	Polychaeta	1	416.667
Reference Low	2010	2010-04-19	4	Monocorophium insidiosum	Amphipoda	2	833.333
Reference Low	2010	2010-04-19	4	Chironomidae larva	Insecta larva	7	2916.67
Reference Low	2010	2010-04-19	4	Harpacticus spp.	Harpacticoida	2	833.333
Reference Low	2010	2010-04-19	4	Laophontidae	Harpacticoida	2	833.333
Reference Low	2010	2010-04-19	4	Turbellaria	Turbellaria	1	416.667
Reference Low	2010	2010-04-19	4	Cumella vulgaris	Cumacea	16	6666.67
Reference Low	2010	2010-04-19	4	Oligochaeta	Oligochaeta	45	18750
Reference Low	2010	2010-04-19	4	Nematoda	Nematoda	101	42083.3
Reference Low	2010	2010-04-19	4	Corophiidae	Amphipoda	17	7083.33
Reference Low	2010	2010-04-19	4	Polychaeta	Polychaeta	1	416.667
Reference Low	2010	2010-04-19	4	Huntemannia jadensis	Harpacticoida	3	1250
Reference Low	2010	2010-04-19	5	Capitellidae	Polychaeta	2	833.333
Reference Low	2010	2010-04-19	5	Nematoda	Nematoda	140	58333.3
Reference Low	2010	2010-04-19	5	Corophiidae	Amphipoda	28	11666.7
Reference Low	2010	2010-04-19	5	Turbellaria	Turbellaria	2	833.333
Reference Low	2010	2010-04-19	5	Cumella vulgaris	Cumacea	30	12500
Reference Low	2010	2010-04-19	5	Oligochaeta	Oligochaeta	59	24583.3
Reference Low	2010	2010-04-19	5	Monocorophium insidiosum	Amphipoda	3	1250
Reference Low	2010	2010-04-19	5	Phyllodocidae	Polychaeta	1	416.667
Reference Low	2010	2010-04-19	5	Hemipodia simplex	Polychaeta	4	1666.67
Reference Low	2010	2010-04-19	5	Bivalvia	Bivalvia	2	833.333
Reference Low	2010	2010-04-19	5	Harpacticus spp.	Harpacticoida	2	833.333
Reference Low	2010	2010-04-19	5	Spionidae	Polychaeta	1	416.667
Reference Low	2010	2010-04-19	5	Huntemannia jadensis	Harpacticoida	16	6666.67
Reference Low	2010	2010-04-19	5	Sinelobus stanfordi	Tanaidacea	1	416.667
Reference Low	2010	2010-04-19	5	Spionidae	Polychaeta	2	833.333
Reference Low	2010	2010-04-19	6	Cumella vulgaris	Cumacea	48	20000
Reference Low	2010	2010-04-19	6	Phyllodocidae	Polychaeta	12	5000
Reference Low	2010	2010-04-19	6	Bivalvia	Bivalvia	4	1666.67
Reference Low	2010	2010-04-19	6	Huntemannia jadensis	Harpacticoida	4	1666.67
Reference Low	2010	2010-04-19	6	Oligochaeta	Oligochaeta	224	93333.3
Reference Low	2010	2010-04-19	6	Chironomidae larva	Insecta larva	4	1666.67
Reference Low	2010	2010-04-19	6	Turbellaria	Turbellaria	28	11666.7
Reference Low	2010	2010-04-19	6	Corophiidae	Amphipoda	120	50000
Reference Low	2010	2010-04-19	6	Americorophium salmonis	Amphipoda	4	1666.67
Reference Low	2010	2010-04-19	6	Monocorophium insidiosum	Amphipoda	4	1666.67
Reference Low	2010	2010-04-19	6	Eogammarus confervicolus	Amphipoda	4	1666.67
Reference Low	2010	2010-04-19	6	Nematoda	Nematoda	576	240000
Reference Low	2010	2010-04-19	7	Spionidae	Polychaeta	3	1250
Reference Low	2010	2010-04-19	7	Capitellidae	Polychaeta	1	416.667
Reference Low	2010	2010-04-19	7	Spionidae	Polychaeta	1	416.667
Reference Low	2010	2010-04-19	7	Corophiidae	Amphipoda	5	2083.33
Reference Low	2010	2010-04-19	7	Cumella vulgaris	Cumacea	19	7916.67
Reference Low	2010	2010-04-19	7	Oligochaeta	Oligochaeta	34	14166.7
Reference Low	2010	2010-04-19	7	Nematoda	Nematoda	111	46250
Reference Low	2010	2010-04-19	7	Macoma spp.	Bivalvia	1	416.667
Reference Low	2010	2010-04-19	7	Eogammarus confervicolus	Amphipoda	1	416.667
Reference Low	2010	2010-04-19	7	Monocorophium insidiosum	Amphipoda	4	1666.67
Restored High	2010	2010-04-19	1	Oligochaeta	Oligochaeta	103	42916.7
Restored High	2010	2010-04-19	1	Empididae larva	Insecta larva	1	416.667
Restored High	2010	2010-04-19	1	Manayunkia aestuarina	Polychaeta	4	1666.67
Restored High	2010	2010-04-19	1	Ceratopogonidae larva	Insecta larva	1	416.667
Restored High	2010	2010-04-19	1	Chironomidae larva	Insecta larva	10	4166.67
Restored High	2010	2010-04-19	1	Dolichopodidae larva	Insecta larva	1	416.667
Restored High	2010	2010-04-19	1	Turbellaria	Turbellaria	2	833.333
Restored High	2010	2010-04-19	1	Nematoda	Nematoda	31	12916.7
Restored High	2010	2010-04-19	2	Polychaeta	Polychaeta	1	416.667
Restored High	2010	2010-04-19	2	Manayunkia aestuarina	Polychaeta	1	416.667
Restored High	2010	2010-04-19	2	Spionidae	Polychaeta	1	416.667
Restored High	2010	2010-04-19	2	Spionidae	Polychaeta	1	416.667
Restored High	2010	2010-04-19	2	Littorina scutulata egg case	Gastropoda	7	2916.67
Restored High	2010	2010-04-19	2	Dolichopodidae larva	Insecta larva	23	9583.33
Restored High	2010	2010-04-19	2	Chironomidae larva	Insecta larva	22	9166.67
Restored High	2010	2010-04-19	2	Ceratopogonidae larva	Insecta larva	82	34166.7
Restored High	2010	2010-04-19	2	Oligochaeta	Oligochaeta	275	114583
Restored High	2010	2010-04-19	3	Capitellidae	Polychaeta	16	6666.67
Restored High	2010	2010-04-19	3	Ceratopogonidae larva	Insecta larva	4	1666.67
Restored High	2010	2010-04-19	3	Manayunkia aestuarina	Polychaeta	37	15416.7
Restored High	2010	2010-04-19	3	Spionidae	Polychaeta	7	2916.67
Restored High	2010	2010-04-19	3	Oligochaeta	Oligochaeta	123	51250
Restored High	2010	2010-04-19	3	Nematoda	Nematoda	140	58333.3
Restored High	2010	2010-04-19	4	Spionidae	Polychaeta	4	1666.67
Restored High	2010	2010-04-19	4	Eogammarus confervicolus	Amphipoda	2	833.333
Restored High	2010	2010-04-19	4	Oligochaeta	Oligochaeta	478	199167
Restored High	2010	2010-04-19	4	Nematoda	Nematoda	132	55000
Restored High	2010	2010-04-19	4	Manayunkia aestuarina	Polychaeta	78	32500
Restored High	2010	2010-04-19	4	Capitellidae	Polychaeta	24	10000
Restored High	2010	2010-04-19	5	Chironomidae larva	Insecta larva	3	1250
Restored High	2010	2010-04-19	5	Sinelobus stanfordi	Tanaidacea	1	416.667
Restored High	2010	2010-04-19	5	Oligochaeta	Oligochaeta	78	32500
Restored High	2010	2010-04-19	5	Nematoda	Nematoda	41	17083.3
Restored High	2010	2010-04-19	5	Manayunkia aestuarina	Polychaeta	2	833.333
Restored High	2010	2010-04-19	5	Ceratopogonidae larva	Insecta larva	4	1666.67
Restored High	2010	2010-04-19	5	Capitellidae	Polychaeta	2	833.333
Restored High	2010	2010-04-19	5	Cumella vulgaris	Cumacea	1	416.667
Restored High	2010	2010-04-19	5	Dolichopodidae larva	Insecta larva	1	416.667
Restored High	2010	2010-04-19	5	Spionidae	Polychaeta	3	1250
Restored High	2010	2010-04-19	6	Diptera larva	Insecta larva	1	416.667
Restored High	2010	2010-04-19	6	Corophiidae	Amphipoda	1	416.667
Restored High	2010	2010-04-19	6	Oligochaeta	Oligochaeta	103	42916.7
Restored High	2010	2010-04-19	6	Nematoda	Nematoda	34	14166.7
Restored High	2010	2010-04-19	6	Manayunkia aestuarina	Polychaeta	2	833.333
Restored High	2010	2010-04-19	6	Diptera larva	Insecta larva	2	833.333
Restored High	2010	2010-04-19	6	Ceratopogonidae larva	Insecta larva	2	833.333
Restored High	2010	2010-04-19	6	Diptera larva	Insecta larva	3	1250
Restored High	2010	2010-04-19	6	Capitellidae	Polychaeta	1	416.667
Restored High	2010	2010-04-19	7	Ceratopogonidae larva	Insecta larva	8	3333.33
Restored High	2010	2010-04-19	7	Manayunkia aestuarina	Polychaeta	18	7500
Restored High	2010	2010-04-19	7	Nematoda	Nematoda	23	9583.33
Restored High	2010	2010-04-19	7	Oligochaeta	Oligochaeta	309	128750
Restored High	2010	2010-04-19	7	Spionidae	Polychaeta	2	833.333
Restored High	2010	2010-04-19	7	Capitellidae	Polychaeta	2	833.333
Restored Low	2010	2010-04-19	1	Spionidae	Polychaeta	1	416.667
Restored Low	2010	2010-04-19	1	Cumella vulgaris	Cumacea	51	21250
Restored Low	2010	2010-04-19	1	Insecta larva	Insecta larva	1	416.667
Restored Low	2010	2010-04-19	1	Capitellidae	Polychaeta	2	833.333
Restored Low	2010	2010-04-19	1	Manayunkia aestuarina	Polychaeta	2	833.333
Restored Low	2010	2010-04-19	1	Nematoda	Nematoda	78	32500
Restored Low	2010	2010-04-19	1	Turbellaria	Turbellaria	19	7916.67
Restored Low	2010	2010-04-19	1	Bivalvia	Bivalvia	2	833.333
Restored Low	2010	2010-04-19	1	Corophiidae	Amphipoda	19	7916.67
Restored Low	2010	2010-04-19	1	Mytilidae	Bivalvia	3	1250
Restored Low	2010	2010-04-19	1	Sinelobus stanfordi	Tanaidacea	2	833.333
Restored Low	2010	2010-04-19	1	Oligochaeta	Oligochaeta	57	23750
Restored Low	2010	2010-04-19	1	Chironomidae pupa	Insecta larva	1	416.667
Restored Low	2010	2010-04-19	1	Ampithoe spp.	Amphipoda	1	416.667
Restored Low	2010	2010-04-19	1	Gnorimosphaeroma insulare	Isopoda	1	416.667
Restored Low	2010	2010-04-19	1	Bivalvia	Bivalvia	1	416.667
Restored Low	2010	2010-04-19	1	Syllidae	Polychaeta	7	2916.67
Restored Low	2010	2010-04-19	1	Polychaeta	Polychaeta	2	833.333
Restored Low	2010	2010-04-19	2	Oligochaeta	Oligochaeta	33	13750
Restored Low	2010	2010-04-19	2	Monocorophium acherusicum	Amphipoda	6	2500
Restored Low	2010	2010-04-19	2	Nematoda	Nematoda	290	120833
Restored Low	2010	2010-04-19	2	Capitellidae	Polychaeta	7	2916.67
Restored Low	2010	2010-04-19	2	Polychaeta	Polychaeta	1	416.667
Restored Low	2010	2010-04-19	2	Capitellidae	Polychaeta	3	1250
Restored Low	2010	2010-04-19	2	Manayunkia aestuarina	Polychaeta	2	833.333
Restored Low	2010	2010-04-19	2	Corophiidae	Amphipoda	23	9583.33
Restored Low	2010	2010-04-19	2	Turbellaria	Turbellaria	6	2500
Restored Low	2010	2010-04-19	2	Cumella vulgaris	Cumacea	44	18333.3
Restored Low	2010	2010-04-19	2	Monocorophium insidiosum	Amphipoda	4	1666.67
Restored Low	2010	2010-04-19	2	Bivalvia	Bivalvia	1	416.667
Restored Low	2010	2010-04-19	2	Sinelobus stanfordi	Tanaidacea	8	3333.33
Restored Low	2010	2010-04-19	2	Chironomidae larva	Insecta larva	1	416.667
Restored Low	2010	2010-04-19	2	Syllidae	Polychaeta	2	833.333
Restored Low	2010	2010-04-19	3	Syllidae	Polychaeta	15	6250
Restored Low	2010	2010-04-19	3	Polychaeta	Polychaeta	1	416.667
Restored Low	2010	2010-04-19	3	Spionidae	Polychaeta	1	416.667
Restored Low	2010	2010-04-19	3	Goniadidae	Polychaeta	3	1250
Restored Low	2010	2010-04-19	3	Turbellaria	Turbellaria	13	5416.67
Restored Low	2010	2010-04-19	3	Manayunkia aestuarina	Polychaeta	1	416.667
Restored Low	2010	2010-04-19	3	Nematoda	Nematoda	145	60416.7
Restored Low	2010	2010-04-19	3	Capitellidae	Polychaeta	6	2500
Restored Low	2010	2010-04-19	3	Oligochaeta	Oligochaeta	63	26250
Restored Low	2010	2010-04-19	4	Monocorophium spp.	Amphipoda	6	2500
Restored Low	2010	2010-04-19	4	Chironomidae pupa	Insecta larva	1	416.667
Restored Low	2010	2010-04-19	4	Capitellidae	Polychaeta	8	3333.33
Restored Low	2010	2010-04-19	4	Syllidae	Polychaeta	3	1250
Restored Low	2010	2010-04-19	4	Goniadidae	Polychaeta	1	416.667
Restored Low	2010	2010-04-19	4	Oligochaeta	Oligochaeta	17	7083.33
Restored Low	2010	2010-04-19	4	Nematoda	Nematoda	146	60833.3
Restored Low	2010	2010-04-19	4	Cumella vulgaris	Cumacea	14	5833.33
Restored Low	2010	2010-04-19	4	Turbellaria	Turbellaria	3	1250
Restored Low	2010	2010-04-19	5	Nereididae	Polychaeta	1	416.667
Restored Low	2010	2010-04-19	5	Monocorophium insidiosum	Amphipoda	1	416.667
Restored Low	2010	2010-04-19	5	Monocorophium spp.	Amphipoda	10	4166.67
Restored Low	2010	2010-04-19	5	Turbellaria	Turbellaria	2	833.333
Restored Low	2010	2010-04-19	5	Cumella vulgaris	Cumacea	24	10000
Restored Low	2010	2010-04-19	5	Capitellidae	Polychaeta	3	1250
Restored Low	2010	2010-04-19	5	Oligochaeta	Oligochaeta	94	39166.7
Restored Low	2010	2010-04-19	5	Goniadidae	Polychaeta	3	1250
Restored Low	2010	2010-04-19	5	Nematoda	Nematoda	48	20000
Restored Low	2010	2010-04-19	6	Monocorophium insidiosum	Amphipoda	4	1666.67
Restored Low	2010	2010-04-19	6	Americorophium salmonis	Amphipoda	3	1250
Restored Low	2010	2010-04-19	6	Goniadidae	Polychaeta	1	416.667
Restored Low	2010	2010-04-19	6	Bivalvia	Bivalvia	1	416.667
Restored Low	2010	2010-04-19	6	Nematoda	Nematoda	47	19583.3
Restored Low	2010	2010-04-19	6	Eogammarus confervicolus	Amphipoda	3	1250
Restored Low	2010	2010-04-19	6	Monocorophium spp.	Amphipoda	2	833.333
Restored Low	2010	2010-04-19	6	Turbellaria	Turbellaria	1	416.667
Restored Low	2010	2010-04-19	6	Capitellidae	Polychaeta	5	2083.33
Restored Low	2010	2010-04-19	6	Oligochaeta	Oligochaeta	24	10000
Restored Low	2010	2010-04-19	6	Chironomidae larva	Insecta larva	1	416.667
Restored Low	2010	2010-04-19	6	Hyalidae	Amphipoda	1	416.667
Restored Low	2010	2010-04-19	6	Monocorophium acherusicum	Amphipoda	1	416.667
Restored Low	2010	2010-04-19	6	Cumella vulgaris	Cumacea	24	10000
Restored Low	2010	2010-04-19	7	Syllidae	Polychaeta	3	1250
Restored Low	2010	2010-04-19	7	Cumella vulgaris	Cumacea	46	19166.7
Restored Low	2010	2010-04-19	7	Monocorophium acherusicum	Amphipoda	3	1250
Restored Low	2010	2010-04-19	7	Monocorophium insidiosum	Amphipoda	7	2916.67
Restored Low	2010	2010-04-19	7	Turbellaria	Turbellaria	5	2083.33
Restored Low	2010	2010-04-19	7	Monocorophium spp.	Amphipoda	13	5416.67
Restored Low	2010	2010-04-19	7	Bivalvia	Bivalvia	1	416.667
Restored Low	2010	2010-04-19	7	Capitellidae	Polychaeta	1	416.667
Restored Low	2010	2010-04-19	7	Nematoda	Nematoda	128	53333.3
Restored Low	2010	2010-04-19	7	Oligochaeta	Oligochaeta	82	34166.7
Restored Low	2010	2010-04-19	7	Spionidae	Polychaeta	1	416.667
Restored Low	2010	2010-04-19	7	Goniadidae	Polychaeta	1	416.667
Restored Low	2010	2010-04-19	7	Spionidae	Polychaeta	1	416.667
Reference High	2010	2010-05-18	1	Corophiidae	Amphipoda	15	6250
Reference High	2010	2010-05-18	1	Nematoda	Nematoda	352	146667
Reference High	2010	2010-05-18	1	Sinelobus stanfordi	Tanaidacea	20	8333.33
Reference High	2010	2010-05-18	1	Huntemannia jadensis	Harpacticoida	7	2916.67
Reference High	2010	2010-05-18	1	Harpacticus spp. A	Harpacticoida	1	416.667
Reference High	2010	2010-05-18	1	Bivalvia	Bivalvia	1	416.667
Reference High	2010	2010-05-18	1	Chironomidae larva	Insecta larva	8	3333.33
Reference High	2010	2010-05-18	1	Americorophium spinicorne	Amphipoda	18	7500
Reference High	2010	2010-05-18	1	Capitellidae	Polychaeta	142	59166.7
Reference High	2010	2010-05-18	1	Ceratopogonidae pupa	Insecta larva	1	416.667
Reference High	2010	2010-05-18	1	Oligochaeta	Oligochaeta	649	270417
Reference High	2010	2010-05-18	1	Spionidae	Polychaeta	181	75416.7
Reference High	2010	2010-05-18	1	Monocorophium insidiosum	Amphipoda	14	5833.33
Reference High	2010	2010-05-18	1	Manayunkia aestuarina	Polychaeta	54	22500
Reference High	2010	2010-05-18	2	Huntemannia jadensis	Harpacticoida	12	5000
Reference High	2010	2010-05-18	2	Americorophium spinicorne	Amphipoda	28	11666.7
Reference High	2010	2010-05-18	2	Spionidae	Polychaeta	22	9166.67
Reference High	2010	2010-05-18	2	Eogammarus confervicolus	Amphipoda	44	18333.3
Reference High	2010	2010-05-18	2	Corophiidae	Amphipoda	20	8333.33
Reference High	2010	2010-05-18	2	Capitellidae	Polychaeta	66	27500
Reference High	2010	2010-05-18	2	Chironomidae larva	Insecta larva	18	7500
Reference High	2010	2010-05-18	2	Americorophium salmonis	Amphipoda	4	1666.67
Reference High	2010	2010-05-18	2	Oligochaeta	Oligochaeta	936	390000
Reference High	2010	2010-05-18	2	Nematoda	Nematoda	681	283750
Reference High	2010	2010-05-18	2	Manayunkia aestuarina	Polychaeta	18	7500
Reference High	2010	2010-05-18	2	Chironomidae pupa	Insecta larva	1	416.667
Reference High	2010	2010-05-18	2	Ceratopogonidae larva	Insecta larva	1	416.667
Reference High	2010	2010-05-18	2	Monocorophium insidiosum	Amphipoda	2	833.333
Reference High	2010	2010-05-18	2	Sinelobus stanfordi	Tanaidacea	11	4583.33
Reference High	2010	2010-05-18	3	Eogammarus confervicolus	Amphipoda	1	416.667
Reference High	2010	2010-05-18	3	Amphipoda	Amphipoda	2	833.333
Reference High	2010	2010-05-18	3	Nereididae	Polychaeta	1	416.667
Reference High	2010	2010-05-18	3	Capitellidae	Polychaeta	109	45416.7
Reference High	2010	2010-05-18	3	Nematoda	Nematoda	1850	770833
Reference High	2010	2010-05-18	3	Ceratopogonidae larva	Insecta larva	2	833.333
Reference High	2010	2010-05-18	3	Oligochaeta	Oligochaeta	502	209167
Reference High	2010	2010-05-18	3	Ceratopogonidae pupa	Insecta larva	6	2500
Reference High	2010	2010-05-18	3	Huntemannia jadensis	Harpacticoida	24	10000
Reference High	2010	2010-05-18	3	Sinelobus stanfordi	Tanaidacea	31	12916.7
Reference High	2010	2010-05-18	3	Harpacticoida	Harpacticoida	1	416.667
Reference High	2010	2010-05-18	3	Manayunkia aestuarina	Polychaeta	14	5833.33
Reference High	2010	2010-05-18	3	Spionidae	Polychaeta	143	59583.3
Reference High	2010	2010-05-18	3	Corophiidae	Amphipoda	17	7083.33
Reference High	2010	2010-05-18	3	Americorophium spinicorne	Amphipoda	7	2916.67
Reference High	2010	2010-05-18	3	Americorophium salmonis	Amphipoda	2	833.333
Reference High	2010	2010-05-18	3	Harpacticoida	Harpacticoida	1	416.667
Reference High	2010	2010-05-18	3	Chironomidae larva	Insecta larva	23	9583.33
Reference High	2010	2010-05-18	4	Polychaeta	Polychaeta	1	416.667
Reference High	2010	2010-05-18	4	Chironomidae larva	Insecta larva	17	7083.33
Reference High	2010	2010-05-18	4	Americorophium spinicorne	Amphipoda	4	1666.67
Reference High	2010	2010-05-18	4	Americorophium salmonis	Amphipoda	3	1250
Reference High	2010	2010-05-18	4	Corophiidae	Amphipoda	17	7083.33
Reference High	2010	2010-05-18	4	Spionidae	Polychaeta	182	75833.3
Reference High	2010	2010-05-18	4	Nereididae	Polychaeta	1	416.667
Reference High	2010	2010-05-18	4	Manayunkia aestuarina	Polychaeta	17	7083.33
Reference High	2010	2010-05-18	4	Nematoda	Nematoda	585	243750
Reference High	2010	2010-05-18	4	Oligochaeta	Oligochaeta	600	250000
Reference High	2010	2010-05-18	4	Monocorophium insidiosum	Amphipoda	3	1250
Reference High	2010	2010-05-18	4	Ceratopogonidae pupa	Insecta larva	1	416.667
Reference High	2010	2010-05-18	4	Capitellidae	Polychaeta	95	39583.3
Reference High	2010	2010-05-18	4	Sinelobus stanfordi	Tanaidacea	19	7916.67
Reference High	2010	2010-05-18	4	Huntemannia jadensis	Harpacticoida	4	1666.67
Reference High	2010	2010-05-18	5	Americorophium salmonis	Amphipoda	1	416.667
Reference High	2010	2010-05-18	5	Harpacticus spp. A	Harpacticoida	3	1250
Reference High	2010	2010-05-18	5	Nereididae	Polychaeta	1	416.667
Reference High	2010	2010-05-18	5	Spionidae	Polychaeta	52	21666.7
Reference High	2010	2010-05-18	5	Corophiidae	Amphipoda	10	4166.67
Reference High	2010	2010-05-18	5	Americorophium spinicorne	Amphipoda	14	5833.33
Reference High	2010	2010-05-18	5	Oligochaeta	Oligochaeta	336	140000
Reference High	2010	2010-05-18	5	Monocorophium insidiosum	Amphipoda	26	10833.3
Reference High	2010	2010-05-18	5	Capitellidae	Polychaeta	51	21250
Reference High	2010	2010-05-18	5	Nematoda	Nematoda	404	168333
Reference High	2010	2010-05-18	5	Polychaeta	Polychaeta	1	416.667
Reference High	2010	2010-05-18	5	Ceratopogonidae larva	Insecta larva	2	833.333
Reference High	2010	2010-05-18	5	Sinelobus stanfordi	Tanaidacea	21	8750
Reference High	2010	2010-05-18	5	Chironomidae larva	Insecta larva	20	8333.33
[truncated: 3,765 more rows]

## Sheet: 2004, 2010, 2012 insects
Site	Date	year	Rep	Taxa	Count	Density
Restored	2004-04-22	2004	1	Chironomidae	9	43.0622
Restored	2004-04-22	2004	1	Scatopsidae	3	14.3541
Restored	2004-04-22	2004	1	Psocoptera nymph	1	4.78469
Restored	2004-04-22	2004	2	Tachinidae	1	4.78469
Restored	2004-04-22	2004	2	Chironomidae	1	4.78469
Restored	2004-04-22	2004	2	Entomobryomorpha/Poduromorpha	1	4.78469
Restored	2004-04-22	2004	2	Acari	1	4.78469
Restored	2004-04-22	2004	3	Muscomorpha	1	4.78469
Restored	2004-04-22	2004	3	Psychodidae	1	4.78469
Restored	2004-04-22	2004	3	Chironomidae	1	4.78469
Restored	2004-04-22	2004	3	Psocoptera nymph	2	9.56938
Restored	2004-04-22	2004	3	Psyllidae	1	4.78469
Restored	2004-04-22	2004	3	Araneae	1	4.78469
Restored	2004-04-22	2004	3	Thysanoptera	1	4.78469
Restored	2004-04-22	2004	4	Psocoptera nymph	1	4.78469
Restored	2004-04-22	2004	4	Coleoptera	1	4.78469
Restored	2004-04-22	2004	4	Hemiptera nymph	1	4.78469
Restored	2004-04-22	2004	4	Chironomidae	3	14.3541
Restored	2004-04-22	2004	4	Aphidoidea	1	4.78469
Restored	2004-04-22	2004	4	Sminthuridae	1	4.78469
Restored	2004-04-22	2004	5	Chironomidae	2	9.56938
Restored	2004-04-22	2004	5	Coleoptera	1	4.78469
Restored	2004-04-22	2004	5	Psocoptera	1	4.78469
Restored	2004-04-22	2004	5	Thysanoptera larva	1	4.78469
Restored	2004-04-22	2004	5	Psyllidae	1	4.78469
Restored	2004-04-22	2004	6	Chironomidae	3	14.3541
Restored	2004-04-22	2004	6	Aphidoidea	1	4.78469
Restored	2004-04-22	2004	6	Entomobryomorpha/Poduromorpha	1	4.78469
Restored	2004-04-22	2004	6	Thysanoptera larva	1	4.78469
Restored	2004-04-22	2004	6	Acari	1	4.78469
Restored	2004-04-22	2004	6	Tipulidae	1	4.78469
Restored	2004-04-22	2004	6	Psocoptera	1	4.78469
Restored	2004-04-22	2004	7	Chironomidae	11	52.6316
Restored	2004-04-22	2004	7	Acari	1	4.78469
Restored	2004-04-22	2004	7	Formicidae	1	4.78469
Restored	2004-04-22	2004	7	Thysanoptera	1	4.78469
Reference	2004-04-22	2004	1	Chironomidae	9	43.0622
Reference	2004-04-22	2004	1	Phoridae	1	4.78469
Reference	2004-04-22	2004	1	Aphidoidea	6	28.7081
Reference	2004-04-22	2004	1	Sminthuridae	2	9.56938
Reference	2004-04-22	2004	1	Entomobryomorpha/Poduromorpha	26	124.402
Reference	2004-04-22	2004	1	Thysanoptera	4	19.1388
Reference	2004-04-22	2004	1	Thysanoptera larva	12	57.4163
Reference	2004-04-22	2004	1	Sciaridae	3	14.3541
Reference	2004-04-22	2004	1	Tenthredinoidea	8	38.2775
Reference	2004-04-22	2004	1	Psychodidae	1	4.78469
Reference	2004-04-22	2004	1	Acari	88	421.053
Reference	2004-04-22	2004	1	Porcellio scaber	7	33.4928
Reference	2004-04-22	2004	1	Littorophiloscia richardsonae	2	9.56938
Reference	2004-04-22	2004	1	Ichneumonidae	1	4.78469
Reference	2004-04-22	2004	1	Diptera larva	17	81.3397
Reference	2004-04-22	2004	1	Araneae	2	9.56938
Reference	2004-04-22	2004	1	Psocoptera	8	38.2775
Reference	2004-04-22	2004	2	Acari	173	827.751
Reference	2004-04-22	2004	2	Coleoptera	2	9.56938
Reference	2004-04-22	2004	2	Entomobryomorpha/Poduromorpha	34	162.679
Reference	2004-04-22	2004	2	Sminthuridae	5	23.9234
Reference	2004-04-22	2004	2	Ichneumonidae	1	4.78469
Reference	2004-04-22	2004	2	Tenthredinoidea	6	28.7081
Reference	2004-04-22	2004	2	Chironomidae larva	5	23.9234
Reference	2004-04-22	2004	2	Psocoptera	12	57.4163
Reference	2004-04-22	2004	2	Thysanoptera	12	57.4163
Reference	2004-04-22	2004	2	Thysanoptera larva	23	110.048
Reference	2004-04-22	2004	2	Chironomidae	10	47.8469
Reference	2004-04-22	2004	2	Diptera larva	16	76.555
Reference	2004-04-22	2004	2	Coleoptera larva	3	14.3541
Reference	2004-04-22	2004	2	Araneae	7	33.4928
Reference	2004-04-22	2004	2	Porcellio scaber	7	33.4928
Reference	2004-04-22	2004	2	Littorophiloscia richardsonae	1	4.78469
Reference	2004-04-22	2004	3	Acari	192	918.66
Reference	2004-04-22	2004	3	Araneae	2	9.56938
Reference	2004-04-22	2004	3	Entomobryomorpha/Poduromorpha	23	110.048
Reference	2004-04-22	2004	3	Sminthuridae	11	52.6316
Reference	2004-04-22	2004	3	Chironomidae larva	17	81.3397
Reference	2004-04-22	2004	3	Chironomidae	13	62.201
Reference	2004-04-22	2004	3	Diptera larva	12	57.4163
Reference	2004-04-22	2004	3	Thysanoptera larva	22	105.263
Reference	2004-04-22	2004	3	Tenthredinoidea	4	19.1388
Reference	2004-04-22	2004	3	Sciaridae	4	19.1388
Reference	2004-04-22	2004	3	Hymenoptera	3	14.3541
Reference	2004-04-22	2004	3	Hemiptera	3	14.3541
Reference	2004-04-22	2004	3	Hemiptera	7	33.4928
Reference	2004-04-22	2004	4	Acari	87	416.268
Reference	2004-04-22	2004	4	Diptera larva	8	38.2775
Reference	2004-04-22	2004	4	Chironomidae larva	2	9.56938
Reference	2004-04-22	2004	4	Sminthuridae	4	19.1388
Reference	2004-04-22	2004	4	Entomobryomorpha/Poduromorpha	9	43.0622
Reference	2004-04-22	2004	4	Araneae	4	19.1388
Reference	2004-04-22	2004	4	Thysanoptera larva	5	23.9234
Reference	2004-04-22	2004	4	Thysanoptera	1	4.78469
Reference	2004-04-22	2004	4	Anthomyiidae	2	9.56938
Reference	2004-04-22	2004	4	Aphidoidea	4	19.1388
Reference	2004-04-22	2004	4	Chironomidae	8	38.2775
Reference	2004-04-22	2004	4	Sciaridae	2	9.56938
Reference	2004-04-22	2004	4	Hymenoptera	2	9.56938
Reference	2004-04-22	2004	4	Phoridae	1	4.78469
Reference	2004-04-22	2004	4	Porcellio scaber	1	4.78469
Reference	2004-04-22	2004	4	Littorophiloscia richardsonae	1	4.78469
Reference	2004-04-22	2004	5	Porcellio scaber	2	9.56938
Reference	2004-04-22	2004	5	Coleoptera	1	4.78469
Reference	2004-04-22	2004	5	Chironomidae	5	23.9234
Reference	2004-04-22	2004	5	Diptera larva	9	43.0622
Reference	2004-04-22	2004	5	Acari	198	947.368
Reference	2004-04-22	2004	5	Araneae	1	4.78469
Reference	2004-04-22	2004	5	Chironomidae larva	4	19.1388
Reference	2004-04-22	2004	5	Cecidomyiidae	1	4.78469
Reference	2004-04-22	2004	5	Entomobryomorpha/Poduromorpha	22	105.263
Reference	2004-04-22	2004	5	Sminthuridae	15	71.7703
Reference	2004-04-22	2004	5	Muscomorpha	1	4.78469
Reference	2004-04-22	2004	5	Hymenoptera	5	23.9234
Reference	2004-04-22	2004	5	Thysanoptera larva	12	57.4163
Reference	2004-04-22	2004	5	Thysanoptera	3	14.3541
Reference	2004-04-22	2004	5	Sciaridae	1	4.78469
Reference	2004-04-22	2004	5	Aphidoidea	7	33.4928
Reference	2004-04-22	2004	5	Hemiptera nymph	2	9.56938
Reference	2004-04-22	2004	5	Hemiptera	1	4.78469
Reference	2004-04-22	2004	6	Araneae	7	33.4928
Reference	2004-04-22	2004	6	Coleoptera	3	14.3541
Reference	2004-04-22	2004	6	Porcellio scaber	6	28.7081
Reference	2004-04-22	2004	6	Littorophiloscia richardsonae	4	19.1388
Reference	2004-04-22	2004	6	Acari	78	373.206
Reference	2004-04-22	2004	6	Entomobryomorpha/Poduromorpha	24	114.833
Reference	2004-04-22	2004	6	Sminthuridae	2	9.56938
Reference	2004-04-22	2004	6	Aphidoidea	8	38.2775
Reference	2004-04-22	2004	6	Chironomidae larva	4	19.1388
Reference	2004-04-22	2004	6	Diptera larva	15	71.7703
Reference	2004-04-22	2004	6	Sciaridae	8	38.2775
Reference	2004-04-22	2004	6	Mycetophilidae	2	9.56938
Reference	2004-04-22	2004	6	Chironomidae	4	19.1388
Reference	2004-04-22	2004	6	Psychodidae	1	4.78469
Reference	2004-04-22	2004	6	Phoridae	1	4.78469
Reference	2004-04-22	2004	6	Hymenoptera	3	14.3541
Reference	2004-04-22	2004	6	Thysanoptera larva	16	76.555
Reference	2004-04-22	2004	6	Thysanoptera	1	4.78469
Reference	2004-04-22	2004	6	Anthomyiidae	1	4.78469
Reference	2004-04-22	2004	6	Insecta	1	4.78469
Reference	2004-04-22	2004	6	Lepidoptera larva	1	4.78469
Reference	2004-04-22	2004	7	Araneae	5	23.9234
Reference	2004-04-22	2004	7	Porcellio scaber	1	4.78469
Reference	2004-04-22	2004	7	Acari	14	66.9856
Reference	2004-04-22	2004	7	Diptera larva	12	57.4163
Reference	2004-04-22	2004	7	Hymenoptera	4	19.1388
Reference	2004-04-22	2004	7	Anthomyiidae	1	4.78469
Reference	2004-04-22	2004	7	Muscomorpha	1	4.78469
Reference	2004-04-22	2004	7	Sminthuridae	2	9.56938
Reference	2004-04-22	2004	7	Entomobryomorpha/Poduromorpha	9	43.0622
Reference	2004-04-22	2004	7	Chironomidae	4	19.1388
Reference	2004-04-22	2004	7	Sciaridae	3	14.3541
Reference	2004-04-22	2004	7	Phoridae	1	4.78469
Reference	2004-04-22	2004	7	Thysanoptera larva	11	52.6316
Reference	2004-04-22	2004	7	Aphidoidea	12	57.4163
Reference	2004-04-22	2004	7	Hemiptera	1	4.78469
Reference	2004-04-22	2004	7	Formicidae	2	9.56938
Reference	2004-04-22	2004	7	Hemiptera	3	14.3541
Reference	2004-04-22	2004	7	Aphidoidea	1	4.78469
Reference	2004-04-22	2004	7	Neuroptera	1	4.78469
Reference	2004-04-22	2004	7	Coleoptera larva	1	4.78469
Restored	2004-05-24	2004	1	Ephydridae	1	4.78469
Restored	2004-05-24	2004	1	Coleoptera	1	4.78469
Restored	2004-05-24	2004	1	Tachinidae	1	4.78469
Restored	2004-05-24	2004	1	Aphidoidea	2	9.56938
Restored	2004-05-24	2004	1	Thysanoptera	1	4.78469
Restored	2004-05-24	2004	1	Acari	1	4.78469
Restored	2004-05-24	2004	1	Muscomorpha	1	4.78469
Restored	2004-05-24	2004	1	Entomobryomorpha/Poduromorpha	1	4.78469
Restored	2004-05-24	2004	2	Acari	10	47.8469
Restored	2004-05-24	2004	2	Entomobryomorpha/Poduromorpha	1	4.78469
Restored	2004-05-24	2004	2	Aphidoidea	2	9.56938
Restored	2004-05-24	2004	2	Chironomidae	1	4.78469
Restored	2004-05-24	2004	2	Araneae	1	4.78469
Restored	2004-05-24	2004	2	Ceratopogonidae	2	9.56938
Restored	2004-05-24	2004	3	Therevidae	1	4.78469
Restored	2004-05-24	2004	3	Sciaridae	1	4.78469
Restored	2004-05-24	2004	3	Thysanoptera	1	4.78469
Restored	2004-05-24	2004	3	Cecidomyiidae	1	4.78469
Restored	2004-05-24	2004	3	Ceratopogonidae	1	4.78469
Restored	2004-05-24	2004	3	Phoridae	1	4.78469
Restored	2004-05-24	2004	3	Aphidoidea	1	4.78469
Restored	2004-05-24	2004	3	Muscomorpha	1	4.78469
Restored	2004-05-24	2004	4	Acari	12	57.4163
Restored	2004-05-24	2004	4	Coleoptera	1	4.78469
Restored	2004-05-24	2004	4	Thysanoptera	2	9.56938
Restored	2004-05-24	2004	4	Araneae	1	4.78469
Restored	2004-05-24	2004	4	Entomobryomorpha/Poduromorpha	1	4.78469
Restored	2004-05-24	2004	4	Chironomidae	2	9.56938
Restored	2004-05-24	2004	4	Psychodidae	1	4.78469
Restored	2004-05-24	2004	4	Psocoptera	1	4.78469
Restored	2004-05-24	2004	4	Sciaridae	1	4.78469
Restored	2004-05-24	2004	5	Acari	15	71.7703
Restored	2004-05-24	2004	5	Entomobryomorpha/Poduromorpha	2	9.56938
Restored	2004-05-24	2004	5	Sminthuridae	1	4.78469
Restored	2004-05-24	2004	5	Lepidoptera	1	4.78469
Restored	2004-05-24	2004	5	Psychodidae	2	9.56938
Restored	2004-05-24	2004	5	Sciaridae	1	4.78469
Restored	2004-05-24	2004	5	Hymenoptera	1	4.78469
Restored	2004-05-24	2004	5	Hemiptera	2	9.56938
Restored	2004-05-24	2004	5	Hemiptera	3	14.3541
Restored	2004-05-24	2004	5	Thysanoptera	1	4.78469
Restored	2004-05-24	2004	6	Acari	6	28.7081
Restored	2004-05-24	2004	6	Entomobryomorpha/Poduromorpha	1	4.78469
Restored	2004-05-24	2004	6	Chironomidae	2	9.56938
Restored	2004-05-24	2004	6	Hemiptera nymph	1	4.78469
Restored	2004-05-24	2004	6	Aphidoidea	2	9.56938
Restored	2004-05-24	2004	6	Ceratopogonidae	1	4.78469
Restored	2004-05-24	2004	6	Cecidomyiidae	1	4.78469
Restored	2004-05-24	2004	6	Thysanoptera	1	4.78469
Restored	2004-05-24	2004	6	Hemiptera	2	9.56938
Restored	2004-05-24	2004	7	Acari	11	52.6316
Restored	2004-05-24	2004	7	Araneae	1	4.78469
Restored	2004-05-24	2004	7	Entomobryomorpha/Poduromorpha	4	19.1388
Restored	2004-05-24	2004	7	Sminthuridae	1	4.78469
Restored	2004-05-24	2004	7	Cecidomyiidae	2	9.56938
Restored	2004-05-24	2004	7	Aphidoidea	1	4.78469
Restored	2004-05-24	2004	7	Hemiptera	1	4.78469
Restored	2004-05-24	2004	7	Ceratopogonidae	1	4.78469
Restored	2004-05-24	2004	7	Psocoptera nymph	1	4.78469
Restored	2004-05-24	2004	7	Hemiptera	1	4.78469
Reference	2004-05-24	2004	1	Araneae	6	28.7081
Reference	2004-05-24	2004	1	Coleoptera	1	4.78469
Reference	2004-05-24	2004	1	Acari	14	66.9856
Reference	2004-05-24	2004	1	Aphidoidea	122	583.732
Reference	2004-05-24	2004	1	Entomobryomorpha/Poduromorpha	41	196.172
Reference	2004-05-24	2004	1	Sminthuridae	2	9.56938
Reference	2004-05-24	2004	1	Muscomorpha	1	4.78469
Reference	2004-05-24	2004	1	Aphidoidea	9	43.0622
Reference	2004-05-24	2004	1	Hemiptera	4	19.1388
Reference	2004-05-24	2004	1	Psychodidae	3	14.3541
Reference	2004-05-24	2004	1	Chironomidae	5	23.9234
Reference	2004-05-24	2004	1	Hymenoptera	3	14.3541
Reference	2004-05-24	2004	1	Cecidomyiidae	3	14.3541
Reference	2004-05-24	2004	1	Siphonaptera	1	4.78469
Reference	2004-05-24	2004	1	Insecta larva	14	66.9856
Reference	2004-05-24	2004	1	Coleoptera larva	1	4.78469
Reference	2004-05-24	2004	1	Lepidoptera larva	2	9.56938
Reference	2004-05-24	2004	2	Araneae	6	28.7081
Reference	2004-05-24	2004	2	Porcellio scaber	2	9.56938
Reference	2004-05-24	2004	2	Littorophiloscia richardsonae	2	9.56938
Reference	2004-05-24	2004	2	Acari	14	66.9856
Reference	2004-05-24	2004	2	Aphidoidea	146	698.565
Reference	2004-05-24	2004	2	Anisopodidae	1	4.78469
Reference	2004-05-24	2004	2	Hymenoptera	2	9.56938
Reference	2004-05-24	2004	2	Hemiptera	2	9.56938
Reference	2004-05-24	2004	2	Chironomidae	10	47.8469
Reference	2004-05-24	2004	2	Psychodidae	3	14.3541
Reference	2004-05-24	2004	2	Sciaridae	2	9.56938
Reference	2004-05-24	2004	2	Mycetophilidae	1	4.78469
Reference	2004-05-24	2004	2	Aphidoidea	14	66.9856
Reference	2004-05-24	2004	2	Hemiptera nymph	1	4.78469
Reference	2004-05-24	2004	2	Thysanoptera	3	14.3541
Reference	2004-05-24	2004	2	Thysanoptera larva	1	4.78469
Reference	2004-05-24	2004	2	Entomobryomorpha/Poduromorpha	15	71.7703
Reference	2004-05-24	2004	2	Sminthuridae	1	4.78469
Reference	2004-05-24	2004	2	Diptera larva	3	14.3541
Reference	2004-05-24	2004	3	Araneae	10	47.8469
Reference	2004-05-24	2004	3	Coleoptera	1	4.78469
Reference	2004-05-24	2004	3	Porcellio scaber	5	23.9234
Reference	2004-05-24	2004	3	Littorophiloscia richardsonae	2	9.56938
Reference	2004-05-24	2004	3	Microcoryphia	7	33.4928
Reference	2004-05-24	2004	3	Sminthuridae	4	19.1388
Reference	2004-05-24	2004	3	Entomobryomorpha/Poduromorpha	89	425.837
Reference	2004-05-24	2004	3	Aphidoidea	124	593.301
Reference	2004-05-24	2004	3	Acari	19	90.9091
Reference	2004-05-24	2004	3	Aphidoidea	11	52.6316
Reference	2004-05-24	2004	3	Muscomorpha	2	9.56938
Reference	2004-05-24	2004	3	Hemiptera	3	14.3541
Reference	2004-05-24	2004	3	Psocoptera	3	14.3541
Reference	2004-05-24	2004	3	Cecidomyiidae	14	66.9856
Reference	2004-05-24	2004	3	Psychodidae	1	4.78469
Reference	2004-05-24	2004	3	Chironomidae	3	14.3541
Reference	2004-05-24	2004	3	Sciaridae	1	4.78469
Reference	2004-05-24	2004	3	Hymenoptera	1	4.78469
Reference	2004-05-24	2004	3	Hemiptera	1	4.78469
Reference	2004-05-24	2004	3	Coleoptera larva	2	9.56938
Reference	2004-05-24	2004	3	Insecta larva	19	90.9091
Reference	2004-05-24	2004	3	Diptera larva	9	43.0622
Reference	2004-05-24	2004	3	Lepidoptera larva	1	4.78469
Reference	2004-05-24	2004	4	Araneae	9	43.0622
Reference	2004-05-24	2004	4	Thysanoptera	1	4.78469
Reference	2004-05-24	2004	4	Acari	15	71.7703
Reference	2004-05-24	2004	4	Aphidoidea	131	626.794
Reference	2004-05-24	2004	4	Entomobryomorpha/Poduromorpha	38	181.818
Reference	2004-05-24	2004	4	Thysanoptera larva	7	33.4928
Reference	2004-05-24	2004	4	Hymenoptera	3	14.3541
Reference	2004-05-24	2004	4	Aphidoidea	7	33.4928
Reference	2004-05-24	2004	4	Psocoptera	1	4.78469
Reference	2004-05-24	2004	4	Hemiptera	5	23.9234
Reference	2004-05-24	2004	4	Chironomidae	4	19.1388
Reference	2004-05-24	2004	4	Sciaridae	2	9.56938
Reference	2004-05-24	2004	4	Cecidomyiidae	6	28.7081
Reference	2004-05-24	2004	4	Phoridae	1	4.78469
Reference	2004-05-24	2004	4	Tipulidae	1	4.78469
Reference	2004-05-24	2004	4	Anthomyiidae	1	4.78469
Reference	2004-05-24	2004	4	Insecta larva	12	57.4163
Reference	2004-05-24	2004	4	Chironomidae larva	4	19.1388
Reference	2004-05-24	2004	4	Hemiptera	1	4.78469
Reference	2004-05-24	2004	4	Hemiptera nymph	5	23.9234
Reference	2004-05-24	2004	5	Araneae	12	57.4163
Reference	2004-05-24	2004	5	Coleoptera	1	4.78469
Reference	2004-05-24	2004	5	Acari	23	110.048
Reference	2004-05-24	2004	5	Aphidoidea	58	277.512
Reference	2004-05-24	2004	5	Entomobryomorpha/Poduromorpha	32	153.11
Reference	2004-05-24	2004	5	Thysanoptera larva	3	14.3541
Reference	2004-05-24	2004	5	Sminthuridae	2	9.56938
Reference	2004-05-24	2004	5	Aphidoidea	7	33.4928
Reference	2004-05-24	2004	5	Psocoptera nymph	2	9.56938
Reference	2004-05-24	2004	5	Insecta larva	3	14.3541
Reference	2004-05-24	2004	5	Anthomyiidae	1	4.78469
Reference	2004-05-24	2004	5	Muscomorpha	1	4.78469
Reference	2004-05-24	2004	5	Phoridae	2	9.56938
Reference	2004-05-24	2004	5	Cecidomyiidae	11	52.6316
Reference	2004-05-24	2004	5	Psychodidae	1	4.78469
Reference	2004-05-24	2004	5	Sciaridae	1	4.78469
Reference	2004-05-24	2004	5	Chironomidae	4	19.1388
Reference	2004-05-24	2004	5	Hymenoptera	2	9.56938
Reference	2004-05-24	2004	5	Hemiptera	1	4.78469
Reference	2004-05-24	2004	5	Pseudoscorpiones	1	4.78469
Reference	2004-05-24	2004	5	Microcoryphia	1	4.78469
Reference	2004-05-24	2004	6	Araneae	12	57.4163
Reference	2004-05-24	2004	6	Coleoptera	2	9.56938
Reference	2004-05-24	2004	6	Sciaridae	2	9.56938
Reference	2004-05-24	2004	6	Microcoryphia	2	9.56938
Reference	2004-05-24	2004	6	Porcellio scaber	4	19.1388
Reference	2004-05-24	2004	6	Littorophiloscia richardsonae	3	14.3541
Reference	2004-05-24	2004	6	Aphidoidea	46	220.096
Reference	2004-05-24	2004	6	Entomobryomorpha/Poduromorpha	48	229.665
Reference	2004-05-24	2004	6	Sminthuridae	2	9.56938
Reference	2004-05-24	2004	6	Hemiptera nymph	3	14.3541
Reference	2004-05-24	2004	6	Aphidoidea	6	28.7081
Reference	2004-05-24	2004	6	Hemiptera	1	4.78469
Reference	2004-05-24	2004	6	Formicidae	1	4.78469
Reference	2004-05-24	2004	6	Delphacidae	2	9.56938
Reference	2004-05-24	2004	6	Hymenoptera	4	19.1388
Reference	2004-05-24	2004	6	Lepidoptera	1	4.78469
Reference	2004-05-24	2004	6	Scatopsidae	1	4.78469
Reference	2004-05-24	2004	6	Chironomidae	3	14.3541
Reference	2004-05-24	2004	6	Phoridae	1	4.78469
Reference	2004-05-24	2004	6	Dixidae	1	4.78469
Reference	2004-05-24	2004	6	Mycetophilidae	1	4.78469
Reference	2004-05-24	2004	6	Insecta larva	3	14.3541
Reference	2004-05-24	2004	6	Cecidomyiidae	1	4.78469
Reference	2004-05-24	2004	7	Araneae	6	28.7081
Reference	2004-05-24	2004	7	Coleoptera	3	14.3541
Reference	2004-05-24	2004	7	Porcellio scaber	1	4.78469
Reference	2004-05-24	2004	7	Littorophiloscia richardsonae	2	9.56938
Reference	2004-05-24	2004	7	Aphidoidea	3	14.3541
Reference	2004-05-24	2004	7	Entomobryomorpha/Poduromorpha	42	200.957
Reference	2004-05-24	2004	7	Sminthuridae	2	9.56938
Reference	2004-05-24	2004	7	Acari	55	263.158
Reference	2004-05-24	2004	7	Aphidoidea	71	339.713
Reference	2004-05-24	2004	7	Lauxaniidae	2	9.56938
Reference	2004-05-24	2004	7	Muscomorpha	2	9.56938
Reference	2004-05-24	2004	7	Tipulidae	1	4.78469
Reference	2004-05-24	2004	7	Sciaridae	3	14.3541
Reference	2004-05-24	2004	7	Chironomidae	4	19.1388
Reference	2004-05-24	2004	7	Psychodidae	2	9.56938
Reference	2004-05-24	2004	7	Cecidomyiidae	5	23.9234
Reference	2004-05-24	2004	7	Anisopodidae	1	4.78469
Reference	2004-05-24	2004	7	Hemiptera nymph	2	9.56938
Reference	2004-05-24	2004	7	Thysanoptera larva	1	4.78469
Reference	2004-05-24	2004	7	Thysanoptera	1	4.78469
Reference	2004-05-24	2004	7	Hymenoptera	1	4.78469
Reference	2004-05-24	2004	7	Delphacidae	2	9.56938
Reference	2004-06-07	2004	1	Araneae	5	23.9234
Reference	2004-06-07	2004	1	Coleoptera	1	4.78469
Reference	2004-06-07	2004	1	Microcoryphia	2	9.56938
Reference	2004-06-07	2004	1	Coleoptera larva	51	244.019
Reference	2004-06-07	2004	1	Acari	6	28.7081
Reference	2004-06-07	2004	1	Entomobryomorpha/Poduromorpha	22	105.263
Reference	2004-06-07	2004	1	Hemiptera nymph	8	38.2775
Reference	2004-06-07	2004	1	Hemiptera nymph	19	90.9091
Reference	2004-06-07	2004	1	Aphidoidea	11	52.6316
Reference	2004-06-07	2004	1	Psocoptera nymph	1	4.78469
Reference	2004-06-07	2004	1	Hymenoptera	1	4.78469
Reference	2004-06-07	2004	1	Aphidoidea	7	33.4928
Reference	2004-06-07	2004	1	Thysanoptera	2	9.56938
Reference	2004-06-07	2004	1	Sminthuridae	1	4.78469
Reference	2004-06-07	2004	1	Hemiptera	4	19.1388
Reference	2004-06-07	2004	1	Chironomidae	8	38.2775
Reference	2004-06-07	2004	1	Sciaridae	1	4.78469
Reference	2004-06-07	2004	1	Cecidomyiidae	10	47.8469
Reference	2004-06-07	2004	1	Muscomorpha	1	4.78469
Reference	2004-06-07	2004	1	Insecta	1	4.78469
Reference	2004-06-07	2004	2	Coleoptera larva	30	143.541
Reference	2004-06-07	2004	2	Araneae	7	33.4928
Reference	2004-06-07	2004	2	Formicidae	1	4.78469
Reference	2004-06-07	2004	2	Littorophiloscia richardsonae	1	4.78469
Reference	2004-06-07	2004	2	Aphidoidea	17	81.3397
Reference	2004-06-07	2004	2	Acari	46	220.096
Reference	2004-06-07	2004	2	Entomobryomorpha/Poduromorpha	22	105.263
Reference	2004-06-07	2004	2	Aphidoidea	17	81.3397
Reference	2004-06-07	2004	2	Hemiptera nymph	6	28.7081
Reference	2004-06-07	2004	2	Cicadellidae	11	52.6316
Reference	2004-06-07	2004	2	Thysanoptera	1	4.78469
Reference	2004-06-07	2004	2	Hemiptera nymph	1	4.78469
Reference	2004-06-07	2004	2	Chironomidae	2	9.56938
Reference	2004-06-07	2004	2	Cecidomyiidae	13	62.201
Reference	2004-06-07	2004	2	Mycetophilidae	1	4.78469
Reference	2004-06-07	2004	2	Sciaridae	1	4.78469
Reference	2004-06-07	2004	2	Psychodidae	2	9.56938
Reference	2004-06-07	2004	3	Araneae	7	33.4928
Reference	2004-06-07	2004	3	Microcoryphia	2	9.56938
Reference	2004-06-07	2004	3	Coleoptera larva	9	43.0622
Reference	2004-06-07	2004	3	Littorophiloscia richardsonae	1	4.78469
Reference	2004-06-07	2004	3	Thysanoptera	1	4.78469
Reference	2004-06-07	2004	3	Acari	9	43.0622
Reference	2004-06-07	2004	3	Entomobryomorpha/Poduromorpha	52	248.804
Reference	2004-06-07	2004	3	Sminthuridae	1	4.78469
Reference	2004-06-07	2004	3	Hemiptera nymph	1	4.78469
Reference	2004-06-07	2004	3	Hemiptera nymph	4	19.1388
Reference	2004-06-07	2004	3	Aphidoidea	22	105.263
Reference	2004-06-07	2004	3	Psocoptera nymph	2	9.56938
Reference	2004-06-07	2004	3	Cicadellidae	4	19.1388
Reference	2004-06-07	2004	3	Aphidoidea	4	19.1388
Reference	2004-06-07	2004	3	Psocoptera	1	4.78469
Reference	2004-06-07	2004	3	Hymenoptera	2	9.56938
Reference	2004-06-07	2004	3	Empididae	2	9.56938
Reference	2004-06-07	2004	3	Psocoptera	1	4.78469
Reference	2004-06-07	2004	3	Lauxaniidae	1	4.78469
Reference	2004-06-07	2004	3	Muscomorpha	2	9.56938
Reference	2004-06-07	2004	3	Cecidomyiidae	21	100.478
Reference	2004-06-07	2004	3	Chironomidae	7	33.4928
Reference	2004-06-07	2004	3	Sciaridae	4	19.1388
Reference	2004-06-07	2004	3	Tipulidae	1	4.78469
Reference	2004-06-07	2004	4	Araneae	8	38.2775
Reference	2004-06-07	2004	4	Coleoptera	5	23.9234
Reference	2004-06-07	2004	4	Coleoptera larva	25	119.617
Reference	2004-06-07	2004	4	Diptera larva	35	167.464
Reference	2004-06-07	2004	4	Thysanoptera larva	1	4.78469
Reference	2004-06-07	2004	4	Thysanoptera	3	14.3541
Reference	2004-06-07	2004	4	Porcellio scaber	1	4.78469
Reference	2004-06-07	2004	4	Cicadellidae nymph	2	9.56938
Reference	2004-06-07	2004	4	Cicadellidae	3	14.3541
Reference	2004-06-07	2004	4	Hemiptera nymph	1	4.78469
Reference	2004-06-07	2004	4	Acari	11	52.6316
Reference	2004-06-07	2004	4	Entomobryomorpha/Poduromorpha	37	177.033
Reference	2004-06-07	2004	4	Sminthuridae	6	28.7081
Reference	2004-06-07	2004	4	Aphidoidea	13	62.201
Reference	2004-06-07	2004	4	Chironomidae	3	14.3541
Reference	2004-06-07	2004	4	Tachinidae	2	9.56938
Reference	2004-06-07	2004	4	Muscomorpha	1	4.78469
Reference	2004-06-07	2004	4	Cecidomyiidae	7	33.4928
Reference	2004-06-07	2004	4	Ephydridae	1	4.78469
Reference	2004-06-07	2004	4	Psychodidae	1	4.78469
Reference	2004-06-07	2004	5	Coleoptera larva	31	148.325
Reference	2004-06-07	2004	5	Coleoptera	6	28.7081
Reference	2004-06-07	2004	5	Araneae	3	14.3541
Reference	2004-06-07	2004	5	Psocoptera nymph	1	4.78469
Reference	2004-06-07	2004	5	Therevidae	1	4.78469
Reference	2004-06-07	2004	5	Psocoptera	1	4.78469
Reference	2004-06-07	2004	5	Hemiptera	1	4.78469
Reference	2004-06-07	2004	5	Acari	9	43.0622
Reference	2004-06-07	2004	5	Entomobryomorpha/Poduromorpha	28	133.971
Reference	2004-06-07	2004	5	Sminthuridae	3	14.3541
Reference	2004-06-07	2004	5	Aphidoidea	33	157.895
Reference	2004-06-07	2004	5	Aphidoidea	9	43.0622
Reference	2004-06-07	2004	5	Cicadellidae	4	19.1388
Reference	2004-06-07	2004	5	Hemiptera nymph	1	4.78469
Reference	2004-06-07	2004	5	Hymenoptera	1	4.78469
Reference	2004-06-07	2004	5	Cecidomyiidae	10	47.8469
Reference	2004-06-07	2004	5	Sciaridae	2	9.56938
Reference	2004-06-07	2004	5	Chironomidae	7	33.4928
Reference	2004-06-07	2004	5	Phoridae	1	4.78469
Reference	2004-06-07	2004	5	Psychodidae	1	4.78469
Reference	2004-06-07	2004	5	Muscomorpha	1	4.78469
Reference	2004-06-07	2004	5	Anthomyiidae	1	4.78469
Reference	2004-06-07	2004	6	Araneae	3	14.3541
Reference	2004-06-07	2004	6	Coleoptera	1	4.78469
Reference	2004-06-07	2004	6	Chironomidae	2	9.56938
Reference	2004-06-07	2004	6	Acari	17	81.3397
Reference	2004-06-07	2004	6	Coleoptera larva	11	52.6316
Reference	2004-06-07	2004	6	Orthoptera	1	4.78469
Reference	2004-06-07	2004	6	Littorophiloscia richardsonae	1	4.78469
Reference	2004-06-07	2004	6	Tipulidae	1	4.78469
Reference	2004-06-07	2004	6	Entomobryomorpha/Poduromorpha	115	550.239
Reference	2004-06-07	2004	6	Sminthuridae	3	14.3541
Reference	2004-06-07	2004	6	Aphidoidea	5	23.9234
Reference	2004-06-07	2004	6	Hemiptera nymph	4	19.1388
Reference	2004-06-07	2004	6	Psocoptera nymph	4	19.1388
Reference	2004-06-07	2004	6	Cicadellidae	4	19.1388
Reference	2004-06-07	2004	6	Hemiptera	1	4.78469
Reference	2004-06-07	2004	6	Aphidoidea	8	38.2775
Reference	2004-06-07	2004	6	Thysanoptera	1	4.78469
Reference	2004-06-07	2004	6	Thysanoptera larva	1	4.78469
Reference	2004-06-07	2004	6	Plecoptera	1	4.78469
Reference	2004-06-07	2004	6	Lauxaniidae	1	4.78469
Reference	2004-06-07	2004	6	Psocoptera	1	4.78469
Reference	2004-06-07	2004	6	Sciaridae	3	14.3541
Reference	2004-06-07	2004	6	Mycetophilidae	1	4.78469
Reference	2004-06-07	2004	6	Phoridae	1	4.78469
Reference	2004-06-07	2004	6	Cecidomyiidae	8	38.2775
Reference	2004-06-07	2004	7	Araneae	2	9.56938
Reference	2004-06-07	2004	7	Coleoptera	4	19.1388
Reference	2004-06-07	2004	7	Coleoptera larva	4	19.1388
Reference	2004-06-07	2004	7	Cicadellidae	1	4.78469
Reference	2004-06-07	2004	7	Acari	10	47.8469
Reference	2004-06-07	2004	7	Entomobryomorpha/Poduromorpha	84	401.914
Reference	2004-06-07	2004	7	Sminthuridae	1	4.78469
Reference	2004-06-07	2004	7	Hemiptera nymph	8	38.2775
Reference	2004-06-07	2004	7	Aphidoidea	9	43.0622
Reference	2004-06-07	2004	7	Hymenoptera	4	19.1388
Reference	2004-06-07	2004	7	Psocoptera	3	14.3541
Reference	2004-06-07	2004	7	Thysanoptera	1	4.78469
Reference	2004-06-07	2004	7	Coleoptera larva	1	4.78469
Reference	2004-06-07	2004	7	Aphidoidea	3	14.3541
Reference	2004-06-07	2004	7	Cecidomyiidae	22	105.263
Reference	2004-06-07	2004	7	Psocoptera	1	4.78469
Reference	2004-06-07	2004	7	Phoridae	1	4.78469
Reference	2004-06-07	2004	7	Sciaridae	1	4.78469
Reference	2004-06-07	2004	7	Chironomidae	1	4.78469
Reference	2004-06-07	2004	7	Mycetophilidae	2	9.56938
Reference	2004-06-07	2004	7	Zoraptera	2	9.56938
Reference	2004-06-07	2004	7	Chloropidae	1	4.78469
Restored	2004-06-07	2004	1	Acari	22	105.263
Restored	2004-06-07	2004	1	Araneae	1	4.78469
Restored	2004-06-07	2004	1	Sminthuridae	1	4.78469
Restored	2004-06-07	2004	1	Tachinidae	2	9.56938
Restored	2004-06-07	2004	1	Muscomorpha	2	9.56938
Restored	2004-06-07	2004	1	Chironomidae	3	14.3541
Restored	2004-06-07	2004	1	Lepidoptera	1	4.78469
Restored	2004-06-07	2004	2	Chironomidae	5	23.9234
Restored	2004-06-07	2004	2	Coleoptera	1	4.78469
Restored	2004-06-07	2004	2	Araneae	1	4.78469
Restored	2004-06-07	2004	2	Entomobryomorpha/Poduromorpha	2	9.56938
Restored	2004-06-07	2004	2	Acari	3	14.3541
Restored	2004-06-07	2004	2	Dolichopodidae	1	4.78469
Restored	2004-06-07	2004	2	Sciaridae	2	9.56938
Restored	2004-06-07	2004	2	Aphidoidea	1	4.78469
Restored	2004-06-07	2004	2	Hemiptera	1	4.78469
Restored	2004-06-07	2004	2	Hemiptera	1	4.78469
Restored	2004-06-07	2004	2	Tachinidae	1	4.78469
Restored	2004-06-07	2004	2	Muscomorpha	2	9.56938
Restored	2004-06-07	2004	2	Sarcophagidae	1	4.78469
Restored	2004-06-07	2004	2	Lepidoptera	1	4.78469
Restored	2004-06-07	2004	2	Isoptera	1	4.78469
Restored	2004-06-07	2004	3	Acari	1	4.78469
Restored	2004-06-07	2004	3	Phoridae	1	4.78469
Restored	2004-06-07	2004	3	Psocoptera nymph	1	4.78469
Restored	2004-06-07	2004	3	Chironomidae	3	14.3541
Restored	2004-06-07	2004	3	Sciaridae	2	9.56938
Restored	2004-06-07	2004	3	Hymenoptera	1	4.78469
Restored	2004-06-07	2004	3	Neuroptera	1	4.78469
Restored	2004-06-07	2004	4	Acari	15	71.7703
Restored	2004-06-07	2004	4	Sminthuridae	3	14.3541
Restored	2004-06-07	2004	4	Entomobryomorpha/Poduromorpha	2	9.56938
Restored	2004-06-07	2004	4	Chironomidae	2	9.56938
Restored	2004-06-07	2004	4	Hemiptera	1	4.78469
Restored	2004-06-07	2004	4	Hemiptera	2	9.56938
Restored	2004-06-07	2004	4	Aphidoidea	1	4.78469
Restored	2004-06-07	2004	4	Psychodidae	1	4.78469
Restored	2004-06-07	2004	4	Sciaridae	1	4.78469
Restored	2004-06-07	2004	5	Araneae	1	4.78469
Restored	2004-06-07	2004	5	Acari	2	9.56938
Restored	2004-06-07	2004	5	Entomobryomorpha/Poduromorpha	1	4.78469
Restored	2004-06-07	2004	5	Thysanoptera	1	4.78469
Restored	2004-06-07	2004	5	Psocoptera	1	4.78469
Restored	2004-06-07	2004	5	Psychodidae	1	4.78469
Restored	2004-06-07	2004	5	Cecidomyiidae	1	4.78469
Restored	2004-06-07	2004	5	Aphidoidea	1	4.78469
Restored	2004-06-07	2004	5	Tipulidae	1	4.78469
Restored	2004-06-07	2004	5	Chironomidae	2	9.56938
Restored	2004-06-07	2004	6	Hemiptera	1	4.78469
Restored	2004-06-07	2004	6	Cicadellidae	1	4.78469
Restored	2004-06-07	2004	6	Aphidoidea	1	4.78469
Restored	2004-06-07	2004	6	Aphidoidea	1	4.78469
Restored	2004-06-07	2004	6	Psocoptera nymph	2	9.56938
Restored	2004-06-07	2004	6	Ceratopogonidae	1	4.78469
Restored	2004-06-07	2004	6	Chironomidae	1	4.78469
Restored	2004-06-07	2004	6	Cecidomyiidae	2	9.56938
Restored	2004-06-07	2004	7	Acari	2	9.56938
Restored	2004-06-07	2004	7	Hymenoptera	2	9.56938
Restored	2004-06-07	2004	7	Aphidoidea	1	4.78469
Restored	2004-06-07	2004	7	Chironomidae	1	4.78469
Restored	2004-06-07	2004	7	Sciaridae	1	4.78469
Restored	2004-06-07	2004	7	Cecidomyiidae	2	9.56938
Restored	2004-06-07	2004	7	Psocoptera	1	4.78469
Restored	2004-06-07	2004	7	Muscomorpha	1	4.78469
Reference	2004-06-14	2004	1	Araneae	2	9.56938
Reference	2004-06-14	2004	1	Coleoptera	3	14.3541
Reference	2004-06-14	2004	1	Chironomidae	7	33.4928
Reference	2004-06-14	2004	1	Formicidae	2	9.56938
Reference	2004-06-14	2004	1	Psychodidae	1	4.78469
Reference	2004-06-14	2004	1	Psocoptera nymph	2	9.56938
Reference	2004-06-14	2004	1	Hymenoptera	1	4.78469
Reference	2004-06-14	2004	1	Psocoptera	4	19.1388
Reference	2004-06-14	2004	1	Coleoptera larva	1	4.78469
Reference	2004-06-14	2004	1	Cecidomyiidae	23	110.048
Reference	2004-06-14	2004	1	Hemiptera nymph	1	4.78469
Reference	2004-06-14	2004	1	Psocoptera nymph	1	4.78469
Reference	2004-06-14	2004	1	Aphidoidea	4	19.1388
Reference	2004-06-14	2004	1	Aphidoidea	15	71.7703
Reference	2004-06-14	2004	1	Cicadellidae	2	9.56938
Reference	2004-06-14	2004	1	Cicadellidae nymph	3	14.3541
Reference	2004-06-14	2004	1	Phoridae	5	23.9234
Reference	2004-06-14	2004	1	Sciaridae	3	14.3541
Reference	2004-06-14	2004	1	Lauxaniidae	3	14.3541
Reference	2004-06-14	2004	1	Acari	13	62.201
Reference	2004-06-14	2004	1	Entomobryomorpha/Poduromorpha	57	272.727
Reference	2004-06-14	2004	1	Sminthuridae	1	4.78469
Reference	2004-06-14	2004	1	Hemiptera nymph	4	19.1388
Reference	2004-06-14	2004	1	Coleoptera larva	7	33.4928
Reference	2004-06-14	2004	2	Coleoptera larva	1	4.78469
Reference	2004-06-14	2004	2	Coleoptera larva	12	57.4163
Reference	2004-06-14	2004	2	Psocoptera nymph	2	9.56938
Reference	2004-06-14	2004	2	Acari	9	43.0622
Reference	2004-06-14	2004	2	Entomobryomorpha/Poduromorpha	26	124.402
Reference	2004-06-14	2004	2	Hemiptera nymph	2	9.56938
Reference	2004-06-14	2004	2	Aphidoidea	7	33.4928
Reference	2004-06-14	2004	2	Xylophagidae	1	4.78469
Reference	2004-06-14	2004	2	Cicadellidae	2	9.56938
Reference	2004-06-14	2004	2	Cicadellidae nymph	2	9.56938
Reference	2004-06-14	2004	2	Psocoptera	1	4.78469
Reference	2004-06-14	2004	2	Cecidomyiidae	13	62.201
Reference	2004-06-14	2004	2	Chironomidae	2	9.56938
Reference	2004-06-14	2004	2	Phoridae	3	14.3541
Reference	2004-06-14	2004	2	Ephydridae	1	4.78469
Reference	2004-06-14	2004	2	Empididae	2	9.56938
Reference	2004-06-14	2004	2	Muscomorpha	1	4.78469
Reference	2004-06-14	2004	2	Tachinidae	1	4.78469
Reference	2004-06-14	2004	2	Anthomyiidae	1	4.78469
Reference	2004-06-14	2004	3	Araneae	3	14.3541
Reference	2004-06-14	2004	3	Coleoptera	2	9.56938
Reference	2004-06-14	2004	3	Lepidoptera	1	4.78469
Reference	2004-06-14	2004	3	Psychodidae	4	19.1388
Reference	2004-06-14	2004	3	Thysanoptera	2	9.56938
Reference	2004-06-14	2004	3	Psocoptera nymph	1	4.78469
Reference	2004-06-14	2004	3	Hemiptera	1	4.78469
Reference	2004-06-14	2004	3	Chironomidae	5	23.9234
Reference	2004-06-14	2004	3	Ceratopogonidae	18	86.1244
Reference	2004-06-14	2004	3	Aphidoidea	1	4.78469
Reference	2004-06-14	2004	3	Hemiptera nymph	3	14.3541
Reference	2004-06-14	2004	3	Cicadellidae	2	9.56938
Reference	2004-06-14	2004	3	Hemiptera	2	9.56938
Reference	2004-06-14	2004	3	Sciaridae	3	14.3541
Reference	2004-06-14	2004	3	Phoridae	3	14.3541
Reference	2004-06-14	2004	3	Mycetophilidae	1	4.78469
Reference	2004-06-14	2004	3	Chloropidae	1	4.78469
Reference	2004-06-14	2004	3	Acari	5	23.9234
Reference	2004-06-14	2004	3	Entomobryomorpha/Poduromorpha	47	224.88
Reference	2004-06-14	2004	3	Sminthuridae	1	4.78469
Reference	2004-06-14	2004	3	Aphidoidea	10	47.8469
Reference	2004-06-14	2004	3	Hemiptera nymph	1	4.78469
Reference	2004-06-14	2004	3	Muscomorpha	1	4.78469
Reference	2004-06-14	2004	3	Anthomyiidae	2	9.56938
Reference	2004-06-14	2004	3	Tachinidae	1	4.78469
Reference	2004-06-14	2004	3	Coleoptera	2	9.56938
Reference	2004-06-14	2004	4	Araneae	3	14.3541
Reference	2004-06-14	2004	4	Coleoptera	2	9.56938
Reference	2004-06-14	2004	4	Phoridae	4	19.1388
Reference	2004-06-14	2004	4	Hymenoptera	2	9.56938
Reference	2004-06-14	2004	4	Psychodidae	2	9.56938
Reference	2004-06-14	2004	4	Sciaridae	6	28.7081
Reference	2004-06-14	2004	4	Thysanoptera	2	9.56938
Reference	2004-06-14	2004	4	Ceratopogonidae	19	90.9091
Reference	2004-06-14	2004	4	Psocoptera nymph	2	9.56938
Reference	2004-06-14	2004	4	Coleoptera larva	4	19.1388
Reference	2004-06-14	2004	4	Coleoptera larva	6	28.7081
Reference	2004-06-14	2004	4	Diptera larva	2	9.56938
Reference	2004-06-14	2004	4	Hemiptera	1	4.78469
Reference	2004-06-14	2004	4	Hemiptera nymph	4	19.1388
Reference	2004-06-14	2004	4	Cicadellidae	3	14.3541
Reference	2004-06-14	2004	4	Aphidoidea	4	19.1388
Reference	2004-06-14	2004	4	Chironomidae	3	14.3541
Reference	2004-06-14	2004	4	Muscomorpha	1	4.78469
Reference	2004-06-14	2004	4	Tachinidae	2	9.56938
Reference	2004-06-14	2004	4	Acari	5	23.9234
Reference	2004-06-14	2004	4	Entomobryomorpha/Poduromorpha	23	110.048
Reference	2004-06-14	2004	4	Sminthuridae	1	4.78469
Reference	2004-06-14	2004	4	Hemiptera nymph	2	9.56938
Reference	2004-06-14	2004	4	Hemiptera nymph	6	28.7081
Reference	2004-06-14	2004	4	Aphidoidea	10	47.8469
Reference	2004-06-14	2004	5	Muscomorpha	1	4.78469
Reference	2004-06-14	2004	5	Coleoptera larva	1	4.78469
Reference	2004-06-14	2004	5	Psocoptera nymph	4	19.1388
Reference	2004-06-14	2004	5	Acari	13	62.201
Reference	2004-06-14	2004	5	Entomobryomorpha/Poduromorpha	13	62.201
Reference	2004-06-14	2004	5	Hemiptera nymph	9	43.0622
Reference	2004-06-14	2004	5	Aphidoidea	4	19.1388
Reference	2004-06-14	2004	5	Tephritidae	1	4.78469
Reference	2004-06-14	2004	5	Coleoptera	2	9.56938
Reference	2004-06-14	2004	5	Coleoptera larva	3	14.3541
Reference	2004-06-14	2004	5	Ceratopogonidae	12	57.4163
Reference	2004-06-14	2004	5	Cicadellidae nymph	3	14.3541
Reference	2004-06-14	2004	5	Cicadellidae	1	4.78469
Reference	2004-06-14	2004	5	Hemiptera nymph	1	4.78469
Reference	2004-06-14	2004	5	Psychodidae	1	4.78469
Reference	2004-06-14	2004	5	Chironomidae	5	23.9234
Reference	2004-06-14	2004	5	Sciaridae	2	9.56938
Reference	2004-06-14	2004	5	Trixoscelididae	2	9.56938
Reference	2004-06-14	2004	5	Anthomyiidae	2	9.56938
Reference	2004-06-14	2004	6	Araneae	9	43.0622
Reference	2004-06-14	2004	6	Acari	15	71.7703
Reference	2004-06-14	2004	6	Entomobryomorpha/Poduromorpha	162	775.12
Reference	2004-06-14	2004	6	Sminthuridae	3	14.3541
Reference	2004-06-14	2004	6	Hemiptera nymph	5	23.9234
Reference	2004-06-14	2004	6	Aphidoidea	4	19.1388
Reference	2004-06-14	2004	6	Hemiptera nymph	2	9.56938
Reference	2004-06-14	2004	6	Psocoptera nymph	3	14.3541
Reference	2004-06-14	2004	6	Coleoptera larva	2	9.56938
Reference	2004-06-14	2004	6	Coleoptera	2	9.56938
Reference	2004-06-14	2004	6	Aphidoidea	2	9.56938
Reference	2004-06-14	2004	6	Cicadellidae	3	14.3541
Reference	2004-06-14	2004	6	Psocoptera	1	4.78469
Reference	2004-06-14	2004	6	Cecidomyiidae	26	124.402
Reference	2004-06-14	2004	6	Sciaridae	4	19.1388
Reference	2004-06-14	2004	6	Chironomidae	6	28.7081
Reference	2004-06-14	2004	6	Phoridae	1	4.78469
Reference	2004-06-14	2004	6	Dolichopodidae	3	14.3541
Reference	2004-06-14	2004	6	Tipulidae	2	9.56938
Reference	2004-06-14	2004	6	Hymenoptera	1	4.78469
Reference	2004-06-14	2004	6	Muscomorpha	1	4.78469
Reference	2004-06-14	2004	6	Tachinidae	1	4.78469
Reference	2004-06-14	2004	7	Hymenoptera	2	9.56938
Reference	2004-06-14	2004	7	Araneae	1	4.78469
Reference	2004-06-14	2004	7	Coleoptera	3	14.3541
Reference	2004-06-14	2004	7	Acari	6	28.7081
Reference	2004-06-14	2004	7	Entomobryomorpha/Poduromorpha	75	358.852
Reference	2004-06-14	2004	7	Sminthuridae	2	9.56938
Reference	2004-06-14	2004	7	Aphidoidea	4	19.1388
Reference	2004-06-14	2004	7	Psocoptera nymph	1	4.78469
Reference	2004-06-14	2004	7	Thysanoptera	2	9.56938
Reference	2004-06-14	2004	7	Hemiptera nymph	1	4.78469
Reference	2004-06-14	2004	7	Cecidomyiidae	29	138.756
Reference	2004-06-14	2004	7	Cicadellidae nymph	4	19.1388
Reference	2004-06-14	2004	7	Aphidoidea	3	14.3541
Reference	2004-06-14	2004	7	Psychodidae	1	4.78469
Reference	2004-06-14	2004	7	Sciaridae	2	9.56938
Reference	2004-06-14	2004	7	Dolichopodidae	1	4.78469
Reference	2004-06-14	2004	7	Muscomorpha	5	23.9234
Restored	2004-06-14	2004	1	Araneae	1	4.78469
Restored	2004-06-14	2004	1	Entomobryomorpha/Poduromorpha	1	4.78469
Restored	2004-06-14	2004	1	Acari	3	14.3541
Restored	2004-06-14	2004	1	Thysanoptera	2	9.56938
Restored	2004-06-14	2004	1	Aphidoidea	1	4.78469
Restored	2004-06-14	2004	1	Chironomidae	8	38.2775
Restored	2004-06-14	2004	1	Sciaridae	1	4.78469
Restored	2004-06-14	2004	1	Hemiptera nymph	1	4.78469
Restored	2004-06-14	2004	1	Psocoptera nymph	1	4.78469
Restored	2004-06-14	2004	2	Entomobryomorpha/Poduromorpha	1	4.78469
Restored	2004-06-14	2004	2	Dolichopodidae	2	9.56938
Restored	2004-06-14	2004	2	Chironomidae	2	9.56938
Restored	2004-06-14	2004	2	Hemiptera	1	4.78469
Restored	2004-06-14	2004	2	Cecidomyiidae	1	4.78469
Restored	2004-06-14	2004	2	Ceratopogonidae	3	14.3541
Restored	2004-06-14	2004	2	Sciaridae	1	4.78469
Restored	2004-06-14	2004	2	Tachinidae	1	4.78469
Restored	2004-06-14	2004	3	Sminthuridae	1	4.78469
Restored	2004-06-14	2004	3	Acari	1	4.78469
Restored	2004-06-14	2004	3	Sciaridae	3	14.3541
Restored	2004-06-14	2004	3	Psychodidae	1	4.78469
Restored	2004-06-14	2004	3	Psocoptera nymph	1	4.78469
Restored	2004-06-14	2004	3	Ceratopogonidae	1	4.78469
Restored	2004-06-14	2004	3	Aphidoidea	1	4.78469
Restored	2004-06-14	2004	3	Chironomidae	3	14.3541
Restored	2004-06-14	2004	3	Thysanoptera	1	4.78469
Restored	2004-06-14	2004	3	Cecidomyiidae	1	4.78469
Restored	2004-06-14	2004	3	Hymenoptera	1	4.78469
Restored	2004-06-14	2004	4	Acari	1	4.78469
Restored	2004-06-14	2004	4	Entomobryomorpha/Poduromorpha	2	9.56938
Restored	2004-06-14	2004	4	Cecidomyiidae	1	4.78469
Restored	2004-06-14	2004	4	Sciaridae	1	4.78469
Restored	2004-06-14	2004	4	Ceratopogonidae	1	4.78469
Restored	2004-06-14	2004	4	Psocoptera nymph	1	4.78469
Restored	2004-06-14	2004	5	Araneae	1	4.78469
Restored	2004-06-14	2004	5	Acari	3	14.3541
Restored	2004-06-14	2004	5	Entomobryomorpha/Poduromorpha	3	14.3541
Restored	2004-06-14	2004	5	Thysanoptera	1	4.78469
Restored	2004-06-14	2004	5	Sciaridae	1	4.78469
Restored	2004-06-14	2004	5	Cecidomyiidae	1	4.78469
Restored	2004-06-14	2004	5	Chironomidae	3	14.3541
Restored	2004-06-14	2004	5	Hemiptera nymph	4	19.1388
Restored	2004-06-14	2004	5	Psocoptera nymph	1	4.78469
Restored	2004-06-14	2004	5	Psocoptera	1	4.78469
Restored	2004-06-14	2004	5	Mycetophilidae	1	4.78469
Restored	2004-06-14	2004	6	Hymenoptera	1	4.78469
Restored	2004-06-14	2004	6	Entomobryomorpha/Poduromorpha	1	4.78469
Restored	2004-06-14	2004	6	Acari	1	4.78469
Restored	2004-06-14	2004	6	Hemiptera nymph	1	4.78469
Restored	2004-06-14	2004	6	Lepidoptera	1	4.78469
Restored	2004-06-14	2004	6	Cecidomyiidae	3	14.3541
Restored	2004-06-14	2004	6	Psocoptera nymph	3	14.3541
Restored	2004-06-14	2004	6	Chironomidae	2	9.56938
Restored	2004-06-14	2004	6	Aphidoidea	1	4.78469
Restored	2004-06-14	2004	7	Acari	4	19.1388
Restored	2004-06-14	2004	7	Entomobryomorpha/Poduromorpha	2	9.56938
Restored	2004-06-14	2004	7	Hymenoptera	1	4.78469
Restored	2004-06-14	2004	7	Araneae	1	4.78469
Restored	2004-06-14	2004	7	Coleoptera larva	3	14.3541
Restored	2004-06-14	2004	7	Hemiptera nymph	2	9.56938
Restored	2004-06-14	2004	7	Chironomidae	2	9.56938
Restored	2004-06-14	2004	7	Cecidomyiidae	1	4.78469
Reference	2004-06-21	2004	1	Araneae	11	52.6316
Reference	2004-06-21	2004	1	Formicidae	7	33.4928
Reference	2004-06-21	2004	1	Coleoptera	4	19.1388
Reference	2004-06-21	2004	1	Hemiptera	3	14.3541
Reference	2004-06-21	2004	1	Hemiptera nymph	1	4.78469
Reference	2004-06-21	2004	1	Pseudoscorpiones	1	4.78469
Reference	2004-06-21	2004	1	Cicadellidae nymph	1	4.78469
Reference	2004-06-21	2004	1	Coleoptera larva	1	4.78469
Reference	2004-06-21	2004	1	Cicadellidae	2	9.56938
Reference	2004-06-21	2004	1	Psocoptera	1	4.78469
Reference	2004-06-21	2004	1	Psychodidae	1	4.78469
Reference	2004-06-21	2004	1	Cecidomyiidae	2	9.56938
Reference	2004-06-21	2004	1	Chironomidae	1	4.78469
Reference	2004-06-21	2004	1	Sciaridae	1	4.78469
Reference	2004-06-21	2004	1	Tipulidae	2	9.56938
Reference	2004-06-21	2004	1	Thysanoptera	2	9.56938
Reference	2004-06-21	2004	1	Phoridae	1	4.78469
Reference	2004-06-21	2004	1	Chloropidae	4	19.1388
Reference	2004-06-21	2004	1	Acari	9	43.0622
Reference	2004-06-21	2004	1	Entomobryomorpha/Poduromorpha	28	133.971
Reference	2004-06-21	2004	1	Aphidoidea	1	4.78469
Reference	2004-06-21	2004	2	Araneae	3	14.3541
Reference	2004-06-21	2004	2	Chironomidae	5	23.9234
Reference	2004-06-21	2004	2	Coleoptera	2	9.56938
Reference	2004-06-21	2004	2	Pseudoscorpiones	1	4.78469
Reference	2004-06-21	2004	2	Aphidoidea	1	4.78469
Reference	2004-06-21	2004	2	Cicadellidae	2	9.56938
Reference	2004-06-21	2004	2	Hemiptera nymph	3	14.3541
Reference	2004-06-21	2004	2	Hemiptera nymph	1	4.78469
Reference	2004-06-21	2004	2	Sminthuridae	1	4.78469
Reference	2004-06-21	2004	2	Entomobryomorpha/Poduromorpha	42	200.957
Reference	2004-06-21	2004	2	Acari	9	43.0622
Reference	2004-06-21	2004	2	Psocoptera	2	9.56938
Reference	2004-06-21	2004	2	Hemiptera	1	4.78469
Reference	2004-06-21	2004	2	Cecidomyiidae	4	19.1388
Reference	2004-06-21	2004	2	Psychodidae	2	9.56938
Reference	2004-06-21	2004	2	Phoridae	3	14.3541
Reference	2004-06-21	2004	2	Tipulidae	1	4.78469
Reference	2004-06-21	2004	2	Chloropidae	12	57.4163
Reference	2004-06-21	2004	2	Anthomyiidae	3	14.3541
Reference	2004-06-21	2004	2	Muscomorpha	2	9.56938
Reference	2004-06-21	2004	3	Araneae	3	14.3541
Reference	2004-06-21	2004	3	Sciaridae	6	28.7081
Reference	2004-06-21	2004	3	Microcoryphia	2	9.56938
Reference	2004-06-21	2004	3	Coleoptera larva	1	4.78469
Reference	2004-06-21	2004	3	Hemiptera	1	4.78469
Reference	2004-06-21	2004	3	Cecidomyiidae	8	38.2775
Reference	2004-06-21	2004	3	Phoridae	2	9.56938
Reference	2004-06-21	2004	3	Tipulidae	1	4.78469
Reference	2004-06-21	2004	3	Chloropidae	5	23.9234
Reference	2004-06-21	2004	3	Muscomorpha	1	4.78469
Reference	2004-06-21	2004	3	Acari	2	9.56938
Reference	2004-06-21	2004	3	Entomobryomorpha/Poduromorpha	23	110.048
Reference	2004-06-21	2004	3	Sminthuridae	1	4.78469
Reference	2004-06-21	2004	3	Hemiptera nymph	1	4.78469
Reference	2004-06-21	2004	3	Aphidoidea	4	19.1388
Reference	2004-06-21	2004	4	Araneae	3	14.3541
Reference	2004-06-21	2004	4	Chironomidae	5	23.9234
Reference	2004-06-21	2004	4	Psychodidae	3	14.3541
Reference	2004-06-21	2004	4	Thysanoptera larva	4	19.1388
Reference	2004-06-21	2004	4	Acari	16	76.555
Reference	2004-06-21	2004	4	Entomobryomorpha/Poduromorpha	14	66.9856
Reference	2004-06-21	2004	4	Coleoptera larva	1	4.78469
Reference	2004-06-21	2004	4	Acari	1	4.78469
Reference	2004-06-21	2004	4	Cicadellidae	1	4.78469
Reference	2004-06-21	2004	4	Cicadellidae nymph	1	4.78469
Reference	2004-06-21	2004	4	Psocoptera	1	4.78469
Reference	2004-06-21	2004	4	Hemiptera	1	4.78469
Reference	2004-06-21	2004	4	Cecidomyiidae	3	14.3541
Reference	2004-06-21	2004	4	Tipulidae	2	9.56938
Reference	2004-06-21	2004	4	Phoridae	2	9.56938
Reference	2004-06-21	2004	4	Sciaridae	1	4.78469
Reference	2004-06-21	2004	4	Chloropidae	15	71.7703
Reference	2004-06-21	2004	5	Araneae	4	19.1388
Reference	2004-06-21	2004	5	Hymenoptera	2	9.56938
Reference	2004-06-21	2004	5	Phoridae	5	23.9234
Reference	2004-06-21	2004	5	Chironomidae	10	47.8469
Reference	2004-06-21	2004	5	Sciaridae	3	14.3541
Reference	2004-06-21	2004	5	Thysanoptera larva	3	14.3541
Reference	2004-06-21	2004	5	Psychodidae	3	14.3541
Reference	2004-06-21	2004	5	Thysanoptera	3	14.3541
Reference	2004-06-21	2004	5	Cecidomyiidae	9	43.0622
Reference	2004-06-21	2004	5	Psocoptera nymph	1	4.78469
Reference	2004-06-21	2004	5	Acari	29	138.756
Reference	2004-06-21	2004	5	Entomobryomorpha/Poduromorpha	62	296.651
Reference	2004-06-21	2004	5	Aphidoidea	2	9.56938
Reference	2004-06-21	2004	5	Coleoptera	1	4.78469
Reference	2004-06-21	2004	5	Aphidoidea	2	9.56938
Reference	2004-06-21	2004	5	Cicadellidae nymph	2	9.56938
Reference	2004-06-21	2004	5	Cicadellidae	1	4.78469
Reference	2004-06-21	2004	5	Hemiptera	2	9.56938
Reference	2004-06-21	2004	5	Tipulidae	1	4.78469
Reference	2004-06-21	2004	5	Chloropidae	4	19.1388
Reference	2004-06-21	2004	5	Anthomyiidae	1	4.78469
Reference	2004-06-21	2004	6	Coleoptera	2	9.56938
Reference	2004-06-21	2004	6	Araneae	8	38.2775
Reference	2004-06-21	2004	6	Hymenoptera	2	9.56938
Reference	2004-06-21	2004	6	Chironomidae	5	23.9234
Reference	2004-06-21	2004	6	Acari	22	105.263
Reference	2004-06-21	2004	6	Entomobryomorpha/Poduromorpha	78	373.206
Reference	2004-06-21	2004	6	Sminthuridae	7	33.4928
Reference	2004-06-21	2004	6	Hemiptera nymph	2	9.56938
Reference	2004-06-21	2004	6	Hemiptera nymph	1	4.78469
Reference	2004-06-21	2004	6	Thysanoptera larva	10	47.8469
Reference	2004-06-21	2004	6	Thysanoptera	2	9.56938
Reference	2004-06-21	2004	6	Cicadellidae	3	14.3541
Reference	2004-06-21	2004	6	Psocoptera nymph	1	4.78469
Reference	2004-06-21	2004	6	Psocoptera	1	4.78469
Reference	2004-06-21	2004	6	Cecidomyiidae	7	33.4928
Reference	2004-06-21	2004	6	Phoridae	1	4.78469
Reference	2004-06-21	2004	6	Sciaridae	2	9.56938
Reference	2004-06-21	2004	6	Tipulidae	1	4.78469
Reference	2004-06-21	2004	6	Chloropidae	4	19.1388
Reference	2004-06-21	2004	6	Dolichopodidae	1	4.78469
Reference	2004-06-21	2004	6	Rhagionidae	2	9.56938
Reference	2004-06-21	2004	6	Sphaeroceridae	1	4.78469
Reference	2004-06-21	2004	7	Phoridae	5	23.9234
Reference	2004-06-21	2004	7	Coleoptera	3	14.3541
Reference	2004-06-21	2004	7	Hymenoptera	3	14.3541
Reference	2004-06-21	2004	7	Psychodidae	4	19.1388
Reference	2004-06-21	2004	7	Sciaridae	4	19.1388
Reference	2004-06-21	2004	7	Araneae	3	14.3541
Reference	2004-06-21	2004	7	Coleoptera larva	1	4.78469
Reference	2004-06-21	2004	7	Acari	7	33.4928
Reference	2004-06-21	2004	7	Entomobryomorpha/Poduromorpha	122	583.732
Reference	2004-06-21	2004	7	Sminthuridae	3	14.3541
Reference	2004-06-21	2004	7	Hemiptera nymph	2	9.56938
Reference	2004-06-21	2004	7	Thysanoptera larva	4	19.1388
Reference	2004-06-21	2004	7	Cicadellidae nymph	1	4.78469
Reference	2004-06-21	2004	7	Psocoptera	1	4.78469
Reference	2004-06-21	2004	7	Thysanoptera	1	4.78469
Reference	2004-06-21	2004	7	Psocoptera nymph	1	4.78469
Reference	2004-06-21	2004	7	Cecidomyiidae	10	47.8469
Reference	2004-06-21	2004	7	Chironomidae	1	4.78469
Reference	2004-06-21	2004	7	Dolichopodidae	1	4.78469
Reference	2004-06-21	2004	7	Mycetophilidae	2	9.56938
Reference	2004-06-21	2004	7	Chloropidae	3	14.3541
Restored	2004-06-21	2004	1	Chironomidae	3	14.3541
Restored	2004-06-21	2004	1	Acari	2	9.56938
Restored	2004-06-21	2004	1	Lepidoptera	1	4.78469
Restored	2004-06-21	2004	1	Sarcophagidae	1	4.78469
Restored	2004-06-21	2004	1	Thysanoptera	2	9.56938
Restored	2004-06-21	2004	1	Ceratopogonidae	1	4.78469
Restored	2004-06-21	2004	1	Cecidomyiidae	1	4.78469
Restored	2004-06-21	2004	2	Araneae	1	4.78469
Restored	2004-06-21	2004	2	Psychodidae	2	9.56938
Restored	2004-06-21	2004	2	Entomobryomorpha/Poduromorpha	2	9.56938
Restored	2004-06-21	2004	2	Acari	2	9.56938
Restored	2004-06-21	2004	2	Coleoptera	1	4.78469
Restored	2004-06-21	2004	2	Clusiidae	1	4.78469
Restored	2004-06-21	2004	2	Muscomorpha	2	9.56938
Restored	2004-06-21	2004	2	Phoridae	1	4.78469
Restored	2004-06-21	2004	2	Chironomidae	1	4.78469
Restored	2004-06-21	2004	2	Aphidoidea	1	4.78469
Restored	2004-06-21	2004	2	Hemiptera nymph	1	4.78469
Restored	2004-06-21	2004	2	Dolichopodidae	2	9.56938
Restored	2004-06-21	2004	3	Acari	2	9.56938
Restored	2004-06-21	2004	3	Entomobryomorpha/Poduromorpha	2	9.56938
Restored	2004-06-21	2004	3	Neuroptera	1	4.78469
Restored	2004-06-21	2004	3	Rhagionidae	1	4.78469
Restored	2004-06-21	2004	3	Thysanoptera	1	4.78469
Restored	2004-06-21	2004	3	Cecidomyiidae	1	4.78469
Restored	2004-06-21	2004	3	Chironomidae	1	4.78469
Restored	2004-06-21	2004	3	Psocoptera nymph	1	4.78469
Restored	2004-06-21	2004	4	Lepidoptera	1	4.78469
Restored	2004-06-21	2004	4	Entomobryomorpha/Poduromorpha	2	9.56938
Restored	2004-06-21	2004	4	Psocoptera nymph	1	4.78469
Restored	2004-06-21	2004	4	Acari	1	4.78469
Restored	2004-06-21	2004	4	Aphidoidea	1	4.78469
Restored	2004-06-21	2004	4	Cicadellidae	1	4.78469
Restored	2004-06-21	2004	4	Phoridae	1	4.78469
Restored	2004-06-21	2004	4	Psychodidae	3	14.3541
Restored	2004-06-21	2004	4	Sciaridae	1	4.78469
Restored	2004-06-21	2004	4	Ceratopogonidae	1	4.78469
Restored	2004-06-21	2004	4	Muscomorpha	1	4.78469
Restored	2004-06-21	2004	5	Thysanoptera	3	14.3541
Restored	2004-06-21	2004	5	Psocoptera nymph	2	9.56938
Restored	2004-06-21	2004	5	Chloropidae	1	4.78469
Restored	2004-06-21	2004	5	Chironomidae	1	4.78469
Restored	2004-06-21	2004	5	Ceratopogonidae	1	4.78469
Restored	2004-06-21	2004	6	Lepidoptera	1	4.78469
Restored	2004-06-21	2004	6	Thysanoptera	1	4.78469
Restored	2004-06-21	2004	6	Entomobryomorpha/Poduromorpha	1	4.78469
Restored	2004-06-21	2004	6	Acari	5	23.9234
Restored	2004-06-21	2004	7	Psychodidae	1	4.78469
Restored	2004-06-21	2004	7	Sciaridae	1	4.78469
Restored	2004-06-21	2004	7	Coleoptera	1	4.78469
Restored	2004-06-21	2004	7	Hymenoptera	1	4.78469
Restored	2004-06-21	2004	7	Thysanoptera	1	4.78469
Restored	2004-06-21	2004	7	Chironomidae	2	9.56938
Restored	2004-06-21	2004	7	Acari	4	19.1388
Restored	2004-06-21	2004	7	Phoridae	1	4.78469
Reference	2004-07-07	2004	1	Chironomidae	5	23.9234
Reference	2004-07-07	2004	1	Microcoryphia	1	4.78469
Reference	2004-07-07	2004	1	Araneae	3	14.3541
Reference	2004-07-07	2004	1	Psocoptera nymph	8	38.2775
Reference	2004-07-07	2004	1	Phoridae	1	4.78469
Reference	2004-07-07	2004	1	Coleoptera	1	4.78469
Reference	2004-07-07	2004	1	Acari	8	38.2775
Reference	2004-07-07	2004	1	Entomobryomorpha/Poduromorpha	43	205.742
Reference	2004-07-07	2004	1	Hemiptera nymph	1	4.78469
Reference	2004-07-07	2004	1	Hemiptera nymph	1	4.78469
Reference	2004-07-07	2004	1	Psocoptera	1	4.78469
Reference	2004-07-07	2004	1	Aphidoidea	1	4.78469
Reference	2004-07-07	2004	1	Cecidomyiidae	26	124.402
Reference	2004-07-07	2004	1	Sciaridae	2	9.56938
Reference	2004-07-07	2004	1	Mycetophilidae	1	4.78469
Reference	2004-07-07	2004	1	Chloropidae	1	4.78469
Reference	2004-07-07	2004	1	anisopodidae	1	4.78469
Reference	2004-07-07	2004	1	Dixidae	1	4.78469
Reference	2004-07-07	2004	2	Hymenoptera	1	4.78469
Reference	2004-07-07	2004	2	Chironomidae	2	9.56938
Reference	2004-07-07	2004	2	Orthoptera	1	4.78469
Reference	2004-07-07	2004	2	Coleoptera	3	14.3541
Reference	2004-07-07	2004	2	Araneae	2	9.56938
Reference	2004-07-07	2004	2	Cecidomyiidae	32	153.11
Reference	2004-07-07	2004	2	Entomobryomorpha/Poduromorpha	51	244.019
Reference	2004-07-07	2004	2	Acari	2	9.56938
Reference	2004-07-07	2004	2	Hemiptera nymph	2	9.56938
Reference	2004-07-07	2004	2	Aphidoidea	2	9.56938
Reference	2004-07-07	2004	2	Hemiptera nymph	1	4.78469
Reference	2004-07-07	2004	2	Psocoptera	1	4.78469
Reference	2004-07-07	2004	2	Cicadellidae nymph	1	4.78469
Reference	2004-07-07	2004	2	Tipulidae	3	14.3541
Reference	2004-07-07	2004	2	Psychodidae	1	4.78469
Reference	2004-07-07	2004	2	Mycetophilidae	1	4.78469
Reference	2004-07-07	2004	2	Sciaridae	1	4.78469
Reference	2004-07-07	2004	2	Tachinidae	1	4.78469
Reference	2004-07-07	2004	3	Chironomidae	4	19.1388
Reference	2004-07-07	2004	3	Coleoptera	2	9.56938
Reference	2004-07-07	2004	3	Araneae	3	14.3541
Reference	2004-07-07	2004	3	Phoridae	3	14.3541
Reference	2004-07-07	2004	3	Hymenoptera	1	4.78469
Reference	2004-07-07	2004	3	Scatopsidae	2	9.56938
Reference	2004-07-07	2004	3	Tipulidae	1	4.78469
Reference	2004-07-07	2004	3	Thysanoptera larva	2	9.56938
Reference	2004-07-07	2004	3	Psocoptera nymph	3	14.3541
Reference	2004-07-07	2004	3	Thysanoptera	2	9.56938
Reference	2004-07-07	2004	3	Acari	5	23.9234
Reference	2004-07-07	2004	3	Entomobryomorpha/Poduromorpha	37	177.033
Reference	2004-07-07	2004	3	Hemiptera nymph	6	28.7081
Reference	2004-07-07	2004	3	Cecidomyiidae	18	86.1244
Reference	2004-07-07	2004	3	Psocoptera	1	4.78469
Reference	2004-07-07	2004	3	Coleoptera larva	4	19.1388
Reference	2004-07-07	2004	3	Tethinidae	1	4.78469
Reference	2004-07-07	2004	3	Psychodidae	3	14.3541
Reference	2004-07-07	2004	4	Araneae	3	14.3541
Reference	2004-07-07	2004	4	Coleoptera	5	23.9234
Reference	2004-07-07	2004	4	Lepidoptera	1	4.78469
Reference	2004-07-07	2004	4	Scatopsidae	1	4.78469
Reference	2004-07-07	2004	4	Psocoptera nymph	4	19.1388
Reference	2004-07-07	2004	4	Thysanoptera	3	14.3541
Reference	2004-07-07	2004	4	Acari	1	4.78469
Reference	2004-07-07	2004	4	Entomobryomorpha/Poduromorpha	60	287.081
Reference	2004-07-07	2004	4	Hemiptera nymph	11	52.6316
Reference	2004-07-07	2004	4	Cecidomyiidae	28	133.971
Reference	2004-07-07	2004	4	Hymenoptera	1	4.78469
Reference	2004-07-07	2004	4	Psocoptera	1	4.78469
Reference	2004-07-07	2004	4	Cicadellidae	3	14.3541
Reference	2004-07-07	2004	4	Hemiptera	5	23.9234
Reference	2004-07-07	2004	4	Psychodidae	2	9.56938
Reference	2004-07-07	2004	4	Sciaridae	4	19.1388
Reference	2004-07-07	2004	4	Tipulidae	1	4.78469
Reference	2004-07-07	2004	5	Hymenoptera	2	9.56938
Reference	2004-07-07	2004	5	Psychodidae	5	23.9234
Reference	2004-07-07	2004	5	Psocoptera nymph	4	19.1388
Reference	2004-07-07	2004	5	Thysanoptera	2	9.56938
Reference	2004-07-07	2004	5	Sciaridae	3	14.3541
Reference	2004-07-07	2004	5	Lepidoptera	1	4.78469
Reference	2004-07-07	2004	5	Thysanoptera larva	2	9.56938
Reference	2004-07-07	2004	5	Acari	2	9.56938
Reference	2004-07-07	2004	5	Entomobryomorpha/Poduromorpha	40	191.388
Reference	2004-07-07	2004	5	Hemiptera nymph	4	19.1388
Reference	2004-07-07	2004	5	Cecidomyiidae	41	196.172
Reference	2004-07-07	2004	5	Hemiptera nymph	1	4.78469
Reference	2004-07-07	2004	5	Tipulidae	1	4.78469
Reference	2004-07-07	2004	5	Dixidae	1	4.78469
Reference	2004-07-07	2004	5	Chironomidae	2	9.56938
Reference	2004-07-07	2004	5	Ceratopogonidae	1	4.78469
Reference	2004-07-07	2004	5	Heleomyzidae	1	4.78469
Reference	2004-07-07	2004	5	Tachinidae	1	4.78469
Reference	2004-07-07	2004	6	Formicidae	1	4.78469
Reference	2004-07-07	2004	6	Hymenoptera	15	71.7703
Reference	2004-07-07	2004	6	Psocoptera nymph	9	43.0622
Reference	2004-07-07	2004	6	Araneae	1	4.78469
Reference	2004-07-07	2004	6	Porcellio scaber	1	4.78469
Reference	2004-07-07	2004	6	Coleoptera	1	4.78469
Reference	2004-07-07	2004	6	Thysanoptera	1	4.78469
Reference	2004-07-07	2004	6	Thysanoptera larva	1	4.78469
Reference	2004-07-07	2004	6	Acari	6	28.7081
Reference	2004-07-07	2004	6	Entomobryomorpha/Poduromorpha	112	535.885
Reference	2004-07-07	2004	6	Sminthuridae	1	4.78469
Reference	2004-07-07	2004	6	Hemiptera nymph	15	71.7703
Reference	2004-07-07	2004	6	Cecidomyiidae	8	38.2775
Reference	2004-07-07	2004	6	Diptera larva	7	33.4928
Reference	2004-07-07	2004	6	Sciaridae	5	23.9234
Reference	2004-07-07	2004	6	Chironomidae	2	9.56938
Reference	2004-07-07	2004	6	Tipulidae	1	4.78469
Reference	2004-07-07	2004	6	Lauxaniidae	2	9.56938
Reference	2004-07-07	2004	6	Psyllidae	1	4.78469
Reference	2004-07-07	2004	6	Psocoptera	1	4.78469
Reference	2004-07-07	2004	7	Araneae	1	4.78469
Reference	2004-07-07	2004	7	Hymenoptera	12	57.4163
Reference	2004-07-07	2004	7	Littorophiloscia richardsonae	1	4.78469
Reference	2004-07-07	2004	7	Sciaridae	2	9.56938
Reference	2004-07-07	2004	7	Tipulidae	1	4.78469
Reference	2004-07-07	2004	7	Coleoptera larva	1	4.78469
Reference	2004-07-07	2004	7	Thysanoptera	4	19.1388
Reference	2004-07-07	2004	7	Formicidae	1	4.78469
Reference	2004-07-07	2004	7	Chironomidae	1	4.78469
Reference	2004-07-07	2004	7	Thysanoptera larva	1	4.78469
Reference	2004-07-07	2004	7	Acari	4	19.1388
Reference	2004-07-07	2004	7	Entomobryomorpha/Poduromorpha	91	435.407
Reference	2004-07-07	2004	7	Hemiptera nymph	8	38.2775
Reference	2004-07-07	2004	7	Aphidoidea	2	9.56938
Reference	2004-07-07	2004	7	Cecidomyiidae	4	19.1388
Reference	2004-07-07	2004	7	Psocoptera	1	4.78469
Reference	2004-07-07	2004	7	Cicadellidae	1	4.78469
Reference	2004-07-07	2004	7	Phoridae	1	4.78469
Reference	2004-07-07	2004	7	Muscomorpha	1	4.78469
Restored	2004-07-07	2004	1	Mycetophilidae	2	9.56938
Restored	2004-07-07	2004	1	Sphaeroceridae	1	4.78469
Restored	2004-07-07	2004	1	Aphidoidea	1	4.78469
Restored	2004-07-07	2004	1	Araneae	1	4.78469
Restored	2004-07-07	2004	1	Entomobryomorpha/Poduromorpha	1	4.78469
Restored	2004-07-07	2004	1	Muscomorpha	2	9.56938
Restored	2004-07-07	2004	1	Acari	1	4.78469
Restored	2004-07-07	2004	2	Entomobryomorpha/Poduromorpha	1	4.78469
Restored	2004-07-07	2004	2	Thysanoptera	2	9.56938
Restored	2004-07-07	2004	2	Psocoptera nymph	2	9.56938
Restored	2004-07-07	2004	2	Chironomidae	3	14.3541
Restored	2004-07-07	2004	2	Sciaridae	2	9.56938
Restored	2004-07-07	2004	2	Lauxaniidae	1	4.78469
Restored	2004-07-07	2004	2	Muscomorpha	1	4.78469
Restored	2004-07-07	2004	3	Lepidoptera	1	4.78469
Restored	2004-07-07	2004	3	Hemiptera	1	4.78469
Restored	2004-07-07	2004	3	Entomobryomorpha/Poduromorpha	1	4.78469
Restored	2004-07-07	2004	3	Sciaridae	1	4.78469
Restored	2004-07-07	2004	3	Psocoptera	1	4.78469
Restored	2004-07-07	2004	3	Phoridae	1	4.78469
Restored	2004-07-07	2004	3	Cecidomyiidae	3	14.3541
Restored	2004-07-07	2004	3	Chironomidae	1	4.78469
Restored	2004-07-07	2004	3	Thysanoptera	1	4.78469
Restored	2004-07-07	2004	4	Lepidoptera	1	4.78469
Restored	2004-07-07	2004	4	Thysanoptera	2	9.56938
Restored	2004-07-07	2004	4	Psychodidae	1	4.78469
Restored	2004-07-07	2004	4	Cecidomyiidae	2	9.56938
Restored	2004-07-07	2004	4	Dolichopodidae	1	4.78469
Restored	2004-07-07	2004	5	Hemiptera nymph	1	4.78469
Restored	2004-07-07	2004	5	Thysanoptera	1	4.78469
Restored	2004-07-07	2004	5	Psocoptera nymph	1	4.78469
Restored	2004-07-07	2004	5	Hemiptera nymph	1	4.78469
Restored	2004-07-07	2004	5	Neuroptera	1	4.78469
Restored	2004-07-07	2004	6	Araneae	1	4.78469
Restored	2004-07-07	2004	6	Hemiptera nymph	1	4.78469
Restored	2004-07-07	2004	6	Thysanoptera	1	4.78469
Restored	2004-07-07	2004	6	Sciaridae	1	4.78469
Restored	2004-07-07	2004	6	Odonata	1	4.78469
Restored	2004-07-07	2004	6	Chironomidae	1	4.78469
Restored	2004-07-07	2004	6	Cecidomyiidae	1	4.78469
Restored	2004-07-07	2004	7	Psychodidae	2	9.56938
Restored	2004-07-07	2004	7	Araneae	1	4.78469
Restored	2004-07-07	2004	7	Psocoptera nymph	1	4.78469
Restored	2004-07-07	2004	7	Coleoptera larva	1	4.78469
Restored	2004-07-07	2004	7	Phoridae	1	4.78469
Restored	2004-07-07	2004	7	Chironomidae	1	4.78469
Reference	2010-04-19	2010	1	Chironomidae larva	1	4.78469
Reference	2010-04-19	2010	1	Cecidomyiidae larva	4	19.1388
Reference	2010-04-19	2010	1	Acari	5	23.9234
Reference	2010-04-19	2010	1	Sciaridae	6	28.7081
Reference	2010-04-19	2010	1	Chironomidae	4	19.1388
Reference	2010-04-19	2010	1	Entomobryomorpha/Poduromorpha	23	110.048
Reference	2010-04-19	2010	1	Entomobryomorpha/Poduromorpha	3	14.3541
Reference	2010-04-19	2010	1	Sminthuridae	1	4.78469
Reference	2010-04-19	2010	1	Entomobryomorpha/Poduromorpha	2	9.56938
Reference	2010-04-19	2010	1	Psocoptera nymph	3	14.3541
Reference	2010-04-19	2010	1	Aphidoidea	6	28.7081
Reference	2010-04-19	2010	1	Thysanoptera larva	5	23.9234
Reference	2010-04-19	2010	1	Thysanoptera larva	1	4.78469
Reference	2010-04-19	2010	1	Hemiptera nymph	4	19.1388
Reference	2010-04-19	2010	1	Coleoptera	2	9.56938
Reference	2010-04-19	2010	1	Tenthredinoidea	10	47.8469
Reference	2010-04-19	2010	1	Porcellio scaber	2	9.56938
Reference	2010-04-19	2010	1	Lauxaniidae	1	4.78469
Reference	2010-04-19	2010	2	Tenthredinoidea	6	28.7081
Reference	2010-04-19	2010	2	Cecidomyiidae larva	2	9.56938
Reference	2010-04-19	2010	2	Acari	3	14.3541
Reference	2010-04-19	2010	2	Sciaridae	6	28.7081
Reference	2010-04-19	2010	2	Chironomidae	2	9.56938
Reference	2010-04-19	2010	2	Ichneumonidae	4	19.1388
Reference	2010-04-19	2010	2	Hymenoptera	1	4.78469
Reference	2010-04-19	2010	2	Aphidoidea	4	19.1388
Reference	2010-04-19	2010	2	Hemiptera nymph	5	23.9234
Reference	2010-04-19	2010	2	Psocoptera	2	9.56938
Reference	2010-04-19	2010	2	Psocoptera nymph	4	19.1388
Reference	2010-04-19	2010	2	Hemiptera	1	4.78469
Reference	2010-04-19	2010	2	Entomobryomorpha/Poduromorpha	8	38.2775
Reference	2010-04-19	2010	2	Entomobryomorpha/Poduromorpha	1	4.78469
Reference	2010-04-19	2010	2	Thysanoptera larva	1	4.78469
Reference	2010-04-19	2010	2	Entomobryomorpha/Poduromorpha	1	4.78469
Reference	2010-04-19	2010	2	Lepidoptera larva	1	4.78469
Reference	2010-04-19	2010	2	Littorophiloscia richardsonae	1	4.78469
Reference	2010-04-19	2010	3	Coleoptera	1	4.78469
Reference	2010-04-19	2010	3	Hemiptera	1	4.78469
Reference	2010-04-19	2010	3	Thysanoptera	1	4.78469
Reference	2010-04-19	2010	3	Ichneumonidae	1	4.78469
Reference	2010-04-19	2010	3	Hymenoptera	4	19.1388
Reference	2010-04-19	2010	3	Phoridae	1	4.78469
Reference	2010-04-19	2010	3	Tenthredinoidea	5	23.9234
Reference	2010-04-19	2010	3	Hemiptera nymph	1	4.78469
Reference	2010-04-19	2010	3	Lepidoptera larva	1	4.78469
Reference	2010-04-19	2010	3	Ceratopogonidae	1	4.78469
Reference	2010-04-19	2010	3	Entomobryomorpha/Poduromorpha	1	4.78469
Reference	2010-04-19	2010	3	Thysanoptera	8	38.2775
Reference	2010-04-19	2010	3	Thysanoptera	1	4.78469
Reference	2010-04-19	2010	3	Aphidoidea	3	14.3541
Reference	2010-04-19	2010	3	Psocoptera	3	14.3541
Reference	2010-04-19	2010	3	Chironomidae larva	1	4.78469
Reference	2010-04-19	2010	3	Hymenoptera	1	4.78469
Reference	2010-04-19	2010	3	Chironomidae	1	4.78469
Reference	2010-04-19	2010	3	Acari	6	28.7081
Reference	2010-04-19	2010	3	Entomobryomorpha/Poduromorpha	29	138.756
Reference	2010-04-19	2010	3	Entomobryomorpha/Poduromorpha	9	43.0622
Reference	2010-04-19	2010	3	Sciaridae	9	43.0622
Reference	2010-04-19	2010	3	Cecidomyiidae larva	7	33.4928
Reference	2010-04-19	2010	3	Hymenoptera	1	4.78469
Reference	2010-04-19	2010	4	Hemiptera	1	4.78469
Reference	2010-04-19	2010	4	Tenthredinoidea	3	14.3541
Reference	2010-04-19	2010	4	Hymenoptera	1	4.78469
Reference	2010-04-19	2010	4	Aphidoidea	7	33.4928
Reference	2010-04-19	2010	4	Cicadellidae nymph	3	14.3541
Reference	2010-04-19	2010	4	Psocoptera nymph	3	14.3541
Reference	2010-04-19	2010	4	Hymenoptera	1	4.78469
Reference	2010-04-19	2010	4	Hemiptera nymph	1	4.78469
Reference	2010-04-19	2010	4	Thysanoptera	5	23.9234
Reference	2010-04-19	2010	4	Coleoptera	1	4.78469
Reference	2010-04-19	2010	4	Cecidomyiidae larva	4	19.1388
Reference	2010-04-19	2010	4	Acari	3	14.3541
Reference	2010-04-19	2010	4	Entomobryomorpha/Poduromorpha	4	19.1388
Reference	2010-04-19	2010	4	Sciaridae	1	4.78469
Reference	2010-04-19	2010	4	Entomobryomorpha/Poduromorpha	2	9.56938
Reference	2010-04-19	2010	5	Opiliones	1	4.78469
Reference	2010-04-19	2010	5	Tenthredinoidea	1	4.78469
Reference	2010-04-19	2010	5	Phoridae	1	4.78469
Reference	2010-04-19	2010	5	Coleoptera	1	4.78469
Reference	2010-04-19	2010	5	Chironomidae	4	19.1388
Reference	2010-04-19	2010	5	Entomobryomorpha/Poduromorpha	1	4.78469
Reference	2010-04-19	2010	5	Psocoptera nymph	3	14.3541
Reference	2010-04-19	2010	5	Psocoptera	1	4.78469
Reference	2010-04-19	2010	5	Hemiptera	2	9.56938
Reference	2010-04-19	2010	5	Hymenoptera	3	14.3541
Reference	2010-04-19	2010	5	Aphidoidea	3	14.3541
Reference	2010-04-19	2010	5	Cicadellidae nymph	1	4.78469
Reference	2010-04-19	2010	5	Thysanoptera larva	9	43.0622
Reference	2010-04-19	2010	5	Thysanoptera	1	4.78469
Reference	2010-04-19	2010	5	Thysanoptera larva	2	9.56938
Reference	2010-04-19	2010	5	Thysanoptera	1	4.78469
Reference	2010-04-19	2010	5	Acari	6	28.7081
Reference	2010-04-19	2010	5	Entomobryomorpha/Poduromorpha	5	23.9234
Reference	2010-04-19	2010	5	Entomobryomorpha/Poduromorpha	1	4.78469
Reference	2010-04-19	2010	5	Sciaridae	1	4.78469
Reference	2010-04-19	2010	5	Cecidomyiidae larva	5	23.9234
Reference	2010-04-19	2010	5	Diptera larva	1	4.78469
Reference	2010-04-19	2010	5	Coleoptera larva	1	4.78469
Reference	2010-04-19	2010	5	Hymenoptera	1	4.78469
Reference	2010-04-19	2010	5	Muscomorpha	1	4.78469
Reference	2010-04-19	2010	6	Lepidoptera larva	3	14.3541
Reference	2010-04-19	2010	6	Tipulidae	1	4.78469
Reference	2010-04-19	2010	6	Coleoptera	1	4.78469
Reference	2010-04-19	2010	6	Ichneumonidae	1	4.78469
Reference	2010-04-19	2010	6	Coleoptera	1	4.78469
Reference	2010-04-19	2010	6	Phoridae	2	9.56938
Reference	2010-04-19	2010	6	Aphidoidea	2	9.56938
Reference	2010-04-19	2010	6	Tenthredinoidea	1	4.78469
Reference	2010-04-19	2010	6	Psocoptera	1	4.78469
Reference	2010-04-19	2010	6	Hemiptera	1	4.78469
Reference	2010-04-19	2010	6	Thysanoptera larva	1	4.78469
Reference	2010-04-19	2010	6	Psocoptera nymph	3	14.3541
Reference	2010-04-19	2010	6	Thysanoptera	1	4.78469
Reference	2010-04-19	2010	6	Cicadellidae nymph	2	9.56938
Reference	2010-04-19	2010	6	Coleoptera larva	1	4.78469
Reference	2010-04-19	2010	6	Hymenoptera	1	4.78469
Reference	2010-04-19	2010	6	Hymenoptera	1	4.78469
Reference	2010-04-19	2010	6	Ceratopogonidae	2	9.56938
Reference	2010-04-19	2010	6	Hymenoptera	1	4.78469
Reference	2010-04-19	2010	6	Porcellio scaber	7	33.4928
Reference	2010-04-19	2010	6	Littorophiloscia richardsonae	1	4.78469
Reference	2010-04-19	2010	6	Chironomidae	1	4.78469
Reference	2010-04-19	2010	6	Acari	14	66.9856
Reference	2010-04-19	2010	6	Entomobryomorpha/Poduromorpha	45	215.311
Reference	2010-04-19	2010	6	Entomobryomorpha/Poduromorpha	11	52.6316
Reference	2010-04-19	2010	6	Sciaridae	2	9.56938
Reference	2010-04-19	2010	6	Thysanoptera larva	14	66.9856
Reference	2010-04-19	2010	7	Lepidoptera larva	2	9.56938
Reference	2010-04-19	2010	7	Araneae	2	9.56938
Reference	2010-04-19	2010	7	Tenthredinoidea	2	9.56938
Reference	2010-04-19	2010	7	Aphidoidea	1	4.78469
Reference	2010-04-19	2010	7	Ichneumonidae	1	4.78469
Reference	2010-04-19	2010	7	Tipulidae	1	4.78469
Reference	2010-04-19	2010	7	Cecidomyiidae larva	5	23.9234
Reference	2010-04-19	2010	7	Aphidoidea	8	38.2775
Reference	2010-04-19	2010	7	Sciaridae	5	23.9234
Reference	2010-04-19	2010	7	Thysanoptera larva	5	23.9234
Reference	2010-04-19	2010	7	Thysanoptera	1	4.78469
Reference	2010-04-19	2010	7	Thysanoptera larva	1	4.78469
Reference	2010-04-19	2010	7	Hemiptera	1	4.78469
Reference	2010-04-19	2010	7	Entomobryomorpha/Poduromorpha	4	19.1388
Reference	2010-04-19	2010	7	Entomobryomorpha/Poduromorpha	6	28.7081
Reference	2010-04-19	2010	7	Psocoptera nymph	5	23.9234
Reference	2010-04-19	2010	7	Cicadellidae nymph	2	9.56938
Reference	2010-04-19	2010	7	Cicadellidae	1	4.78469
Reference	2010-04-19	2010	7	Coleoptera larva	1	4.78469
Reference	2010-04-19	2010	7	Hymenoptera	1	4.78469
Reference	2010-04-19	2010	7	Diptera larva	1	4.78469
Reference	2010-04-19	2010	7	Entomobryomorpha/Poduromorpha	1	4.78469
Reference	2010-04-19	2010	7	Chironomidae	2	9.56938
Reference	2010-04-19	2010	7	Acari	8	38.2775
Reference	2010-04-19	2010	7	Hymenoptera	1	4.78469
Reference	2010-04-19	2010	7	Insecta larva	1	4.78469
Reference	2010-04-19	2010	7	Coleoptera	1	4.78469
Restored	2010-04-19	2010	1	Tipulidae	1	4.78469
Restored	2010-04-19	2010	1	Psychodidae	1	4.78469
Restored	2010-04-19	2010	1	Sciaridae	10	47.8469
Restored	2010-04-19	2010	1	Entomobryomorpha/Poduromorpha	1	4.78469
Restored	2010-04-19	2010	1	Ceratopogonidae	1	4.78469
Restored	2010-04-19	2010	1	Thysanoptera larva	2	9.56938
Restored	2010-04-19	2010	1	Phoridae	3	14.3541
Restored	2010-04-19	2010	1	Thysanoptera	1	4.78469
Restored	2010-04-19	2010	1	Hymenoptera	2	9.56938
Restored	2010-04-19	2010	1	Psocoptera	2	9.56938
Restored	2010-04-19	2010	1	Psyllidae	2	9.56938
Restored	2010-04-19	2010	1	Chironomidae	4	19.1388
Restored	2010-04-19	2010	1	Cicadellidae	1	4.78469
Restored	2010-04-19	2010	1	Psocoptera	1	4.78469
Restored	2010-04-19	2010	1	Thysanoptera	1	4.78469
Restored	2010-04-19	2010	1	Cicadellidae nymph	1	4.78469
Restored	2010-04-19	2010	1	Hemiptera	1	4.78469
Restored	2010-04-19	2010	1	Tenthredinoidea	1	4.78469
Restored	2010-04-19	2010	1	Coleoptera	1	4.78469
Restored	2010-04-19	2010	1	Coleoptera	1	4.78469
Restored	2010-04-19	2010	1	Cecidomyiidae	4	19.1388
Restored	2010-04-19	2010	1	Sminthuridae	2	9.56938
Restored	2010-04-19	2010	1	Acari	10	47.8469
Restored	2010-04-19	2010	1	Aphidoidea	9	43.0622
Restored	2010-04-19	2010	1	Entomobryomorpha/Poduromorpha	3	14.3541
Restored	2010-04-19	2010	1	Entomobryomorpha/Poduromorpha	2	9.56938
Restored	2010-04-19	2010	1	Empididae	1	4.78469
Restored	2010-04-19	2010	1	Hemiptera nymph	2	9.56938
Restored	2010-04-19	2010	2	Sciaridae	28	133.971
Restored	2010-04-19	2010	2	Chironomidae	5	23.9234
Restored	2010-04-19	2010	2	Cecidomyiidae larva	2	9.56938
Restored	2010-04-19	2010	2	Hemiptera	1	4.78469
Restored	2010-04-19	2010	2	Thysanoptera larva	1	4.78469
Restored	2010-04-19	2010	2	Psocoptera	3	14.3541
Restored	2010-04-19	2010	2	Hymenoptera	1	4.78469
Restored	2010-04-19	2010	2	Phoridae	1	4.78469
Restored	2010-04-19	2010	2	Tipulidae	1	4.78469
Restored	2010-04-19	2010	2	Coleoptera larva	1	4.78469
Restored	2010-04-19	2010	2	Tenthredinoidea	1	4.78469
Restored	2010-04-19	2010	2	Coleoptera	1	4.78469
Restored	2010-04-19	2010	2	Hymenoptera	1	4.78469
Restored	2010-04-19	2010	2	Coleoptera	1	4.78469
Restored	2010-04-19	2010	2	Hymenoptera	1	4.78469
Restored	2010-04-19	2010	2	Coleoptera	1	4.78469
Restored	2010-04-19	2010	2	Coleoptera	1	4.78469
Restored	2010-04-19	2010	2	Cecidomyiidae	7	33.4928
Restored	2010-04-19	2010	2	Acari	2	9.56938
Restored	2010-04-19	2010	2	Aphidoidea	9	43.0622
Restored	2010-04-19	2010	2	Entomobryomorpha/Poduromorpha	4	19.1388
Restored	2010-04-19	2010	2	Entomobryomorpha/Poduromorpha	4	19.1388
Restored	2010-04-19	2010	3	Sciaridae	9	43.0622
Restored	2010-04-19	2010	3	Thysanoptera larva	8	38.2775
Restored	2010-04-19	2010	3	Cicadellidae nymph	2	9.56938
Restored	2010-04-19	2010	3	Coleoptera	2	9.56938
Restored	2010-04-19	2010	3	Phoridae	2	9.56938
Restored	2010-04-19	2010	3	Psyllidae	1	4.78469
Restored	2010-04-19	2010	3	Entomobryomorpha/Poduromorpha	3	14.3541
Restored	2010-04-19	2010	3	Araneae	1	4.78469
Restored	2010-04-19	2010	3	Aphidoidea	29	138.756
Restored	2010-04-19	2010	3	Psocoptera	3	14.3541
Restored	2010-04-19	2010	3	Cicadellidae	1	4.78469
Restored	2010-04-19	2010	3	Coleoptera	1	4.78469
Restored	2010-04-19	2010	3	Tipulidae	1	4.78469
Restored	2010-04-19	2010	3	Thysanoptera	1	4.78469
Restored	2010-04-19	2010	3	Chironomidae	18	86.1244
Restored	2010-04-19	2010	3	Cecidomyiidae	4	19.1388
Restored	2010-04-19	2010	3	Sminthuridae	1	4.78469
Restored	2010-04-19	2010	3	Acari	2	9.56938
Restored	2010-04-19	2010	3	Entomobryomorpha/Poduromorpha	35	167.464
Restored	2010-04-19	2010	3	Entomobryomorpha/Poduromorpha	10	47.8469
Restored	2010-04-19	2010	3	Sciaridae	7	33.4928
Restored	2010-04-19	2010	4	Thysanoptera larva	3	14.3541
Restored	2010-04-19	2010	4	Coleoptera larva	1	4.78469
Restored	2010-04-19	2010	4	Cecidomyiidae larva	4	19.1388
Restored	2010-04-19	2010	4	Psyllidae	1	4.78469
Restored	2010-04-19	2010	4	Phoridae	2	9.56938
Restored	2010-04-19	2010	4	Cicadellidae nymph	3	14.3541
Restored	2010-04-19	2010	4	Psocoptera	1	4.78469
Restored	2010-04-19	2010	4	Araneae	1	4.78469
Restored	2010-04-19	2010	4	Hymenoptera	1	4.78469
Restored	2010-04-19	2010	4	Hymenoptera	1	4.78469
Restored	2010-04-19	2010	4	Hymenoptera	1	4.78469
Restored	2010-04-19	2010	4	Coleoptera	1	4.78469
Restored	2010-04-19	2010	4	Chironomidae	15	71.7703
Restored	2010-04-19	2010	4	Cecidomyiidae	10	47.8469
Restored	2010-04-19	2010	4	Sminthuridae	1	4.78469
Restored	2010-04-19	2010	4	Acari	4	19.1388
Restored	2010-04-19	2010	4	Aphidoidea	13	62.201
Restored	2010-04-19	2010	4	Entomobryomorpha/Poduromorpha	6	28.7081
Restored	2010-04-19	2010	4	Entomobryomorpha/Poduromorpha	4	19.1388
Restored	2010-04-19	2010	4	Sciaridae	15	71.7703
Restored	2010-04-19	2010	4	Thysanoptera larva	9	43.0622
Restored	2010-04-19	2010	5	Cicadellidae nymph	2	9.56938
Restored	2010-04-19	2010	5	Psocoptera	1	4.78469
Restored	2010-04-19	2010	5	Ichneumonidae	1	4.78469
Restored	2010-04-19	2010	5	Coleoptera	1	4.78469
Restored	2010-04-19	2010	5	Muscomorpha	1	4.78469
Restored	2010-04-19	2010	5	Psocoptera	1	4.78469
Restored	2010-04-19	2010	5	Chironomidae	13	62.201
Restored	2010-04-19	2010	5	Cecidomyiidae	4	19.1388
Restored	2010-04-19	2010	5	Sminthuridae	2	9.56938
Restored	2010-04-19	2010	5	Acari	2	9.56938
Restored	2010-04-19	2010	5	Aphidoidea	16	76.555
Restored	2010-04-19	2010	5	Entomobryomorpha/Poduromorpha	10	47.8469
Restored	2010-04-19	2010	5	Entomobryomorpha/Poduromorpha	12	57.4163
Restored	2010-04-19	2010	5	Sciaridae	15	71.7703
Restored	2010-04-19	2010	5	Hemiptera nymph	2	9.56938
Restored	2010-04-19	2010	6	Hemiptera	2	9.56938
Restored	2010-04-19	2010	6	Coleoptera	1	4.78469
Restored	2010-04-19	2010	6	Entomobryomorpha/Poduromorpha	5	23.9234
Restored	2010-04-19	2010	6	Cicadellidae nymph	4	19.1388
Restored	2010-04-19	2010	6	Psocoptera nymph	11	52.6316
Restored	2010-04-19	2010	6	Psocoptera	5	23.9234
Restored	2010-04-19	2010	6	Neuroptera	1	4.78469
Restored	2010-04-19	2010	6	Dolichopodidae	2	9.56938
Restored	2010-04-19	2010	6	Tipulidae	1	4.78469
Restored	2010-04-19	2010	6	Cecidomyiidae larva	1	4.78469
Restored	2010-04-19	2010	6	Coleoptera	1	4.78469
Restored	2010-04-19	2010	6	Chironomidae	13	62.201
Restored	2010-04-19	2010	6	Cecidomyiidae	5	23.9234
Restored	2010-04-19	2010	6	Acari	6	28.7081
Restored	2010-04-19	2010	6	Aphidoidea	2	9.56938
Restored	2010-04-19	2010	6	Entomobryomorpha/Poduromorpha	13	62.201
Restored	2010-04-19	2010	6	Entomobryomorpha/Poduromorpha	4	19.1388
Restored	2010-04-19	2010	6	Sciaridae	3	14.3541
Restored	2010-04-19	2010	6	Thysanoptera larva	5	23.9234
Restored	2010-04-19	2010	6	Coleoptera	1	4.78469
Restored	2010-04-19	2010	6	Calliphoridae	1	4.78469
Restored	2010-04-19	2010	6	Hemiptera	1	4.78469
Restored	2010-04-19	2010	6	Hymenoptera	1	4.78469
Restored	2010-04-19	2010	6	Empididae	2	9.56938
Restored	2010-04-19	2010	6	Diptera	1	4.78469
Restored	2010-04-19	2010	6	Coleoptera	1	4.78469
Restored	2010-04-19	2010	7	Psocoptera	4	19.1388
Restored	2010-04-19	2010	7	Psocoptera nymph	5	23.9234
Restored	2010-04-19	2010	7	Sciaridae	1	4.78469
Restored	2010-04-19	2010	7	Psyllidae	2	9.56938
Restored	2010-04-19	2010	7	Tipulidae	3	14.3541
Restored	2010-04-19	2010	7	Cecidomyiidae	1	4.78469
Restored	2010-04-19	2010	7	Phoridae	2	9.56938
Restored	2010-04-19	2010	7	Tenthredinoidea	6	28.7081
Restored	2010-04-19	2010	7	Coleoptera	1	4.78469
Restored	2010-04-19	2010	7	Coleoptera	1	4.78469
Restored	2010-04-19	2010	7	Sphaeroceridae	1	4.78469
Restored	2010-04-19	2010	7	Chloropidae	1	4.78469
Restored	2010-04-19	2010	7	Chironomidae	6	28.7081
Restored	2010-04-19	2010	7	Cecidomyiidae	18	86.1244
Restored	2010-04-19	2010	7	Sminthuridae	6	28.7081
Restored	2010-04-19	2010	7	Acari	1	4.78469
Restored	2010-04-19	2010	7	Aphidoidea	13	62.201
Restored	2010-04-19	2010	7	Entomobryomorpha/Poduromorpha	1	4.78469
Reference	2010-05-21	2010	1	Acari	2	9.56938
Reference	2010-05-21	2010	1	Aphidoidea	3	14.3541
Reference	2010-05-21	2010	1	Aphidoidea	26	124.402
Reference	2010-05-21	2010	1	Araneae	1	4.78469
Reference	2010-05-21	2010	1	Hymenoptera	1	4.78469
Reference	2010-05-21	2010	1	Cecidomyiidae	1	4.78469
Reference	2010-05-21	2010	1	Ceratopogonidae	2	9.56938
Reference	2010-05-21	2010	1	Chironomidae	3	14.3541
Reference	2010-05-21	2010	1	Cicadellidae nymph	2	9.56938
Reference	2010-05-21	2010	1	Empididae	1	4.78469
Reference	2010-05-21	2010	1	Entomobryomorpha/Poduromorpha	54	258.373
Reference	2010-05-21	2010	1	Tenthredinoidea	1	4.78469
Reference	2010-05-21	2010	1	Entomobryomorpha/Poduromorpha	1	4.78469
Reference	2010-05-21	2010	1	Ichneumonidae	2	9.56938
Reference	2010-05-21	2010	1	Entomobryomorpha/Poduromorpha	1	4.78469
Reference	2010-05-21	2010	1	Phoridae	1	4.78469
Reference	2010-05-21	2010	1	Psocoptera nymph	5	23.9234
Reference	2010-05-21	2010	1	Psocoptera	4	19.1388
Reference	2010-05-21	2010	1	Psychodidae	2	9.56938
Reference	2010-05-21	2010	1	Sciaridae	4	19.1388
Reference	2010-05-21	2010	1	Thysanoptera	1	4.78469
Reference	2010-05-21	2010	1	Thysanoptera larva	13	62.201
Reference	2010-05-21	2010	1	Tipulidae	1	4.78469
Reference	2010-05-21	2010	2	Acari	3	14.3541
Reference	2010-05-21	2010	2	Aphidoidea	1	4.78469
Reference	2010-05-21	2010	2	Aphidoidea	4	19.1388
Reference	2010-05-21	2010	2	Araneae	3	14.3541
Reference	2010-05-21	2010	2	Cecidomyiidae	3	14.3541
Reference	2010-05-21	2010	2	Chironomidae	8	38.2775
Reference	2010-05-21	2010	2	Cicadellidae nymph	2	9.56938
Reference	2010-05-21	2010	2	Coleoptera	1	4.78469
Reference	2010-05-21	2010	2	Coleoptera larva	1	4.78469
Reference	2010-05-21	2010	2	Entomobryomorpha/Poduromorpha	18	86.1244
Reference	2010-05-21	2010	2	Hemiptera nymph	3	14.3541
Reference	2010-05-21	2010	2	Hemiptera nymph	4	19.1388
Reference	2010-05-21	2010	2	Tenthredinoidea	1	4.78469
Reference	2010-05-21	2010	2	Ichneumonidae	3	14.3541
Reference	2010-05-21	2010	2	Littorophiloscia richardsonae	1	4.78469
Reference	2010-05-21	2010	2	Opiliones	1	4.78469
Reference	2010-05-21	2010	2	Psocoptera nymph	3	14.3541
Reference	2010-05-21	2010	2	Psocoptera	2	9.56938
Reference	2010-05-21	2010	2	Sciaridae	2	9.56938
Reference	2010-05-21	2010	2	Coleoptera	1	4.78469
Reference	2010-05-21	2010	2	Thysanoptera	1	4.78469
Reference	2010-05-21	2010	2	Thysanoptera larva	8	38.2775
Reference	2010-05-21	2010	3	Acari	5	23.9234
Reference	2010-05-21	2010	3	Aphidoidea	1	4.78469
Reference	2010-05-21	2010	3	Aphidoidea	8	38.2775
Reference	2010-05-21	2010	3	Araneae	1	4.78469
Reference	2010-05-21	2010	3	Calliphoridae	1	4.78469
Reference	2010-05-21	2010	3	Cecidomyiidae	2	9.56938
Reference	2010-05-21	2010	3	Ceratopogonidae	1	4.78469
Reference	2010-05-21	2010	3	Chironomidae	9	43.0622
Reference	2010-05-21	2010	3	Cicadellidae nymph	2	9.56938
Reference	2010-05-21	2010	3	Entomobryomorpha/Poduromorpha	31	148.325
Reference	2010-05-21	2010	3	Hemiptera	4	19.1388
Reference	2010-05-21	2010	3	Tenthredinoidea	1	4.78469
Reference	2010-05-21	2010	3	Entomobryomorpha/Poduromorpha	7	33.4928
Reference	2010-05-21	2010	3	Ichneumonidae	2	9.56938
Reference	2010-05-21	2010	3	Insecta larva	1	4.78469
Reference	2010-05-21	2010	3	Muscomorpha	2	9.56938
Reference	2010-05-21	2010	3	Hymenoptera	1	4.78469
Reference	2010-05-21	2010	3	Opiliones	1	4.78469
Reference	2010-05-21	2010	3	Phoridae	2	9.56938
Reference	2010-05-21	2010	3	Porcellio scaber	1	4.78469
Reference	2010-05-21	2010	3	Psocoptera nymph	10	47.8469
Reference	2010-05-21	2010	3	Psocoptera	1	4.78469
Reference	2010-05-21	2010	3	Sciaridae	1	4.78469
Reference	2010-05-21	2010	3	Thysanoptera	1	4.78469
Reference	2010-05-21	2010	3	Thysanoptera larva	6	28.7081
Reference	2010-05-21	2010	3	Tipulidae	1	4.78469
Reference	2010-05-21	2010	4	Acari	1	4.78469
Reference	2010-05-21	2010	4	Aphidoidea	6	28.7081
Reference	2010-05-21	2010	4	Aphidoidea	18	86.1244
Reference	2010-05-21	2010	4	Araneae	3	14.3541
Reference	2010-05-21	2010	4	Chironomidae	22	105.263
Reference	2010-05-21	2010	4	Cicadellidae nymph	2	9.56938
Reference	2010-05-21	2010	4	Coleoptera	1	4.78469
Reference	2010-05-21	2010	4	Coleoptera	1	4.78469
Reference	2010-05-21	2010	4	Coleoptera	1	4.78469
Reference	2010-05-21	2010	4	Coleoptera	1	4.78469
Reference	2010-05-21	2010	4	Dermaptera nymph	2	9.56938
Reference	2010-05-21	2010	4	Entomobryomorpha/Poduromorpha	70	334.928
Reference	2010-05-21	2010	4	Formicidae	15	71.7703
Reference	2010-05-21	2010	4	Hemiptera nymph	3	14.3541
Reference	2010-05-21	2010	4	Hymenoptera	1	4.78469
Reference	2010-05-21	2010	4	Tenthredinoidea	2	9.56938
Reference	2010-05-21	2010	4	Entomobryomorpha/Poduromorpha	4	19.1388
Reference	2010-05-21	2010	4	Littorophiloscia richardsonae	3	14.3541
Reference	2010-05-21	2010	4	Muscomorpha	1	4.78469
Reference	2010-05-21	2010	4	Opiliones	1	4.78469
Reference	2010-05-21	2010	4	Phoridae	1	4.78469
Reference	2010-05-21	2010	4	Psocoptera	3	14.3541
Reference	2010-05-21	2010	4	Psocoptera nymph	8	38.2775
Reference	2010-05-21	2010	4	Psychodidae	1	4.78469
Reference	2010-05-21	2010	4	Psychodidae	1	4.78469
Reference	2010-05-21	2010	4	Sciaridae	1	4.78469
Reference	2010-05-21	2010	4	Thysanoptera larva	16	76.555
Reference	2010-05-21	2010	4	Tipulidae	2	9.56938
Reference	2010-05-21	2010	5	Acari	2	9.56938
Reference	2010-05-21	2010	5	Aphidoidea	4	19.1388
Reference	2010-05-21	2010	5	Aphidoidea	38	181.818
Reference	2010-05-21	2010	5	Araneae	3	14.3541
Reference	2010-05-21	2010	5	Cecidomyiidae	3	14.3541
Reference	2010-05-21	2010	5	Ceratopogonidae	1	4.78469
Reference	2010-05-21	2010	5	Chironomidae	4	19.1388
Reference	2010-05-21	2010	5	Cicadellidae	1	4.78469
Reference	2010-05-21	2010	5	Coleoptera larva	1	4.78469
Reference	2010-05-21	2010	5	Coleoptera	1	4.78469
Reference	2010-05-21	2010	5	Entomobryomorpha/Poduromorpha	33	157.895
Reference	2010-05-21	2010	5	Hemiptera nymph	3	14.3541
Reference	2010-05-21	2010	5	Hemiptera nymph	2	9.56938
Reference	2010-05-21	2010	5	Entomobryomorpha/Poduromorpha	2	9.56938
Reference	2010-05-21	2010	5	Ichneumonidae	4	19.1388
Reference	2010-05-21	2010	5	Insecta larva	2	9.56938
Reference	2010-05-21	2010	5	Entomobryomorpha/Poduromorpha	9	43.0622
Reference	2010-05-21	2010	5	Littorophiloscia richardsonae	1	4.78469
Reference	2010-05-21	2010	5	Mycetophilidae	1	4.78469
Reference	2010-05-21	2010	5	Phoridae	1	4.78469
Reference	2010-05-21	2010	5	Porcellio scaber	7	33.4928
Reference	2010-05-21	2010	5	Psocoptera nymph	11	52.6316
Reference	2010-05-21	2010	5	Sciaridae	1	4.78469
Reference	2010-05-21	2010	5	Thysanoptera	1	4.78469
Reference	2010-05-21	2010	5	Thysanoptera larva	18	86.1244
Reference	2010-05-21	2010	5	Tipulidae	1	4.78469
Reference	2010-05-21	2010	6	Acari	7	33.4928
Reference	2010-05-21	2010	6	Thysanoptera	1	4.78469
Reference	2010-05-21	2010	6	Hemiptera	1	4.78469
Reference	2010-05-21	2010	6	Aphidoidea	4	19.1388
Reference	2010-05-21	2010	6	Aphidoidea	44	210.526
Reference	2010-05-21	2010	6	Araneae	2	9.56938
Reference	2010-05-21	2010	6	Ceratopogonidae	1	4.78469
Reference	2010-05-21	2010	6	Chironomidae	12	57.4163
Reference	2010-05-21	2010	6	Cicadellidae nymph	1	4.78469
Reference	2010-05-21	2010	6	Coleoptera	1	4.78469
Reference	2010-05-21	2010	6	Coleoptera	2	9.56938
Reference	2010-05-21	2010	6	Coleoptera	1	4.78469
Reference	2010-05-21	2010	6	Coleoptera	1	4.78469
Reference	2010-05-21	2010	6	Dermaptera nymph	1	4.78469
Reference	2010-05-21	2010	6	Dolichopodidae	1	4.78469
Reference	2010-05-21	2010	6	Entomobryomorpha/Poduromorpha	44	210.526
Reference	2010-05-21	2010	6	Hemiptera nymph	2	9.56938
Reference	2010-05-21	2010	6	Hemiptera	4	19.1388
Reference	2010-05-21	2010	6	Hymenoptera	1	4.78469
Reference	2010-05-21	2010	6	Ichneumonidae	7	33.4928
Reference	2010-05-21	2010	6	Insecta larva	1	4.78469
Reference	2010-05-21	2010	6	Lepidoptera	1	4.78469
Reference	2010-05-21	2010	6	Muscomorpha	1	4.78469
Reference	2010-05-21	2010	6	Psocoptera nymph	12	57.4163
Reference	2010-05-21	2010	6	Psocoptera	3	14.3541
Reference	2010-05-21	2010	6	Sciaridae	1	4.78469
Reference	2010-05-21	2010	6	Thysanoptera	1	4.78469
Reference	2010-05-21	2010	6	Thysanoptera larva	13	62.201
Reference	2010-05-21	2010	6	Tipulidae	3	14.3541
Reference	2010-05-21	2010	7	Acari	5	23.9234
Reference	2010-05-21	2010	7	Aphidoidea	8	38.2775
Reference	2010-05-21	2010	7	Aphidoidea	58	277.512
Reference	2010-05-21	2010	7	Araneae	1	4.78469
Reference	2010-05-21	2010	7	Calliphoridae	1	4.78469
Reference	2010-05-21	2010	7	Cecidomyiidae	7	33.4928
Reference	2010-05-21	2010	7	Chironomidae	9	43.0622
Reference	2010-05-21	2010	7	Coleoptera	2	9.56938
Reference	2010-05-21	2010	7	Dermaptera nymph	1	4.78469
Reference	2010-05-21	2010	7	Entomobryomorpha/Poduromorpha	50	239.234
Reference	2010-05-21	2010	7	Hemiptera nymph	2	9.56938
Reference	2010-05-21	2010	7	Entomobryomorpha/Poduromorpha	1	4.78469
Reference	2010-05-21	2010	7	Ichneumonidae	2	9.56938
Reference	2010-05-21	2010	7	Entomobryomorpha/Poduromorpha	2	9.56938
Reference	2010-05-21	2010	7	Littorophiloscia richardsonae	1	4.78469
Reference	2010-05-21	2010	7	Hemiptera	1	4.78469
Reference	2010-05-21	2010	7	Mycetophilidae	3	14.3541
Reference	2010-05-21	2010	7	Porcellio scaber	1	4.78469
Reference	2010-05-21	2010	7	Psocoptera	6	28.7081
Reference	2010-05-21	2010	7	Psocoptera nymph	5	23.9234
Reference	2010-05-21	2010	7	Sciaridae	4	19.1388
Reference	2010-05-21	2010	7	Thysanoptera	1	4.78469
Reference	2010-05-21	2010	7	Thysanoptera larva	19	90.9091
Reference	2010-05-21	2010	7	Tipulidae	7	33.4928
Restored	2010-05-21	2010	1	Acari	1	4.78469
Restored	2010-05-21	2010	1	Aphidoidea	6	28.7081
Restored	2010-05-21	2010	1	Aphidoidea	48	229.665
Restored	2010-05-21	2010	1	Calliphoridae	1	4.78469
Restored	2010-05-21	2010	1	Cecidomyiidae	8	38.2775
Restored	2010-05-21	2010	1	Ceratopogonidae	1	4.78469
Restored	2010-05-21	2010	1	Chironomidae	15	71.7703
Restored	2010-05-21	2010	1	Cicadellidae	1	4.78469
Restored	2010-05-21	2010	1	Cicadellidae nymph	4	19.1388
Restored	2010-05-21	2010	1	Coniopterygidae	1	4.78469
Restored	2010-05-21	2010	1	Entomobryomorpha/Poduromorpha	36	172.249
Restored	2010-05-21	2010	1	Ephydridae	2	9.56938
Restored	2010-05-21	2010	1	Hemiptera nymph	2	9.56938
Restored	2010-05-21	2010	1	Hemiptera nymph	2	9.56938
Restored	2010-05-21	2010	1	Ichneumonidae	4	19.1388
Restored	2010-05-21	2010	1	Insecta larva	3	14.3541
Restored	2010-05-21	2010	1	Entomobryomorpha/Poduromorpha	2	9.56938
Restored	2010-05-21	2010	1	Muscomorpha	2	9.56938
Restored	2010-05-21	2010	1	Phoridae	2	9.56938
Restored	2010-05-21	2010	1	Psocoptera	5	23.9234
Restored	2010-05-21	2010	1	Psocoptera nymph	2	9.56938
Restored	2010-05-21	2010	1	Psyllidae	3	14.3541
Restored	2010-05-21	2010	1	Psyllidae nymph	9	43.0622
Restored	2010-05-21	2010	1	Sciaridae	11	52.6316
Restored	2010-05-21	2010	1	Thysanoptera	1	4.78469
Restored	2010-05-21	2010	1	Tipulidae	1	4.78469
Restored	2010-05-21	2010	2	Acari	4	19.1388
Restored	2010-05-21	2010	2	Hemiptera	1	4.78469
Restored	2010-05-21	2010	2	Aphidoidea	8	38.2775
Restored	2010-05-21	2010	2	Aphidoidea	22	105.263
Restored	2010-05-21	2010	2	Araneae	1	4.78469
Restored	2010-05-21	2010	2	Calliphoridae	2	9.56938
Restored	2010-05-21	2010	2	Cecidomyiidae	8	38.2775
Restored	2010-05-21	2010	2	Chironomidae	19	90.9091
Restored	2010-05-21	2010	2	Cicadellidae nymph	4	19.1388
Restored	2010-05-21	2010	2	Coleoptera	2	9.56938
Restored	2010-05-21	2010	2	Dolichopodidae	1	4.78469
Restored	2010-05-21	2010	2	Entomobryomorpha/Poduromorpha	169	808.612
Restored	2010-05-21	2010	2	Entomobryomorpha/Poduromorpha	2	9.56938
Restored	2010-05-21	2010	2	Ichneumonidae	7	33.4928
Restored	2010-05-21	2010	2	Entomobryomorpha/Poduromorpha	8	38.2775
Restored	2010-05-21	2010	2	Lepidoptera	1	4.78469
Restored	2010-05-21	2010	2	Muscomorpha	9	43.0622
Restored	2010-05-21	2010	2	Mycetophilidae	3	14.3541
Restored	2010-05-21	2010	2	Phoridae	7	33.4928
Restored	2010-05-21	2010	2	Psocoptera nymph	4	19.1388
Restored	2010-05-21	2010	2	Psocoptera	5	23.9234
Restored	2010-05-21	2010	2	Psychodidae	3	14.3541
Restored	2010-05-21	2010	2	Psyllidae nymph	9	43.0622
Restored	2010-05-21	2010	2	Psyllidae	2	9.56938
Restored	2010-05-21	2010	2	Sciaridae	21	100.478
Restored	2010-05-21	2010	2	Sminthuridae	1	4.78469
Restored	2010-05-21	2010	2	Thysanoptera	2	9.56938
Restored	2010-05-21	2010	2	Thysanoptera larva	1	4.78469
Restored	2010-05-21	2010	2	Tipulidae	5	23.9234
Restored	2010-05-21	2010	3	Acari	4	19.1388
Restored	2010-05-21	2010	3	Aphidoidea	1	4.78469
Restored	2010-05-21	2010	3	Aphidoidea	53	253.589
Restored	2010-05-21	2010	3	Calliphoridae	2	9.56938
Restored	2010-05-21	2010	3	Cecidomyiidae	11	52.6316
Restored	2010-05-21	2010	3	Ceratopogonidae	1	4.78469
Restored	2010-05-21	2010	3	Chironomidae	14	66.9856
Restored	2010-05-21	2010	3	Cicadellidae nymph	1	4.78469
Restored	2010-05-21	2010	3	Coleoptera	1	4.78469
Restored	2010-05-21	2010	3	Empididae	1	4.78469
Restored	2010-05-21	2010	3	Entomobryomorpha/Poduromorpha	125	598.086
Restored	2010-05-21	2010	3	Entomobryomorpha/Poduromorpha	2	9.56938
Restored	2010-05-21	2010	3	Ichneumonidae	12	57.4163
Restored	2010-05-21	2010	3	Insecta larva	2	9.56938
Restored	2010-05-21	2010	3	Neuroptera	1	4.78469
Restored	2010-05-21	2010	3	Entomobryomorpha/Poduromorpha	3	14.3541
Restored	2010-05-21	2010	3	Muscomorpha	1	4.78469
Restored	2010-05-21	2010	3	Phoridae	2	9.56938
Restored	2010-05-21	2010	3	Porcellio scaber	1	4.78469
Restored	2010-05-21	2010	3	Psocoptera	10	47.8469
Restored	2010-05-21	2010	3	Psocoptera nymph	10	47.8469
Restored	2010-05-21	2010	3	Psyllidae nymph	4	19.1388
Restored	2010-05-21	2010	3	Sciaridae	15	71.7703
Restored	2010-05-21	2010	3	Sminthuridae	3	14.3541
Restored	2010-05-21	2010	3	Thysanoptera	2	9.56938
Restored	2010-05-21	2010	3	Thysanoptera larva	7	33.4928
Restored	2010-05-21	2010	3	Tipulidae	1	4.78469
Restored	2010-05-21	2010	4	Aphidoidea	1	4.78469
Restored	2010-05-21	2010	4	Aphidoidea	16	76.555
Restored	2010-05-21	2010	4	Calliphoridae	2	9.56938
Restored	2010-05-21	2010	4	Cecidomyiidae	6	28.7081
Restored	2010-05-21	2010	4	Chironomidae	8	38.2775
Restored	2010-05-21	2010	4	Entomobryomorpha/Poduromorpha	5	23.9234
Restored	2010-05-21	2010	4	Hemiptera nymph	5	23.9234
Restored	2010-05-21	2010	4	Hymenoptera	1	4.78469
Restored	2010-05-21	2010	4	Entomobryomorpha/Poduromorpha	2	9.56938
Restored	2010-05-21	2010	4	Ichneumonidae	3	14.3541
Restored	2010-05-21	2010	4	Insecta larva	1	4.78469
Restored	2010-05-21	2010	4	Entomobryomorpha/Poduromorpha	1	4.78469
Restored	2010-05-21	2010	4	Muscomorpha	4	19.1388
Restored	2010-05-21	2010	4	Phoridae	1	4.78469
Restored	2010-05-21	2010	4	Psocoptera nymph	7	33.4928
Restored	2010-05-21	2010	4	Psocoptera	5	23.9234
Restored	2010-05-21	2010	4	Psyllidae nymph	1	4.78469
Restored	2010-05-21	2010	4	Sciaridae	8	38.2775
Restored	2010-05-21	2010	4	Sminthuridae	15	71.7703
Restored	2010-05-21	2010	4	Sphaeroceridae	1	4.78469
Restored	2010-05-21	2010	4	Thysanoptera larva	2	9.56938
Restored	2010-05-21	2010	5	Aphidoidea	7	33.4928
Restored	2010-05-21	2010	5	Aphidoidea	12	57.4163
Restored	2010-05-21	2010	5	Araneae	2	9.56938
Restored	2010-05-21	2010	5	Calliphoridae	1	4.78469
Restored	2010-05-21	2010	5	Cecidomyiidae	6	28.7081
Restored	2010-05-21	2010	5	Chironomidae	12	57.4163
Restored	2010-05-21	2010	5	Cicadellidae nymph	2	9.56938
Restored	2010-05-21	2010	5	Coleoptera	7	33.4928
Restored	2010-05-21	2010	5	Entomobryomorpha/Poduromorpha	25	119.617
Restored	2010-05-21	2010	5	Tenthredinoidea	1	4.78469
Restored	2010-05-21	2010	5	Entomobryomorpha/Poduromorpha	1	4.78469
Restored	2010-05-21	2010	5	Ichneumonidae	5	23.9234
Restored	2010-05-21	2010	5	Muscomorpha	1	4.78469
Restored	2010-05-21	2010	5	Opiliones	1	4.78469
Restored	2010-05-21	2010	5	Phoridae	1	4.78469
Restored	2010-05-21	2010	5	Psocoptera	7	33.4928
Restored	2010-05-21	2010	5	Psocoptera nymph	2	9.56938
Restored	2010-05-21	2010	5	Sciaridae	3	14.3541
Restored	2010-05-21	2010	5	Sciaridae	2	9.56938
Restored	2010-05-21	2010	5	Sminthuridae	15	71.7703
Restored	2010-05-21	2010	5	Thysanoptera larva	6	28.7081
Restored	2010-05-21	2010	5	Thysanoptera larva	1	4.78469
Restored	2010-05-21	2010	6	Acari	3	14.3541
Restored	2010-05-21	2010	6	Aphidoidea	2	9.56938
Restored	2010-05-21	2010	6	Aphidoidea	17	81.3397
Restored	2010-05-21	2010	6	Cecidomyiidae	10	47.8469
Restored	2010-05-21	2010	6	Ceratopogonidae	4	19.1388
Restored	2010-05-21	2010	6	Chironomidae	9	43.0622
Restored	2010-05-21	2010	6	Cicadellidae nymph	5	23.9234
Restored	2010-05-21	2010	6	Coleoptera	2	9.56938
Restored	2010-05-21	2010	6	Diptera	1	4.78469
Restored	2010-05-21	2010	6	Dolichopodidae	1	4.78469
Restored	2010-05-21	2010	6	Entomobryomorpha/Poduromorpha	1	4.78469
Restored	2010-05-21	2010	6	Hemiptera nymph	3	14.3541
Restored	2010-05-21	2010	6	Hemiptera nymph	3	14.3541
Restored	2010-05-21	2010	6	Entomobryomorpha/Poduromorpha	2	9.56938
Restored	2010-05-21	2010	6	Ichneumonidae	5	23.9234
Restored	2010-05-21	2010	6	Insecta larva	1	4.78469
Restored	2010-05-21	2010	6	Muscomorpha	2	9.56938
Restored	2010-05-21	2010	6	Phoridae	2	9.56938
Restored	2010-05-21	2010	6	Psocoptera nymph	7	33.4928
Restored	2010-05-21	2010	6	Psocoptera	5	23.9234
Restored	2010-05-21	2010	6	Psyllidae nymph	3	14.3541
Restored	2010-05-21	2010	6	Sciaridae	4	19.1388
Restored	2010-05-21	2010	6	Sminthuridae	7	33.4928
Restored	2010-05-21	2010	6	Thysanoptera	1	4.78469
Restored	2010-05-21	2010	6	Thysanoptera larva	15	71.7703
Restored	2010-05-21	2010	6	Tipulidae	1	4.78469
Restored	2010-05-21	2010	7	Acari	3	14.3541
Restored	2010-05-21	2010	7	Aphidoidea	6	28.7081
Restored	2010-05-21	2010	7	Aphidoidea	16	76.555
Restored	2010-05-21	2010	7	Araneae	1	4.78469
Restored	2010-05-21	2010	7	Cecidomyiidae	3	14.3541
Restored	2010-05-21	2010	7	Ceratopogonidae	2	9.56938
Restored	2010-05-21	2010	7	Chironomidae	6	28.7081
Restored	2010-05-21	2010	7	Coleoptera	1	4.78469
Restored	2010-05-21	2010	7	Coleoptera	2	9.56938
Restored	2010-05-21	2010	7	Coleoptera	1	4.78469
Restored	2010-05-21	2010	7	Entomobryomorpha/Poduromorpha	1	4.78469
Restored	2010-05-21	2010	7	Tenthredinoidea	3	14.3541
Restored	2010-05-21	2010	7	Entomobryomorpha/Poduromorpha	2	9.56938
Restored	2010-05-21	2010	7	Ichneumonidae	6	28.7081
Restored	2010-05-21	2010	7	Muscomorpha	5	23.9234
Restored	2010-05-21	2010	7	Phoridae	3	14.3541
Restored	2010-05-21	2010	7	Psocoptera	5	23.9234
Restored	2010-05-21	2010	7	Psocoptera nymph	1	4.78469
Restored	2010-05-21	2010	7	Sciaridae	6	28.7081
Restored	2010-05-21	2010	7	Sminthuridae	1	4.78469
Restored	2010-05-21	2010	7	Thysanoptera larva	13	62.201
Restored	2010-05-21	2010	7	Tipulidae	1	4.78469
Reference	2010-06-04	2010	1	Acari	10	47.8469
Reference	2010-06-04	2010	1	Aphidoidea	51	244.019
Reference	2010-06-04	2010	1	Araneae	1	4.78469
Reference	2010-06-04	2010	1	Chironomidae	8	38.2775
Reference	2010-06-04	2010	1	Coleoptera	1	4.78469
Reference	2010-06-04	2010	1	Coleoptera	1	4.78469
Reference	2010-06-04	2010	1	Dermaptera nymph	1	4.78469
Reference	2010-06-04	2010	1	Entomobryomorpha/Poduromorpha	20	95.6938
Reference	2010-06-04	2010	1	Hymenoptera	1	4.78469
Reference	2010-06-04	2010	1	Tenthredinoidea	1	4.78469
Reference	2010-06-04	2010	1	Ichneumonidae	4	19.1388
Reference	2010-06-04	2010	1	Insecta larva	2	9.56938
Reference	2010-06-04	2010	1	Entomobryomorpha/Poduromorpha	6	28.7081
Reference	2010-06-04	2010	1	Muscomorpha	2	9.56938
Reference	2010-06-04	2010	1	Phoridae	4	19.1388
Reference	2010-06-04	2010	1	Porcellio scaber	1	4.78469
Reference	2010-06-04	2010	1	Psocoptera nymph	8	38.2775
Reference	2010-06-04	2010	1	Psocoptera	2	9.56938
Reference	2010-06-04	2010	1	Sciaridae	7	33.4928
Reference	2010-06-04	2010	1	Sminthuridae	1	4.78469
Reference	2010-06-04	2010	1	Thysanoptera	1	4.78469
Reference	2010-06-04	2010	1	Thysanoptera larva	7	33.4928
Reference	2010-06-04	2010	2	Acari	2	9.56938
Reference	2010-06-04	2010	2	Aphidoidea	2	9.56938
Reference	2010-06-04	2010	2	Aphidoidea	55	263.158
Reference	2010-06-04	2010	2	Araneae	1	4.78469
Reference	2010-06-04	2010	2	Cecidomyiidae	2	9.56938
Reference	2010-06-04	2010	2	Chironomidae	7	33.4928
Reference	2010-06-04	2010	2	Cicadellidae nymph	1	4.78469
Reference	2010-06-04	2010	2	Coleoptera	1	4.78469
Reference	2010-06-04	2010	2	Coniopterygidae	1	4.78469
Reference	2010-06-04	2010	2	Dermaptera nymph	1	4.78469
Reference	2010-06-04	2010	2	Diptera pupa	1	4.78469
Reference	2010-06-04	2010	2	Entomobryomorpha/Poduromorpha	61	291.866
Reference	2010-06-04	2010	2	Hemiptera nymph	1	4.78469
Reference	2010-06-04	2010	2	Ichneumonidae	1	4.78469
Reference	2010-06-04	2010	2	Entomobryomorpha/Poduromorpha	3	14.3541
Reference	2010-06-04	2010	2	Littorophiloscia richardsonae	4	19.1388
Reference	2010-06-04	2010	2	Hymenoptera	3	14.3541
Reference	2010-06-04	2010	2	Psocoptera nymph	12	57.4163
Reference	2010-06-04	2010	2	Sminthuridae	1	4.78469
Reference	2010-06-04	2010	2	Thysanoptera larva	4	19.1388
Reference	2010-06-04	2010	3	Acari	3	14.3541
Reference	2010-06-04	2010	3	Aphidoidea	1	4.78469
Reference	2010-06-04	2010	3	Aphidoidea	27	129.187
Reference	2010-06-04	2010	3	Araneae	2	9.56938
Reference	2010-06-04	2010	3	Calliphoridae	2	9.56938
Reference	2010-06-04	2010	3	Cecidomyiidae	4	19.1388
Reference	2010-06-04	2010	3	Chironomidae	7	33.4928
Reference	2010-06-04	2010	3	Cicadellidae nymph	1	4.78469
Reference	2010-06-04	2010	3	Diptera	1	4.78469
Reference	2010-06-04	2010	3	Entomobryomorpha/Poduromorpha	93	444.976
Reference	2010-06-04	2010	3	Formicidae	1	4.78469
Reference	2010-06-04	2010	3	Hymenoptera	1	4.78469
Reference	2010-06-04	2010	3	Ichneumonidae	2	9.56938
Reference	2010-06-04	2010	3	Entomobryomorpha/Poduromorpha	2	9.56938
Reference	2010-06-04	2010	3	Littorophiloscia richardsonae	1	4.78469
Reference	2010-06-04	2010	3	Muscomorpha	1	4.78469
Reference	2010-06-04	2010	3	Phoridae	1	4.78469
Reference	2010-06-04	2010	3	Psocoptera	1	4.78469
Reference	2010-06-04	2010	3	Psocoptera nymph	2	9.56938
Reference	2010-06-04	2010	3	Sciaridae	7	33.4928
Reference	2010-06-04	2010	3	Thysanoptera larva	1	4.78469
Reference	2010-06-04	2010	3	Thysanoptera larva	7	33.4928
Reference	2010-06-04	2010	4	Acari	2	9.56938
Reference	2010-06-04	2010	4	Anthomyiidae	1	4.78469
Reference	2010-06-04	2010	4	Aphidoidea	1	4.78469
Reference	2010-06-04	2010	4	Aphidoidea	47	224.88
Reference	2010-06-04	2010	4	Araneae	2	9.56938
Reference	2010-06-04	2010	4	Cecidomyiidae	2	9.56938
Reference	2010-06-04	2010	4	Chironomidae	6	28.7081
Reference	2010-06-04	2010	4	Cicadellidae nymph	1	4.78469
Reference	2010-06-04	2010	4	Coleoptera	1	4.78469
Reference	2010-06-04	2010	4	Coleoptera	1	4.78469
Reference	2010-06-04	2010	4	Coleoptera	1	4.78469
Reference	2010-06-04	2010	4	Dermaptera nymph	1	4.78469
Reference	2010-06-04	2010	4	Diptera	1	4.78469
Reference	2010-06-04	2010	4	Entomobryomorpha/Poduromorpha	56	267.943
Reference	2010-06-04	2010	4	Ichneumonidae	1	4.78469
Reference	2010-06-04	2010	4	Entomobryomorpha/Poduromorpha	3	14.3541
Reference	2010-06-04	2010	4	Muscomorpha	1	4.78469
Reference	2010-06-04	2010	4	Phoridae	1	4.78469
Reference	2010-06-04	2010	4	Psocoptera	1	4.78469
Reference	2010-06-04	2010	4	Psocoptera nymph	11	52.6316
Reference	2010-06-04	2010	4	Sciaridae	7	33.4928
Reference	2010-06-04	2010	4	Sminthuridae	2	9.56938
Reference	2010-06-04	2010	4	Thysanoptera	2	9.56938
Reference	2010-06-04	2010	4	Thysanoptera larva	3	14.3541
Reference	2010-06-04	2010	5	Aphidoidea	2	9.56938
Reference	2010-06-04	2010	5	Aphidoidea	34	162.679
Reference	2010-06-04	2010	5	Araneae	2	9.56938
Reference	2010-06-04	2010	5	Hymenoptera	2	9.56938
Reference	2010-06-04	2010	5	Cecidomyiidae	19	90.9091
Reference	2010-06-04	2010	5	Ceratopogonidae	1	4.78469
Reference	2010-06-04	2010	5	Chironomidae	3	14.3541
Reference	2010-06-04	2010	5	Cicadellidae nymph	2	9.56938
Reference	2010-06-04	2010	5	Coleoptera	3	14.3541
Reference	2010-06-04	2010	5	Coleoptera	2	9.56938
Reference	2010-06-04	2010	5	Dermaptera nymph	1	4.78469
Reference	2010-06-04	2010	5	Diptera	1	4.78469
Reference	2010-06-04	2010	5	Entomobryomorpha/Poduromorpha	176	842.105
Reference	2010-06-04	2010	5	Hemiptera nymph	2	9.56938
Reference	2010-06-04	2010	5	Hymenoptera	1	4.78469
Reference	2010-06-04	2010	5	Entomobryomorpha/Poduromorpha	5	23.9234
Reference	2010-06-04	2010	5	Ichneumonidae	11	52.6316
Reference	2010-06-04	2010	5	Entomobryomorpha/Poduromorpha	92	440.191
Reference	2010-06-04	2010	5	Littorophiloscia richardsonae	1	4.78469
Reference	2010-06-04	2010	5	Hemiptera	1	4.78469
Reference	2010-06-04	2010	5	Phoridae	7	33.4928
Reference	2010-06-04	2010	5	Porcellio scaber	6	28.7081
Reference	2010-06-04	2010	5	Psocoptera nymph	35	167.464
Reference	2010-06-04	2010	5	Sciaridae	6	28.7081
Reference	2010-06-04	2010	5	Sminthuridae	4	19.1388
Reference	2010-06-04	2010	5	Thysanoptera larva	1	4.78469
Reference	2010-06-04	2010	5	Tipulidae	1	4.78469
Reference	2010-06-04	2010	6	Acari	4	19.1388
Reference	2010-06-04	2010	6	Agromyzidae	1	4.78469
Reference	2010-06-04	2010	6	Aphidoidea	2	9.56938
Reference	2010-06-04	2010	6	Aphidoidea	45	215.311
Reference	2010-06-04	2010	6	Araneae	1	4.78469
Reference	2010-06-04	2010	6	Cecidomyiidae	12	57.4163
Reference	2010-06-04	2010	6	Chironomidae	6	28.7081
Reference	2010-06-04	2010	6	Cicadellidae nymph	3	14.3541
Reference	2010-06-04	2010	6	Coleoptera	1	4.78469
Reference	2010-06-04	2010	6	Coleoptera	1	4.78469
Reference	2010-06-04	2010	6	Empididae	1	4.78469
Reference	2010-06-04	2010	6	Entomobryomorpha/Poduromorpha	123	588.517
Reference	2010-06-04	2010	6	Hemiptera nymph	3	14.3541
Reference	2010-06-04	2010	6	Ichneumonidae	8	38.2775
Reference	2010-06-04	2010	6	Insecta larva	2	9.56938
Reference	2010-06-04	2010	6	Trichoptera	1	4.78469
Reference	2010-06-04	2010	6	Entomobryomorpha/Poduromorpha	12	57.4163
Reference	2010-06-04	2010	6	Lepidoptera	2	9.56938
Reference	2010-06-04	2010	6	Muscomorpha	1	4.78469
Reference	2010-06-04	2010	6	Hymenoptera	1	4.78469
Reference	2010-06-04	2010	6	Psocoptera	7	33.4928
Reference	2010-06-04	2010	6	Psocoptera nymph	13	62.201
Reference	2010-06-04	2010	6	Sciaridae	3	14.3541
Reference	2010-06-04	2010	6	Sminthuridae	1	4.78469
Reference	2010-06-04	2010	6	Thysanoptera	1	4.78469
Reference	2010-06-04	2010	6	Thysanoptera larva	1	4.78469
Reference	2010-06-04	2010	6	Tipulidae	1	4.78469
Reference	2010-06-04	2010	7	Acari	5	23.9234
Reference	2010-06-04	2010	7	Aphidoidea	74	354.067
Reference	2010-06-04	2010	7	Araneae	1	4.78469
Reference	2010-06-04	2010	7	Cecidomyiidae	23	110.048
Reference	2010-06-04	2010	7	Chironomidae	4	19.1388
Reference	2010-06-04	2010	7	Cicadellidae nymph	3	14.3541
Reference	2010-06-04	2010	7	Coleoptera	2	9.56938
Reference	2010-06-04	2010	7	Coleoptera	1	4.78469
Reference	2010-06-04	2010	7	Entomobryomorpha/Poduromorpha	119	569.378
Reference	2010-06-04	2010	7	Entomobryomorpha/Poduromorpha	1	4.78469
Reference	2010-06-04	2010	7	Ichneumonidae	6	28.7081
Reference	2010-06-04	2010	7	Insecta larva	2	9.56938
Reference	2010-06-04	2010	7	Entomobryomorpha/Poduromorpha	7	33.4928
Reference	2010-06-04	2010	7	Muscomorpha	1	4.78469
Reference	2010-06-04	2010	7	Hymenoptera	1	4.78469
Reference	2010-06-04	2010	7	Porcellio scaber	1	4.78469
Reference	2010-06-04	2010	7	Psocoptera nymph	9	43.0622
Reference	2010-06-04	2010	7	Psocoptera	5	23.9234
Reference	2010-06-04	2010	7	Sciaridae	3	14.3541
Reference	2010-06-04	2010	7	Sminthuridae	1	4.78469
Reference	2010-06-04	2010	7	Thysanoptera larva	1	4.78469
Reference	2010-06-04	2010	7	Tipulidae	1	4.78469
Restored	2010-06-04	2010	1	Acari	3	14.3541
Restored	2010-06-04	2010	1	Aphidoidea	2	9.56938
Restored	2010-06-04	2010	1	Aphidoidea	32	153.11
Restored	2010-06-04	2010	1	Araneae	1	4.78469
Restored	2010-06-04	2010	1	Cecidomyiidae	5	23.9234
Restored	2010-06-04	2010	1	Chironomidae	15	71.7703
Restored	2010-06-04	2010	1	Cicadellidae nymph	3	14.3541
Restored	2010-06-04	2010	1	Coleoptera	2	9.56938
Restored	2010-06-04	2010	1	Dolichopodidae	1	4.78469
Restored	2010-06-04	2010	1	Entomobryomorpha/Poduromorpha	290	1387.56
Restored	2010-06-04	2010	1	Ichneumonidae	4	19.1388
Restored	2010-06-04	2010	1	Entomobryomorpha/Poduromorpha	17	81.3397
Restored	2010-06-04	2010	1	Coleoptera	1	4.78469
Restored	2010-06-04	2010	1	Hymenoptera	2	9.56938
Restored	2010-06-04	2010	1	Phoridae	8	38.2775
Restored	2010-06-04	2010	1	Psocoptera	5	23.9234
Restored	2010-06-04	2010	1	Psocoptera nymph	17	81.3397
Restored	2010-06-04	2010	1	Psyllidae	2	9.56938
Restored	2010-06-04	2010	1	Coleoptera	2	9.56938
Restored	2010-06-04	2010	1	Sciaridae	4	19.1388
Restored	2010-06-04	2010	1	Sminthuridae	19	90.9091
Restored	2010-06-04	2010	1	Thysanoptera larva	1	4.78469
Restored	2010-06-04	2010	2	Aphidoidea	3	14.3541
[truncated: 2,626 more rows]
[truncated: 1 more columns]
