# Supplementary material for: Quantifying the effectiveness of shoreline armoring removal on coastal biota of Puget Sound
Source: PeerJ. 2018 Feb 23;6:e4275. doi: 10.7717/peerj.4275 (PMC5825941; doi:10.7717/peerj.4275)
Supplement: Supplemental Information 6 — Dataset of insects sampled before and after shoreline armoring removal in Olympic Sculpture Park. [file peerj-06-4275-s006.xls]

## Sheet: all raw
Site	Date	Year	Replicate	Taxa	Coarse	Count	Density	Comments	Ref. Plt. #
Seawall	2011-04-27	2011	1	Hypogastruridae	Collembola	1	10
Seawall	2011-04-27	2011	1	Chironomidae	Diptera	1	10
Seawall	2011-04-27	2011	2	Ceratopogonidae	Diptera	1	10
Seawall	2011-04-27	2011	3	Hypogastruridae	Collembola	1	10
Seawall	2011-04-27	2011	3	Chironomidae	Diptera	2	20
Seawall	2011-04-27	2011	4	Chironomidae	Diptera	1	10
Seawall	2011-04-27	2011	5	Chironomidae	Diptera	1	10
Seawall	2011-04-27	2011	5	Formicidae	Hymenoptera	1	10
Seawall	2011-04-27	2011	6	Chironomidae	Diptera	4	40
Seawall	2011-04-27	2011	7	Chironomidae	Diptera	3	30
Vegetation Swath	2011-04-27	2011	1	Chironomidae	Diptera	2	20
Vegetation Swath	2011-04-27	2011	1	Tipulidae	Diptera	2	20
Vegetation Swath	2011-04-27	2011	1	Thripidae	Thysanoptera	1	10
Vegetation Swath	2011-04-27	2011	1	Diptera pupa	Diptera	1	10	saved # 1
Vegetation Swath	2011-04-27	2011	2	Entomobryidae	Collembola	4	40
Vegetation Swath	2011-04-27	2011	2	Psocoptera immature	Psocoptera	1	10
Vegetation Swath	2011-04-27	2011	2	Hypogastruridae	Collembola	1	10
Vegetation Swath	2011-04-27	2011	2	Aphididae	Hemiptera	2	20	2 wingless
Vegetation Swath	2011-04-27	2011	2	Chironomidae	Diptera	11	110
Vegetation Swath	2011-04-27	2011	3	Psyllidae immature	Hemiptera	2	20
Vegetation Swath	2011-04-27	2011	3	Aphididae	Hemiptera	2	20	2 wingless
Vegetation Swath	2011-04-27	2011	3	Cecidomyiidae	Diptera	1	10
Vegetation Swath	2011-04-27	2011	3	Tipulidae	Diptera	1	10
Vegetation Swath	2011-04-27	2011	3	Entomobryidae	Collembola	1	10
Vegetation Swath	2011-04-27	2011	3	Chironomidae	Diptera	3	30
Vegetation Swath	2011-04-27	2011	3	Sminthuridae	Collembola	1	10
Vegetation Swath	2011-04-27	2011	4	Tenthredinidae	Hymenoptera	1	10
Vegetation Swath	2011-04-27	2011	4	Aphididae	Hemiptera	3	30	3 wingless
Vegetation Swath	2011-04-27	2011	4	Chironomidae	Diptera	2	20
Vegetation Swath	2011-04-27	2011	4	Sminthuridae	Collembola	1	10
Vegetation Swath	2011-04-27	2011	5	Hypogastruridae	Collembola	2	20
Vegetation Swath	2011-04-27	2011	5	Chironomidae	Diptera	3	30
Vegetation Swath	2011-04-27	2011	5	Sminthuridae	Collembola	1	10
Vegetation Swath	2011-04-27	2011	5	Tenthredinidae	Hymenoptera	1	10
Vegetation Swath	2011-04-27	2011	6	Cicadellidae	Hemiptera	1	10
Vegetation Swath	2011-04-27	2011	6	Ephydridae	Diptera	1	10
Vegetation Swath	2011-04-27	2011	6	Tipulidae	Diptera	2	20
Vegetation Swath	2011-04-27	2011	6	Phoridae	Diptera	1	10
Vegetation Swath	2011-04-27	2011	6	Sminthuridae	Collembola	1	10
Vegetation Swath	2011-04-27	2011	7	Entomobryidae	Collembola	1	10
Vegetation Swath	2011-04-27	2011	7	Phoridae	Diptera	1	10
Vegetation Swath	2011-04-27	2011	7	Tenthredinidae	Hymenoptera	1	10
Vegetation Swath	2011-04-27	2011	7	Sciaridae	Diptera	1	10
Vegetation Swath	2011-04-27	2011	7	Acari	Acari	1	10
Vegetation Swath	2011-04-27	2011	7	Lepidoptera larva	Lepidoptera	1	10
Pocket Beach	2011-04-27	2011	1	Cecidomyiidae	Diptera	1	10
Pocket Beach	2011-04-27	2011	1	Chironomidae	Diptera	3	30
Pocket Beach	2011-04-27	2011	1	Phoridae	Diptera	1	10
Pocket Beach	2011-04-27	2011	2	Chironomidae	Diptera	3	30
Pocket Beach	2011-04-27	2011	2	Hypogastruridae	Collembola	1	10
Pocket Beach	2011-04-27	2011	2	Sminthuridae	Collembola	1	10
Pocket Beach	2011-04-27	2011	3	Chironomidae	Diptera	5	50
Pocket Beach	2011-04-27	2011	3	Acari	Acari	3	30
Pocket Beach	2011-04-27	2011	4	Chironomidae	Diptera	2	20
Pocket Beach	2011-04-27	2011	5	Sciaridae	Diptera	1	10
Pocket Beach	2011-04-27	2011	5	Chironomidae	Diptera	1	10
Pocket Beach	2011-04-27	2011	6	Sciaridae	Diptera	1	10
Pocket Beach	2011-04-27	2011	6	Chironomidae	Diptera	5	50
Pocket Beach	2011-04-27	2011	6	Aphididae	Hemiptera	1	10	1 wingless
Pocket Beach	2011-04-27	2011	7	Hypogastruridae	Collembola	1	10
Pocket Beach	2011-04-27	2011	7	Phoridae	Diptera	1	10
Pocket Beach	2011-04-27	2011	7	Chironomidae	Diptera	2	20
RipRap	2011-04-27	2011	1	Cecidomyiidae	Diptera	2	20
RipRap	2011-04-27	2011	1	Dryomyzidae	Diptera	5	50
RipRap	2011-04-27	2011	1	Isotomidae	Collembola	2	20
RipRap	2011-04-27	2011	1	Canacidae	Diptera	1	10
RipRap	2011-04-27	2011	1	Chironomidae	Diptera	2	20
RipRap	2011-04-27	2011	2	Dryomyzidae	Diptera	3	30
RipRap	2011-04-27	2011	2	Isotomidae	Collembola	9	90
RipRap	2011-04-27	2011	2	Chironomidae	Diptera	2	20
RipRap	2011-04-27	2011	3	Dryomyzidae	Diptera	6	60
RipRap	2011-04-27	2011	3	Acari	Acari	1	10
RipRap	2011-04-27	2011	3	Isotomidae	Collembola	4	40
RipRap	2011-04-27	2011	4	Chironomidae	Diptera	2	20
RipRap	2011-04-27	2011	4	Sciaridae	Diptera	1	10
RipRap	2011-04-27	2011	4	Sphaeroceridae	Diptera	1	10
RipRap	2011-04-27	2011	5	Isotomidae	Collembola	3	30
RipRap	2011-04-27	2011	5	Chironomidae	Diptera	5	50
RipRap	2011-04-27	2011	5	Dryomyzidae	Diptera	3	30
RipRap	2011-04-27	2011	6	Dryomyzidae	Diptera	1	10
RipRap	2011-04-27	2011	6	Phoridae	Diptera	1	10
RipRap	2011-04-27	2011	6	Acari	Acari	1	10
RipRap	2011-04-27	2011	6	Isotomidae	Collembola	2	20
RipRap	2011-04-27	2011	7	Dryomyzidae	Diptera	3	30
RipRap	2011-04-27	2011	7	Dolichopodidae	Diptera	2	20
RipRap	2011-04-27	2011	7	Chironomidae	Diptera	4	40
RipRap	2011-04-27	2011	7	Acari	Acari	1	10
RipRap	2011-04-27	2011	7	Isotomidae	Collembola	7	70
Riparian	2011-04-27	2011	1	no sample
Riparian	2011-04-27	2011	2	no sample
Riparian	2011-04-27	2011	3	Entomobryidae	Collembola	2	20
Riparian	2011-04-27	2011	3	Dryomyzidae	Diptera	1	10
Riparian	2011-04-27	2011	3	Isotomidae	Collembola	2	20
Riparian	2011-04-27	2011	3	Chironomidae	Diptera	1	10
Riparian	2011-04-27	2011	3	Muscidae	Diptera	1	10
Riparian	2011-04-27	2011	3	Opomyzidae	Diptera	1	10
Riparian	2011-04-27	2011	4	Entomobryidae	Collembola	3	30
Riparian	2011-04-27	2011	4	Sciaridae	Diptera	1	10
Riparian	2011-04-27	2011	4	Acari	Acari	1	10
Riparian	2011-04-27	2011	5	Sciaridae	Diptera	1	10
Riparian	2011-04-27	2011	5	Chironomidae	Diptera	5	50
Riparian	2011-04-27	2011	6	Chironomidae	Diptera	7	70
Riparian	2011-04-27	2011	6	Entomobryidae	Collembola	12	120
Riparian	2011-04-27	2011	6	Sciaridae	Diptera	1	10
Riparian	2011-04-27	2011	6	Sminthuridae	Collembola	1	10
Riparian	2011-04-27	2011	6	Psocoptera immature	Psocoptera	1	10
Riparian	2011-04-27	2011	6	Acari	Acari	4	40
Riparian	2011-04-27	2011	7	Psocoptera immature	Psocoptera	1	10
Riparian	2011-04-27	2011	7	Hypogastruridae	Collembola	1	10
Riparian	2011-04-27	2011	7	Chironomidae	Diptera	12	120
Riparian	2011-04-27	2011	7	Acari	Acari	2	20
Riparian	2011-04-27	2011	7	Entomobryidae	Collembola	1	10
Seawall	2011-05-10	2011	1	Chironomidae	Diptera	3	30
Seawall	2011-05-10	2011	2	Chironomidae	Diptera	2	20
Seawall	2011-05-10	2011	3	Ceratopogonidae	Diptera	1	10
Seawall	2011-05-10	2011	3	Chironomidae	Diptera	1	10
Seawall	2011-05-10	2011	3	Acari	Acari	2	20
Seawall	2011-05-10	2011	4	Ichneumonidae	Hymenoptera	1	10
Seawall	2011-05-10	2011	4	Tipulidae	Diptera	1	10
Seawall	2011-05-10	2011	4	Chironomidae	Diptera	1	10
Seawall	2011-05-10	2011	5	Psychodidae	Diptera	1	10
Seawall	2011-05-10	2011	5	Chironomidae	Diptera	4	40
Seawall	2011-05-10	2011	5	Sciaridae	Diptera	1	10
Seawall	2011-05-10	2011	5	Pteromalidae	Hymenoptera	1	10
Seawall	2011-05-10	2011	6	Psychodidae	Diptera	1	10
Seawall	2011-05-10	2011	7	Aphididae	Hemiptera	1	10	1 wingless
Seawall	2011-05-10	2011	7	Chironomidae	Diptera	1	10
Vegetation Swath	2011-05-10	2011	1	Sciaridae	Diptera	1	10
Vegetation Swath	2011-05-10	2011	1	Entomobryidae	Collembola	3	30
Vegetation Swath	2011-05-10	2011	1	Cicadellidae	Hemiptera	1	10
Vegetation Swath	2011-05-10	2011	1	Calliphoridae	Diptera	1	10
Vegetation Swath	2011-05-10	2011	2	Chironomidae	Diptera	2	20
Vegetation Swath	2011-05-10	2011	2	Cecidomyiidae	Diptera	1	10
Vegetation Swath	2011-05-10	2011	2	Hemiptera immature	Hemiptera	1	10
Vegetation Swath	2011-05-10	2011	2	Sminthuridae	Collembola	2	20
Vegetation Swath	2011-05-10	2011	2	Scelionidae	Hymenoptera	1	10
Vegetation Swath	2011-05-10	2011	3	Psyllidae	Hemiptera	1	10
Vegetation Swath	2011-05-10	2011	3	Sciaridae	Diptera	1	10
Vegetation Swath	2011-05-10	2011	3	Thysanoptera immature	Thysanoptera	1	10
Vegetation Swath	2011-05-10	2011	3	Psychodidae	Diptera	1	10
Vegetation Swath	2011-05-10	2011	3	Psyllidae immature	Hemiptera	1	10
Vegetation Swath	2011-05-10	2011	3	Onychiuridae	Collembola	1	10
Vegetation Swath	2011-05-10	2011	3	Chironomidae	Diptera	2	20
Vegetation Swath	2011-05-10	2011	3	Sminthuridae	Collembola	5	50
Vegetation Swath	2011-05-10	2011	3	Acari	Acari	18	180
Vegetation Swath	2011-05-10	2011	3	Isotomidae	Collembola	3	30
Vegetation Swath	2011-05-10	2011	3	Entomobryidae	Collembola	18	180
Vegetation Swath	2011-05-10	2011	4	Tenthredinidae	Hymenoptera	1	10
Vegetation Swath	2011-05-10	2011	4	Thysanoptera immature	Thysanoptera	1	10
Vegetation Swath	2011-05-10	2011	4	Hypogastruridae	Collembola	1	10
Vegetation Swath	2011-05-10	2011	4	Cicadellidae immature	Hemiptera	1	10
Vegetation Swath	2011-05-10	2011	4	Sciaridae	Diptera	1	10
Vegetation Swath	2011-05-10	2011	4	Tipulidae	Diptera	1	10
Vegetation Swath	2011-05-10	2011	4	Throscidae	Coleoptera	1	10
Vegetation Swath	2011-05-10	2011	4	Cecidomyiidae	Diptera	1	10
Vegetation Swath	2011-05-10	2011	4	Chloropidae	Diptera	1	10
Vegetation Swath	2011-05-10	2011	4	Chironomidae	Diptera	3	30
Vegetation Swath	2011-05-10	2011	4	Acari	Acari	2	20
Vegetation Swath	2011-05-10	2011	4	Entomobryidae	Collembola	8	80
Vegetation Swath	2011-05-10	2011	5	Sminthuridae	Collembola	4	40
Vegetation Swath	2011-05-10	2011	5	Acari	Acari	4	40
Vegetation Swath	2011-05-10	2011	5	Chironomidae	Diptera	2	20
Vegetation Swath	2011-05-10	2011	5	Scathophagidae	Diptera	1	10
Vegetation Swath	2011-05-10	2011	6	Hypogastruridae	Collembola	3	30
Vegetation Swath	2011-05-10	2011	6	Cecidomyiidae	Diptera	2	20
Vegetation Swath	2011-05-10	2011	6	Anthomyiidae	Diptera	1	10
Vegetation Swath	2011-05-10	2011	6	Chironomidae	Diptera	2	20
Vegetation Swath	2011-05-10	2011	6	Sminthuridae	Collembola	64	640
Vegetation Swath	2011-05-10	2011	6	Isotomidae	Collembola	1	10
Vegetation Swath	2011-05-10	2011	7	Cecidomyiidae	Diptera	3	30
Vegetation Swath	2011-05-10	2011	7	Hypogastruridae	Collembola	5	50
Vegetation Swath	2011-05-10	2011	7	Heteroceridae	Coleoptera	1	10
Vegetation Swath	2011-05-10	2011	7	Anthomyiidae	Diptera	2	20
Vegetation Swath	2011-05-10	2011	7	Chironomidae	Diptera	2	20
Vegetation Swath	2011-05-10	2011	7	Aphididae	Hemiptera	2	20	2 wingless
Vegetation Swath	2011-05-10	2011	7	Sminthuridae	Collembola	11	110
RipRap	2011-05-10	2011	1	Staphylinidae	Coleoptera	1	10
RipRap	2011-05-10	2011	1	Braconidae	Hymenoptera	1	10
RipRap	2011-05-10	2011	1	Chironomidae	Diptera	2	20
RipRap	2011-05-10	2011	1	Aphididae	Hemiptera	1	10	1 wingless
RipRap	2011-05-10	2011	1	Acari	Acari	3	30
RipRap	2011-05-10	2011	2	Staphylinidae	Coleoptera	1	10
RipRap	2011-05-10	2011	2	Dryomyzidae	Diptera	1	10
RipRap	2011-05-10	2011	2	Calliphoridae	Diptera	1	10
RipRap	2011-05-10	2011	2	Chironomidae	Diptera	8	80
RipRap	2011-05-10	2011	2	Acari	Acari	6	60
RipRap	2011-05-10	2011	3	Psychodidae	Diptera	1	10
RipRap	2011-05-10	2011	3	Sphaeroceridae	Diptera	1	10
RipRap	2011-05-10	2011	3	Dryomyzidae	Diptera	2	20
RipRap	2011-05-10	2011	3	Chironomidae	Diptera	11	110
RipRap	2011-05-10	2011	3	Acari	Acari	4	40
RipRap	2011-05-10	2011	4	Dryomyzidae	Diptera	11	110
RipRap	2011-05-10	2011	4	Tipulidae	Diptera	1	10
RipRap	2011-05-10	2011	4	Psocoptera immature	Psocoptera	1	10
RipRap	2011-05-10	2011	4	Chironomidae	Diptera	16	160
RipRap	2011-05-10	2011	4	Acari	Acari	1	10
RipRap	2011-05-10	2011	4	Isotomidae	Collembola	1	10
RipRap	2011-05-10	2011	5	Psychodidae	Diptera	1	10
RipRap	2011-05-10	2011	5	Hydrophilidae	Coleoptera	1	10
RipRap	2011-05-10	2011	5	Chironomidae	Diptera	2	20
RipRap	2011-05-10	2011	5	Isotomidae	Collembola	1	10
RipRap	2011-05-10	2011	6	Chironomidae	Diptera	1	10
RipRap	2011-05-10	2011	6	Acari	Acari	4	40
RipRap	2011-05-10	2011	7	Tipulidae	Diptera	1	10
RipRap	2011-05-10	2011	7	Chironomidae	Diptera	6	60
Pocket Beach	2011-05-10	2011	1	Sminthuridae	Collembola	2	20
Pocket Beach	2011-05-10	2011	1	Psocoptera immature	Psocoptera	1	10
Pocket Beach	2011-05-10	2011	1	Entomobryidae	Collembola	8	80
Pocket Beach	2011-05-10	2011	1	Acari	Acari	1	10
Pocket Beach	2011-05-10	2011	1	Chironomidae	Diptera	1	10
Pocket Beach	2011-05-10	2011	2	Cecidomyiidae	Diptera	1	10
Pocket Beach	2011-05-10	2011	2	Tipulidae	Diptera	1	10
Pocket Beach	2011-05-10	2011	2	Entomobryidae	Collembola	2	20
Pocket Beach	2011-05-10	2011	2	Aphididae	Hemiptera	1	10	1 wingless
Pocket Beach	2011-05-10	2011	2	Acari	Acari	2	20
Pocket Beach	2011-05-10	2011	2	Sminthuridae	Collembola	2	20
Pocket Beach	2011-05-10	2011	2	Chrysididae	Hymenoptera	1	10
Pocket Beach	2011-05-10	2011	3	Hemiptera immature	Hemiptera	1	10
Pocket Beach	2011-05-10	2011	3	Aphididae	Hemiptera	1	10	1 winged
Pocket Beach	2011-05-10	2011	3	Sciaridae	Diptera	1	10
Pocket Beach	2011-05-10	2011	3	Chrysididae	Hymenoptera	1	10
Pocket Beach	2011-05-10	2011	3	Chironomidae	Diptera	1	10
Pocket Beach	2011-05-10	2011	3	Tenthredinidae	Hymenoptera	1	10
Pocket Beach	2011-05-10	2011	4	Aphididae	Hemiptera	4	40	4 winged
Pocket Beach	2011-05-10	2011	4	Chironomidae	Diptera	1	10
Pocket Beach	2011-05-10	2011	4	Entomobryidae	Collembola	1	10
Pocket Beach	2011-05-10	2011	4	Halictidae	Hymenoptera	1	10
Pocket Beach	2011-05-10	2011	5	Cecidomyiidae	Diptera	2	20
Pocket Beach	2011-05-10	2011	5	Chironomidae	Diptera	3	30
Pocket Beach	2011-05-10	2011	5	Sminthuridae	Collembola	1	10
Pocket Beach	2011-05-10	2011	5	Entomobryidae	Collembola	2	20
Pocket Beach	2011-05-10	2011	5	Aphididae	Hemiptera	1	10	1 wingless
Pocket Beach	2011-05-10	2011	6	Entomobryidae	Collembola	2	20
Pocket Beach	2011-05-10	2011	6	Chrysididae	Hymenoptera	2	20
Pocket Beach	2011-05-10	2011	6	Aphididae	Hemiptera	1	10	1 wingless
Pocket Beach	2011-05-10	2011	6	Chironomidae	Diptera	1	10
Pocket Beach	2011-05-10	2011	6	Anthomyiidae	Diptera	1	10
Pocket Beach	2011-05-10	2011	6	Latridiidae	Coleoptera	1	10
Pocket Beach	2011-05-10	2011	7	Chironomidae	Diptera	8	80
Pocket Beach	2011-05-10	2011	7	Sminthuridae	Collembola	1	10
Riparian	2011-05-10	2011	1	Entomobryidae	Collembola	5	50
Riparian	2011-05-10	2011	1	Chironomidae	Diptera	1	10
Riparian	2011-05-10	2011	1	Acari	Acari	6	60
Riparian	2011-05-10	2011	1	Throscidae	Coleoptera	1	10
Riparian	2011-05-10	2011	1	Psocoptera	Psocoptera	2	20
Riparian	2011-05-10	2011	1	Sminthuridae	Collembola	1	10
Riparian	2011-05-10	2011	2	Thripidae	Thysanoptera	1	10
Riparian	2011-05-10	2011	2	Acari	Acari	2	20
Riparian	2011-05-10	2011	2	Entomobryidae	Collembola	4	40
Riparian	2011-05-10	2011	2	Psocoptera immature	Psocoptera	1	10
Riparian	2011-05-10	2011	2	Throscidae	Coleoptera	1	10
Riparian	2011-05-10	2011	3	Aphididae	Hemiptera	1	10	1 wingless
Riparian	2011-05-10	2011	3	Entomobryidae	Collembola	9	90
Riparian	2011-05-10	2011	3	Acari	Acari	6	60
Riparian	2011-05-10	2011	3	Hypogastruridae	Collembola	1	10
Riparian	2011-05-10	2011	3	Cecidomyiidae	Diptera	1	10
Riparian	2011-05-10	2011	3	Throscidae	Coleoptera	1	10
Riparian	2011-05-10	2011	3	Forficulidae	Dermaptera	1	10
Riparian	2011-05-10	2011	3	Sminthuridae	Collembola	1	10
Riparian	2011-05-10	2011	3	Anthomyiidae	Diptera	1	10
Riparian	2011-05-10	2011	3	Sepsidae	Diptera	1	10
Riparian	2011-05-10	2011	4	Psocoptera immature	Psocoptera	3	30
Riparian	2011-05-10	2011	4	Throscidae	Coleoptera	1	10
Riparian	2011-05-10	2011	4	Chironomidae	Diptera	4	40
Riparian	2011-05-10	2011	4	Acari	Acari	10	100
Riparian	2011-05-10	2011	4	Entomobryidae	Collembola	33	330
Riparian	2011-05-10	2011	5	Mymaridae	Hymenoptera	1	10
Riparian	2011-05-10	2011	5	Araneae	Arachnida	1	10
Riparian	2011-05-10	2011	5	Psychodidae	Diptera	3	30
Riparian	2011-05-10	2011	5	Hypogastruridae	Collembola	1	10
Riparian	2011-05-10	2011	5	Chironomidae	Diptera	3	30
Riparian	2011-05-10	2011	5	Aphididae	Hemiptera	1	10	1 wingless
Riparian	2011-05-10	2011	5	Sminthuridae	Collembola	1	10
Riparian	2011-05-10	2011	5	Acari	Acari	23	230
Riparian	2011-05-10	2011	5	Entomobryidae	Collembola	53	530
Riparian	2011-05-10	2011	6	no sample
Riparian	2011-05-10	2011	7	no sample
RipRap	2011-05-25	2011	1	Chironomidae	Diptera	2	20
RipRap	2011-05-25	2011	1	Ephydridae	Diptera	1	10
RipRap	2011-05-25	2011	2	Chironomidae	Diptera	2	20
RipRap	2011-05-25	2011	2	Psocoptera immature	Psocoptera	2	20
RipRap	2011-05-25	2011	2	Entomobryidae	Collembola	4	40
RipRap	2011-05-25	2011	2	Acari	Acari	2	20
RipRap	2011-05-25	2011	3	Ephydridae	Diptera	1	10
RipRap	2011-05-25	2011	3	Chironomidae	Diptera	1	10
RipRap	2011-05-25	2011	3	Dryomyzidae	Diptera	3	30
RipRap	2011-05-25	2011	3	Isotomidae	Collembola	3	30
RipRap	2011-05-25	2011	3	Dolichopodidae	Diptera	1	10
RipRap	2011-05-25	2011	4	Chironomidae	Diptera	4	40
RipRap	2011-05-25	2011	4	Isotomidae	Collembola	1	10
RipRap	2011-05-25	2011	4	Ephydridae	Diptera	1	10
RipRap	2011-05-25	2011	5	Ephydridae	Diptera	1	10
RipRap	2011-05-25	2011	5	Chironomidae	Diptera	4	40
RipRap	2011-05-25	2011	5	Ichneumonidae	Hymenoptera	1	10
RipRap	2011-05-25	2011	5	Canacidae	Diptera		0	saved #3
RipRap	2011-05-25	2011	6	Muscidae	Diptera	1	10
RipRap	2011-05-25	2011	6	Isotomidae	Collembola	5	50
RipRap	2011-05-25	2011	6	Chironomidae	Diptera	1	10
RipRap	2011-05-25	2011	6	Sphaeroceridae	Diptera	1	10
RipRap	2011-05-25	2011	7	Tipulidae	Diptera	2	20
RipRap	2011-05-25	2011	7	Acari	Acari	3	30
RipRap	2011-05-25	2011	7	Sciaridae	Diptera	1	10
RipRap	2011-05-25	2011	7	Isotomidae	Collembola	2	20
RipRap	2011-05-25	2011	7	Canacidae	Diptera	1	10
Pocket Beach	2011-05-25	2011	1	Chironomidae	Diptera	1	10
Pocket Beach	2011-05-25	2011	1	Sminthuridae	Collembola	1	10
Pocket Beach	2011-05-25	2011	2	Psocoptera immature	Psocoptera	2	20
Pocket Beach	2011-05-25	2011	2	Chironomidae	Diptera	3	30
Pocket Beach	2011-05-25	2011	2	Acari	Acari	6	60
Pocket Beach	2011-05-25	2011	2	Empididae	Diptera	1	10
Pocket Beach	2011-05-25	2011	2	Aphididae	Hemiptera	2	20	1 wingless 1 winged
Pocket Beach	2011-05-25	2011	2	Entomobryidae	Collembola	4	40
Pocket Beach	2011-05-25	2011	2	Scelionidae	Hymenoptera	1	10
Pocket Beach	2011-05-25	2011	3	Mymaridae	Hymenoptera	1	10
Pocket Beach	2011-05-25	2011	3	Araneae	Arachnida	1	10
Pocket Beach	2011-05-25	2011	3	Aphididae	Hemiptera	33	330	3 winged 30 wingless
Pocket Beach	2011-05-25	2011	3	Coleoptera larva	Coleoptera	1	10
Pocket Beach	2011-05-25	2011	3	Chironomidae	Diptera	1	10
Pocket Beach	2011-05-25	2011	3	Sminthuridae	Collembola	1	10
Pocket Beach	2011-05-25	2011	3	Entomobryidae	Collembola	1	10
Pocket Beach	2011-05-25	2011	4	Acari	Acari	2	20
Pocket Beach	2011-05-25	2011	4	Araneae	Arachnida	1	10
Pocket Beach	2011-05-25	2011	4	Psocoptera immature	Psocoptera	1	10
Pocket Beach	2011-05-25	2011	5	Acari	Acari	4	40
Pocket Beach	2011-05-25	2011	5	Tipulidae	Diptera	1	10
Pocket Beach	2011-05-25	2011	5	Chironomidae	Diptera	1	10
Pocket Beach	2011-05-25	2011	5	Entomobryidae	Collembola	2	20
Pocket Beach	2011-05-25	2011	5	Aphididae	Hemiptera	2	20	2 wingless
Pocket Beach	2011-05-25	2011	6	Chironomidae	Diptera	1	10
Pocket Beach	2011-05-25	2011	6	Entomobryidae	Collembola	2	20
Pocket Beach	2011-05-25	2011	6	Hypogastruridae	Collembola	1	10
Pocket Beach	2011-05-25	2011	6	Cicadellidae immature	Hemiptera	2	20
Pocket Beach	2011-05-25	2011	6	Psocoptera immature	Psocoptera	1	10
Pocket Beach	2011-05-25	2011	6	Mymaridae	Hymenoptera	1	10
Pocket Beach	2011-05-25	2011	7	Sciaridae	Diptera	1	10
Pocket Beach	2011-05-25	2011	7	Psocoptera immature	Psocoptera	4	40
Pocket Beach	2011-05-25	2011	7	Chironomidae	Diptera	5	50
Pocket Beach	2011-05-25	2011	7	Aphididae	Hemiptera	2	20	2 wingless
Pocket Beach	2011-05-25	2011	7	Acari	Acari	14	140
Pocket Beach	2011-05-25	2011	7	Entomobryidae	Collembola	13	130
Riparian	2011-05-25	2011	1	Hypogastruridae	Collembola	5	50
Riparian	2011-05-25	2011	1	Cecidomyiidae	Diptera	2	20
Riparian	2011-05-25	2011	1	Tipulidae	Diptera	1	10
Riparian	2011-05-25	2011	1	Staphylinidae	Coleoptera	1	10
Riparian	2011-05-25	2011	1	Chironomidae	Diptera	3	30
Riparian	2011-05-25	2011	1	Acari	Acari	4	40
Riparian	2011-05-25	2011	1	Entomobryidae	Collembola	3	30
Riparian	2011-05-25	2011	2	Cecidomyiidae	Diptera	1	10
Riparian	2011-05-25	2011	2	Hypogastruridae	Collembola	1	10
Riparian	2011-05-25	2011	2	Cercopidae immature	Hemiptera	1	10
Riparian	2011-05-25	2011	2	Chironomidae	Diptera	3	30
Riparian	2011-05-25	2011	2	Sminthuridae	Collembola	2	20
Riparian	2011-05-25	2011	2	Acari	Acari	1	10
Riparian	2011-05-25	2011	2	Entomobryidae	Collembola	2	20
Riparian	2011-05-25	2011	3	Cecidomyiidae	Diptera	1	10
Riparian	2011-05-25	2011	3	Pteromalidae	Hymenoptera	1	10
Riparian	2011-05-25	2011	3	Chironomidae	Diptera	14	140
Riparian	2011-05-25	2011	3	Aphididae	Hemiptera	1	10	1 wingless
Riparian	2011-05-25	2011	3	Sminthuridae	Collembola	1	10
Riparian	2011-05-25	2011	3	Acari	Acari	7	70
Riparian	2011-05-25	2011	3	Isotomidae	Collembola	2	20
Riparian	2011-05-25	2011	3	Entomobryidae	Collembola	5	50
Riparian	2011-05-25	2011	4	Hypogastruridae	Collembola	1	10
Riparian	2011-05-25	2011	4	Sminthuridae	Collembola	1	10
Riparian	2011-05-25	2011	4	Acari	Acari	3	30
Riparian	2011-05-25	2011	4	Isotomidae	Collembola	1	10
Riparian	2011-05-25	2011	4	Entomobryidae	Collembola	5	50
Riparian	2011-05-25	2011	5	Ichneumonidae	Hymenoptera	1	10
Riparian	2011-05-25	2011	5	Hypogastruridae	Collembola	2	20
Riparian	2011-05-25	2011	5	Araneae	Arachnida	1	10
Riparian	2011-05-25	2011	5	Aphididae	Hemiptera	1	10	1 wingless
Riparian	2011-05-25	2011	5	Acari	Acari	5	50
Riparian	2011-05-25	2011	5	Entomobryidae	Collembola	9	90
Riparian	2011-05-25	2011	6	Hypogastruridae	Collembola	1	10
Riparian	2011-05-25	2011	6	Cecidomyiidae	Diptera	1	10
Riparian	2011-05-25	2011	6	Aphididae	Hemiptera	1	10	1 winged
Riparian	2011-05-25	2011	6	Psocoptera immature	Psocoptera	1	10
Riparian	2011-05-25	2011	6	Lepidoptera	Lepidoptera	1	10
Riparian	2011-05-25	2011	6	Tipulidae	Diptera	1	10
Riparian	2011-05-25	2011	6	Chironomidae	Diptera	3	30
Riparian	2011-05-25	2011	6	Sminthuridae	Collembola	2	20
Riparian	2011-05-25	2011	6	Acari	Acari	1	10
Riparian	2011-05-25	2011	6	Entomobryidae	Collembola	17	170
Riparian	2011-05-25	2011	6	Hypogastruridae	Collembola	45	450
Riparian	2011-05-25	2011	7	Tipulidae	Diptera	1	10
Riparian	2011-05-25	2011	7	Psychodidae	Diptera	2	20
Riparian	2011-05-25	2011	7	Psocoptera	Psocoptera	2	20
Riparian	2011-05-25	2011	7	Ceratopogonidae	Diptera	1	10
Riparian	2011-05-25	2011	7	Chironomidae	Diptera	11	110
Riparian	2011-05-25	2011	7	Aphididae	Hemiptera	2	20	1 wingless
Riparian	2011-05-25	2011	7	Sminthuridae	Collembola	1	10
Riparian	2011-05-25	2011	7	Entomobryidae	Collembola	5	50
Riparian	2011-05-25	2011	7	Hypogastruridae	Collembola	2	20
Vegetation Swath	2011-05-25	2011	1	Cynipidae	Hymenoptera	1	10
Vegetation Swath	2011-05-25	2011	1	Thysanoptera immature	Thysanoptera	5	50
Vegetation Swath	2011-05-25	2011	1	Psyllidae immature	Hemiptera	1	10
Vegetation Swath	2011-05-25	2011	1	Cecidomyiidae	Diptera	2	20
Vegetation Swath	2011-05-25	2011	1	Hemiptera immature	Hemiptera	1	10
Vegetation Swath	2011-05-25	2011	1	Aphididae	Hemiptera	7	70	7 wingless
Vegetation Swath	2011-05-25	2011	1	Acari	Acari	1	10
Vegetation Swath	2011-05-25	2011	1	Isotomidae	Collembola	1	10
Vegetation Swath	2011-05-25	2011	1	Entomobryidae	Collembola	2	20
Vegetation Swath	2011-05-25	2011	1	Hypogastruridae	Collembola	40	400
Vegetation Swath	2011-05-25	2011	2	Symphyta larva	Hymenoptera	2	20
Vegetation Swath	2011-05-25	2011	2	Cecidomyiidae	Diptera	1	10
Vegetation Swath	2011-05-25	2011	2	Psyllidae immature	Hemiptera	2	20
Vegetation Swath	2011-05-25	2011	2	Psyllidae	Hemiptera	1	10
Vegetation Swath	2011-05-25	2011	2	Chironomidae	Diptera	2	20
Vegetation Swath	2011-05-25	2011	2	Aphididae	Hemiptera	1	10	1 wingless
Vegetation Swath	2011-05-25	2011	2	Sminthuridae	Collembola	1	10
Vegetation Swath	2011-05-25	2011	2	Hypogastruridae	Collembola	20	200
Vegetation Swath	2011-05-25	2011	3	Psyllidae immature	Hemiptera	8	80
Vegetation Swath	2011-05-25	2011	3	Psyllidae	Hemiptera	1	10
Vegetation Swath	2011-05-25	2011	3	Hemiptera immature	Hemiptera	1	10
Vegetation Swath	2011-05-25	2011	3	Psocoptera immature	Psocoptera	1	10
Vegetation Swath	2011-05-25	2011	3	Aphididae	Hemiptera	19	190	1 winged 18 wingless
Vegetation Swath	2011-05-25	2011	3	Muscidae	Diptera	2	20
Vegetation Swath	2011-05-25	2011	3	Chironomidae	Diptera	1	10
Vegetation Swath	2011-05-25	2011	3	Sminthuridae	Collembola	13	130
Vegetation Swath	2011-05-25	2011	3	Acari	Acari	4	40
Vegetation Swath	2011-05-25	2011	3	Isotomidae	Collembola	1	10
Vegetation Swath	2011-05-25	2011	3	Entomobryidae	Collembola	8	80
Vegetation Swath	2011-05-25	2011	3	Hypogastruridae	Collembola	1	10
Vegetation Swath	2011-05-25	2011	4	Thysanoptera immature	Thysanoptera	1	10
Vegetation Swath	2011-05-25	2011	4	Muscidae	Diptera	3	30
Vegetation Swath	2011-05-25	2011	4	Psyllidae	Hemiptera	4	40
Vegetation Swath	2011-05-25	2011	4	Aphididae	Hemiptera	1	10	1 wingless
Vegetation Swath	2011-05-25	2011	4	Sminthuridae	Collembola	1	10
Vegetation Swath	2011-05-25	2011	4	Entomobryidae	Collembola	1	10
Vegetation Swath	2011-05-25	2011	5	Psyllidae	Hemiptera	1	10
Vegetation Swath	2011-05-25	2011	5	Araneae	Arachnida	1	10
Vegetation Swath	2011-05-25	2011	5	Chironomidae	Diptera	1	10
Vegetation Swath	2011-05-25	2011	5	Aphididae	Hemiptera	4	40	4 wingless
Vegetation Swath	2011-05-25	2011	5	Sminthuridae	Collembola	6	60
Vegetation Swath	2011-05-25	2011	5	Entomobryidae	Collembola	11	110
Vegetation Swath	2011-05-25	2011	5	Hypogastruridae	Collembola	83	830
Vegetation Swath	2011-05-25	2011	6	Cecidomyiidae	Diptera	1	10
Vegetation Swath	2011-05-25	2011	6	Thysanoptera immature	Thysanoptera	1	10
Vegetation Swath	2011-05-25	2011	6	Psyllidae	Hemiptera	3	30
Vegetation Swath	2011-05-25	2011	6	Chironomidae	Diptera	1	10
Vegetation Swath	2011-05-25	2011	6	Sminthuridae	Collembola	97	970
Vegetation Swath	2011-05-25	2011	6	Acari	Acari	1	10
Vegetation Swath	2011-05-25	2011	6	Entomobryidae	Collembola	4	40
Vegetation Swath	2011-05-25	2011	6	Hypogastruridae	Collembola	8	80
Vegetation Swath	2011-05-25	2011	7	Tipulidae	Diptera	2	20
Vegetation Swath	2011-05-25	2011	7	Aphididae	Hemiptera	5	50	1 winged 4 wingless
Vegetation Swath	2011-05-25	2011	7	Sciaridae	Diptera	1	10
Vegetation Swath	2011-05-25	2011	7	Muscidae	Diptera	1	10
Vegetation Swath	2011-05-25	2011	7	Sminthuridae	Collembola	2	20
Vegetation Swath	2011-05-25	2011	7	Isotomidae	Collembola	1	10
Vegetation Swath	2011-05-25	2011	7	Entomobryidae	Collembola	5	50
Vegetation Swath	2011-05-25	2011	7	Hypogastruridae	Collembola	15	150
Seawall	2011-05-25	2011	1	Psocoptera immature	Psocoptera	1	10
Seawall	2011-05-25	2011	1	Chironomidae	Diptera	7	70
Seawall	2011-05-25	2011	1	Aphididae	Hemiptera	4	40	4 wingless
Seawall	2011-05-25	2011	1	Sminthuridae	Collembola	1	10
Seawall	2011-05-25	2011	1	Acari	Acari	3	30
Seawall	2011-05-25	2011	2	Chironomidae	Diptera	4	40
Seawall	2011-05-25	2011	2	Hypogastruridae	Collembola	1	10
Seawall	2011-05-25	2011	2	Aphididae	Hemiptera	1	10	1 wingless
Seawall	2011-05-25	2011	3	Sphaeroceridae	Diptera	1	10
Seawall	2011-05-25	2011	3	Chironomidae	Diptera	5	50
Seawall	2011-05-25	2011	3	Acari	Acari	1	10
Seawall	2011-05-25	2011	3	Entomobryidae	Collembola	1	10
Seawall	2011-05-25	2011	4	Psocoptera immature	Psocoptera	2	20
Seawall	2011-05-25	2011	4	Psyllidae	Hemiptera	1	10
Seawall	2011-05-25	2011	4	Chironomidae	Diptera	4	40
Seawall	2011-05-25	2011	4	Aphididae	Hemiptera	2	20	2 wingless
Seawall	2011-05-25	2011	4	Acari	Acari	2	20
Seawall	2011-05-25	2011	5	Chironomidae	Diptera	5	50
Seawall	2011-05-25	2011	5	Aphididae	Hemiptera	1	10	1 wingless
Seawall	2011-05-25	2011	5	Sminthuridae	Collembola	1	10
Seawall	2011-05-25	2011	5	Acari	Acari	1	10
Seawall	2011-05-25	2011	5	Hypogastruridae	Collembola	2	20
Seawall	2011-05-25	2011	6	Sternorrhyncha immature	Hemiptera	2	20
Seawall	2011-05-25	2011	6	Aphididae	Hemiptera	3	30	2 wingless 1 winged
Seawall	2011-05-25	2011	6	Psychodidae	Diptera	1	10
Seawall	2011-05-25	2011	6	Hypogastruridae	Collembola	4	40
Seawall	2011-05-25	2011	7	Aphididae	Hemiptera	3	30	3 winged
Seawall	2011-05-25	2011	7	Psychodidae	Diptera	1	10
Seawall	2011-05-25	2011	7	Sternorrhyncha immature	Hemiptera	1	10
Seawall	2011-05-25	2011	7	Hypogastruridae	Collembola	3	30
Seawall	2011-05-25	2011	7	Chironomidae	Diptera	1	10
RipRap	2011-06-08	2011	1	Acari	Acari	7	70
RipRap	2011-06-08	2011	1	Opomyzidae	Diptera	1	10
RipRap	2011-06-08	2011	2	Dryomyzidae	Diptera	2	20
RipRap	2011-06-08	2011	2	Chironomidae	Diptera	1	10
RipRap	2011-06-08	2011	3	Araneae	Arachnida	1	10
RipRap	2011-06-08	2011	3	Traskorchestia traskiana	Amphipoda	1	10
RipRap	2011-06-08	2011	3	Chironomidae	Diptera	6	60
RipRap	2011-06-08	2011	3	Isotomidae	Collembola	1	10
RipRap	2011-06-08	2011	3	Talitridae	Amphipoda	26	260
RipRap	2011-06-08	2011	4	Dolichopodidae	Diptera	2	20
RipRap	2011-06-08	2011	4	Chironomidae	Diptera	6	60
RipRap	2011-06-08	2011	4	Acari	Acari	2	20
RipRap	2011-06-08	2011	4	Hypogastruridae	Collembola	1	10
RipRap	2011-06-08	2011	5	Aphididae	Hemiptera	1	10	1 winged
RipRap	2011-06-08	2011	5	Formicidae	Hymenoptera	1	10
RipRap	2011-06-08	2011	5	Sphaeroceridae	Diptera	1	10
RipRap	2011-06-08	2011	5	Cecidomyiidae	Diptera	1	10
RipRap	2011-06-08	2011	5	Thysanoptera immature	Thysanoptera	1	10
RipRap	2011-06-08	2011	5	Chironomidae	Diptera	6	60
RipRap	2011-06-08	2011	5	Acari	Acari	2	20
RipRap	2011-06-08	2011	5	Hypogastruridae	Collembola	1	10
RipRap	2011-06-08	2011	6	Araneae	Arachnida	1	10
RipRap	2011-06-08	2011	6	Chironomidae	Diptera	3	30
RipRap	2011-06-08	2011	6	Cecidomyiidae	Diptera	1	10
RipRap	2011-06-08	2011	6	Acari	Acari	2	20
RipRap	2011-06-08	2011	7	Araneae	Arachnida	1	10
RipRap	2011-06-08	2011	7	Opomyzidae	Diptera	1	10
RipRap	2011-06-08	2011	7	Chironomidae	Diptera	4	40
RipRap	2011-06-08	2011	7	Acari	Acari	12	120
Seawall	2011-06-08	2011	1	Acari	Acari	1	10
Seawall	2011-06-08	2011	1	Sminthuridae	Collembola	3	30
Seawall	2011-06-08	2011	1	Chironomidae	Diptera	1	10
Seawall	2011-06-08	2011	2	Chironomidae	Diptera	2	20
Seawall	2011-06-08	2011	2	Miridae	Hemiptera	1	10
Seawall	2011-06-08	2011	2	Sphaeroceridae	Diptera	1	10
Seawall	2011-06-08	2011	2	Cecidomyiidae	Diptera	1	10
Seawall	2011-06-08	2011	3	Aphididae	Hemiptera	1	10	1 wingless
Seawall	2011-06-08	2011	4	Chironomidae	Diptera	3	30
Seawall	2011-06-08	2011	4	Psychodidae	Diptera	1	10
Seawall	2011-06-08	2011	5	Tipulidae	Diptera	1	10
Seawall	2011-06-08	2011	5	Chironomidae	Diptera	2	20
Seawall	2011-06-08	2011	5	Sternorrhyncha immature	Hemiptera	1	10
Seawall	2011-06-08	2011	6	Chironomidae	Diptera	3	30
Seawall	2011-06-08	2011	6	Cecidomyiidae	Diptera	1	10
Seawall	2011-06-08	2011	7	Cecidomyiidae	Diptera	1	10
Seawall	2011-06-08	2011	7	Acari	Acari	4	40
Vegetation Swath	2011-06-08	2011	1	Psocoptera	Psocoptera	1	10
Vegetation Swath	2011-06-08	2011	1	Aphididae	Hemiptera	13	130	10 wingless 3 winged
Vegetation Swath	2011-06-08	2011	1	Entomobryidae	Collembola	5	50
Vegetation Swath	2011-06-08	2011	1	Cecidomyiidae	Diptera	1	10
Vegetation Swath	2011-06-08	2011	1	Mymaridae	Hymenoptera	1	10
Vegetation Swath	2011-06-08	2011	1	Staphylinidae	Coleoptera	1	10
Vegetation Swath	2011-06-08	2011	1	Chironomidae	Diptera	2	20
Vegetation Swath	2011-06-08	2011	1	Acari	Acari	3	30
Vegetation Swath	2011-06-08	2011	2	Mymaridae	Hymenoptera	1	10
Vegetation Swath	2011-06-08	2011	2	Cercopidae	Hemiptera	2	20
Vegetation Swath	2011-06-08	2011	2	Gastropoda slug	Gastropoda	1	10
Vegetation Swath	2011-06-08	2011	2	Cecidomyiidae	Diptera	3	30
Vegetation Swath	2011-06-08	2011	2	Aphididae	Hemiptera	10	100	9 wingless 1 winged
Vegetation Swath	2011-06-08	2011	2	Sminthuridae	Collembola	1	10
Vegetation Swath	2011-06-08	2011	2	Entomobryidae	Collembola	2	20
Vegetation Swath	2011-06-08	2011	3	Carabidae	Coleoptera	1	10
Vegetation Swath	2011-06-08	2011	3	Symphyta larva	Hymenoptera	1	10
Vegetation Swath	2011-06-08	2011	3	Psyllidae	Hemiptera	4	40
Vegetation Swath	2011-06-08	2011	3	Aphididae	Hemiptera	8	80	6 wingless 2 winged
Vegetation Swath	2011-06-08	2011	3	Muscidae	Diptera	2	20
Vegetation Swath	2011-06-08	2011	3	Calliphoridae	Diptera	1	10
Vegetation Swath	2011-06-08	2011	3	Anthomyiidae	Diptera	1	10
Vegetation Swath	2011-06-08	2011	3	Gastropoda slug	Gastropoda	1	10
Vegetation Swath	2011-06-08	2011	3	Sciaridae	Diptera	1	10
Vegetation Swath	2011-06-08	2011	3	Chironomidae	Diptera	1	10
Vegetation Swath	2011-06-08	2011	3	Entomobryidae	Collembola	2	20
Vegetation Swath	2011-06-08	2011	3	Hypogastruridae	Collembola	3	30
Vegetation Swath	2011-06-08	2011	4	Symphyta larva	Hymenoptera	1	10
Vegetation Swath	2011-06-08	2011	4	Aphididae	Hemiptera	10	100	7 wingless 3 winged
Vegetation Swath	2011-06-08	2011	4	Muscidae	Diptera	3	30
Vegetation Swath	2011-06-08	2011	4	Sciaridae	Diptera	2	20
Vegetation Swath	2011-06-08	2011	4	Cicadellidae	Hemiptera	2	20
Vegetation Swath	2011-06-08	2011	4	Mymaridae	Hymenoptera	1	10
Vegetation Swath	2011-06-08	2011	4	Sminthuridae	Collembola	9	90
Vegetation Swath	2011-06-08	2011	4	Acari	Acari	3	30
Vegetation Swath	2011-06-08	2011	4	Entomobryidae	Collembola	2	20
Vegetation Swath	2011-06-08	2011	4	Hypogastruridae	Collembola	1	10
Vegetation Swath	2011-06-08	2011	5	no sample
Vegetation Swath	2011-06-08	2011	6	Aphididae	Hemiptera	5	50	4 wingless 1 winged
Vegetation Swath	2011-06-08	2011	6	Sciaridae	Diptera	2	20
Vegetation Swath	2011-06-08	2011	6	Araneae	Arachnida	1	10
Vegetation Swath	2011-06-08	2011	6	Cicadellidae immature	Hemiptera	1	10
Vegetation Swath	2011-06-08	2011	6	Staphylinidae	Coleoptera	1	10
Vegetation Swath	2011-06-08	2011	6	Cecidomyiidae	Diptera	1	10
Vegetation Swath	2011-06-08	2011	6	Anthomyiidae	Diptera	1	10
Vegetation Swath	2011-06-08	2011	6	Syrphidae larva	Diptera	1	10
Vegetation Swath	2011-06-08	2011	6	Chironomidae	Diptera	2	20
Vegetation Swath	2011-06-08	2011	6	Sminthuridae	Collembola	43	430
Vegetation Swath	2011-06-08	2011	6	Acari	Acari	3	30
Vegetation Swath	2011-06-08	2011	6	Entomobryidae	Collembola	8	80
Vegetation Swath	2011-06-08	2011	6	Hypogastruridae	Collembola	6	60
Vegetation Swath	2011-06-08	2011	7	Aphididae	Hemiptera	17	170	7 wingless 10 winged
Vegetation Swath	2011-06-08	2011	7	Muscidae	Diptera	6	60
Vegetation Swath	2011-06-08	2011	7	Miridae	Hemiptera	1	10
Vegetation Swath	2011-06-08	2011	7	Sciaridae	Diptera	1	10
Vegetation Swath	2011-06-08	2011	7	Psyllidae immature	Hemiptera	1	10
Vegetation Swath	2011-06-08	2011	7	Psyllidae	Hemiptera	1	10
Vegetation Swath	2011-06-08	2011	7	Coccinellidae	Coleoptera	1	10
Vegetation Swath	2011-06-08	2011	7	Sminthuridae	Collembola	57	570
Vegetation Swath	2011-06-08	2011	7	Acari	Acari	1	10
Vegetation Swath	2011-06-08	2011	7	Entomobryidae	Collembola	2	20
Pocket Beach	2011-06-08	2011	1	Muscidae	Diptera	1	10
Pocket Beach	2011-06-08	2011	1	Cynipidae	Hymenoptera	1	10
Pocket Beach	2011-06-08	2011	1	Thysanoptera immature	Thysanoptera	1	10
Pocket Beach	2011-06-08	2011	1	Mordellidae	Coleoptera	1	10	saved #4
Pocket Beach	2011-06-08	2011	1	Sphecidae	Hymenoptera	1	10
Pocket Beach	2011-06-08	2011	1	Tipulidae	Diptera	1	10
Pocket Beach	2011-06-08	2011	1	Ceratopogonidae	Diptera	1	10
Pocket Beach	2011-06-08	2011	1	Aphididae	Hemiptera	2	20	2 wingless
Pocket Beach	2011-06-08	2011	1	Sminthuridae	Collembola	1	10
Pocket Beach	2011-06-08	2011	2	Aphididae	Hemiptera	11	110	10 wingless 1 winged
Pocket Beach	2011-06-08	2011	2	Cecidomyiidae	Diptera	2	20
Pocket Beach	2011-06-08	2011	2	Coccinellidae	Coleoptera	1	10
Pocket Beach	2011-06-08	2011	2	Calliphoridae	Diptera	2	20
Pocket Beach	2011-06-08	2011	2	Throscidae	Coleoptera	2	20
Pocket Beach	2011-06-08	2011	2	Cercopidae	Hemiptera	1	10
Pocket Beach	2011-06-08	2011	2	Entomobryidae	Collembola	2	20
Pocket Beach	2011-06-08	2011	3	Aphididae	Hemiptera	2	20	1 wingless 1 winged
Pocket Beach	2011-06-08	2011	3	Mymaridae	Hymenoptera	1	10
Pocket Beach	2011-06-08	2011	3	Muscidae	Diptera	1	10
Pocket Beach	2011-06-08	2011	3	Cecidomyiidae	Diptera	2	20
Pocket Beach	2011-06-08	2011	3	Acari	Acari	5	50
Pocket Beach	2011-06-08	2011	3	Entomobryidae	Collembola	1	10
Pocket Beach	2011-06-08	2011	4	Lepidoptera	Lepidoptera	1	10
Pocket Beach	2011-06-08	2011	4	Entomobryidae	Collembola	1	10
Pocket Beach	2011-06-08	2011	4	Throscidae	Coleoptera	1	10
Pocket Beach	2011-06-08	2011	4	Thripidae	Thysanoptera	1	10
Pocket Beach	2011-06-08	2011	4	Cecidomyiidae	Diptera	1	10
Pocket Beach	2011-06-08	2011	4	Ichneumonidae	Hymenoptera	1	10
Pocket Beach	2011-06-08	2011	4	Cicadellidae immature	Hemiptera	1	10
Pocket Beach	2011-06-08	2011	4	Psychodidae	Diptera	1	10
Pocket Beach	2011-06-08	2011	4	Psocoptera	Psocoptera	1	10
Pocket Beach	2011-06-08	2011	4	Aphididae	Hemiptera	4	40	4 wingless
Pocket Beach	2011-06-08	2011	4	Sminthuridae	Collembola	5	50
Pocket Beach	2011-06-08	2011	4	Acari	Acari	3	30
Pocket Beach	2011-06-08	2011	4	Entomobryidae	Collembola	6	60
Pocket Beach	2011-06-08	2011	5	Psocoptera	Psocoptera	2	20
Pocket Beach	2011-06-08	2011	5	Nitidulidae	Coleoptera	1	10
Pocket Beach	2011-06-08	2011	5	Aphididae	Hemiptera	5	50	4 wingless 1 winged
Pocket Beach	2011-06-08	2011	5	Sciaridae	Diptera	1	10
Pocket Beach	2011-06-08	2011	5	Cicadellidae immature	Hemiptera	1	10
Pocket Beach	2011-06-08	2011	5	Sminthuridae	Collembola	1	10
Pocket Beach	2011-06-08	2011	5	Acari	Acari	11	110
Pocket Beach	2011-06-08	2011	5	Entomobryidae	Collembola	6	60
Pocket Beach	2011-06-08	2011	6	Calliphoridae	Diptera	2	20
Pocket Beach	2011-06-08	2011	6	Muscidae	Diptera	1	10
Pocket Beach	2011-06-08	2011	6	Aphididae	Hemiptera	2	20	1 wingless 1 winged
Pocket Beach	2011-06-08	2011	6	Throscidae	Coleoptera	1	10
Pocket Beach	2011-06-08	2011	6	Chloropidae	Diptera	1	10
Pocket Beach	2011-06-08	2011	6	Sminthuridae	Collembola	1	10
Pocket Beach	2011-06-08	2011	6	Acari	Acari	1	10
Pocket Beach	2011-06-08	2011	6	Entomobryidae	Collembola	3	30
Pocket Beach	2011-06-08	2011	7	Cicadellidae	Hemiptera	2	20
Pocket Beach	2011-06-08	2011	7	Cicadellidae immature	Hemiptera	1	10
Pocket Beach	2011-06-08	2011	7	Araneae	Arachnida	1	10
Pocket Beach	2011-06-08	2011	7	Sciaridae	Diptera	1	10
Pocket Beach	2011-06-08	2011	7	Psocoptera	Psocoptera	1	10
Pocket Beach	2011-06-08	2011	7	Signiphoridae	Hymenoptera	1	10
Pocket Beach	2011-06-08	2011	7	Chironomidae	Diptera	2	20
Pocket Beach	2011-06-08	2011	7	Aphididae	Hemiptera	1	10	1 wingless
Pocket Beach	2011-06-08	2011	7	Sminthuridae	Collembola	3	30
Pocket Beach	2011-06-08	2011	7	Acari	Acari	1	10
Pocket Beach	2011-06-08	2011	7	Entomobryidae	Collembola	5	50
Riparian	2011-06-08	2011	1	Psocoptera immature	Psocoptera	1	10
Riparian	2011-06-08	2011	1	Aphididae	Hemiptera	3	30	3 wingless
Riparian	2011-06-08	2011	1	Sminthuridae	Collembola	1	10
Riparian	2011-06-08	2011	1	Acari	Acari	10	100
Riparian	2011-06-08	2011	1	Entomobryidae	Collembola	8	80
Riparian	2011-06-08	2011	1	Hypogastruridae	Collembola	3	30
Riparian	2011-06-08	2011	2	Symphyta larva	Hymenoptera	1	10
Riparian	2011-06-08	2011	2	Cecidomyiidae larva	Diptera	2	20
Riparian	2011-06-08	2011	2	Psocoptera	Psocoptera	1	10
Riparian	2011-06-08	2011	2	Aphididae	Hemiptera	7	70	6 wingless 1 winged
Riparian	2011-06-08	2011	2	Araneae	Arachnida	2	20
Riparian	2011-06-08	2011	2	Cicadellidae immature	Hemiptera	1	10
Riparian	2011-06-08	2011	2	Miridae immature	Hemiptera	1	10
Riparian	2011-06-08	2011	2	Acari	Acari	13	130
Riparian	2011-06-08	2011	2	Entomobryidae	Collembola	14	140
Riparian	2011-06-08	2011	2	Hypogastruridae	Collembola	1	10
Riparian	2011-06-08	2011	3	Lepidoptera	Lepidoptera	1	10
Riparian	2011-06-08	2011	3	Psocoptera immature	Psocoptera	6	60
Riparian	2011-06-08	2011	3	Cecidomyiidae	Diptera	1	10
Riparian	2011-06-08	2011	3	Cicadellidae immature	Hemiptera	1	10
Riparian	2011-06-08	2011	3	Araneae	Arachnida	1	10
Riparian	2011-06-08	2011	3	Chironomidae	Diptera	1	10
Riparian	2011-06-08	2011	3	Aphididae	Hemiptera	2	20	2 wingless
Riparian	2011-06-08	2011	3	Acari	Acari	11	110
Riparian	2011-06-08	2011	3	Entomobryidae	Collembola	13	130
Riparian	2011-06-08	2011	3	Hypogastruridae	Collembola	1	10
Riparian	2011-06-08	2011	4	Araneae	Arachnida	1	10
Riparian	2011-06-08	2011	4	Sphaeroceridae	Diptera	1	10
Riparian	2011-06-08	2011	4	Thripidae	Thysanoptera	1	10
Riparian	2011-06-08	2011	4	Cecidomyiidae	Diptera	1	10
Riparian	2011-06-08	2011	4	Thysanoptera immature	Thysanoptera	1	10
Riparian	2011-06-08	2011	4	Aphididae	Hemiptera	9	90	9 wingless
Riparian	2011-06-08	2011	4	Acari	Acari	5	50
Riparian	2011-06-08	2011	4	Entomobryidae	Collembola	3	30
Riparian	2011-06-08	2011	5	Staphylinidae	Coleoptera	2	20
Riparian	2011-06-08	2011	5	Cicadellidae immature	Hemiptera	1	10
Riparian	2011-06-08	2011	5	Hemerobiidae larva	Neuroptera	1	10
Riparian	2011-06-08	2011	5	Lepidoptera larva	Lepidoptera	1	10
Riparian	2011-06-08	2011	5	Sciomyzidae	Diptera	1	10
Riparian	2011-06-08	2011	5	Entomobryidae	Collembola	4	40
Riparian	2011-06-08	2011	5	Acari	Acari	4	40
Riparian	2011-06-08	2011	6	no sample
Riparian	2011-06-08	2011	7	no sample
Seawall	2011-06-21	2011	1	Chironomidae	Diptera	5	50
Seawall	2011-06-21	2011	1	Cecidomyiidae	Diptera	2	20
Seawall	2011-06-21	2011	1	Sciaridae	Diptera	1	10
Seawall	2011-06-21	2011	1	Aphididae	Hemiptera	1	10	1 wingless
Seawall	2011-06-21	2011	1	Acari	Acari	4	40
Seawall	2011-06-21	2011	2	Aphididae	Hemiptera	1	10	1 winged
Seawall	2011-06-21	2011	2	Chironomidae	Diptera	2	20
Seawall	2011-06-21	2011	2	Acari	Acari	4	40
Seawall	2011-06-21	2011	3	Psychodidae	Diptera	1	10
Seawall	2011-06-21	2011	3	Chironomidae	Diptera	2	20
Seawall	2011-06-21	2011	3	Entomobryidae	Collembola	3	30
Seawall	2011-06-21	2011	3	Cecidomyiidae	Diptera	1	10
Seawall	2011-06-21	2011	3	Araneae	Arachnida	1	10
Seawall	2011-06-21	2011	4	Thripidae	Thysanoptera	1	10
Seawall	2011-06-21	2011	4	Chironomidae	Diptera	2	20
Seawall	2011-06-21	2011	4	Psychodidae	Diptera	1	10
Seawall	2011-06-21	2011	4	Sminthuridae	Collembola	1	10
Seawall	2011-06-21	2011	5	Cecidomyiidae	Diptera	2	20
Seawall	2011-06-21	2011	5	Sciaridae	Diptera	1	10
Seawall	2011-06-21	2011	5	Aphididae	Hemiptera	1	10	1 winged
Seawall	2011-06-21	2011	5	Chironomidae	Diptera	1	10
Seawall	2011-06-21	2011	5	Psychodidae	Diptera	1	10
Seawall	2011-06-21	2011	6	Entomobryidae	Collembola	1	10
Seawall	2011-06-21	2011	6	Aphididae	Hemiptera	1	10	1 winged
Seawall	2011-06-21	2011	7	Thripidae	Thysanoptera	1	10
Seawall	2011-06-21	2011	7	Psychodidae	Diptera	1	10
Pocket Beach	2011-06-21	2011	1	Psocoptera immature	Psocoptera	3	30
Pocket Beach	2011-06-21	2011	1	Ichneumonidae	Hymenoptera	1	10	saved #5, wingless
Pocket Beach	2011-06-21	2011	1	Cecidomyiidae	Diptera	2	20
Pocket Beach	2011-06-21	2011	1	Latridiidae	Coleoptera	1	10
Pocket Beach	2011-06-21	2011	1	Delphacidae immature	Hemiptera	1	10
Pocket Beach	2011-06-21	2011	1	Araneae	Arachnida	1	10
Pocket Beach	2011-06-21	2011	1	Braconidae	Hymenoptera	1	10
Pocket Beach	2011-06-21	2011	1	Chironomidae	Diptera	2	20
Pocket Beach	2011-06-21	2011	1	Aphididae	Hemiptera	3	30	3 wingless
Pocket Beach	2011-06-21	2011	1	Sminthuridae	Collembola	2	20
Pocket Beach	2011-06-21	2011	1	Acari	Acari	64	640
Pocket Beach	2011-06-21	2011	1	Isotomidae	Collembola	4	40
Pocket Beach	2011-06-21	2011	1	Entomobryidae	Collembola	50	500
Pocket Beach	2011-06-21	2011	1	Hypogastruridae	Collembola	1	10
Pocket Beach	2011-06-21	2011	2	Thysanoptera immature	Thysanoptera	1	10
Pocket Beach	2011-06-21	2011	2	Cercopidae	Hemiptera	1	10
Pocket Beach	2011-06-21	2011	2	Araneae	Arachnida	1	10
Pocket Beach	2011-06-21	2011	2	Cecidomyiidae	Diptera	1	10
Pocket Beach	2011-06-21	2011	2	Aphididae	Hemiptera	8	80	8 wingless
Pocket Beach	2011-06-21	2011	2	Agaonidae	Hymenoptera	1	10
Pocket Beach	2011-06-21	2011	2	Miridae immature	Hemiptera	1	10
Pocket Beach	2011-06-21	2011	2	Acari	Acari	1	10
Pocket Beach	2011-06-21	2011	2	Chironomidae	Diptera	2	20
Pocket Beach	2011-06-21	2011	2	Isotomidae	Collembola	1	10
Pocket Beach	2011-06-21	2011	2	Entomobryidae	Collembola	1	10
Pocket Beach	2011-06-21	2011	3	Cecidomyiidae	Diptera	4	40
Pocket Beach	2011-06-21	2011	3	Hemerobiidae larva	Neuroptera	3	30
Pocket Beach	2011-06-21	2011	3	Aphididae	Hemiptera	2	20	2 wingless
Pocket Beach	2011-06-21	2011	3	Thripidae	Thysanoptera	5	50
Pocket Beach	2011-06-21	2011	3	Phoridae	Diptera	1	10
Pocket Beach	2011-06-21	2011	3	Anthomyiidae	Diptera	1	10
Pocket Beach	2011-06-21	2011	3	Chironomidae	Diptera	2	20
Pocket Beach	2011-06-21	2011	3	Aphididae	Hemiptera	14	140	14 wingless
Pocket Beach	2011-06-21	2011	3	Acari	Acari	2	20
Pocket Beach	2011-06-21	2011	3	Isotomidae	Collembola	1	10
Pocket Beach	2011-06-21	2011	3	Entomobryidae	Collembola	11	110
Pocket Beach	2011-06-21	2011	4	Mordellidae	Coleoptera	3	30
Pocket Beach	2011-06-21	2011	4	Throscidae	Coleoptera	1	10
Pocket Beach	2011-06-21	2011	4	Cercopidae	Hemiptera	3	30
Pocket Beach	2011-06-21	2011	4	Miridae immature	Hemiptera	1	10
Pocket Beach	2011-06-21	2011	4	Cecidomyiidae	Diptera	1	10
Pocket Beach	2011-06-21	2011	4	Empididae	Diptera	1	10
Pocket Beach	2011-06-21	2011	4	Lepidoptera larva	Lepidoptera	1	10
Pocket Beach	2011-06-21	2011	4	Forficulidae	Dermaptera	2	20
Pocket Beach	2011-06-21	2011	4	Aphelinidae	Hymenoptera	1	10
Pocket Beach	2011-06-21	2011	4	Aphididae	Hemiptera	2	20	2 wingless
Pocket Beach	2011-06-21	2011	4	Acari	Acari	7	70
Pocket Beach	2011-06-21	2011	4	Entomobryidae	Collembola	15	150
Pocket Beach	2011-06-21	2011	5	Cercopidae	Hemiptera	1	10
Pocket Beach	2011-06-21	2011	5	Cecidomyiidae	Diptera	2	20
Pocket Beach	2011-06-21	2011	5	Mordellidae	Coleoptera	1	10
Pocket Beach	2011-06-21	2011	5	Ichneumonidae	Hymenoptera	1	10
Pocket Beach	2011-06-21	2011	5	Bostrichidae	Coleoptera	1	10
Pocket Beach	2011-06-21	2011	5	Chironomidae	Diptera	1	10
Pocket Beach	2011-06-21	2011	5	Acari	Acari	1	10
Pocket Beach	2011-06-21	2011	5	Entomobryidae	Collembola	1	10
Pocket Beach	2011-06-21	2011	6	Psychodidae	Diptera	1	10
Pocket Beach	2011-06-21	2011	6	Aphididae	Hemiptera	1	10	1 winged
Pocket Beach	2011-06-21	2011	6	Chironomidae	Diptera	1	10
Pocket Beach	2011-06-21	2011	6	Mordellidae	Coleoptera	3	30
Pocket Beach	2011-06-21	2011	6	Lygaeidae	Hemiptera	1	10
Pocket Beach	2011-06-21	2011	7	Sciaridae	Diptera	1	10
Pocket Beach	2011-06-21	2011	7	Mymaridae	Hymenoptera	1	10
Pocket Beach	2011-06-21	2011	7	Chironomidae	Diptera	1	10
Pocket Beach	2011-06-21	2011	7	Aphididae	Hemiptera	3	30	3 wingless
Pocket Beach	2011-06-21	2011	7	Acari	Acari	26	260
Pocket Beach	2011-06-21	2011	7	Entomobryidae	Collembola	18	180
Riparian	2011-06-21	2011	1	Chironomidae	Diptera	2	20
Riparian	2011-06-21	2011	1	Aphididae	Hemiptera	1	10	1 wingless
Riparian	2011-06-21	2011	1	Sminthuridae	Collembola	2	20
Riparian	2011-06-21	2011	1	Acari	Acari	6	60
Riparian	2011-06-21	2011	1	Entomobryidae	Collembola	4	40
Riparian	2011-06-21	2011	2	Throscidae	Coleoptera	2	20
Riparian	2011-06-21	2011	2	Mycetophilidae	Diptera	1	10
Riparian	2011-06-21	2011	2	Hemerobiidae larva	Neuroptera	1	10
Riparian	2011-06-21	2011	2	Cecidomyiidae	Diptera	1	10
Riparian	2011-06-21	2011	2	Empididae	Diptera	1	10
Riparian	2011-06-21	2011	2	Chironomidae	Diptera	3	30
Riparian	2011-06-21	2011	2	Aphididae	Hemiptera	2	20	2 wingless
Riparian	2011-06-21	2011	2	Acari	Acari	21	210
Riparian	2011-06-21	2011	2	Entomobryidae	Collembola	8	80
Riparian	2011-06-21	2011	3	Throscidae	Coleoptera	1	10
Riparian	2011-06-21	2011	3	Cecidomyiidae	Diptera	1	10
Riparian	2011-06-21	2011	3	Cercopidae	Hemiptera	1	10
Riparian	2011-06-21	2011	3	Lepidoptera	Lepidoptera	2	20
Riparian	2011-06-21	2011	3	Sciaridae	Diptera	2	20
Riparian	2011-06-21	2011	3	Chironomidae	Diptera	2	20
Riparian	2011-06-21	2011	3	Aphididae	Hemiptera	10	100	10 wingless
Riparian	2011-06-21	2011	3	Sternorrhyncha immature	Hemiptera	2	20
Riparian	2011-06-21	2011	3	Acari	Acari	12	120
Riparian	2011-06-21	2011	3	Entomobryidae	Collembola	13	130
Riparian	2011-06-21	2011	4	Anthomyiidae	Diptera	2	20
Riparian	2011-06-21	2011	4	Cecidomyiidae	Diptera	1	10
Riparian	2011-06-21	2011	4	Phoridae	Diptera	1	10
Riparian	2011-06-21	2011	4	Throscidae	Coleoptera	1	10
Riparian	2011-06-21	2011	4	Psocoptera	Psocoptera	1	10
Riparian	2011-06-21	2011	4	Cicadellidae immature	Hemiptera	1	10
Riparian	2011-06-21	2011	4	Sternorrhyncha immature	Hemiptera	1	10
Riparian	2011-06-21	2011	4	Chironomidae	Diptera	1	10
Riparian	2011-06-21	2011	4	Aphididae	Hemiptera	8	80	8 wingless
Riparian	2011-06-21	2011	4	Acari	Acari	3	30
Riparian	2011-06-21	2011	4	Entomobryidae	Collembola	7	70
Riparian	2011-06-21	2011	5	Gastropoda slug	Gastropoda	1	10
Riparian	2011-06-21	2011	5	Hydrophilidae	Coleoptera	1	10
Riparian	2011-06-21	2011	5	Lepidoptera	Lepidoptera	1	10
Riparian	2011-06-21	2011	5	Scelionidae	Hymenoptera	1	10
Riparian	2011-06-21	2011	5	Thripidae	Thysanoptera	1	10
Riparian	2011-06-21	2011	5	Araneae	Arachnida	1	10
Riparian	2011-06-21	2011	5	Cecidomyiidae	Diptera	1	10
Riparian	2011-06-21	2011	5	Torymidae	Hymenoptera	3	30
Riparian	2011-06-21	2011	5	Chironomidae	Diptera	2	20
Riparian	2011-06-21	2011	5	Aphididae	Hemiptera	6	60	6 wingless
Riparian	2011-06-21	2011	5	Sminthuridae	Collembola	1	10
Riparian	2011-06-21	2011	5	Acari	Acari	2	20
Riparian	2011-06-21	2011	5	Entomobryidae	Collembola	12	120
Riparian	2011-06-21	2011	6	Araneae	Arachnida	1	10
Riparian	2011-06-21	2011	6	Sciaridae	Diptera	1	10
Riparian	2011-06-21	2011	6	Psocoptera immature	Psocoptera	1	10
Riparian	2011-06-21	2011	6	Cercopidae	Hemiptera	1	10
Riparian	2011-06-21	2011	6	Thysanoptera immature	Thysanoptera	1	10
Riparian	2011-06-21	2011	6	Hypogastruridae	Collembola	1	10
Riparian	2011-06-21	2011	6	Cecidomyiidae	Diptera	1	10
Riparian	2011-06-21	2011	6	Encyrtidae	Hymenoptera	1	10
Riparian	2011-06-21	2011	6	Chironomidae	Diptera	7	70
Riparian	2011-06-21	2011	6	Aphididae	Hemiptera	1	10	1 wingless
Riparian	2011-06-21	2011	6	Acari	Acari	8	80
Riparian	2011-06-21	2011	6	Entomobryidae	Collembola	24	240
Riparian	2011-06-21	2011	7	Sciaridae	Diptera	1	10
Riparian	2011-06-21	2011	7	Mymaridae	Hymenoptera	1	10
Riparian	2011-06-21	2011	7	Megaspilidae	Hymenoptera	1	10
Riparian	2011-06-21	2011	7	Aphididae	Hemiptera	2	20	2 wingless
Riparian	2011-06-21	2011	7	Sminthuridae	Collembola	2	20
Riparian	2011-06-21	2011	7	Acari	Acari	10	100
Riparian	2011-06-21	2011	7	Isotomidae	Collembola	2	20
Riparian	2011-06-21	2011	7	Entomobryidae	Collembola	18	180
Riparian	2011-06-21	2011	7	Hypogastruridae	Collembola	12	120
RipRap	2011-06-21	2011	1	Anthomyzidae	Diptera	4	40
RipRap	2011-06-21	2011	1	Acari	Acari	1	10
RipRap	2011-06-21	2011	1	Chironomidae	Diptera	4	40
RipRap	2011-06-21	2011	1	Entomobryidae	Collembola	2	20
RipRap	2011-06-21	2011	1	Hypogastruridae	Collembola	1	10
RipRap	2011-06-21	2011	1	Calliphoridae	Diptera	1	10
RipRap	2011-06-21	2011	2	Anthomyzidae	Diptera	2	20
RipRap	2011-06-21	2011	2	Acari	Acari	5	50
RipRap	2011-06-21	2011	2	Calliphoridae	Diptera	1	10
RipRap	2011-06-21	2011	3	Araneae	Arachnida	1	10
RipRap	2011-06-21	2011	3	Chironomidae	Diptera	3	30
RipRap	2011-06-21	2011	3	Anthomyzidae	Diptera	2	20
RipRap	2011-06-21	2011	3	Entomobryidae	Collembola	2	20
RipRap	2011-06-21	2011	4	Staphylinidae	Coleoptera	1	10
RipRap	2011-06-21	2011	4	Chironomidae	Diptera	1	10
RipRap	2011-06-21	2011	4	Entomobryidae	Collembola	1	10
RipRap	2011-06-21	2011	5	Sciaridae	Diptera	1	10
RipRap	2011-06-21	2011	5	Chrysididae	Hymenoptera	1	10
RipRap	2011-06-21	2011	5	Trichoptera	Trichoptera	1	10
RipRap	2011-06-21	2011	6	Acari	Acari	4	40
RipRap	2011-06-21	2011	6	Ephydridae	Diptera	1	10
RipRap	2011-06-21	2011	6	Chironomidae	Diptera	3	30
RipRap	2011-06-21	2011	6	Scelionidae	Hymenoptera	1	10
RipRap	2011-06-21	2011	6	Entomobryidae	Collembola	2	20
RipRap	2011-06-21	2011	7	Chironomidae	Diptera	6	60
RipRap	2011-06-21	2011	7	Acari	Acari	4	40
RipRap	2011-06-21	2011	7	Anthomyzidae	Diptera	1	10
Vegetation Swath	2011-06-21	2011	1	Muscidae	Diptera	1	10
Vegetation Swath	2011-06-21	2011	1	Staphylinidae	Coleoptera	1	10
Vegetation Swath	2011-06-21	2011	1	Aphididae	Hemiptera	96	960	96 wingless
Vegetation Swath	2011-06-21	2011	1	Mymaridae	Hymenoptera	1	10
Vegetation Swath	2011-06-21	2011	1	Psyllidae	Hemiptera	1	10
Vegetation Swath	2011-06-21	2011	1	Thripidae	Thysanoptera	2	20
Vegetation Swath	2011-06-21	2011	1	Thysanoptera immature	Thysanoptera	1	10
Vegetation Swath	2011-06-21	2011	1	Ichneumonidae	Hymenoptera	3	30
Vegetation Swath	2011-06-21	2011	1	Pteromalidae	Hymenoptera	1	10
Vegetation Swath	2011-06-21	2011	1	Chironomidae	Diptera	2	20
Vegetation Swath	2011-06-21	2011	1	Entomobryidae	Collembola	4	40
Vegetation Swath	2011-06-21	2011	2	Aphididae	Hemiptera	16	160	16 wingless
Vegetation Swath	2011-06-21	2011	2	Hemiptera immature	Hemiptera	1	10
Vegetation Swath	2011-06-21	2011	2	Thripidae	Thysanoptera	1	10
Vegetation Swath	2011-06-21	2011	2	Cicadellidae immature	Hemiptera	1	10
Vegetation Swath	2011-06-21	2011	2	Cercopidae	Hemiptera	1	10
Vegetation Swath	2011-06-21	2011	2	Cecidomyiidae	Diptera	2	20
Vegetation Swath	2011-06-21	2011	2	Chironomidae	Diptera	4	40
Vegetation Swath	2011-06-21	2011	2	Sminthuridae	Collembola	1	10
Vegetation Swath	2011-06-21	2011	2	Entomobryidae	Collembola	3	30
Vegetation Swath	2011-06-21	2011	3	Coccinellidae	Coleoptera	1	10
Vegetation Swath	2011-06-21	2011	3	Mymaridae	Hymenoptera	1	10
Vegetation Swath	2011-06-21	2011	3	Psyllidae	Hemiptera	1	10
Vegetation Swath	2011-06-21	2011	3	Aphididae	Hemiptera	15	150	15 wingless
Vegetation Swath	2011-06-21	2011	3	Cecidomyiidae	Diptera	1	10
Vegetation Swath	2011-06-21	2011	3	Muscidae	Diptera	1	10
Vegetation Swath	2011-06-21	2011	3	Thysanoptera immature	Thysanoptera	2	20
Vegetation Swath	2011-06-21	2011	3	Ichneumonidae	Hymenoptera	1	10
Vegetation Swath	2011-06-21	2011	3	Gastropoda slug	Gastropoda	1	10
Vegetation Swath	2011-06-21	2011	3	Chironomidae	Diptera	3	30
Vegetation Swath	2011-06-21	2011	3	Sminthuridae	Collembola	46	460
Vegetation Swath	2011-06-21	2011	3	Acari	Acari	4	40
Vegetation Swath	2011-06-21	2011	3	Entomobryidae	Collembola	14	140
Vegetation Swath	2011-06-21	2011	3	Hypogastruridae	Collembola	1	10
Vegetation Swath	2011-06-21	2011	4	Sciaridae	Diptera	1	10
Vegetation Swath	2011-06-21	2011	4	Calliphoridae	Diptera	3	30
Vegetation Swath	2011-06-21	2011	4	Aphididae	Hemiptera	1	10	1 wingless
Vegetation Swath	2011-06-21	2011	4	Anthomyiidae	Diptera	1	10
Vegetation Swath	2011-06-21	2011	4	Chironomidae	Diptera	3	30
Vegetation Swath	2011-06-21	2011	4	Apididae	Hymenoptera	1	10
Vegetation Swath	2011-06-21	2011	5	Cercopidae	Hemiptera	2	20
Vegetation Swath	2011-06-21	2011	5	Cicadellidae immature	Hemiptera	1	10
Vegetation Swath	2011-06-21	2011	5	Cicadellidae	Hemiptera	2	20
Vegetation Swath	2011-06-21	2011	5	Muscidae	Diptera	2	20
Vegetation Swath	2011-06-21	2011	5	Sciaridae	Diptera	3	30
Vegetation Swath	2011-06-21	2011	5	Thysanoptera immature	Thysanoptera	1	10
Vegetation Swath	2011-06-21	2011	5	Ichneumonidae	Hymenoptera	1	10
Vegetation Swath	2011-06-21	2011	5	Phoridae	Diptera	1	10
Vegetation Swath	2011-06-21	2011	5	Symphyta larva	Hymenoptera	1	10
Vegetation Swath	2011-06-21	2011	5	Aphididae	Hemiptera	7	70	6 wingless 1 winged
Vegetation Swath	2011-06-21	2011	5	Sminthuridae	Collembola	12	120
Vegetation Swath	2011-06-21	2011	5	Acari	Acari	1	10
Vegetation Swath	2011-06-21	2011	5	Isotomidae	Collembola	2	20
Vegetation Swath	2011-06-21	2011	5	Entomobryidae	Collembola	5	50
Vegetation Swath	2011-06-21	2011	5	Hypogastruridae	Collembola	1	10
Vegetation Swath	2011-06-21	2011	6	Aphididae	Hemiptera	53	530	50 wingless 3 winged
Vegetation Swath	2011-06-21	2011	6	Cercopidae	Hemiptera	4	40
Vegetation Swath	2011-06-21	2011	6	Cicadellidae	Hemiptera	1	10
Vegetation Swath	2011-06-21	2011	6	Ichneumonidae	Hymenoptera	1	10
Vegetation Swath	2011-06-21	2011	6	Psychodidae	Diptera	1	10
Vegetation Swath	2011-06-21	2011	6	Figitidae	Hymenoptera	1	10
Vegetation Swath	2011-06-21	2011	6	Sminthuridae	Collembola	16	160
Vegetation Swath	2011-06-21	2011	6	Acari	Acari	3	30
Vegetation Swath	2011-06-21	2011	6	Entomobryidae	Collembola	15	150
Vegetation Swath	2011-06-21	2011	7	Cicadellidae	Hemiptera	4	40
Vegetation Swath	2011-06-21	2011	7	Cecidomyiidae	Diptera	4	40
Vegetation Swath	2011-06-21	2011	7	Carabidae	Coleoptera	1	10
Vegetation Swath	2011-06-21	2011	7	Araneae	Arachnida	1	10
Vegetation Swath	2011-06-21	2011	7	Thysanoptera immature	Thysanoptera	4	40
Vegetation Swath	2011-06-21	2011	7	Cicadellidae	Hemiptera	2	20
Vegetation Swath	2011-06-21	2011	7	Sciaridae	Diptera	1	10
Vegetation Swath	2011-06-21	2011	7	Lepidoptera	Lepidoptera	1	10
Vegetation Swath	2011-06-21	2011	7	Chironomidae	Diptera	4	40
Vegetation Swath	2011-06-21	2011	7	Sminthuridae	Collembola	112	1120
Vegetation Swath	2011-06-21	2011	7	Aphididae	Hemiptera	12	120	12 wingless
Vegetation Swath	2011-06-21	2011	7	Entomobryidae	Collembola	2	20
Seawall	2011-07-07	2011	1	Acari	Acari	4	40
Seawall	2011-07-07	2011	1	Coccoidea	Hemiptera	1	10
Seawall	2011-07-07	2011	1	Phoridae	Diptera	1	10
Seawall	2011-07-07	2011	1	Anthomyzidae	Diptera	1	10
Seawall	2011-07-07	2011	2	Acari	Acari	3	30
Seawall	2011-07-07	2011	2	Psocoptera	Psocoptera	1	10
Seawall	2011-07-07	2011	2	Psychodidae	Diptera	1	10
Seawall	2011-07-07	2011	3	Acari	Acari	3	30
Seawall	2011-07-07	2011	3	Empididae	Diptera	1	10
Seawall	2011-07-07	2011	3	Sciaridae	Diptera	2	20
Seawall	2011-07-07	2011	3	Phoridae	Diptera	1	10
Seawall	2011-07-07	2011	3	Psocoptera	Psocoptera	1	10
Seawall	2011-07-07	2011	3	Chironomidae	Diptera	1	10
Seawall	2011-07-07	2011	4	Chironomidae	Diptera	6	60
Seawall	2011-07-07	2011	4	Psocoptera	Psocoptera	1	10
Seawall	2011-07-07	2011	4	Acari	Acari	1	10
Seawall	2011-07-07	2011	4	Dolichopodidae	Diptera	1	10
Seawall	2011-07-07	2011	5	Chironomidae	Diptera	3	30
Seawall	2011-07-07	2011	5	Phoridae	Diptera	1	10
Seawall	2011-07-07	2011	5	Sciaridae	Diptera	1	10
Seawall	2011-07-07	2011	5	Aphididae	Hemiptera	1	10	1 winged
Seawall	2011-07-07	2011	5	Acari	Acari	2	20
Seawall	2011-07-07	2011	6	Diapriidae	Hymenoptera	1	10
Seawall	2011-07-07	2011	6	Latridiidae	Coleoptera	1	10
Seawall	2011-07-07	2011	6	Chironomidae	Diptera	2	20
Seawall	2011-07-07	2011	6	Acari	Acari	2	20
Seawall	2011-07-07	2011	7	Psocoptera	Psocoptera	1	10
Seawall	2011-07-07	2011	7	Sternorrhyncha immature	Hemiptera	2	20
Seawall	2011-07-07	2011	7	Chironomidae	Diptera	5	50
Seawall	2011-07-07	2011	7	Sminthuridae	Collembola	1	10
Seawall	2011-07-07	2011	7	Acari	Acari	20	200
Pocket Beach	2011-07-07	2011	1	Thysanoptera immature	Thysanoptera	3	30
Pocket Beach	2011-07-07	2011	1	Lepidoptera larva	Lepidoptera	1	10
Pocket Beach	2011-07-07	2011	1	Empididae	Diptera	2	20
Pocket Beach	2011-07-07	2011	1	Muscidae	Diptera	2	20
Pocket Beach	2011-07-07	2011	1	Cecidomyiidae	Diptera	1	10
Pocket Beach	2011-07-07	2011	1	Symphyta larva	Hymenoptera	1	10
Pocket Beach	2011-07-07	2011	1	Phoridae	Diptera	1	10
Pocket Beach	2011-07-07	2011	1	Aphididae	Hemiptera	3	30	3 wingless
Pocket Beach	2011-07-07	2011	1	Acari	Acari	1	10
Pocket Beach	2011-07-07	2011	1	Entomobryidae	Collembola	25	250
Pocket Beach	2011-07-07	2011	2	Calliphoridae	Diptera	2	20
Pocket Beach	2011-07-07	2011	2	Thripidae	Thysanoptera	14	140
Pocket Beach	2011-07-07	2011	2	Thysanoptera immature	Thysanoptera	3	30
Pocket Beach	2011-07-07	2011	2	Sciaridae	Diptera	1	10
Pocket Beach	2011-07-07	2011	2	Cercopidae	Hemiptera	1	10
Pocket Beach	2011-07-07	2011	2	Coccoidea	Hemiptera	1	10
Pocket Beach	2011-07-07	2011	2	Cicadellidae	Hemiptera	1	10
Pocket Beach	2011-07-07	2011	2	Dolichopodidae	Diptera	1	10
Pocket Beach	2011-07-07	2011	2	Chironomidae	Diptera	5	50
Pocket Beach	2011-07-07	2011	2	Aphididae	Hemiptera	4	40	4 wingless
Pocket Beach	2011-07-07	2011	2	Entomobryidae	Collembola	6	60
Pocket Beach	2011-07-07	2011	3	Calliphoridae	Diptera	2	20
Pocket Beach	2011-07-07	2011	3	Dolichopodidae	Diptera	1	10
Pocket Beach	2011-07-07	2011	3	Hemerobiidae larva	Neuroptera	1	10
Pocket Beach	2011-07-07	2011	3	Psocoptera immature	Psocoptera	1	10
Pocket Beach	2011-07-07	2011	3	Cercopidae	Hemiptera	2	20
Pocket Beach	2011-07-07	2011	3	Aphididae	Hemiptera	2	20	2 wingless
Pocket Beach	2011-07-07	2011	3	Acari	Acari	1	10
Pocket Beach	2011-07-07	2011	3	Entomobryidae	Collembola	7	70
Pocket Beach	2011-07-07	2011	4	Dolichopodidae	Diptera	1	10
Pocket Beach	2011-07-07	2011	4	Cercopidae	Hemiptera	2	20
Pocket Beach	2011-07-07	2011	4	Muscidae	Diptera	1	10
Pocket Beach	2011-07-07	2011	4	Braconidae	Hymenoptera	1	10
Pocket Beach	2011-07-07	2011	4	Thysanoptera immature	Thysanoptera	1	10
Pocket Beach	2011-07-07	2011	4	Cicadellidae	Hemiptera	1	10
Pocket Beach	2011-07-07	2011	4	Araneae	Arachnida	1	10
Pocket Beach	2011-07-07	2011	4	Chrysopidae	Neuroptera	1	10
Pocket Beach	2011-07-07	2011	4	Chironomidae	Diptera	1	10
Pocket Beach	2011-07-07	2011	4	Acari	Acari	4	40
Pocket Beach	2011-07-07	2011	4	Entomobryidae	Collembola	3	30
Pocket Beach	2011-07-07	2011	5	Opiliones	Arachnida	1	10
Pocket Beach	2011-07-07	2011	5	Araneae	Arachnida	2	20
Pocket Beach	2011-07-07	2011	5	Dolichopodidae	Diptera	1	10
Pocket Beach	2011-07-07	2011	5	Cecidomyiidae	Diptera	2	20
Pocket Beach	2011-07-07	2011	5	Auchenorrhyncha immature	Hemiptera	1	10
Pocket Beach	2011-07-07	2011	5	Latridiidae	Coleoptera	1	10
Pocket Beach	2011-07-07	2011	5	Sciaridae	Diptera	1	10
Pocket Beach	2011-07-07	2011	5	Phoridae	Diptera	1	10
Pocket Beach	2011-07-07	2011	5	Thysanoptera immature	Thysanoptera	4	40
Pocket Beach	2011-07-07	2011	5	Psychodidae	Diptera	1	10
Pocket Beach	2011-07-07	2011	5	Aphididae	Hemiptera	25	250	24 wingless 1 winged
Pocket Beach	2011-07-07	2011	5	Ichneumonidae	Hymenoptera	1	10
Pocket Beach	2011-07-07	2011	5	Gastropoda slug	Gastropoda	1	10
Pocket Beach	2011-07-07	2011	5	Chironomidae	Diptera	4	40
Pocket Beach	2011-07-07	2011	5	Acari	Acari	5	50
Pocket Beach	2011-07-07	2011	5	Entomobryidae	Collembola	81	810
Pocket Beach	2011-07-07	2011	6	Psocoptera immature	Psocoptera	2	20
Pocket Beach	2011-07-07	2011	6	Symphyta larva	Hymenoptera	1	10
Pocket Beach	2011-07-07	2011	6	Cicadellidae immature	Hemiptera	1	10
Pocket Beach	2011-07-07	2011	6	Phoridae	Diptera	2	20
Pocket Beach	2011-07-07	2011	6	Dolichopodidae	Diptera	1	10
Pocket Beach	2011-07-07	2011	6	Aphididae	Hemiptera	6	60	5 wingless 1 winged
Pocket Beach	2011-07-07	2011	6	Chironomidae	Diptera	1	10
Pocket Beach	2011-07-07	2011	6	Acari	Acari	1	10
Pocket Beach	2011-07-07	2011	6	Entomobryidae	Collembola	12	120
Pocket Beach	2011-07-07	2011	7	Thysanoptera immature	Thysanoptera	6	60
Pocket Beach	2011-07-07	2011	7	Thripidae	Thysanoptera	1	10
Pocket Beach	2011-07-07	2011	7	Phoridae	Diptera	2	20
Pocket Beach	2011-07-07	2011	7	Araneae	Arachnida	1	10
Pocket Beach	2011-07-07	2011	7	Cercopidae	Hemiptera	1	10
Pocket Beach	2011-07-07	2011	7	Coccoidea	Hemiptera	1	10
Pocket Beach	2011-07-07	2011	7	Psocoptera immature	Psocoptera	1	10
Pocket Beach	2011-07-07	2011	7	Sciaridae	Diptera	1	10
Pocket Beach	2011-07-07	2011	7	Ephydridae	Diptera	1	10
Pocket Beach	2011-07-07	2011	7	Cecidomyiidae	Diptera	1	10
Pocket Beach	2011-07-07	2011	7	Chironomidae	Diptera	1	10
Pocket Beach	2011-07-07	2011	7	Aphididae	Hemiptera	4	40	4 wingless
Pocket Beach	2011-07-07	2011	7	Isotomidae	Collembola	1	10
Pocket Beach	2011-07-07	2011	7	Entomobryidae	Collembola	7	70
Riparian	2011-07-07	2011	1	Syrphidae	Diptera	1	10
Riparian	2011-07-07	2011	1	Latridiidae	Coleoptera	1	10
Riparian	2011-07-07	2011	1	Cecidomyiidae	Diptera	3	30
Riparian	2011-07-07	2011	1	Mymaridae	Hymenoptera	2	20
Riparian	2011-07-07	2011	1	Phoridae	Diptera	1	10
Riparian	2011-07-07	2011	1	Araneae	Arachnida	1	10
Riparian	2011-07-07	2011	1	Chironomidae	Diptera	1	10
Riparian	2011-07-07	2011	1	Aphididae	Hemiptera	15	150	15 wingless
Riparian	2011-07-07	2011	1	Acari	Acari	6	60
Riparian	2011-07-07	2011	1	Entomobryidae	Collembola	27	270
Riparian	2011-07-07	2011	1	Thysanoptera immature	Thysanoptera	16	160
Riparian	2011-07-07	2011	1	Pteromalidae	Hymenoptera	1	10
Riparian	2011-07-07	2011	2	Cicadellidae	Hemiptera	2	20
Riparian	2011-07-07	2011	2	Araneae	Arachnida	1	10
Riparian	2011-07-07	2011	2	Eupelmidae	Hymenoptera	1	10
Riparian	2011-07-07	2011	2	Cecidomyiidae	Diptera	1	10
Riparian	2011-07-07	2011	2	Psocoptera immature	Psocoptera	2	20
Riparian	2011-07-07	2011	2	Thripidae	Thysanoptera	1	10
Riparian	2011-07-07	2011	2	Psocoptera	Psocoptera	1	10
Riparian	2011-07-07	2011	2	Braconidae	Hymenoptera	1	10
Riparian	2011-07-07	2011	2	Chironomidae	Diptera	9	90
Riparian	2011-07-07	2011	2	Aphididae	Hemiptera	5	50	5 wingless
Riparian	2011-07-07	2011	2	Acari	Acari	7	70
Riparian	2011-07-07	2011	2	Entomobryidae	Collembola	19	190
Riparian	2011-07-07	2011	2	Thysanoptera immature	Thysanoptera	2	20
Riparian	2011-07-07	2011	2	Aphelinidae	Hymenoptera	1	10
Riparian	2011-07-07	2011	2	Braconidae	Hymenoptera	1	10
Riparian	2011-07-07	2011	3	Cecidomyiidae	Diptera	1	10
Riparian	2011-07-07	2011	3	Psychodidae	Diptera	1	10
Riparian	2011-07-07	2011	3	Cecidomyiidae larva	Diptera	18	180
Riparian	2011-07-07	2011	3	Chironomidae	Diptera	2	20
Riparian	2011-07-07	2011	3	Aphididae	Hemiptera	2	20	2 wingless
Riparian	2011-07-07	2011	3	Acari	Acari	11	110
Riparian	2011-07-07	2011	3	Entomobryidae	Collembola	7	70
Riparian	2011-07-07	2011	3	Hypogastruridae	Collembola	1	10
Riparian	2011-07-07	2011	4	Psocoptera immature	Psocoptera	4	40
Riparian	2011-07-07	2011	4	Cicadellidae immature	Hemiptera	1	10
Riparian	2011-07-07	2011	4	Thysanoptera immature	Thysanoptera	2	20
Riparian	2011-07-07	2011	4	Gastropoda slug	Gastropoda	1	10
Riparian	2011-07-07	2011	4	Forficulidae	Dermaptera	1	10
Riparian	2011-07-07	2011	4	Sciaridae	Diptera	2	20
Riparian	2011-07-07	2011	4	Hymenoptera larva	Hymenoptera	1	10
Riparian	2011-07-07	2011	4	Chironomidae	Diptera	1	10
Riparian	2011-07-07	2011	4	Acari	Acari	13	130
Riparian	2011-07-07	2011	4	Entomobryidae	Collembola	50	500
Riparian	2011-07-07	2011	5	Psychodidae	Diptera	9	90
Riparian	2011-07-07	2011	5	Mymaridae	Hymenoptera	2	20
Riparian	2011-07-07	2011	5	Cecidomyiidae larva	Diptera	1	10
Riparian	2011-07-07	2011	5	Aphididae	Hemiptera	6	60
Riparian	2011-07-07	2011	5	Cecidomyiidae	Diptera	2	20
Riparian	2011-07-07	2011	5	Onychiuridae	Collembola	2	20
Riparian	2011-07-07	2011	5	Cercopidae	Hemiptera	1	10
Riparian	2011-07-07	2011	5	Sphaeroceridae	Diptera	1	10
Riparian	2011-07-07	2011	5	Hemiptera immature	Hemiptera	1	10
Riparian	2011-07-07	2011	5	Culicidae	Diptera	2	20
Riparian	2011-07-07	2011	5	Sciaridae	Diptera	1	10
Riparian	2011-07-07	2011	5	Drosophilidae	Diptera	1	10
Riparian	2011-07-07	2011	5	Chironomidae	Diptera	3	30
Riparian	2011-07-07	2011	5	Acari	Acari	18	180
Riparian	2011-07-07	2011	5	Entomobryidae	Collembola	21	210
Riparian	2011-07-07	2011	5	Hypogastruridae	Collembola	1	10
Riparian	2011-07-07	2011	5	Throscidae	Coleoptera	1	10
Riparian	2011-07-07	2011	6	Torymidae	Hymenoptera	1	10
Riparian	2011-07-07	2011	6	Chrysopidae	Neuroptera	1	10
Riparian	2011-07-07	2011	6	Lepidoptera larva	Lepidoptera	1	10
Riparian	2011-07-07	2011	6	Muscidae	Diptera	1	10
Riparian	2011-07-07	2011	6	Tipulidae	Diptera	1	10
Riparian	2011-07-07	2011	6	Cecidomyiidae	Diptera	2	20
Riparian	2011-07-07	2011	6	Chironomidae	Diptera	4	40
Riparian	2011-07-07	2011	6	Aphididae	Hemiptera	10	100	10 wingless
Riparian	2011-07-07	2011	6	Acari	Acari	5	50
Riparian	2011-07-07	2011	6	Entomobryidae	Collembola	20	200
Riparian	2011-07-07	2011	7	no sample
RipRap	2011-07-07	2011	1	Chironomidae	Diptera	6	60	this set was originally mis-labelled seawall
RipRap	2011-07-07	2011	1	Cicadellidae	Hemiptera	1	10
RipRap	2011-07-07	2011	1	Psychodidae	Diptera	1	10
RipRap	2011-07-07	2011	1	Entomobryidae	Collembola	1	10
RipRap	2011-07-07	2011	2	Chironomidae	Diptera	5	50
RipRap	2011-07-07	2011	2	Psychodidae	Diptera	3	30
RipRap	2011-07-07	2011	2	Ceraphronidae	Hymenoptera	1	10
RipRap	2011-07-07	2011	2	Cecidomyiidae	Diptera	1	10
RipRap	2011-07-07	2011	2	Acari	Acari	1	10
RipRap	2011-07-07	2011	3	Cecidomyiidae	Diptera	2	20
RipRap	2011-07-07	2011	3	Lepidoptera	Lepidoptera	1	10
RipRap	2011-07-07	2011	3	psychodidae	Diptera	3	30
RipRap	2011-07-07	2011	3	Sciaridae	Diptera	1	10
RipRap	2011-07-07	2011	3	Sphaeroceridae	Diptera	1	10
RipRap	2011-07-07	2011	3	Aphididae	Hemiptera	1	10	1 wingless
RipRap	2011-07-07	2011	3	Chironomidae	Diptera	5	50
RipRap	2011-07-07	2011	4	Chironomidae	Diptera	5	50
RipRap	2011-07-07	2011	4	Psychodidae	Diptera	3	30
RipRap	2011-07-07	2011	4	Sciaridae	Diptera	1	10
RipRap	2011-07-07	2011	5	Chironomidae	Diptera	6	60
RipRap	2011-07-07	2011	5	Psychodidae	Diptera	2	20
RipRap	2011-07-07	2011	5	Sphaeroceridae	Diptera	1	10
RipRap	2011-07-07	2011	5	Aphididae	Hemiptera	2	20	2 wingless
RipRap	2011-07-07	2011	6	Psychodidae	Diptera	2	20
RipRap	2011-07-07	2011	6	Cecidomyiidae	Diptera	1	10
RipRap	2011-07-07	2011	6	Sciaridae	Diptera	1	10
RipRap	2011-07-07	2011	6	Lepidoptera	Lepidoptera	1	10
RipRap	2011-07-07	2011	6	Chironomidae	Diptera	2	20
RipRap	2011-07-07	2011	6	Tipulidae	Diptera	1	10
RipRap	2011-07-07	2011	6	Aphididae	Hemiptera	1	10
RipRap	2011-07-07	2011	6	Sphaeroceridae	Diptera	1	10
RipRap	2011-07-07	2011	7	Chironomidae	Diptera	1	10
RipRap	2011-07-07	2011	7	Sphaeroceridae	Diptera	2	20
RipRap	2011-07-07	2011	7	Sciaridae	Diptera	1	10
RipRap	2011-07-07	2011	7	Cicadellidae	Hemiptera	1	10
Vegetation Swath	2011-07-07	2011	1	Mymaridae	Hymenoptera	1	10
Vegetation Swath	2011-07-07	2011	1	Thysanoptera immature	Thysanoptera	2	20
Vegetation Swath	2011-07-07	2011	1	Araneae	Arachnida	1	10
Vegetation Swath	2011-07-07	2011	1	Cecidomyiidae	Diptera	3	30
Vegetation Swath	2011-07-07	2011	1	Ceraphronidae	Hymenoptera	1	10
Vegetation Swath	2011-07-07	2011	1	Cicadellidae	Hemiptera	3	30
Vegetation Swath	2011-07-07	2011	1	Miridae	Hemiptera	1	10
Vegetation Swath	2011-07-07	2011	1	Miridae immature	Hemiptera	1	10
Vegetation Swath	2011-07-07	2011	1	Lepidoptera larva	Lepidoptera	1	10
Vegetation Swath	2011-07-07	2011	1	Aphididae	Hemiptera	59	590	58 wingless 1 winged
Vegetation Swath	2011-07-07	2011	1	Cercopidae	Hemiptera	1	10
Vegetation Swath	2011-07-07	2011	1	Braconidae	Hymenoptera	2	20
Vegetation Swath	2011-07-07	2011	1	Cecidomyiidae larva	Diptera	3	30
Vegetation Swath	2011-07-07	2011	1	Ichneumonidae	Hymenoptera	1	10
Vegetation Swath	2011-07-07	2011	1	Anthomyiidae	Diptera	1	10
Vegetation Swath	2011-07-07	2011	1	Encyrtidae	Hymenoptera	1	10
Vegetation Swath	2011-07-07	2011	1	Chironomidae	Diptera	1	10
Vegetation Swath	2011-07-07	2011	1	Sminthuridae	Collembola	1	10
Vegetation Swath	2011-07-07	2011	1	Acari	Acari	9	90
Vegetation Swath	2011-07-07	2011	1	Entomobryidae	Collembola	25	250
Vegetation Swath	2011-07-07	2011	1	Thysanoptera immature	Thysanoptera	4	40
Vegetation Swath	2011-07-07	2011	2	Cercopidae	Hemiptera	2	20
Vegetation Swath	2011-07-07	2011	2	Gastropoda slug	Gastropoda	1	10
Vegetation Swath	2011-07-07	2011	2	Braconidae	Hymenoptera	1	10
Vegetation Swath	2011-07-07	2011	2	Psocoptera	Psocoptera	1	10
Vegetation Swath	2011-07-07	2011	2	Cicadellidae	Hemiptera	2	20
Vegetation Swath	2011-07-07	2011	2	Syrphidae	Diptera	1	10
Vegetation Swath	2011-07-07	2011	2	Hemerobiidae larva	Neuroptera	1	10
Vegetation Swath	2011-07-07	2011	2	Throscidae	Coleoptera	1	10
Vegetation Swath	2011-07-07	2011	2	Encyrtidae	Hymenoptera	1	10
Vegetation Swath	2011-07-07	2011	2	Hemiptera immature	Hemiptera	1	10
Vegetation Swath	2011-07-07	2011	2	Chironomidae	Diptera	2	20
Vegetation Swath	2011-07-07	2011	2	Aphididae	Hemiptera	36	360
Vegetation Swath	2011-07-07	2011	2	Sminthuridae	Collembola	7	70
Vegetation Swath	2011-07-07	2011	2	Acari	Acari	5	50
Vegetation Swath	2011-07-07	2011	2	Entomobryidae	Collembola	6	60
Vegetation Swath	2011-07-07	2011	2	Thysanoptera immature	Thysanoptera	2	20
Vegetation Swath	2011-07-07	2011	2	Sepsidae	Diptera	1	10
Vegetation Swath	2011-07-07	2011	3	Cercopidae	Hemiptera	2	20
Vegetation Swath	2011-07-07	2011	3	Araneae	Arachnida	1	10
Vegetation Swath	2011-07-07	2011	3	Symphyta larva	Hymenoptera	1	10
Vegetation Swath	2011-07-07	2011	3	Aphididae	Hemiptera	6	60	6 wingless
Vegetation Swath	2011-07-07	2011	3	Entomobryidae	Collembola	179	1790
Vegetation Swath	2011-07-07	2011	3	Chironomidae	Diptera	1	10
Vegetation Swath	2011-07-07	2011	3	Sminthuridae	Collembola	18	180
Vegetation Swath	2011-07-07	2011	3	Acari	Acari	15	150
Vegetation Swath	2011-07-07	2011	4	Cecidomyiidae	Diptera	4	40
Vegetation Swath	2011-07-07	2011	4	Staphylinidae	Coleoptera	1	10
Vegetation Swath	2011-07-07	2011	4	Cercopidae	Hemiptera	1	10
Vegetation Swath	2011-07-07	2011	4	Sphaeroceridae	Diptera	1	10
Vegetation Swath	2011-07-07	2011	4	Lepidoptera larva	Lepidoptera	1	10
Vegetation Swath	2011-07-07	2011	4	Thripidae	Thysanoptera	1	10
Vegetation Swath	2011-07-07	2011	4	Aphididae	Hemiptera	9	90	9 wingless
Vegetation Swath	2011-07-07	2011	4	Sminthuridae	Collembola	349	3490
Vegetation Swath	2011-07-07	2011	4	Acari	Acari	5	50
Vegetation Swath	2011-07-07	2011	4	Entomobryidae	Collembola	20	200
Vegetation Swath	2011-07-07	2011	4	Thysanoptera immature	Thysanoptera	6	60
Vegetation Swath	2011-07-07	2011	5	Empididae	Diptera	1	10
Vegetation Swath	2011-07-07	2011	5	Braconidae	Hymenoptera	2	20
Vegetation Swath	2011-07-07	2011	5	Cicadellidae	Hemiptera	2	20
Vegetation Swath	2011-07-07	2011	5	Cercopidae	Hemiptera	3	30
Vegetation Swath	2011-07-07	2011	5	Sphaeroceridae	Diptera	1	10
Vegetation Swath	2011-07-07	2011	5	Araneae	Arachnida	1	10
Vegetation Swath	2011-07-07	2011	5	Aphididae	Hemiptera	73	730	72 wingless 1 winged
Vegetation Swath	2011-07-07	2011	5	Cecidomyiidae	Diptera	1	10
Vegetation Swath	2011-07-07	2011	5	Chironomidae	Diptera	2	20
Vegetation Swath	2011-07-07	2011	5	Sminthuridae	Collembola	438	4380
Vegetation Swath	2011-07-07	2011	5	Acari	Acari	107	1070
Vegetation Swath	2011-07-07	2011	5	Entomobryidae	Collembola	24	240
Vegetation Swath	2011-07-07	2011	5	Hypogastruridae	Collembola	32	320
Vegetation Swath	2011-07-07	2011	5	Thysanoptera immature	Thysanoptera	6	60
Vegetation Swath	2011-07-07	2011	6	Cicadellidae immature	Hemiptera	5	50
Vegetation Swath	2011-07-07	2011	6	Cercopidae	Hemiptera	1	10
Vegetation Swath	2011-07-07	2011	6	Cicadellidae	Hemiptera	2	20
Vegetation Swath	2011-07-07	2011	6	Sphaeroceridae	Diptera	1	10
Vegetation Swath	2011-07-07	2011	6	Muscidae	Diptera	1	10
Vegetation Swath	2011-07-07	2011	6	Araneae	Arachnida	1	10
Vegetation Swath	2011-07-07	2011	6	Aphididae	Hemiptera	25	250	24 wingless 1 winged
Vegetation Swath	2011-07-07	2011	6	Sminthuridae	Collembola	225	2250
Vegetation Swath	2011-07-07	2011	6	Acari	Acari	1	10
Vegetation Swath	2011-07-07	2011	6	Entomobryidae	Collembola	3	30
Vegetation Swath	2011-07-07	2011	6	Hypogastruridae	Collembola	1	10
Vegetation Swath	2011-07-07	2011	6	Thysanoptera immature	Thysanoptera	3	30
Vegetation Swath	2011-07-07	2011	7	Symphyta larva	Hymenoptera	1	10
Vegetation Swath	2011-07-07	2011	7	Cercopidae	Hemiptera	1	10
Vegetation Swath	2011-07-07	2011	7	Aphididae	Hemiptera	44	440
Vegetation Swath	2011-07-07	2011	7	Cicadellidae immature	Hemiptera	3	30
Vegetation Swath	2011-07-07	2011	7	Cecidomyiidae	Diptera	2	20
Vegetation Swath	2011-07-07	2011	7	Sciaridae	Diptera	1	10
Vegetation Swath	2011-07-07	2011	7	Gastropoda slug	Gastropoda	1	10
Vegetation Swath	2011-07-07	2011	7	Chironomidae	Diptera	1	10
Vegetation Swath	2011-07-07	2011	7	Sminthuridae	Collembola	335	3350
Vegetation Swath	2011-07-07	2011	7	Acari	Acari	5	50
Vegetation Swath	2011-07-07	2011	7	Entomobryidae	Collembola	6	60
Vegetation Swath	2011-07-07	2011	7	Hypogastruridae	Collembola	41	410
Vegetation Swath	2011-07-07	2011	7	Thysanoptera immature	Thysanoptera	4	40
RipRap	2011-07-18	2011	1	Acari	Acari	1	10
RipRap	2011-07-18	2011	1	Araneae	Arachnida	1	10
RipRap	2011-07-18	2011	2	Psocoptera	Psocoptera	1	10
RipRap	2011-07-18	2011	2	Chironomidae	Diptera	2	20
RipRap	2011-07-18	2011	2	Mymaridae	Hymenoptera	1	10
RipRap	2011-07-18	2011	2	Sciaridae	Diptera	1	10
RipRap	2011-07-18	2011	2	Ephydridae	Diptera	1	10
RipRap	2011-07-18	2011	3	Araneae	Arachnida	1	10
RipRap	2011-07-18	2011	3	Chironomidae	Diptera	3	30
RipRap	2011-07-18	2011	3	Aphididae	Hemiptera	1	10	1 winged
RipRap	2011-07-18	2011	3	Ephydridae	Diptera	1	10
RipRap	2011-07-18	2011	4	Chironomidae	Diptera	4	40
RipRap	2011-07-18	2011	4	Scelionidae	Hymenoptera	1	10
RipRap	2011-07-18	2011	4	Sciaridae	Diptera	1	10
RipRap	2011-07-18	2011	4	Psocoptera	Psocoptera	1	10
RipRap	2011-07-18	2011	4	Aphididae	Hemiptera	1	10	1 wingless
RipRap	2011-07-18	2011	5	Ephydridae	Diptera	1	10
RipRap	2011-07-18	2011	5	Chironomidae	Diptera	1	10
RipRap	2011-07-18	2011	5	Aphididae	Hemiptera	1	10	1 wingless
RipRap	2011-07-18	2011	5	Acari	Acari	32	320
RipRap	2011-07-18	2011	6	Acari	Acari	29	290
RipRap	2011-07-18	2011	6	Chironomidae	Diptera	1	10
RipRap	2011-07-18	2011	7	no sample
Seawall	2011-07-18	2011	1	Isotomidae	Collembola	1	10
Seawall	2011-07-18	2011	1	Aphididae	Hemiptera	2	20	2 wingless
Seawall	2011-07-18	2011	1	Cecidomyiidae	Diptera	1	10
Seawall	2011-07-18	2011	1	Sphaeroceridae	Diptera	1	10
Seawall	2011-07-18	2011	1	Psychodidae	Diptera	1	10
Seawall	2011-07-18	2011	1	Chironomidae	Diptera	1	10
Seawall	2011-07-18	2011	1	Psocoptera	Psocoptera	1	10
Seawall	2011-07-18	2011	2	Formicidae	Hymenoptera	1	10	winged
Seawall	2011-07-18	2011	2	Psychodidae	Diptera	1	10
Seawall	2011-07-18	2011	2	Cicadellidae	Hemiptera	2	20
Seawall	2011-07-18	2011	2	Cecidomyiidae	Diptera	2	20
Seawall	2011-07-18	2011	2	Chironomidae	Diptera	1	10
Seawall	2011-07-18	2011	2	Diptera	Diptera	1	10	left as Diptera
Seawall	2011-07-18	2011	3	Psychodidae	Diptera	1	10
Seawall	2011-07-18	2011	3	Coccoidea	Hemiptera	1	10
Seawall	2011-07-18	2011	3	Aphididae	Hemiptera	1	10	1 winged
Seawall	2011-07-18	2011	4	Psocoptera	Psocoptera	1	10
Seawall	2011-07-18	2011	4	Psychodidae	Diptera	1	10
Seawall	2011-07-18	2011	4	Phlaeothripidae	Thysanoptera	1	10
Seawall	2011-07-18	2011	4	Coccoidea	Hemiptera	1	10
Seawall	2011-07-18	2011	5	Psychodidae	Diptera	1	10
Seawall	2011-07-18	2011	5	Aphididae	Hemiptera	1	10	1 wingless
Seawall	2011-07-18	2011	5	Chironomidae	Diptera	2	20
Seawall	2011-07-18	2011	5	Cynipidae	Hymenoptera	1	10
Seawall	2011-07-18	2011	5	Sciaridae	Diptera	2	20
Seawall	2011-07-18	2011	5	Araneae	Arachnida	1	10
Seawall	2011-07-18	2011	5	Psocoptera immature	Psocoptera	1	10
Seawall	2011-07-18	2011	5	Mymaridae	Hymenoptera	1	10
Seawall	2011-07-18	2011	6	Chironomidae	Diptera	3	30
Seawall	2011-07-18	2011	6	Cecidomyiidae	Diptera	1	10
Seawall	2011-07-18	2011	6	Psychodidae	Diptera	3	30
Seawall	2011-07-18	2011	6	Formicidae	Hymenoptera	1	10	winged
Seawall	2011-07-18	2011	6	Acari	Acari	1	10
Seawall	2011-07-18	2011	7	Ceraphronidae	Hymenoptera	1	10
Seawall	2011-07-18	2011	7	Sciaridae	Diptera	1	10
Seawall	2011-07-18	2011	7	Cecidomyiidae	Diptera	2	20
Seawall	2011-07-18	2011	7	Sphaeroceridae	Diptera	1	10
Seawall	2011-07-18	2011	7	Psocoptera immature	Psocoptera	1	10
Seawall	2011-07-18	2011	7	Entomobryidae	Collembola	1	10
Seawall	2011-07-18	2011	7	Chironomidae	Diptera	1	10
Riparian	2011-07-18	2011	1	Psocoptera immature	Psocoptera	1	10
Riparian	2011-07-18	2011	1	Mymaridae	Hymenoptera	1	10
Riparian	2011-07-18	2011	1	Cecidomyiidae	Diptera	2	20
Riparian	2011-07-18	2011	1	Psocoptera	Psocoptera	1	10
Riparian	2011-07-18	2011	1	Sciaridae	Diptera	2	20
Riparian	2011-07-18	2011	1	Ceraphronidae	Hymenoptera	1	10
Riparian	2011-07-18	2011	1	Cecidomyiidae larva	Diptera	2	20
Riparian	2011-07-18	2011	1	Chironomidae	Diptera	2	20
Riparian	2011-07-18	2011	1	Acari	Acari	12	120
Riparian	2011-07-18	2011	1	Entomobryidae	Collembola	23	230
Riparian	2011-07-18	2011	2	Psocoptera immature	Psocoptera	1	10
Riparian	2011-07-18	2011	2	Cecidomyiidae	Diptera	4	40
Riparian	2011-07-18	2011	2	Eulophidae	Hymenoptera	1	10
Riparian	2011-07-18	2011	2	Tipulidae	Diptera	1	10
Riparian	2011-07-18	2011	2	Scelionidae	Hymenoptera	1	10
Riparian	2011-07-18	2011	2	Formicidae	Hymenoptera	1	10	wingless
Riparian	2011-07-18	2011	2	Latridiidae	Coleoptera	1	10
Riparian	2011-07-18	2011	2	Mymaridae	Hymenoptera	1	10
Riparian	2011-07-18	2011	2	Psocoptera	Psocoptera	1	10
Riparian	2011-07-18	2011	2	Cecidomyiidae larva	Diptera	5	50
Riparian	2011-07-18	2011	2	Ceraphronidae	Hymenoptera	1	10
Riparian	2011-07-18	2011	2	Chironomidae	Diptera	3	30
Riparian	2011-07-18	2011	2	Aphididae	Hemiptera	7	70	7 wingless
Riparian	2011-07-18	2011	2	Acari	Acari	4	40
Riparian	2011-07-18	2011	2	Entomobryidae	Collembola	64	640
Riparian	2011-07-18	2011	2	Hypogastruridae	Collembola	1	10
Riparian	2011-07-18	2011	2	Thysanoptera immature	Thysanoptera	2	20
Riparian	2011-07-18	2011	3	Psocoptera immature	Psocoptera	6	60
Riparian	2011-07-18	2011	3	Cercopidae	Hemiptera	1	10
Riparian	2011-07-18	2011	3	Psocoptera	Psocoptera	5	50
Riparian	2011-07-18	2011	3	Cecidomyiidae larva	Diptera	3	30
Riparian	2011-07-18	2011	3	Braconidae	Hymenoptera	1	10
Riparian	2011-07-18	2011	3	Psychodidae	Diptera	2	20
Riparian	2011-07-18	2011	3	Chloropidae	Diptera	1	10
Riparian	2011-07-18	2011	3	Lepidoptera larva	Lepidoptera	1	10
Riparian	2011-07-18	2011	3	Ichneumonidae	Hymenoptera	1	10
Riparian	2011-07-18	2011	3	Anthocoridae	Hemiptera	1	10
Riparian	2011-07-18	2011	3	Chironomidae	Diptera	4	40
Riparian	2011-07-18	2011	3	Aphididae	Hemiptera	24	240	24 wingless
Riparian	2011-07-18	2011	3	Acari	Acari	17	170
Riparian	2011-07-18	2011	3	Entomobryidae	Collembola	28	280
Riparian	2011-07-18	2011	4	Forficulidae	Dermaptera	1	10
Riparian	2011-07-18	2011	4	Latridiidae	Coleoptera	1	10
Riparian	2011-07-18	2011	4	Psocoptera	Psocoptera	7	70
Riparian	2011-07-18	2011	4	Thripidae	Thysanoptera	1	10
Riparian	2011-07-18	2011	4	Hemerobiidae larva	Neuroptera	1	10
Riparian	2011-07-18	2011	4	Coccinellidae	Coleoptera	1	10
Riparian	2011-07-18	2011	4	Cicadellidae immature	Hemiptera	1	10
Riparian	2011-07-18	2011	4	Hemerobiidae	Neuroptera	2	20
Riparian	2011-07-18	2011	4	Braconidae	Hymenoptera	1	10
Riparian	2011-07-18	2011	4	Scathophagidae	Diptera	3	30
Riparian	2011-07-18	2011	4	Chironomidae	Diptera	3	30
Riparian	2011-07-18	2011	4	Aphididae	Hemiptera	12	120	12 wingless
Riparian	2011-07-18	2011	4	Acari	Acari	6	60
Riparian	2011-07-18	2011	4	Entomobryidae	Collembola	16	160
Riparian	2011-07-18	2011	5	Psocoptera	Psocoptera	16	160
Riparian	2011-07-18	2011	5	Psocoptera immature	Psocoptera	9	90
Riparian	2011-07-18	2011	5	Aphididae	Hemiptera	13	130	9 wingless 4 winged
Riparian	2011-07-18	2011	5	Miridae	Hemiptera	1	10
Riparian	2011-07-18	2011	5	Syrphidae	Diptera	1	10
Riparian	2011-07-18	2011	5	Chironomidae	Diptera	1	10
Riparian	2011-07-18	2011	5	Acari	Acari	24	240
Riparian	2011-07-18	2011	5	Entomobryidae	Collembola	56	560
Riparian	2011-07-18	2011	6	Latridiidae	Coleoptera	1	10
Riparian	2011-07-18	2011	6	Cecidomyiidae	Diptera	3	30
Riparian	2011-07-18	2011	6	Sciaridae	Diptera	1	10
Riparian	2011-07-18	2011	6	Calliphoridae	Diptera	1	10
Riparian	2011-07-18	2011	6	Araneae	Arachnida	1	10
Riparian	2011-07-18	2011	6	Cercopidae	Hemiptera	1	10
Riparian	2011-07-18	2011	6	Chironomidae	Diptera	1	10
Riparian	2011-07-18	2011	6	Aphididae	Hemiptera	3	30	3 wingless
Riparian	2011-07-18	2011	6	Sminthuridae	Collembola	3	30
Riparian	2011-07-18	2011	6	Acari	Acari	8	80
Riparian	2011-07-18	2011	6	Entomobryidae	Collembola	5	50
Riparian	2011-07-18	2011	6	Hypogastruridae	Collembola	1	10
Riparian	2011-07-18	2011	6	Thysanoptera immature	Thysanoptera	4	40
Riparian	2011-07-18	2011	7	Hemerobiidae	Neuroptera	1	10
Riparian	2011-07-18	2011	7	Psocoptera	Psocoptera	5	50
Riparian	2011-07-18	2011	7	Mymaridae	Hymenoptera	1	10
Riparian	2011-07-18	2011	7	Gastropoda slug	Gastropoda	2	20
Riparian	2011-07-18	2011	7	Psocoptera	Psocoptera	1	10
Riparian	2011-07-18	2011	7	Sciaridae	Diptera	2	20
Riparian	2011-07-18	2011	7	Elateridae	Coleoptera	1	10
Riparian	2011-07-18	2011	7	Aphididae	Hemiptera	4	40	4 wingless
Riparian	2011-07-18	2011	7	Acari	Acari	23	230
Riparian	2011-07-18	2011	7	Entomobryidae	Collembola	150	1500
Riparian	2011-07-18	2011	7	Thysanoptera immature	Thysanoptera	2	20
Pocket Beach	2011-07-18	2011	1	Opiliones	Arachnida	1	10
Pocket Beach	2011-07-18	2011	1	Lepidoptera larva	Lepidoptera	1	10
Pocket Beach	2011-07-18	2011	1	Torymidae	Hymenoptera	2	20	Megastigminae
Pocket Beach	2011-07-18	2011	1	Cicadellidae immature	Hemiptera	2	20
Pocket Beach	2011-07-18	2011	1	Neuroptera larva	Neuroptera	1	10
Pocket Beach	2011-07-18	2011	1	Cecidomyiidae larva	Diptera	4	40
Pocket Beach	2011-07-18	2011	1	Mymaridae	Hymenoptera	2	20
Pocket Beach	2011-07-18	2011	1	Thripidae	Thysanoptera	3	30
Pocket Beach	2011-07-18	2011	1	Sciaridae	Diptera	1	10
Pocket Beach	2011-07-18	2011	1	Cecidomyiidae	Diptera	1	10
Pocket Beach	2011-07-18	2011	1	Cicadellidae	Hemiptera	1	10
Pocket Beach	2011-07-18	2011	1	Phoridae	Diptera	1	10
Pocket Beach	2011-07-18	2011	1	Chironomidae	Diptera	1	10
Pocket Beach	2011-07-18	2011	1	Aphididae	Hemiptera	11	110	11 wingless
Pocket Beach	2011-07-18	2011	1	Sminthuridae	Collembola	2	20
Pocket Beach	2011-07-18	2011	1	Acari	Acari	7	70
Pocket Beach	2011-07-18	2011	1	Entomobryidae	Collembola	35	350
Pocket Beach	2011-07-18	2011	1	Thysanoptera immature	Thysanoptera	15	150
Pocket Beach	2011-07-18	2011	2	Symphyta larva	Hymenoptera	1	10
Pocket Beach	2011-07-18	2011	2	Forficulidae	Dermaptera	1	10
Pocket Beach	2011-07-18	2011	2	Coleoptera larva	Coleoptera	1	10
Pocket Beach	2011-07-18	2011	2	Hemerobiidae larva	Neuroptera	1	10
Pocket Beach	2011-07-18	2011	2	Torymidae	Hymenoptera	1	10
Pocket Beach	2011-07-18	2011	2	Mymaridae	Hymenoptera	1	10
Pocket Beach	2011-07-18	2011	2	Chironomidae	Diptera	3	30
Pocket Beach	2011-07-18	2011	2	Aphididae	Hemiptera	25	250	25 wingless
Pocket Beach	2011-07-18	2011	2	Acari	Acari	1	10
Pocket Beach	2011-07-18	2011	2	Entomobryidae	Collembola	27	270
Pocket Beach	2011-07-18	2011	2	Thysanoptera immature	Thysanoptera	3	30
Pocket Beach	2011-07-18	2011	3	Tenthredinidae	Hymenoptera	1	10
Pocket Beach	2011-07-18	2011	3	Braconidae	Hymenoptera	1	10
Pocket Beach	2011-07-18	2011	3	Megaspilidae	Hymenoptera	1	10
Pocket Beach	2011-07-18	2011	3	Cercopidae	Hemiptera	1	10
Pocket Beach	2011-07-18	2011	3	Throscidae	Coleoptera	1	10
Pocket Beach	2011-07-18	2011	3	Araneae	Arachnida	1	10
Pocket Beach	2011-07-18	2011	3	Ichneumonidae	Hymenoptera	1	10
Pocket Beach	2011-07-18	2011	3	Chironomidae	Diptera	2	20
Pocket Beach	2011-07-18	2011	3	Aphididae	Hemiptera	11	110	11 wingless
Pocket Beach	2011-07-18	2011	3	Acari	Acari	5	50
Pocket Beach	2011-07-18	2011	3	Entomobryidae	Collembola	51	510
Pocket Beach	2011-07-18	2011	3	Thysanoptera immature	Thysanoptera	1	10
Pocket Beach	2011-07-18	2011	4	Calliphoridae	Diptera	1	10
Pocket Beach	2011-07-18	2011	4	Cercopidae	Hemiptera	3	30
Pocket Beach	2011-07-18	2011	4	Sciaridae	Diptera	5	50
Pocket Beach	2011-07-18	2011	4	Aphididae	Hemiptera	5	50	4 wingless 1 winged
Pocket Beach	2011-07-18	2011	4	Anthocoridae	Hemiptera	1	10
Pocket Beach	2011-07-18	2011	4	Scelionidae	Hymenoptera	1	10
Pocket Beach	2011-07-18	2011	4	Ichneumonidae	Hymenoptera	1	10
Pocket Beach	2011-07-18	2011	4	Cecidomyiidae	Diptera	7	70
Pocket Beach	2011-07-18	2011	4	Cecidomyiidae larva	Diptera	1	10
Pocket Beach	2011-07-18	2011	4	Acari	Acari	9	90
Pocket Beach	2011-07-18	2011	4	Entomobryidae	Collembola	37	370
Pocket Beach	2011-07-18	2011	4	Thysanoptera immature	Thysanoptera	3	30
Pocket Beach	2011-07-18	2011	5	Elateridae	Coleoptera	1	10
Pocket Beach	2011-07-18	2011	5	Ichneumonidae	Hymenoptera	1	10
Pocket Beach	2011-07-18	2011	5	Phoridae	Diptera	5	50
Pocket Beach	2011-07-18	2011	5	Thripidae	Thysanoptera	2	20
Pocket Beach	2011-07-18	2011	5	Chironomidae	Diptera	1	10
Pocket Beach	2011-07-18	2011	5	Entomobryidae	Collembola	5	50
Pocket Beach	2011-07-18	2011	5	Thysanoptera immature	Thysanoptera	14	140
Pocket Beach	2011-07-18	2011	6	Calliphoridae	Diptera	1	10
Pocket Beach	2011-07-18	2011	6	Lepidoptera larva	Lepidoptera	1	10
Pocket Beach	2011-07-18	2011	6	Thripidae	Thysanoptera	2	20
Pocket Beach	2011-07-18	2011	6	Cicadellidae immature	Hemiptera	1	10
Pocket Beach	2011-07-18	2011	6	Aphelinidae	Hymenoptera	1	10
Pocket Beach	2011-07-18	2011	6	Proctotrupoidea	Hymenoptera	1	10
Pocket Beach	2011-07-18	2011	6	Mymaridae	Hymenoptera	1	10
Pocket Beach	2011-07-18	2011	6	Diapriidae	Hymenoptera	1	10
Pocket Beach	2011-07-18	2011	6	Chironomidae	Diptera	1	10
Pocket Beach	2011-07-18	2011	6	Acari	Acari	2	20
Pocket Beach	2011-07-18	2011	6	Entomobryidae	Collembola	14	140
Pocket Beach	2011-07-18	2011	6	Thysanoptera immature	Thysanoptera	1	10
Pocket Beach	2011-07-18	2011	7	Forficulidae	Dermaptera	1	10
Pocket Beach	2011-07-18	2011	7	Cercopidae	Hemiptera	3	30
Pocket Beach	2011-07-18	2011	7	Sciaridae	Diptera	2	20
Pocket Beach	2011-07-18	2011	7	Ichneumonidae	Hymenoptera	1	10
Pocket Beach	2011-07-18	2011	7	Cecidomyiidae	Diptera	1	10
Pocket Beach	2011-07-18	2011	7	Phoridae	Diptera	2	20
Pocket Beach	2011-07-18	2011	7	Aphididae	Hemiptera	8	80	7 wingless 1 winged
Pocket Beach	2011-07-18	2011	7	Cicadellidae immature	Hemiptera	1	10
Pocket Beach	2011-07-18	2011	7	Chironomidae	Diptera	3	30
Pocket Beach	2011-07-18	2011	7	Acari	Acari	6	60
Pocket Beach	2011-07-18	2011	7	Entomobryidae	Collembola	5	50
Pocket Beach	2011-07-18	2011	7	Thysanoptera immature	Thysanoptera	2	20
Vegetation Swath	2011-07-18	2011	1	Aphelinidae	Hymenoptera	1	10
Vegetation Swath	2011-07-18	2011	1	Cicadellidae	Hemiptera	4	40
Vegetation Swath	2011-07-18	2011	1	Coleoptera larva	Coleoptera	2	20
Vegetation Swath	2011-07-18	2011	1	Araneae	Arachnida	1	10
Vegetation Swath	2011-07-18	2011	1	Cercopidae	Hemiptera	4	40
Vegetation Swath	2011-07-18	2011	1	Ichneumonidae	Hymenoptera	2	20
Vegetation Swath	2011-07-18	2011	1	Cicadellidae immature	Hemiptera	3	30
Vegetation Swath	2011-07-18	2011	1	Braconidae	Hymenoptera	1	10
Vegetation Swath	2011-07-18	2011	1	Cecidomyiidae	Diptera	3	30
Vegetation Swath	2011-07-18	2011	1	Gastropoda slug	Gastropoda	2	20
Vegetation Swath	2011-07-18	2011	1	Aphididae	Hemiptera	27	270	27 wingless
Vegetation Swath	2011-07-18	2011	1	Sminthuridae	Collembola	24	240
Vegetation Swath	2011-07-18	2011	1	Acari	Acari	62	620
Vegetation Swath	2011-07-18	2011	1	Thysanoptera immature	Thysanoptera	7	70
Vegetation Swath	2011-07-18	2011	1	Entomobryidae	Collembola	245	2450
Vegetation Swath	2011-07-18	2011	1	Thripidae	Thysanoptera	1	10
Vegetation Swath	2011-07-18	2011	1	Cecidomyiidae larva	Diptera	2	20
Vegetation Swath	2011-07-18	2011	1	Hypogastruridae	Collembola	3	30
Vegetation Swath	2011-07-18	2011	1	Megaspilidae	Hymenoptera	2	20
Vegetation Swath	2011-07-18	2011	1	Ceraphronidae	Hymenoptera	1	10
Vegetation Swath	2011-07-18	2011	1	Pteromalidae	Hymenoptera	1	10
Vegetation Swath	2011-07-18	2011	2	Ichneumonidae	Hymenoptera	1	10
Vegetation Swath	2011-07-18	2011	2	Auchenorrhyncha immature	Hemiptera	1	10
Vegetation Swath	2011-07-18	2011	2	Cicadellidae immature	Hemiptera	2	20
Vegetation Swath	2011-07-18	2011	2	Ceraphronidae	Hymenoptera	1	10
Vegetation Swath	2011-07-18	2011	2	Cicadellidae	Hemiptera	1	10
Vegetation Swath	2011-07-18	2011	2	Gastropoda slug	Gastropoda	1	10
Vegetation Swath	2011-07-18	2011	2	Cecidomyiidae	Diptera	2	20
Vegetation Swath	2011-07-18	2011	2	Thripidae	Thysanoptera	1	10
Vegetation Swath	2011-07-18	2011	2	Cercopidae	Hemiptera	1	10
Vegetation Swath	2011-07-18	2011	2	Aphididae	Hemiptera	26	260	25 wingless 1 winged
Vegetation Swath	2011-07-18	2011	2	Hemerobiidae larva	Neuroptera	1	10
Vegetation Swath	2011-07-18	2011	2	Coleoptera larva	Coleoptera	2	20
Vegetation Swath	2011-07-18	2011	2	Syrphidae larva	Diptera	1	10
Vegetation Swath	2011-07-18	2011	2	Drosophilidae	Diptera	1	10
Vegetation Swath	2011-07-18	2011	2	Sminthuridae	Collembola	29	290
Vegetation Swath	2011-07-18	2011	2	Acari	Acari	16	160
Vegetation Swath	2011-07-18	2011	2	Entomobryidae	Collembola	290	2900
Vegetation Swath	2011-07-18	2011	2	Thysanoptera immature	Thysanoptera	4	40
Vegetation Swath	2011-07-18	2011	3	Cicadellidae immature	Hemiptera	2	20	<10% of the sample was spilled before counting
Vegetation Swath	2011-07-18	2011	3	Symphyta larva	Hymenoptera	1	10	<10% of the sample was spilled before counting
Vegetation Swath	2011-07-18	2011	3	Cercopidae	Hemiptera	4	40	<10% of the sample was spilled before counting
Vegetation Swath	2011-07-18	2011	3	Dolichopodidae	Diptera	1	10	<10% of the sample was spilled before counting
Vegetation Swath	2011-07-18	2011	3	Araneae	Arachnida	1	10	<10% of the sample was spilled before counting
Vegetation Swath	2011-07-18	2011	3	Cecidomyiidae	Diptera	1	10	<10% of the sample was spilled before counting
Vegetation Swath	2011-07-18	2011	3	Ptiliidae	Coleoptera	1	10	<10% of the sample was spilled before counting
Vegetation Swath	2011-07-18	2011	3	Cicadellidae	Hemiptera	1	10	<10% of the sample was spilled before counting
Vegetation Swath	2011-07-18	2011	3	Ichneumonidae	Hymenoptera	1	10	<10% of the sample was spilled before counting
Vegetation Swath	2011-07-18	2011	3	Bibionidae	Diptera	1	10	<10% of the sample was spilled before counting
Vegetation Swath	2011-07-18	2011	3	Syrphidae larva	Diptera	1	10	<10% of the sample was spilled before counting
Vegetation Swath	2011-07-18	2011	3	Chironomidae	Diptera	1	10	<10% of the sample was spilled before counting
Vegetation Swath	2011-07-18	2011	3	Aphididae	Hemiptera	19	190	<10% of the sample was spilled before counting
Vegetation Swath	2011-07-18	2011	3	Sminthuridae	Collembola	356	3560	<10% of the sample was spilled before counting
Vegetation Swath	2011-07-18	2011	3	Acari	Acari	32	320	<10% of the sample was spilled before counting
Vegetation Swath	2011-07-18	2011	3	Entomobryidae	Collembola	480	4800	<10% of the sample was spilled before counting
Vegetation Swath	2011-07-18	2011	3	Thysanoptera immature	Thysanoptera	5	50	<10% of the sample was spilled before counting
Vegetation Swath	2011-07-18	2011	4	Araneae	Arachnida	2	20
Vegetation Swath	2011-07-18	2011	4	Cercopidae	Hemiptera	4	40
Vegetation Swath	2011-07-18	2011	4	Ichneumonidae	Hymenoptera	2	20
Vegetation Swath	2011-07-18	2011	4	Cecidomyiidae	Diptera	1	10
Vegetation Swath	2011-07-18	2011	4	Sciaridae	Diptera	1	10
Vegetation Swath	2011-07-18	2011	4	Ceraphronidae	Hymenoptera	3	30
Vegetation Swath	2011-07-18	2011	4	Cicadellidae immature	Hemiptera	1	10
Vegetation Swath	2011-07-18	2011	4	Braconidae	Hymenoptera	1	10
Vegetation Swath	2011-07-18	2011	4	Lepidoptera larva	Lepidoptera	1	10
Vegetation Swath	2011-07-18	2011	4	Chalcidoidea	Hymenoptera	1	10	antennae missing
Vegetation Swath	2011-07-18	2011	4	Chironomidae	Diptera	3	30
Vegetation Swath	2011-07-18	2011	4	Aphididae	Hemiptera	36	360	36 wingless
Vegetation Swath	2011-07-18	2011	4	Sminthuridae	Collembola	428	4280
Vegetation Swath	2011-07-18	2011	4	Acari	Acari	21	210
Vegetation Swath	2011-07-18	2011	4	Entomobryidae	Collembola	148	1480
Vegetation Swath	2011-07-18	2011	4	Thysanoptera immature	Thysanoptera	6	60
Vegetation Swath	2011-07-18	2011	5	Cercopidae	Hemiptera	5	50
Vegetation Swath	2011-07-18	2011	5	Cicadellidae	Hemiptera	2	20
Vegetation Swath	2011-07-18	2011	5	Staphylinidae	Coleoptera	2	20
Vegetation Swath	2011-07-18	2011	5	Dolichopodidae	Diptera	1	10
Vegetation Swath	2011-07-18	2011	5	Muscidae	Diptera	1	10
Vegetation Swath	2011-07-18	2011	5	Araneae	Arachnida	1	10
Vegetation Swath	2011-07-18	2011	5	Hemerobiidae larva	Neuroptera	1	10
Vegetation Swath	2011-07-18	2011	5	Cicadellidae immature	Hemiptera	6	60
Vegetation Swath	2011-07-18	2011	5	Cecidomyiidae	Diptera	1	10
Vegetation Swath	2011-07-18	2011	5	Aphididae	Hemiptera	32	320	29 wingless 3 winged
Vegetation Swath	2011-07-18	2011	5	Scelionidae	Hymenoptera	1	10
Vegetation Swath	2011-07-18	2011	5	Hypogastruridae	Collembola	3	30
Vegetation Swath	2011-07-18	2011	5	Thysanoptera immature	Thysanoptera	3	30
Vegetation Swath	2011-07-18	2011	5	Sminthuridae	Collembola	304	3040
Vegetation Swath	2011-07-18	2011	5	Acari	Acari	952	9520
Vegetation Swath	2011-07-18	2011	5	Entomobryidae	Collembola	152	1520
Vegetation Swath	2011-07-18	2011	6	Empididae	Diptera	1	10
Vegetation Swath	2011-07-18	2011	6	Cicadellidae	Hemiptera	1	10
Vegetation Swath	2011-07-18	2011	6	Cercopidae	Hemiptera	1	10
Vegetation Swath	2011-07-18	2011	6	Cicadellidae immature	Hemiptera	2	20
Vegetation Swath	2011-07-18	2011	6	Braconidae	Hymenoptera	2	20
Vegetation Swath	2011-07-18	2011	6	Phoridae	Diptera	1	10
Vegetation Swath	2011-07-18	2011	6	Sciaridae	Diptera	1	10
Vegetation Swath	2011-07-18	2011	6	Lepidoptera	Lepidoptera	1	10
Vegetation Swath	2011-07-18	2011	6	Cecidomyiidae	Diptera	2	20
Vegetation Swath	2011-07-18	2011	6	Aphididae	Hemiptera	20	200	17 wingless 3 winged
Vegetation Swath	2011-07-18	2011	6	Sminthuridae	Collembola	353	3530
Vegetation Swath	2011-07-18	2011	6	Acari	Acari	82	820
Vegetation Swath	2011-07-18	2011	6	Entomobryidae	Collembola	62	620
Vegetation Swath	2011-07-18	2011	6	Thysanoptera immature	Thysanoptera	11	110
Vegetation Swath	2011-07-18	2011	7	Cercopidae	Hemiptera	1	10
Vegetation Swath	2011-07-18	2011	7	Cicadellidae	Hemiptera	3	30
Vegetation Swath	2011-07-18	2011	7	Throscidae	Coleoptera	1	10
Vegetation Swath	2011-07-18	2011	7	Cecidomyiidae	Diptera	1	10
Vegetation Swath	2011-07-18	2011	7	Muscidae	Diptera	1	10
Vegetation Swath	2011-07-18	2011	7	Gastropoda slug	Gastropoda	1	10
Vegetation Swath	2011-07-18	2011	7	Thripidae	Thysanoptera	1	10
Vegetation Swath	2011-07-18	2011	7	Ichneumonidae	Hymenoptera	1	10
Vegetation Swath	2011-07-18	2011	7	Sphaeroceridae	Diptera	1	10
Vegetation Swath	2011-07-18	2011	7	Aphididae	Hemiptera	35	350	33 wingless 2 winged
Vegetation Swath	2011-07-18	2011	7	Sciaridae	Diptera	1	10
Vegetation Swath	2011-07-18	2011	7	Drosophilidae	Diptera	1	10
Vegetation Swath	2011-07-18	2011	7	Sminthuridae	Collembola	149	1490
Vegetation Swath	2011-07-18	2011	7	Acari	Acari	76	760
Vegetation Swath	2011-07-18	2011	7	Entomobryidae	Collembola	169	1690
Vegetation Swath	2011-07-18	2011	7	Hypogastruridae	Collembola	11	110
Vegetation Swath	2011-07-18	2011	7	Thysanoptera immature	Thysanoptera	5	50
RipRap	2005-04-14	2005	1	Chironomidae	Diptera	118	1180	small insect traps, 40 x 25 cm, or 0.1 m2
RipRap	2005-04-14	2005	1	Dryomyzidae	Diptera	1	10
RipRap	2005-04-14	2005	1	Lepismatidae	Thysanura	1	10		133
RipRap	2005-04-14	2005	2	Chironomidae	Diptera	208	2080
RipRap	2005-04-14	2005	2	Acari	Acari	1	10
RipRap	2005-04-14	2005	2	Isotomidae	Collembola	1	10
RipRap	2005-04-14	2005	2	Tethinidae	Diptera	1	10
RipRap	2005-04-14	2005	3	Chironomidae	Diptera	73	730
RipRap	2005-04-14	2005	3	Dryomyzidae	Diptera	1	10
RipRap	2005-04-14	2005	3	Sphaeroceridae	Diptera	2	20
RipRap	2005-04-14	2005	4	Chironomidae	Diptera	246	2460
RipRap	2005-04-14	2005	4	Dryomyzidae	Diptera	2	20
RipRap	2005-04-14	2005	4	Tethinidae	Diptera	4	40
RipRap	2005-04-14	2005	5	Chironomidae	Diptera	105	1050
RipRap	2005-04-14	2005	5	Formicidae	Hymenoptera	1	10
RipRap	2005-04-14	2005	5	Tethinidae	Diptera	1	10
RipRap	2005-04-14	2005	6	Chironomidae	Diptera	82	820
RipRap	2005-04-14	2005	6	Dryomyzidae	Diptera	1	10
RipRap	2005-04-14	2005	7	Tipulidae	Diptera	1	10
RipRap	2005-04-14	2005	7	Chironomidae	Diptera	210	2100
RipRap	2005-04-14	2005	7	Psocoptera	Psocoptera	1	10
RipRap PB	2005-04-14	2005	1	Chironomidae	Diptera	35	350
RipRap PB	2005-04-14	2005	1	Acari	Acari	1	10
RipRap PB	2005-04-14	2005	2	Chironomidae	Diptera	138	1380
RipRap PB	2005-04-14	2005	2	Traskorchestia sp.	Amphipoda	16	160
RipRap PB	2005-04-14	2005	2	Dryomyzidae	Diptera	1	10
RipRap PB	2005-04-14	2005	3	Dryomyzidae	Diptera	8	80
RipRap PB	2005-04-14	2005	3	Chironomidae	Diptera	148	1480
RipRap PB	2005-04-14	2005	3	Acari	Acari	3	30
RipRap PB	2005-04-14	2005	3	Dolichopodidae	Diptera	1	10
RipRap PB	2005-04-14	2005	4	Chironomidae	Diptera	175	1750
RipRap PB	2005-04-14	2005	4	Dryomyzidae	Diptera	7	70
RipRap PB	2005-04-14	2005	4	Tipulidae	Diptera	1	10
RipRap PB	2005-04-14	2005	5	Tipulidae	Diptera	1	10
RipRap PB	2005-04-14	2005	5	Chironomidae	Diptera	372	3720
RipRap PB	2005-04-14	2005	5	Isotomidae	Collembola	2	20
RipRap PB	2005-04-14	2005	5	Dryomyzidae	Diptera	8	80
RipRap PB	2005-04-14	2005	5	Dolichopodidae	Diptera	2	20
RipRap PB	2005-04-14	2005	6	Acari	Acari	11	110
RipRap PB	2005-04-14	2005	6	Chironomidae	Diptera	241	2410
RipRap PB	2005-04-14	2005	6	Dryomyzidae	Diptera	2	20
RipRap PB	2005-04-14	2005	6	Traskorchestia sp.	Amphipoda	1	10
RipRap PB	2005-04-14	2005	6	Isotomidae	Collembola	1	10
RipRap PB	2005-04-14	2005	7	Dryomyzidae	Diptera	8	80
RipRap PB	2005-04-14	2005	7	Chironomidae	Diptera	200	2000
RipRap PB	2005-04-14	2005	7	Tipulidae	Diptera	1	10
RipRap PB	2005-04-14	2005	7	Dolichopodidae	Diptera	1	10
RipRap PB	2005-04-14	2005	7	Acari	Acari	2	20
Riparian	2005-04-14	2005	1	Chironomidae	Diptera	6	60
Riparian	2005-04-14	2005	1	Psocoptera	Psocoptera	1	10
Riparian	2005-04-14	2005	1	Psocoptera	Psocoptera	1	10
Riparian	2005-04-14	2005	1	Acari	Acari	2	20
Riparian	2005-04-14	2005	2	Chironomidae	Diptera	10	100
Riparian	2005-04-14	2005	2	Psocoptera	Psocoptera	1	10
Riparian	2005-04-14	2005	2	Acari	Acari	3	30
Riparian	2005-04-14	2005	2	Hypogastruridae	Collembola	2	20
Riparian	2005-04-14	2005	3	Tipulidae	Diptera	1	10
Riparian	2005-04-14	2005	3	Chironomidae	Diptera	6	60
Riparian	2005-04-14	2005	3	Psilidae	Diptera	1	10
Riparian	2005-04-14	2005	3	Acari	Acari	4	40
Riparian	2005-04-14	2005	3	Hypogastruridae	Collembola	1	10
Riparian	2005-04-14	2005	3	Sciaridae	Diptera	3	30
Riparian	2005-04-14	2005	3	Psocoptera	Psocoptera	2	20
Riparian	2005-04-14	2005	3	Proctotrupidae	Hymenoptera	1	10
Riparian	2005-04-14	2005	4	Calliphoridae	Diptera	1	10
Riparian	2005-04-14	2005	4	Chironomidae	Diptera	18	180
Riparian	2005-04-14	2005	4	Psychodidae	Diptera	1	10
Riparian	2005-04-14	2005	4	Aphididae	Hemiptera	1	10
Riparian	2005-04-14	2005	4	Sciaridae	Diptera	3	30
Riparian	2005-04-14	2005	4	Tipulidae	Diptera	1	10
Riparian	2005-04-14	2005	4	Acari	Acari	6	60
Riparian	2005-04-14	2005	4	Hypogastruridae	Collembola	1	10
Riparian	2005-04-14	2005	4	Isotomidae	Collembola	1	10
Riparian	2005-04-14	2005	4	Cecidomyiidae	Diptera	1	10
Riparian	2005-04-14	2005	4	Psocoptera	Psocoptera	2	20
Riparian	2005-04-14	2005	6	Chironomidae	Diptera	14	140
Riparian	2005-04-14	2005	6	Psocoptera	Psocoptera	1	10
Riparian	2005-04-14	2005	6	Hypogastruridae	Collembola	5	50
Riparian	2005-04-14	2005	6	Araneae	Arachnida	1	10
Riparian	2005-04-14	2005	6	Sciaridae	Diptera	2	20
Riparian	2005-04-14	2005	6	Tipulidae	Diptera	1	10
Riparian	2005-04-14	2005	6	Acari	Acari	5	50
Riparian	2005-04-14	2005	7	Chironomidae	Diptera	3	30
Riparian	2005-04-14	2005	7	Hypogastruridae	Collembola	4	40
Riparian	2005-04-14	2005	7	Acari	Acari	4	40
Riparian	2005-04-14	2005	7	Psocoptera	Psocoptera	1	10
Riparian	2005-04-14	2005	7	Psocoptera	Psocoptera	1	10
Riparian	2005-04-14	2005	7	Sciaridae	Diptera	2	20
Riparian	2005-04-14	2005	7	Isotomidae	Collembola	1	10
Riparian	2005-04-14	2005	7	Anthomyiidae	Diptera	1	10
Seawall	2005-04-14	2005	1	Chironomidae	Diptera	57	570
Seawall	2005-04-14	2005	1	Sminthuridae	Collembola	1	10
Seawall	2005-04-14	2005	1	Hypogastruridae	Collembola	1	10
Seawall	2005-04-14	2005	1	Hemiptera immature	Hemiptera	1	10
Seawall	2005-04-14	2005	1	Proctotrupidae	Hymenoptera	2	20
Seawall	2005-04-14	2005	2	Chironomidae	Diptera	68	680
Seawall	2005-04-14	2005	2	Sciaridae	Diptera	1	10
Seawall	2005-04-14	2005	3	Chironomidae	Diptera	40	400
Seawall	2005-04-14	2005	4	Chironomidae	Diptera	40	400
Seawall	2005-04-14	2005	5	Chironomidae	Diptera	33	330
Seawall	2005-04-14	2005	6	Chironomidae	Diptera	31	310
Seawall	2005-04-14	2005	6	Aphididae	Hemiptera	1	10
Seawall	2005-04-14	2005	7	Chironomidae	Diptera	41	410
Seawall VS	2005-04-14	2005	1	Chironomidae	Diptera	48	480
Seawall VS	2005-04-14	2005	1	Isotomidae	Collembola	1	10
Seawall VS	2005-04-14	2005	2	Chironomidae	Diptera	68	680
Seawall VS	2005-04-14	2005	3	Chironomidae	Diptera	69	690
Seawall VS	2005-04-14	2005	3	Psychodidae	Diptera	1	10
Seawall VS	2005-04-14	2005	3	Ephydridae	Diptera	1	10
Seawall VS	2005-04-14	2005	4	Chironomidae	Diptera	73	730
Seawall VS	2005-04-14	2005	4	Aphididae	Hemiptera	1	10
Seawall VS	2005-04-14	2005	5	Chironomidae	Diptera	37	370
Seawall VS	2005-04-14	2005	5	Isotomidae	Collembola	1	10
Seawall VS	2005-04-14	2005	5	Sminthuridae	Collembola	1	10
Seawall VS	2005-04-14	2005	6	Chironomidae	Diptera	67	670
Seawall VS	2005-04-14	2005	6	Mycetophilidae	Diptera	1	10
Seawall VS	2005-04-14	2005	7	Chironomidae	Diptera	68	680
Seawall VS	2005-04-14	2005	7	Mymaridae	Hymenoptera	1	10
RipRap	2005-04-29	2005	1	Tipulidae	Diptera	1	10
RipRap	2005-04-29	2005	1	Araneae	Arachnida	2	20
RipRap	2005-04-29	2005	1	Isotomidae	Collembola	1	10
RipRap	2005-04-29	2005	1	Aphididae	Hemiptera	1	10
RipRap	2005-04-29	2005	1	Sciaridae	Diptera	1	10
RipRap	2005-04-29	2005	1	Scathophagidae	Diptera	1	10
RipRap	2005-04-29	2005	2	Araneae	Arachnida	1	10
RipRap	2005-04-29	2005	2	Chironomidae	Diptera	3	30
RipRap	2005-04-29	2005	2	Psychodidae	Diptera	1	10
RipRap	2005-04-29	2005	2	Isotomidae	Collembola	1	10
RipRap	2005-04-29	2005	2	Psocoptera	Psocoptera	1	10
RipRap	2005-04-29	2005	3	Chironomidae	Diptera	14	140
RipRap	2005-04-29	2005	3	Hemiptera immature	Hemiptera	1	10
RipRap	2005-04-29	2005	4	Tethinidae	Diptera	1	10
RipRap	2005-04-29	2005	4	Chironomidae	Diptera	24	240
RipRap	2005-04-29	2005	6	Chironomidae	Diptera	9	90
RipRap	2005-04-29	2005	6	Acari	Acari	5	50
RipRap	2005-04-29	2005	7	Formicidae	Hymenoptera	1	10
RipRap	2005-04-29	2005	7	Chironomidae	Diptera	19	190
RipRap	2005-04-29	2005	7	Acari	Acari	1	10
RipRap	2005-04-29	2005	7	Sciaridae	Diptera	1	10
RipRap	2005-04-29	2005	7	Ceratopogonidae	Diptera	1	10
RipRap	2005-04-29	2005	7	Isotomidae	Collembola	7	70
RipRap PB	2005-04-29	2005	2	Traskorchestia sp.	Amphipoda	1	10
RipRap PB	2005-04-29	2005	2	Dolichopodidae	Diptera	1	10
RipRap PB	2005-04-29	2005	2	Chironomidae	Diptera	5	50
RipRap PB	2005-04-29	2005	2	Ephydridae	Diptera	1	10
RipRap PB	2005-04-29	2005	3	Dolichopodidae	Diptera	3	30
RipRap PB	2005-04-29	2005	3	Traskorchestia sp.	Amphipoda	1	10
RipRap PB	2005-04-29	2005	3	Chironomidae	Diptera	12	120
RipRap PB	2005-04-29	2005	3	Gastropoda snail	Gastropoda	1	10
RipRap PB	2005-04-29	2005	3	Dryomyzidae	Diptera	2	20		121
RipRap PB	2005-04-29	2005	3	Acari	Acari	4	40
RipRap PB	2005-04-29	2005	3	Isotomidae	Collembola	10	100
RipRap PB	2005-04-29	2005	3	Psychodidae	Diptera	1	10
RipRap PB	2005-04-29	2005	3	Thripidae	Thysanoptera	1	10
RipRap PB	2005-04-29	2005	4	Acari	Acari	11	110
RipRap PB	2005-04-29	2005	4	Isotomidae	Collembola	4	40
RipRap PB	2005-04-29	2005	4	Traskorchestia sp.	Amphipoda	8	80
RipRap PB	2005-04-29	2005	4	Psychodidae	Diptera	1	10
RipRap PB	2005-04-29	2005	4	Chironomidae	Diptera	5	50
RipRap PB	2005-04-29	2005	5	Tipulidae	Diptera	1	10
RipRap PB	2005-04-29	2005	5	Dryomyzidae	Diptera	1	10
RipRap PB	2005-04-29	2005	5	Chironomidae	Diptera	4	40
RipRap PB	2005-04-29	2005	5	Acari	Acari	25	250
RipRap PB	2005-04-29	2005	5	Sminthuridae	Collembola	3	30
RipRap PB	2005-04-29	2005	5	Hypogastruridae	Collembola	1	10
RipRap PB	2005-04-29	2005	5	Mymaridae	Hymenoptera	1	10
RipRap PB	2005-04-29	2005	6	Isotomidae	Collembola	3	30
RipRap PB	2005-04-29	2005	6	Acari	Acari	11	110
RipRap PB	2005-04-29	2005	6	Sminthuridae	Collembola	2	20
RipRap PB	2005-04-29	2005	6	Dryomyzidae	Diptera	2	20
RipRap PB	2005-04-29	2005	6	Tethinidae	Diptera	1	10
RipRap PB	2005-04-29	2005	6	Chironomidae	Diptera	9	90
RipRap PB	2005-04-29	2005	6	Dolichopodidae	Diptera	1	10
RipRap PB	2005-04-29	2005	6	Platygasteridae	Hymenoptera	1	10
RipRap PB	2005-04-29	2005	6	Psychodidae	Diptera	1	10
RipRap PB	2005-04-29	2005	6	Traskorchestia sp.	Amphipoda	2	20
Riparian	2005-04-29	2005	1	Hypogastruridae	Collembola	65	650
Riparian	2005-04-29	2005	1	Acari	Acari	20	200
Riparian	2005-04-29	2005	1	Isotomidae	Collembola	11	110
Riparian	2005-04-29	2005	1	Aphididae	Hemiptera	2	20
Riparian	2005-04-29	2005	1	Braconidae	Hymenoptera	3	30
Riparian	2005-04-29	2005	1	Psocoptera	Psocoptera	2	20
Riparian	2005-04-29	2005	1	Psocoptera	Psocoptera	3	30
Riparian	2005-04-29	2005	1	Hemiptera immature	Hemiptera	1	10
Riparian	2005-04-29	2005	1	Hemiptera immature	Hemiptera	1	10
Riparian	2005-04-29	2005	1	Sciaridae	Diptera	3	30
Riparian	2005-04-29	2005	1	Chironomidae	Diptera	1	10
Riparian	2005-04-29	2005	2	Aphididae	Hemiptera	5	50
Riparian	2005-04-29	2005	2	Calliphoridae	Diptera	1	10
Riparian	2005-04-29	2005	2	Anthomyiidae	Diptera	1	10
Riparian	2005-04-29	2005	2	Ichneumonidae	Hymenoptera	1	10
Riparian	2005-04-29	2005	2	Chironomidae	Diptera	8	80
Riparian	2005-04-29	2005	2	Hemerobiidae	Neuroptera	1	10
Riparian	2005-04-29	2005	2	Coccinellidae	Coleoptera	1	10
Riparian	2005-04-29	2005	2	Thripidae	Thysanoptera	1	10
Riparian	2005-04-29	2005	2	Psocoptera	Psocoptera	1	10
Riparian	2005-04-29	2005	2	Psocoptera	Psocoptera	1	10
Riparian	2005-04-29	2005	2	Platygasteridae	Hymenoptera	1	10
Riparian	2005-04-29	2005	2	Hypogastruridae	Collembola	73	730
Riparian	2005-04-29	2005	2	Acari	Acari	20	200
Riparian	2005-04-29	2005	3	Carabidae	Coleoptera	1	10		122
Riparian	2005-04-29	2005	3	Hypogastruridae	Collembola	109	1090
Riparian	2005-04-29	2005	3	Acari	Acari	17	170
Riparian	2005-04-29	2005	3	Isotomidae	Collembola	4	40
Riparian	2005-04-29	2005	3	Calliphoridae	Diptera	3	30
Riparian	2005-04-29	2005	3	Psychodidae	Diptera	2	20
Riparian	2005-04-29	2005	3	Phoridae	Diptera	1	10
Riparian	2005-04-29	2005	3	Chironomidae	Diptera	8	80
Riparian	2005-04-29	2005	3	Aphididae	Hemiptera	2	20
Riparian	2005-04-29	2005	3	Sciaridae	Diptera	5	50
Riparian	2005-04-29	2005	3	Braconidae	Hymenoptera	1	10
Riparian	2005-04-29	2005	4	Hypogastruridae	Collembola	379	3790
Riparian	2005-04-29	2005	4	Acari	Acari	8	80
Riparian	2005-04-29	2005	4	Pseudoscorpiones	Arachnida	1	10
Riparian	2005-04-29	2005	4	Psocoptera	Psocoptera	2	20
Riparian	2005-04-29	2005	4	Psocoptera	Psocoptera	4	40
Riparian	2005-04-29	2005	4	Aphididae	Hemiptera	4	40
Riparian	2005-04-29	2005	4	Sciaridae	Diptera	11	110
Riparian	2005-04-29	2005	4	Braconidae	Hymenoptera	1	10
Riparian	2005-04-29	2005	4	Ichneumonidae	Hymenoptera	1	10
Riparian	2005-04-29	2005	4	Megaspilidae	Hymenoptera	2	20
Riparian	2005-04-29	2005	4	Proctotrupidae	Hymenoptera	1	10
Riparian	2005-04-29	2005	4	Hemiptera immature	Hemiptera	1	10
Riparian	2005-04-29	2005	4	Mymaridae	Hymenoptera	1	10
Riparian	2005-04-29	2005	4	Muscidae	Diptera	1	10
Riparian	2005-04-29	2005	4	Calliphoridae	Diptera	1	10
Riparian	2005-04-29	2005	4	Chironomidae	Diptera	8	80
Riparian	2005-04-29	2005	5	Hypogastruridae	Collembola	210	2100
Riparian	2005-04-29	2005	5	Acari	Acari	24	240
Riparian	2005-04-29	2005	5	Isotomidae	Collembola	2	20
Riparian	2005-04-29	2005	5	Aphididae	Hemiptera	2	20
Riparian	2005-04-29	2005	5	Sphaeroceridae	Diptera	1	10
Riparian	2005-04-29	2005	5	Psocoptera	Psocoptera	1	10
Riparian	2005-04-29	2005	5	Psocoptera	Psocoptera	5	50
Riparian	2005-04-29	2005	5	Chironomidae	Diptera	8	80
Riparian	2005-04-29	2005	5	Sciaridae	Diptera	5	50
Riparian	2005-04-29	2005	5	Psychodidae	Diptera	1	10
Riparian	2005-04-29	2005	5	Ichneumonidae	Hymenoptera	1	10
Riparian	2005-04-29	2005	5	Proctotrupidae	Hymenoptera	1	10
Riparian	2005-04-29	2005	6	Hypogastruridae	Collembola	153	1530
Riparian	2005-04-29	2005	6	Acari	Acari	58	580
Riparian	2005-04-29	2005	6	Sminthuridae	Collembola	2	20
Riparian	2005-04-29	2005	6	Isotomidae	Collembola	1	10
Riparian	2005-04-29	2005	6	Chironomidae	Diptera	6	60
Riparian	2005-04-29	2005	6	Psocoptera	Psocoptera	1	10
Riparian	2005-04-29	2005	6	Psocoptera	Psocoptera	4	40
Riparian	2005-04-29	2005	6	Sciaridae	Diptera	3	30
Riparian	2005-04-29	2005	6	Muscidae	Diptera	2	20
Riparian	2005-04-29	2005	6	Aphididae	Hemiptera	2	20
Riparian	2005-04-29	2005	6	Thripidae	Thysanoptera	1	10
Riparian	2005-04-29	2005	6	Platygasteridae	Hymenoptera	1	10
Riparian	2005-04-29	2005	6	Chloropidae	Diptera	1	10
Riparian	2005-04-29	2005	7	Hypogastruridae	Collembola	92	920
Riparian	2005-04-29	2005	7	Acari	Acari	27	270
Riparian	2005-04-29	2005	7	Isotomidae	Collembola	1	10
Riparian	2005-04-29	2005	7	Lepidoptera	Lepidoptera	3	30
Riparian	2005-04-29	2005	7	Psychodidae	Diptera	2	20
Riparian	2005-04-29	2005	7	Sciaridae	Diptera	7	70
Riparian	2005-04-29	2005	7	Chironomidae	Diptera	4	40
Riparian	2005-04-29	2005	7	Psocoptera	Psocoptera	1	10
Riparian	2005-04-29	2005	7	Proctotrupoidea	Hymenoptera	1	10
Seawall	2005-04-29	2005	1	Aphididae	Hemiptera	1	10
Seawall	2005-04-29	2005	1	Chironomidae	Diptera	2	20
Seawall	2005-04-29	2005	1	Psychodidae	Diptera	1	10
Seawall	2005-04-29	2005	2	Psocoptera	Psocoptera	2	20
Seawall	2005-04-29	2005	2	Chironomidae	Diptera	5	50
Seawall	2005-04-29	2005	2	Staphylinidae	Coleoptera	1	10
Seawall	2005-04-29	2005	2	Acari	Acari	2	20
Seawall	2005-04-29	2005	2	Psychodidae	Diptera	2	20
Seawall	2005-04-29	2005	3	Psocoptera	Psocoptera	1	10
Seawall	2005-04-29	2005	3	Chironomidae	Diptera	10	100
Seawall	2005-04-29	2005	3	Sciaridae	Diptera	1	10
Seawall	2005-04-29	2005	4	Chironomidae	Diptera	8	80
Seawall	2005-04-29	2005	4	Aphididae	Hemiptera	1	10
Seawall	2005-04-29	2005	4	Ceratopogonidae	Diptera	1	10
Seawall	2005-04-29	2005	4	Psychodidae	Diptera	1	10
Seawall	2005-04-29	2005	5	Chironomidae	Diptera	2	20
Seawall	2005-04-29	2005	5	Acari	Acari	1	10
Seawall	2005-04-29	2005	5	Sciaridae	Diptera	2	20
Seawall	2005-04-29	2005	5	Aphididae	Hemiptera	1	10
Seawall	2005-04-29	2005	5	Scelionidae	Hymenoptera	1	10
Seawall	2005-04-29	2005	6	Sciaridae	Diptera	1	10
Seawall	2005-04-29	2005	6	Mycetophilidae	Diptera	1	10
Seawall	2005-04-29	2005	6	Chironomidae	Diptera	1	10
Seawall	2005-04-29	2005	6	Psychodidae	Diptera	1	10
Seawall	2005-04-29	2005	7	Chironomidae	Diptera	8	80
Seawall	2005-04-29	2005	7	Isotomidae	Collembola	1	10
Seawall VS	2005-04-29	2005	1	Formicidae	Hymenoptera	1	10
Seawall VS	2005-04-29	2005	1	Ceratopogonidae	Diptera	1	10
Seawall VS	2005-04-29	2005	1	Chironomidae	Diptera	11	110
Seawall VS	2005-04-29	2005	2	Sciaridae	Diptera	1	10
Seawall VS	2005-04-29	2005	2	Acari	Acari	2	20
Seawall VS	2005-04-29	2005	2	Psychodidae	Diptera	1	10
Seawall VS	2005-04-29	2005	2	Chironomidae	Diptera	10	100
Seawall VS	2005-04-29	2005	3	Psychodidae	Diptera	1	10
Seawall VS	2005-04-29	2005	3	Chironomidae	Diptera	9	90
Seawall VS	2005-04-29	2005	3	Apidae	Hymenoptera	1	10
Seawall VS	2005-04-29	2005	3	Isotomidae	Collembola	1	10
Seawall VS	2005-04-29	2005	3	Cecidomyiidae	Diptera	2	20
Seawall VS	2005-04-29	2005	4	Aphididae	Hemiptera	1	10
Seawall VS	2005-04-29	2005	4	Chironomidae	Diptera	8	80
Seawall VS	2005-04-29	2005	4	Cecidomyiidae	Diptera	1	10
Seawall VS	2005-04-29	2005	5	Chironomidae	Diptera	2	20
Seawall VS	2005-04-29	2005	5	Araneae	Arachnida	1	10
Seawall VS	2005-04-29	2005	5	Psychodidae	Diptera	2	20
Seawall VS	2005-04-29	2005	5	Ceratopogonidae	Diptera	2	20
Seawall VS	2005-04-29	2005	5	Scelionidae	Hymenoptera	1	10
Seawall VS	2005-04-29	2005	6	Sciaridae	Diptera	1	10
Seawall VS	2005-04-29	2005	6	Chironomidae	Diptera	8	80
Seawall VS	2005-04-29	2005	6	Acalypterate	Diptera	1	10	like Piophilidae	115
Seawall VS	2005-04-29	2005	7	Psocoptera	Psocoptera	1	10
Seawall VS	2005-04-29	2005	7	Hypogastruridae	Collembola	1	10
Seawall VS	2005-04-29	2005	7	Chironomidae	Diptera	9	90
Seawall VS	2005-04-29	2005	7	Acari	Acari	2	20
Seawall VS	2005-04-29	2005	7	Cecidomyiidae	Diptera	2	20
Seawall VS	2005-04-29	2005	7	Sciaridae	Diptera	1	10
Seawall VS	2005-04-29	2005	7	Tethinidae	Diptera	1	10		116
RipRap	2005-05-12	2005	1	Ephydridae	Diptera	1	10
RipRap	2005-05-12	2005	1	Acari	Acari	3	30
RipRap	2005-05-12	2005	1	Encyrtidae	Hymenoptera	1	10
RipRap	2005-05-12	2005	2	Thripidae	Thysanoptera	1	10
RipRap	2005-05-12	2005	2	Chironomidae	Diptera	1	10
RipRap	2005-05-12	2005	2	Sminthuridae	Collembola	1	10
RipRap	2005-05-12	2005	2	Isotomidae	Collembola	2	20
RipRap	2005-05-12	2005	3	Formicidae	Hymenoptera	1	10
RipRap	2005-05-12	2005	3	Chironomidae	Diptera	1	10
RipRap	2005-05-12	2005	3	Araneae	Arachnida	1	10
RipRap	2005-05-12	2005	3	Acari	Acari	1	10
RipRap	2005-05-12	2005	3	Isotomidae	Collembola	6	60
RipRap	2005-05-12	2005	4	Thripidae	Thysanoptera	1	10
RipRap	2005-05-12	2005	4	Chironomidae	Diptera	1	10
RipRap	2005-05-12	2005	5	Acari	Acari	2	20
RipRap	2005-05-12	2005	5	Chironomidae	Diptera	4	40
RipRap	2005-05-12	2005	5	Isotomidae	Collembola	2	20
RipRap	2005-05-12	2005	6	Acari	Acari	5	50
RipRap	2005-05-12	2005	6	Chironomidae	Diptera	4	40
RipRap	2005-05-12	2005	7	Psocoptera	Psocoptera	1	10
RipRap	2005-05-12	2005	7	Araneae	Arachnida	1	10
RipRap	2005-05-12	2005	7	Chironomidae	Diptera	4	40
RipRap	2005-05-12	2005	7	Acari	Acari	3	30
RipRap PB	2005-05-12	2005	1	Aphididae	Hemiptera	2	20
RipRap PB	2005-05-12	2005	1	Chironomidae	Diptera	6	60
RipRap PB	2005-05-12	2005	1	Acari	Acari	1	10
RipRap PB	2005-05-12	2005	1	Talitridae	Amphipoda	1	10	too small to have jumped in
RipRap PB	2005-05-12	2005	1	Calliphoridae	Diptera	1	10
RipRap PB	2005-05-12	2005	2	Talitridae	Amphipoda	10	100
RipRap PB	2005-05-12	2005	2	Traskorchestia sp.	Amphipoda	1	10
RipRap PB	2005-05-12	2005	2	Chironomidae	Diptera	6	60
RipRap PB	2005-05-12	2005	2	Isotomidae	Collembola	1	10
RipRap PB	2005-05-12	2005	2	Psychodidae	Diptera	1	10
RipRap PB	2005-05-12	2005	2	Acari	Acari	6	60
RipRap PB	2005-05-12	2005	2	Hypogastruridae	Collembola	3	30
RipRap PB	2005-05-12	2005	2	Muscidae	Diptera	1	10
RipRap PB	2005-05-12	2005	2	Proctotrupidae	Hymenoptera	1	10
RipRap PB	2005-05-12	2005	3	Araneae	Arachnida	1	10
RipRap PB	2005-05-12	2005	3	Chironomidae	Diptera	1	10
RipRap PB	2005-05-12	2005	3	Isotomidae	Collembola	3	30
RipRap PB	2005-05-12	2005	3	Talitridae	Amphipoda	3	30
RipRap PB	2005-05-12	2005	4	Traskorchestia sp.	Amphipoda	2	20	also did not count many tiny Talitridae too small to have jumped in
RipRap PB	2005-05-12	2005	4	Chironomidae	Diptera	4	40
RipRap PB	2005-05-12	2005	4	Hypogastruridae	Collembola	3	30
RipRap PB	2005-05-12	2005	5	Acari	Acari	7	70
RipRap PB	2005-05-12	2005	5	Chironomidae	Diptera	1	10
RipRap PB	2005-05-12	2005	5	Hypogastruridae	Collembola	1	10
RipRap PB	2005-05-12	2005	5	Anthocoridae	Hemiptera	1	10
RipRap PB	2005-05-12	2005	5	Thripidae	Thysanoptera	1	10
RipRap PB	2005-05-12	2005	5	Dryomyzidae	Diptera	1	10
RipRap PB	2005-05-12	2005	6	Calliphoridae	Diptera	1	10
RipRap PB	2005-05-12	2005	6	Cecidomyiidae	Diptera	1	10
RipRap PB	2005-05-12	2005	6	Araneae	Arachnida	1	10
RipRap PB	2005-05-12	2005	6	Tethinidae	Diptera	1	10
RipRap PB	2005-05-12	2005	6	Sphaeroceridae	Diptera	1	10
[truncated: 4,482 more rows]

## Sheet: vlookup
Taxa	Taxa Group	Ecology
Acalypterate	Diptera	Terrestrial riparian
Acalypterate Muscoid	Diptera	Terrestrial riparian
Acanthocyclops robustus	Cyclopoid	Benthic/Epibenthic/Algae
Acanthomysis aspera	Mysidacea	Planktonic/Neritic
Acari	Acari	Terrestrial riparian
Acrenhydrosoma sp	Harpacticoida	Benthic/Epibenthic/Algae
Acroperus sp	Cladocera	Benthic/Epibenthic/Algae
Adelgidae	Hemiptera	Terrestrial riparian
Aeolothripidae	Thysanoptera	Terrestrial riparian
Aetidius divergens	Calanoida	Planktonic/Neritic
Aetidius sp	Calanoida	Planktonic/Neritic
Agromyzidae	Diptera	Terrestrial riparian
Alderia modesta	Sacoglossa	Benthic/Epibenthic/Algae
Aleyrodidae	Hemiptera	Terrestrial riparian
Allorchestes angusta	Amphipoda	Benthic/Epibenthic/Algae
Allorchestes sp	Amphipoda	Benthic/Epibenthic/Algae
Allorchestes sp juvenile	Amphipoda	Benthic/Epibenthic/Algae
Alona sp 1	Cladocera	Benthic/Epibenthic/Algae
Alona sp 2	Cladocera	Benthic/Epibenthic/Algae
Alticinae	Coleoptera	Terrestrial riparian
Alvania compacta	Gastropoda	Benthic/Epibenthic/Algae
Ameira longipes	Harpacticoida	Benthic/Epibenthic/Algae
Ameira sp	Harpacticoida	Benthic/Epibenthic/Algae
Ameiridae	Harpacticoida	Benthic/Epibenthic/Algae
Americhelidium rectipalmum	Amphipoda	Benthic/Epibenthic/Algae
Americhelidium shoemakeri	Amphipoda	Benthic/Epibenthic/Algae
Americorophium salmonis	Amphipoda	Benthic/Epibenthic/Algae
Americorophium sp Juvenile	Amphipoda	Benthic/Epibenthic/Algae
Americorophium spinicorne	Amphipoda	Benthic/Epibenthic/Algae
Amonardia normani	Harpacticoida	Benthic/Epibenthic/Algae
Amonardia perturbata	Harpacticoida	Benthic/Epibenthic/Algae
Ampelisca abdita	Amphipoda	Benthic/Epibenthic/Algae
Amphiasciodes sp A	Harpacticoida	Benthic/Epibenthic/Algae
Amphiascoides sp	Harpacticoida	Benthic/Epibenthic/Algae
Amphiascoides sp A	Harpacticoida	Benthic/Epibenthic/Algae
Amphiascopsis cinctus	Harpacticoida	Benthic/Epibenthic/Algae
Amphiascopsis sp copepodid	Harpacticoida	Benthic/Epibenthic/Algae
Amphiascus minutus	Harpacticoida	Benthic/Epibenthic/Algae
Amphiascus sp	Harpacticoida	Benthic/Epibenthic/Algae
Amphiascus urdosus	Harpacticoida	Benthic/Epibenthic/Algae
Amphipod parts	Amphipoda	Benthic/Epibenthic/Algae
Amphipoda	Amphipoda	Benthic/Epibenthic/Algae
Amphipoda Juvenile	Amphipoda	Benthic/Epibenthic/Algae
Amphithoe sp	Amphipoda	Benthic/Epibenthic/Algae
Ampithoe sp	Amphipoda	Benthic/Epibenthic/Algae
Ancorabolidae	Harpacticoida	Benthic/Epibenthic/Algae
Andrenidae	Hymenoptera	Terrestrial riparian
Anisogammarus sp	Amphipoda	Benthic/Epibenthic/Algae
Anisopodidae	Diptera	Terrestrial riparian
Annelida	Annelida	Benthic/Epibenthic/Algae
Anomura	Decapoda	Benthic/Epibenthic/Algae
Anthicidae	Coleoptera	Terrestrial riparian
Anthocoridae	Hemiptera	Terrestrial riparian
Anthomyiidae	Diptera	Terrestrial riparian
Anthomyzidae	Diptera	Terrestrial riparian
Anthozoa	Anthozoa	Benthic/Epibenthic/Algae
Anthribidae	Coleoptera	Terrestrial riparian
Aoroides columbiae	Amphipoda	Benthic/Epibenthic/Algae
Aoroides exilis	Amphipoda	Benthic/Epibenthic/Algae
Aoroides sp	Amphipoda	Benthic/Epibenthic/Algae
Aoroides sp juvenile	Amphipoda	Benthic/Epibenthic/Algae
Aphelinidae	Hymenoptera	Terrestrial riparian
Aphididae	Hemiptera	Terrestrial riparian
Aphididae nymph	Hemiptera	Terrestrial riparian
Aphidoidea	Hemiptera	Terrestrial riparian
Aphidoidea nymph	Hemiptera	Terrestrial riparian
Apidae	Hymenoptera	Terrestrial riparian
Apoidea	Hymenoptera	Terrestrial riparian
Araneae	Arachnida	Terrestrial riparian
Armandia brevis	Polychaeta	Benthic/Epibenthic/Algae
Armandia sp	Polychaeta	Benthic/Epibenthic/Algae
Arthropleona	Collembola	Terrestrial riparian
Asilidae	Diptera	Terrestrial riparian
Asteiidae	Diptera	Terrestrial riparian
Athericidae	Diptera	Terrestrial riparian
Auchenorrhyncha immature	Hemiptera	Terrestrial riparian
Baetidae	Ephemeroptera	Benthic/Epibenthic/Algae
Baetidae immature	Ephemeroptera	Benthic/Epibenthic/Algae
Balanomorpha	Cirripedia	Benthic/Epibenthic/Algae
Bethylidae	Hymenoptera	Terrestrial riparian
Bivalvia	Gastropoda	Benthic/Epibenthic/Algae
Bosmina sp	Cladocera	Benthic/Epibenthic/Algae
Bostrichidae	Coleoptera	Terrestrial riparian
Brachycera	Diptera	Terrestrial riparian
Brachycera larva	Diptera	Benthic/Epibenthic/Algae
Brachycera pupa	Diptera	Benthic/Epibenthic/Algae
Brachyura	Decapoda	Benthic/Epibenthic/Algae
Brachyuran parts	Decapoda	Benthic/Epibenthic/Algae
Braconidae	Hymenoptera	Terrestrial riparian
Bulbamphiascus sp	Harpacticoida	Benthic/Epibenthic/Algae
Caecidotea sp	Isopoda	Benthic/Epibenthic/Algae
Caenidae juvenile	Ephemeroptera	Benthic/Epibenthic/Algae
Caenis sp	Ephemeroptera	Terrestrial riparian
Calanoida	Calanoida	Planktonic/Neritic
Calanus pacificus	Calanoida	Planktonic/Neritic
Calanus sp	Calanoida	Planktonic/Neritic
Calliopiidae	Amphipoda	Benthic/Epibenthic/Algae
Calliopiidae juvenile	Amphipoda	Benthic/Epibenthic/Algae
Calliopius carinatus	Amphipoda	Benthic/Epibenthic/Algae
Calliopius sp	Amphipoda	Benthic/Epibenthic/Algae
Calliphoridae	Diptera	Terrestrial riparian
Camillidae	Diptera	Terrestrial riparian
Camptocercus sp	Cladocera	Benthic/Epibenthic/Algae
Canacidae	Diptera	Terrestrial riparian
Cancer sp	Decapoda	Benthic/Epibenthic/Algae
Cancridae	Decapoda	Benthic/Epibenthic/Algae
Candona sp	Ostracoda	Benthic/Epibenthic/Algae
Canthocamptus oregonensis	Harpacticoida	Benthic/Epibenthic/Algae
Capitella capitata	Polychaeta	Benthic/Epibenthic/Algae
Capitellidae	Polychaeta	Benthic/Epibenthic/Algae
Caprella laeviuscula	Amphipoda	Benthic/Epibenthic/Algae
Caprella sp	Amphipoda	Benthic/Epibenthic/Algae
Caprellidae juvenile	Amphipoda	Benthic/Epibenthic/Algae
Carabidae	Coleoptera	Terrestrial riparian
Caridea	Decapoda	Benthic/Epibenthic/Algae
Carnidae	Diptera	Terrestrial riparian
Cecidomyiidae	Diptera	Terrestrial riparian
Cecidomyiidae larva	Diptera	Terrestrial riparian
Centropages abdominalis	Calanoida	Planktonic/Neritic
Ceraphronidae	Hymenoptera	Terrestrial riparian
Ceraphronoidea	Hymenoptera	Terrestrial riparian
Ceratopogonidae	Diptera	Terrestrial riparian
Ceratopogonidae larva	Diptera	Benthic/Epibenthic/Algae
Ceratopogonidae pupa	Diptera	Benthic/Epibenthic/Algae
Cercopidae	Hemiptera	Terrestrial riparian
Cercopidae immature	Hemiptera	Terrestrial riparian
Chaetognath	Chaetognatha	Planktonic/Neritic
Chalcididae	Hymenoptera	Terrestrial riparian
Chalcidoidea	Hymenoptera	Terrestrial riparian
Chalcidoidea, wingless	Hymenoptera	Terrestrial riparian
Chamaemyiidae	Diptera	Terrestrial riparian
Chaoboridae	Diptera	Terrestrial riparian
Chilopoda	Chilopoda	Terrestrial riparian
Chironomidae	Diptera	Terrestrial riparian
Chironomidae larva	Diptera	Benthic/Epibenthic/Algae
Chironomidae pupa	Diptera	Benthic/Epibenthic/Algae
Chloropidae	Diptera	Terrestrial riparian
Chrysididae	Hymenoptera	Terrestrial riparian
Chrysidoidea	Hymenoptera	Terrestrial riparian
Chrysomelidae	Coleoptera	Terrestrial riparian
Chrysopidae	Neuroptera	Terrestrial riparian
Chrysopidae larva	Neuroptera	Terrestrial riparian
Chydorus sp	Cladocera	Benthic/Epibenthic/Algae
Chyromyidae	Diptera	Terrestrial riparian
Cicadellidae	Hemiptera	Terrestrial riparian
Cicadellidae immature	Hemiptera	Terrestrial riparian
Cicadellidae nymph	Hemiptera	Terrestrial riparian
Cimbicidae	Hymenoptera	Terrestrial riparian
Cirripedia	Cirripedia	Benthic/Epibenthic/Algae
Cirripedia cyprid	Cirripedia	Planktonic/Neritic
Cirripedia exuvia	Cirripedia	Planktonic/Neritic
Cirripedia nauplii	Cirripedia	Planktonic/Neritic
Cixiidae	Hemiptera	Terrestrial riparian
Cixiidae immature	Hemiptera	Terrestrial riparian
Cladocera	Cladocera	Benthic/Epibenthic/Algae
Cladoceran ephippium	Cladocera	Planktonic/Neritic
Clausidiidae	Poecilostomatoida	Benthic/Epibenthic/Algae
Clausidiidae copepodid	Harpacticoida	Benthic/Epibenthic/Algae
Cletodidae	Harpacticoida	Benthic/Epibenthic/Algae
Clusiidae	Diptera	Terrestrial riparian
Coccinellidae	Coleoptera	Terrestrial riparian
Coccinellidae larva	Coleoptera	Terrestrial riparian
Coccoidea	Hemiptera	Terrestrial riparian
Coccoidea (female)	Hemiptera	Terrestrial riparian
Coccoidea (male)	Hemiptera	Terrestrial riparian
Coelopidae	Diptera	Terrestrial riparian
Coenagrionidae	Odonata	Terrestrial riparian
Coenagrionidae immature	Odonata	Benthic/Epibenthic/Algae
Coleoptera	Coleoptera	Terrestrial riparian
Coleoptera larva	Coleoptera	Terrestrial riparian
Coleoptera pupa	Coleoptera	Terrestrial riparian
Collembola	Collembola	Terrestrial riparian
Colletidae	Hymenoptera	Terrestrial riparian
Colydiidae	Coleoptera	Terrestrial riparian
Coniopterygidae	Neuroptera	Terrestrial riparian
Corixidae	Hemiptera	Planktonic/Neritic
Corixidae immature	Hemiptera	Planktonic/Neritic
Corixidae nymph	Hemiptera	Planktonic/Neritic
Corophiidae juvenile	Amphipoda	Benthic/Epibenthic/Algae
Corophium salmonis	Amphipoda	Benthic/Epibenthic/Algae
Corophium sp	Amphipoda	Benthic/Epibenthic/Algae
Corophium sp juvenile	Amphipoda	Benthic/Epibenthic/Algae
Corophium spinicorne	Amphipoda	Benthic/Epibenthic/Algae
Corycaeus anglicus	Calanoida	Planktonic/Neritic
Corycaeus sp	Calanoida	Planktonic/Neritic
Corylophidae	Coleoptera	Terrestrial riparian
Coullana canadensis	Harpacticoida	Benthic/Epibenthic/Algae
Crangonyx sp	Amphipoda	Benthic/Epibenthic/Algae
Cryptophagidae	Coleoptera	Terrestrial riparian
Culicidae	Diptera	Terrestrial riparian
Cumacea	Cumacea	Planktonic/Neritic
Cumacean	Cumacea	Planktonic/Neritic
Cumella vulgaris	Cumacea	Benthic/Epibenthic/Algae
Curculionidae	Coleoptera	Terrestrial riparian
Cyclocypria kincaidia	Ostracoda	Benthic/Epibenthic/Algae
Cyclocypris sp	Ostracoda	Benthic/Epibenthic/Algae
Cyclopoid copepodid	Cyclopoid	Benthic/Epibenthic/Algae
Cyclopoid nauplii	Cyclopoid	Benthic/Epibenthic/Algae
Cyclopoida	Cyclopoid	Benthic/Epibenthic/Algae
Cynipidae	Hymenoptera	Terrestrial riparian
Cynipoidea	Hymenoptera	Terrestrial riparian
Dactylopusia cf glacialis	Harpacticoida	Benthic/Epibenthic/Algae
Dactylopusia crassipes	Harpacticoida	Benthic/Epibenthic/Algae
Dactylopusia paratisboides	Harpacticoida	Benthic/Epibenthic/Algae
Dactylopusia sp	Harpacticoida	Benthic/Epibenthic/Algae
Dactylopusia sp copepodid	Harpacticoida	Benthic/Epibenthic/Algae
Dactylopusia vulgaris	Harpacticoida	Benthic/Epibenthic/Algae
Danielssenia typica	Harpacticoida	Benthic/Epibenthic/Algae
Daphnia pulicaria	Cladocera	Planktonic/Neritic
Daphnia sp	Cladocera	Planktonic/Neritic
Decapoda	Decapoda	Benthic/Epibenthic/Algae
Delphacidae	Hemiptera	Terrestrial riparian
Delphacidae immature	Hemiptera	Terrestrial riparian
Delphacidae nymph	Hemiptera	Terrestrial riparian
Dermaptera	Dermaptera	Terrestrial riparian
Dermaptera nymph	Dermaptera	Terrestrial riparian
Desdimelita desdichada	Amphipoda	Benthic/Epibenthic/Algae
Desdimelita sp	Amphipoda	Benthic/Epibenthic/Algae
Desdimellita californica	Amphipoda	Benthic/Epibenthic/Algae
Desdimellita sp juvenile	Amphipoda	Benthic/Epibenthic/Algae
Desmoscolecina	Nematoda	Benthic/Epibenthic/Algae
Desmoscolicina	Nematoda	Benthic/Epibenthic/Algae
Diapriidae	Hymenoptera	Terrestrial riparian
Diarthrodes sp	Harpacticoida	Benthic/Epibenthic/Algae
Diastylopsis sp	Mysidacea	Planktonic/Neritic
Diosaccus spinatus	Harpacticoida	Benthic/Epibenthic/Algae
Diplopoda	Diplopoda	Terrestrial riparian
Diptera	Diptera	Terrestrial riparian
Diptera larva	Diptera	Terrestrial riparian
Diptera pupa	Diptera	Terrestrial riparian
Dixidae larva	Diptera	Benthic/Epibenthic/Algae
Dolichopodidae	Diptera	Terrestrial riparian
Dolichopodidae larva	Diptera	Benthic/Epibenthic/Algae
Dolichopodidae pupa	Diptera	Benthic/Epibenthic/Algae
Dolichurini	Hymenoptera	Terrestrial riparian
Donacia sp	Coleoptera	Terrestrial riparian
Drosophilidae	Diptera	Terrestrial riparian
Dryomyzidae	Diptera	Terrestrial riparian
Dulichia sp	Amphipoda	Benthic/Epibenthic/Algae
Dynamenella glabra	Isopoda	Benthic/Epibenthic/Algae
Dynamenella sheareri	Isopoda	Benthic/Epibenthic/Algae
Dytiscidae	Coleoptera	Benthic/Epibenthic/Algae
Echinolaophonte sp	Harpacticoida	Benthic/Epibenthic/Algae
Ectinosomatidae	Harpacticoida	Benthic/Epibenthic/Algae
Egg case	Egg	Benthic/Epibenthic/Algae
Egg Case (oligochaeta)	Egg	Benthic/Epibenthic/Algae
Eggs	Egg	Benthic/Epibenthic/Algae
Elateridae	Coleoptera	Terrestrial riparian
Elmidae	Coleoptera	Benthic/Epibenthic/Algae
Empididae	Diptera	Terrestrial riparian
Empididae larva	Diptera	Benthic/Epibenthic/Algae
Encyrtidae	Hymenoptera	Terrestrial riparian
Enhydrosoma sp	Harpacticoida	Benthic/Epibenthic/Algae
Entomobryidae	Collembola	Terrestrial riparian
Eogammarus confervicolus	Amphipoda	Benthic/Epibenthic/Algae
Eogammarus sp	Amphipoda	Benthic/Epibenthic/Algae
Eogammarus sp juvenile	Amphipoda	Benthic/Epibenthic/Algae
Ephemerellidae	Ephemeroptera	Benthic/Epibenthic/Algae
Ephemeroptera immature	Ephemeroptera	Benthic/Epibenthic/Algae
Ephemeroptera nymph	Ephemeroptera	Benthic/Epibenthic/Algae
Ephydridae	Diptera	Terrestrial riparian
Ephydridae larva	Diptera	Terrestrial riparian
Ephydridae pupa	Diptera	Benthic/Epibenthic/Algae
Epicaridea	Isopoda	Benthic/Epibenthic/Algae
Epilabidocera longipedata	Calanoida	Planktonic/Neritic
Erotylidae	Coleoptera	Terrestrial riparian
Erpobdellidae	Hirudinea	Benthic/Epibenthic/Algae
Eualis pusiolus	Decapoda	Benthic/Epibenthic/Algae
Eualis subtilis	Decapoda	Benthic/Epibenthic/Algae
Eucoilidae	Hymenoptera	Terrestrial riparian
Eucyclops sp	Cyclopoid	Benthic/Epibenthic/Algae
Eudorella pacifica	Cumacea	Benthic/Epibenthic/Algae
Eulalia quadrioculata	Polychaeta	Benthic/Epibenthic/Algae
Eulophidae	Hymenoptera	Terrestrial riparian
Eupelmidae	Hymenoptera	Terrestrial riparian
Euphausiacea	Euphausiacea	Planktonic/Neritic
Euphilomedes carcharodonta	Ostracoda	Benthic/Epibenthic/Algae
Euphilomedes producta	Ostracoda	Benthic/Epibenthic/Algae
Eurycercus sp	Cladocera	Benthic/Epibenthic/Algae
Eurylophella lodi	Ephemeroptera	Benthic/Epibenthic/Algae
Eurytemora sp	Calanoida	Planktonic/Neritic
Eurytomidae	Hymenoptera	Terrestrial riparian
Evadne sp	Cladocera	Planktonic/Neritic
Exosphaeroma inornata	Isopoda	Benthic/Epibenthic/Algae
Fabricia sp	Polychaeta	Benthic/Epibenthic/Algae
Ferrissia sp	Gastropoda	Benthic/Epibenthic/Algae
Fish	Fish	Planktonic/Neritic
Fish larva	Fish	Planktonic/Neritic
Foraminifera	Foraminifera	Benthic/Epibenthic/Algae
Forcipomyiinae larva	Diptera	Terrestrial riparian
Forficulidae	Dermaptera	Terrestrial riparian
Formicidae	Hymenoptera	Terrestrial riparian
Foxiphalus similis	Amphipoda	Benthic/Epibenthic/Algae
Foxocephalidae juvenile	Amphipoda	Benthic/Epibenthic/Algae
Gammaridea	Amphipoda	Benthic/Epibenthic/Algae
Gammaridea juvenile	Amphipoda	Benthic/Epibenthic/Algae
Gastropoda	Gastropoda	Benthic/Epibenthic/Algae
Gastropoda juvenile	Gastropoda	Benthic/Epibenthic/Algae
Gastropoda slug	Gastropoda	Benthic/Epibenthic/Algae
Gastropoda snail	Gastropoda	Terrestrial riparian
Gastropoda snail juvenile	Gastropoda	Benthic/Epibenthic/Algae
Geometridae	Lepidoptera	Terrestrial riparian
Geometridae larva	Lepidoptera	Terrestrial riparian
Geophilomorpha	Chilopoda	Terrestrial riparian
Glyceridae juvenile	Polychaeta	Benthic/Epibenthic/Algae
Gnorimosphaeroma insulare	Isopoda	Benthic/Epibenthic/Algae
Gnorimosphaeroma oregonense	Isopoda	Benthic/Epibenthic/Algae
Gnorimosphaeroma sp juvenile	Isopoda	Benthic/Epibenthic/Algae
Gomphidae immature	Odonata	Benthic/Epibenthic/Algae
Gonianidae	Polychaeta	Benthic/Epibenthic/Algae
Grandidierella japonica	Amphipoda	Benthic/Epibenthic/Algae
Grapsidae	Decapoda	Benthic/Epibenthic/Algae
Gryllacrididae nymph	Orthoptera	Terrestrial riparian
Halictidae	Hymenoptera	Terrestrial riparian
Halicyclops sp	Cyclopoid	Benthic/Epibenthic/Algae
Halticidae	Hymenoptera	Terrestrial riparian
Harpacticoid copepodid	Harpacticoida	Benthic/Epibenthic/Algae
Harpacticoid nauplii	Harpacticoida	Benthic/Epibenthic/Algae
Harpacticoida	Harpacticoida	Benthic/Epibenthic/Algae
Harpacticus compressus	Harpacticoida	Benthic/Epibenthic/Algae
Harpacticus obscurus group	Harpacticoida	Benthic/Epibenthic/Algae
Harpacticus septentrionalis	Harpacticoida	Benthic/Epibenthic/Algae
Harpacticus sp	Harpacticoida	Benthic/Epibenthic/Algae
Harpacticus sp A	Harpacticoida	Benthic/Epibenthic/Algae
Harpacticus sp copepodid	Harpacticoida	Benthic/Epibenthic/Algae
Harpacticus sp other	Harpacticoida	Benthic/Epibenthic/Algae
Harpacticus uniremis	Harpacticoida	Benthic/Epibenthic/Algae
Harpacticus uniremis group	Harpacticoida	Benthic/Epibenthic/Algae
Heleomyzidae	Diptera	Terrestrial riparian
Hemerobiidae	Neuroptera	Terrestrial riparian
Hemerobiidae larva	Neuroptera	Terrestrial riparian
Hemigrapsus sp	Decapoda	Benthic/Epibenthic/Algae
Hemiptera	Hemiptera	Terrestrial riparian
Hemiptera egg	Hemiptera	Terrestrial riparian
Hemiptera immature	Hemiptera	Terrestrial riparian
Hemiptera nymph	Hemiptera	Terrestrial riparian
Heptacarpus littoralis	Caridea	Benthic/Epibenthic/Algae
Heptacarpus sitchensis	Caridea	Benthic/Epibenthic/Algae
Hesionidae	Polychaeta	Benthic/Epibenthic/Algae
Heteroceridae	Coleoptera	Terrestrial riparian
Heterolaophonte discophora	Harpacticoida	Benthic/Epibenthic/Algae
Heterolaophonte longisetigera	Harpacticoida	Benthic/Epibenthic/Algae
Heterolaophonte sp	Harpacticoida	Benthic/Epibenthic/Algae
Heteroptera immature	Hemiptera	Terrestrial riparian
Hexatoma sp larva	Diptera	Terrestrial riparian
Histeridae	Coleoptera	Terrestrial riparian
Hobsonia florida	Polychaeta	Benthic/Epibenthic/Algae
Holmesimysis nudensis	Mysidacea	Planktonic/Neritic
Homoptera	Hemiptera	Terrestrial riparian
Homoptera immature	Hemiptera	Terrestrial riparian
Huntemannia jadensis	Harpacticoida	Benthic/Epibenthic/Algae
Hyalidae juvenile	Amphipoda	Benthic/Epibenthic/Algae
Hyallela sp	Amphipoda	Benthic/Epibenthic/Algae
Hydraenidae	Coleoptera	Terrestrial riparian
Hydroid	Hydrozoa	Benthic/Epibenthic/Algae
Hydrometridae	Hemiptera	Terrestrial riparian
Hydrophilidae	Coleoptera	Benthic/Epibenthic/Algae
Hydrophilidae larva	Coleoptera	Benthic/Epibenthic/Algae
Hydroptilidae	Trichoptera	Terrestrial riparian
Hydroptilidae larva	Trichoptera	Terrestrial riparian
Hydrozoa	Hydrozoa	Benthic/Epibenthic/Algae
Hymenoptera	Hymenoptera	Terrestrial riparian
Hymenoptera larva	Hymenoptera	Terrestrial riparian
Hymenoptera pupa	Hymenoptera	Terrestrial riparian
Hymenoptera, wingless	Hymenoptera	Terrestrial riparian
Hyperiidea	Amphipoda	Benthic/Epibenthic/Algae
Hyperiidea juvenile	Amphipoda	Benthic/Epibenthic/Algae
Hypogastruridae	Collembola	Terrestrial riparian
Ichneumonidae	Hymenoptera	Terrestrial riparian
Ichneumonoidea	Hymenoptera	Terrestrial riparian
Ichyrocercus anguipes	Amphipoda	Benthic/Epibenthic/Algae
Ichyrocerus anguipes	Amphipoda	Benthic/Epibenthic/Algae
Idomene purpurocincta	Harpacticoida	Benthic/Epibenthic/Algae
Idotea sp	Isopoda	Benthic/Epibenthic/Algae
Idotea sp juvenile	Isopoda	Benthic/Epibenthic/Algae
Idotea wosnesenskii	Isopoda	Benthic/Epibenthic/Algae
Idotea wosneseskii	Isopoda	Benthic/Epibenthic/Algae
Insect larva	Insecta	Terrestrial riparian
Insect nymph	Insecta	Terrestrial riparian
Insect parts	Insecta	Terrestrial riparian
Insect pupa	Insecta	Terrestrial riparian
Insecta	Insecta	Terrestrial riparian
Ischyrocerus sp	Amphipoda	Benthic/Epibenthic/Algae
Isopoda	Isopoda	Benthic/Epibenthic/Algae
Isotomidae	Collembola	Terrestrial riparian
Juvenile Sandlance	Perciformes	Planktonic/Neritic
Lampropidae	Cumacea	Benthic/Epibenthic/Algae
Lamprops sp	Cumacea	Benthic/Epibenthic/Algae
Lampyridae	Coleoptera	Terrestrial riparian
Laophonte cornuta	Harpacticoida	Benthic/Epibenthic/Algae
Laophonte elongata	Harpacticoida	Benthic/Epibenthic/Algae
Laophontidae	Harpacticoida	Benthic/Epibenthic/Algae
Laophontidae copepodid	Harpacticoida	Benthic/Epibenthic/Algae
Laophontodes sp	Harpacticoida	Benthic/Epibenthic/Algae
Larval Fish	Fish	Planktonic/Neritic
Latridiidae	Coleoptera	Terrestrial riparian
Lauxaniidae	Diptera	Terrestrial riparian
Leimia vaga	Harpacticoida	Benthic/Epibenthic/Algae
Leiodidae	Coleoptera	Terrestrial riparian
Lepidoptera	Lepidoptera	Terrestrial riparian
Lepidoptera larva	Lepidoptera	Terrestrial riparian
Lepidostomatidae larva	Trichoptera	Benthic/Epibenthic/Algae
Leptoceridae larva	Trichoptera	Benthic/Epibenthic/Algae
Leptochelia dubia	Tanaidacea	Benthic/Epibenthic/Algae
Leptopodidae nymph	Hemiptera	Terrestrial riparian
Ligia pallasii	Isopoda	Benthic/Epibenthic/Algae
Limnephilidae	Trichoptera	Terrestrial riparian
Limnephilidae larva	Trichoptera	Benthic/Epibenthic/Algae
Limnocythere sp	Ostracoda	Benthic/Epibenthic/Algae
Littorina scutellata eggcase	Gastropoda	Benthic/Epibenthic/Algae
Littorophiloscia richardsonae	Isopoda	Benthic/Epibenthic/Algae
Lonchaeidae	Diptera	Terrestrial riparian
Lonchopteridae	Diptera	Terrestrial riparian
Longipedia sp	Harpacticoida	Benthic/Epibenthic/Algae
Lottia digitalis	Gastropoda	Benthic/Epibenthic/Algae
Lottia sp	Gastropoda	Benthic/Epibenthic/Algae
Lygaeidae	Hemiptera	Terrestrial riparian
Lygaeidae nymph	Hemiptera	Terrestrial riparian
Lymnaeidae	Gastropoda	Benthic/Epibenthic/Algae
Macoma	Bivalvia	Benthic/Epibenthic/Algae
Macrocyclops albidus	Cyclopoid	Benthic/Epibenthic/Algae
Manayunkia aestuarina	Polychaeta	Benthic/Epibenthic/Algae
Manayunkia sp	Polychaeta	Benthic/Epibenthic/Algae
Megachilidae	Hymenoptera	Terrestrial riparian
Megalorchestia pugettensis	Amphipoda	Terrestrial riparian
Megamoera sp	Amphipoda	Benthic/Epibenthic/Algae
Megamoera subtener	Amphipoda	Benthic/Epibenthic/Algae
Megaspilidae	Hymenoptera	Terrestrial riparian
Melitidae juvenile	Amphipoda	Benthic/Epibenthic/Algae
Melyridae	Coleoptera	Terrestrial riparian
Mesochra pygmaea	Harpacticoida	Benthic/Epibenthic/Algae
Mesochra sp	Harpacticoida	Benthic/Epibenthic/Algae
Mesovellidae	Hemiptera	Terrestrial riparian
Mesovellidae immature	Hemiptera	Terrestrial riparian
Microlepidoptera	Lepidoptera	Terrestrial riparian
Micropezidae	Diptera	Terrestrial riparian
Microsetella sp	Harpacticoida	Benthic/Epibenthic/Algae
Miraciidae copepodid	Harpacticoida	Benthic/Epibenthic/Algae
Miridae	Hemiptera	Terrestrial riparian
Miridae immature	Hemiptera	Terrestrial riparian
Miridae nymph	Hemiptera	Terrestrial riparian
Monocorophium insidiosum	Amphipoda	Benthic/Epibenthic/Algae
Muscidae	Diptera	Terrestrial riparian
Muscidae larva	Diptera	Terrestrial riparian
Muscoidea	Diptera	Terrestrial riparian
Mycetophilidae	Diptera	Terrestrial riparian
Mymaridae	Hymenoptera	Terrestrial riparian
Mysidae	Mysidacea	Planktonic/Neritic
Mytilus juvenile	Gastropoda	Benthic/Epibenthic/Algae
Mytilus sp juvenile	Gastropoda	Benthic/Epibenthic/Algae
Nabidae	Hemiptera	Terrestrial riparian
Neanthes limnicola	Polychaeta	Benthic/Epibenthic/Algae
Nematocera	Diptera	Terrestrial riparian
Nematocera pupa	Diptera	Benthic/Epibenthic/Algae
Nematoda	Nematoda	Benthic/Epibenthic/Algae
Nemertea	Nemertea	Benthic/Epibenthic/Algae
Neomysis kadiakensis	Mysidacea	Planktonic/Neritic
Neomysis mercedis	Mysidacea	Planktonic/Neritic
Neomysis sp	Mysidacea	Planktonic/Neritic
Neotrypaea californiensis	Decapoda	Benthic/Epibenthic/Algae
Nereidae	Polychaeta	Benthic/Epibenthic/Algae
Nereidae juvenile	Polychaeta	Benthic/Epibenthic/Algae
Nerilla sp	Polychaeta	Benthic/Epibenthic/Algae
Neuroptera larva	Neuroptera	Terrestrial riparian
Nippoleucon hinumensis	Cumacea	Benthic/Epibenthic/Algae
Nitidulidae	Coleoptera	Terrestrial riparian
Nitocra sp	Harpacticoida	Benthic/Epibenthic/Algae
Noctuidae	Lepidoptera	Terrestrial riparian
Normanella sp	Harpacticoida	Benthic/Epibenthic/Algae
Notonectidae nymph	Hemiptera	Planktonic/Neritic
Odonata	Odonata	Terrestrial riparian
Oedemeridae	Coleoptera	Terrestrial riparian
Oligochaeta	Oligochaeta	Benthic/Epibenthic/Algae
Oligochinus lighti	Amphipoda	Benthic/Epibenthic/Algae
Oncaea sp	Calanoida	Planktonic/Neritic
Oniscoidea	Isopoda	Benthic/Epibenthic/Algae
Onychiuridae	Collembola	Terrestrial riparian
Onychiuridae	Collembola	Terrestrial riparian
Opheliidae	Polychaeta	Benthic/Epibenthic/Algae
Opiliones	Arachnida	Terrestrial riparian
Opomyzidae	Diptera	Terrestrial riparian
Orchesella	Collembola	Terrestrial riparian
Orthopsyllus illgi	Harpacticoida	Benthic/Epibenthic/Algae
Orthopsyllus sp	Harpacticoida	Benthic/Epibenthic/Algae
Ostracoda	Ostracoda	Benthic/Epibenthic/Algae
Otitidae	Diptera	Terrestrial riparian
Ottidae	Diptera	Terrestrial riparian
Pacifacanthomysis nephropthalma	Mysidacea	Planktonic/Neritic
Pacifasticus sp	Decapoda	Benthic/Epibenthic/Algae
Paguridae	Decapoda	Benthic/Epibenthic/Algae
Paguridae megalopa	Decapoda	Benthic/Epibenthic/Algae
Paleanotus bellis	Polychaeta	Benthic/Epibenthic/Algae
Paracalanus sp	Calanoida	Planktonic/Neritic
Paracalliopiella pratti	Amphipoda	Benthic/Epibenthic/Algae
Paracrenhydrosoma sp	Harpacticoida	Benthic/Epibenthic/Algae
Paradactylopodia sp	Harpacticoida	Benthic/Epibenthic/Algae
Paralaophonte pacifica	Harpacticoida	Benthic/Epibenthic/Algae
Paralaophonte perplexa group	Harpacticoida	Benthic/Epibenthic/Algae
Paralaophonte sp	Harpacticoida	Benthic/Epibenthic/Algae
Paramesochridae	Harpacticoida	Benthic/Epibenthic/Algae
Paramoera bousfieldi	Amphipoda	Benthic/Epibenthic/Algae
Paramoera mohri	Amphipoda	Benthic/Epibenthic/Algae
Paramoera sp	Amphipoda	Benthic/Epibenthic/Algae
Parastenhelia hornelli	Harpacticoida	Benthic/Epibenthic/Algae
Parastenhelia spinosa	Harpacticoida	Benthic/Epibenthic/Algae
Parathalestris californica	Harpacticoida	Benthic/Epibenthic/Algae
Parathalestris sp	Harpacticoida	Benthic/Epibenthic/Algae
Parathalestris sp copepodid	Harpacticoida	Benthic/Epibenthic/Algae
Pectinariidae	Polychaeta	Benthic/Epibenthic/Algae
Peltidiidae	Harpacticoida	Benthic/Epibenthic/Algae
Pentatomidae	Hemiptera	Terrestrial riparian
Perilampidae	Hymenoptera	Terrestrial riparian
Phalacridae	Coleoptera	Terrestrial riparian
Phlaeothripidae	Thysanoptera	Terrestrial riparian
Phlaeothripidae larva	Thysanoptera	Terrestrial riparian
Phlaeothripidae pupa	Thysanoptera	Terrestrial riparian
Pholoidae juvenile	Polychaeta	Benthic/Epibenthic/Algae
Phoridae	Diptera	Terrestrial riparian
Photis sp	Amphipoda	Benthic/Epibenthic/Algae
Photis sp juvenile	Amphipoda	Benthic/Epibenthic/Algae
Pinnotheridae	Decapoda	Benthic/Epibenthic/Algae
Piophilidae	Diptera	Terrestrial riparian
Pipunculidae	Diptera	Terrestrial riparian
Platygasteridae	Hymenoptera	Terrestrial riparian
Pleusirus secorrus	Amphipoda	Benthic/Epibenthic/Algae
Pleustidae juvenile	Amphipoda	Benthic/Epibenthic/Algae
Podon sp	Cladocera	Planktonic/Neritic
Polychaeta	Polychaeta	Benthic/Epibenthic/Algae
Polychaeta juvenile	Polychaeta	Benthic/Epibenthic/Algae
Polychaete juvenile	Polychaeta	Benthic/Epibenthic/Algae
Polydesmida	Diplopoda	Terrestrial riparian
Polydora giardi	Polychaeta	Benthic/Epibenthic/Algae
Polydora ligni	Polychaeta	Benthic/Epibenthic/Algae
Polydora sp	Polychaeta	Benthic/Epibenthic/Algae
Polynoidae	Polychaeta	Benthic/Epibenthic/Algae
Polynoidae juvenile	Polychaeta	Benthic/Epibenthic/Algae
Polyphemus sp	Cladocera	Planktonic/Neritic
Pompilidae	Hymenoptera	Terrestrial riparian
Pontogeneia cf ivanovi	Amphipoda	Benthic/Epibenthic/Algae
Pontogeneia rostrata	Amphipoda	Benthic/Epibenthic/Algae
Porcellidium sp	Harpacticoida	Benthic/Epibenthic/Algae
Porcellio scaber	Isopoda	Benthic/Epibenthic/Algae
Proctotrupidae	Hymenoptera	Terrestrial riparian
Proctotrupoidea	Hymenoptera	Terrestrial riparian
Proctotrupoidea (wingless)	Hymenoptera	Terrestrial riparian
Prostoma sp	Nemertea	Benthic/Epibenthic/Algae
Protohyale frequens	Amphipoda	Benthic/Epibenthic/Algae
Protohyale sp	Amphipoda	Benthic/Epibenthic/Algae
Protohyale sp juvenile	Amphipoda	Benthic/Epibenthic/Algae
Protura	Protura	Terrestrial riparian
Pseudobradya sp	Harpacticoida	Benthic/Epibenthic/Algae
Pseudocalanus sp	Calanoida	Planktonic/Neritic
Pseudopolydora kempi	Polychaeta	Benthic/Epibenthic/Algae
Pseudoscorpiones	Arachnida	Terrestrial riparian
Psilidae	Diptera	Terrestrial riparian
Psocoptera	Psocoptera	Terrestrial riparian
Psocoptera immature	Psocoptera	Terrestrial riparian
Psocoptera nymph	Psocoptera	Terrestrial riparian
Psychodidae	Diptera	Terrestrial riparian
Psychodidae larva	Diptera	Benthic/Epibenthic/Algae
Psychodidae pupa	Diptera	Benthic/Epibenthic/Algae
Psyllidae	Hemiptera	Terrestrial riparian
Psyllidae immature	Hemiptera	Terrestrial riparian
Pteromalidae	Hymenoptera	Terrestrial riparian
Ptiliidae	Coleoptera	Terrestrial riparian
Pygospio elegans	Polychaeta	Benthic/Epibenthic/Algae
Pyralidae	Lepidoptera	Terrestrial riparian
Pyrrhocoridae	Hemiptera	Terrestrial riparian
Pyrrhocoridae nymph	Hemiptera	Terrestrial riparian
Ramellogamarus sp	Amphipoda	Benthic/Epibenthic/Algae
Reduviidae	Hemiptera	Terrestrial riparian
Rhagionidae	Diptera	Terrestrial riparian
Rhagovelia sp	Hemiptera	Terrestrial riparian
Rhagovelia sp immature	Hemiptera	Terrestrial riparian
Rhinophoridae	Diptera	Terrestrial riparian
Rhizothrix sp	Harpacticoida	Benthic/Epibenthic/Algae
Rhynchothalestris helgolandica	Harpacticoida	Benthic/Epibenthic/Algae
Robertsonia cf knoxi	Harpacticoida	Benthic/Epibenthic/Algae
Rochefortia tumida	Bivalvia	Benthic/Epibenthic/Algae
Sabellidae	Polychaeta	Benthic/Epibenthic/Algae
Sabellidae juvenile	Polychaeta	Benthic/Epibenthic/Algae
Sacoglossa	Saccoglosa	Benthic/Epibenthic/Algae
Saldidae	Hemiptera	Terrestrial riparian
Saldidae nymph	Hemiptera	terrestrial riparian
Sapygidae	Hymenoptera	Terrestrial riparian
Sarcophagidae	Diptera	Terrestrial riparian
Scathophagidae	Diptera	Terrestrial riparian
Scatopsidae	Diptera	Terrestrial riparian
Scelionidae	Hymenoptera	Terrestrial riparian
Sciaridae	Diptera	Terrestrial riparian
Sciomyzidae	Diptera	Terrestrial riparian
Scolytidae	Coleoptera	Terrestrial riparian
Scutellidium sp	Harpacticoida	Benthic/Epibenthic/Algae
Sialidae	Neuroptera	Terrestrial riparian
Signiphoridae	Hymenoptera	Terrestrial riparian
Simuliidae	Diptera	Terrestrial riparian
Simuliidae larva	Diptera	Benthic/Epibenthic/Algae
Sinelobus stanfordi	Tanaidacea	Benthic/Epibenthic/Algae
Sminthuridae	Collembola	Terrestrial riparian
Snail	Gastropoda	Benthic/Epibenthic/Algae
Sphaeroceridae	Diptera	Terrestrial riparian
Sphaeromatidae juvenile	Amphipoda	Benthic/Epibenthic/Algae
Sphecidae	Hymenoptera	Terrestrial riparian
Spionidae	Polychaeta	Benthic/Epibenthic/Algae
Spionidae juvenile	Polychaeta	Benthic/Epibenthic/Algae
Staphylinidae	Coleoptera	Terrestrial riparian
Staphylinidae larva	Coleoptera	Terrestrial riparian
Stenus sp	Coleoptera	Terrestrial riparian
Stephos sp	Calanoida	Planktonic/Neritic
Sternorrhyncha immature	Hemiptera	Terrestrial riparian
Syllidae	Polychaeta	Benthic/Epibenthic/Algae
Syllidae juvenile	Polychaeta	Benthic/Epibenthic/Algae
Symphyla	Symphyla	Terrestrial riparian
Symphyta	Hymenoptera	Terrestrial riparian
Symphyta larva	Hymenoptera	Terrestrial riparian
Syrphidae	Diptera	Terrestrial riparian
Tabanidae	Diptera	Terrestrial riparian
Tabanidae larva	Diptera	Terrestrial riparian
Tachidius discipes	Harpacticoida	Benthic/Epibenthic/Algae
Tachinidae	Diptera	Terrestrial riparian
Talitridae	Amphipoda	Benthic/Epibenthic/Algae
Talitridae juvenile	Amphipoda	Terrestrial riparian
Tanaidacea	Tanaidacea	Benthic/Epibenthic/Algae
Tanaidae	Tanaidacea	Benthic/Epibenthic/Algae
Tardigrade	Tardigrade	Benthic/Epibenthic/Algae
Tegastidae	Harpacticoida	Benthic/Epibenthic/Algae
Tellinidae	Bivalvia	Benthic/Epibenthic/Algae
Tenthredinidae	Hymenoptera	Terrestrial riparian
Tenthredinidae larva	Hymenoptera	Terrestrial riparian
Tephritidae	Diptera	Terrestrial riparian
Terrestrial mollusc	Gastropoda	Terrestrial riparian
Tethinidae	Diptera	Terrestrial riparian
Tetrigidae	Orthoptera	Terrestrial riparian
Thalestridae copepodid	Harpacticoida	Benthic/Epibenthic/Algae
Thalestris sp	Harpacticoida	Benthic/Epibenthic/Algae
Themisto pacifica	Amphipoda	Benthic/Epibenthic/Algae
Therevidae	Diptera	Terrestrial riparian
Thripidae	Thysanoptera	Terrestrial riparian
Throscidae	Coleoptera	Terrestrial riparian
Thysanoptera	Thysanoptera	Terrestrial riparian
Thysanoptera immature	Thysanoptera	Terrestrial riparian
Thysanoptera larva	Thysanoptera	Terrestrial riparian
Tingidae	Hemiptera	Terrestrial riparian
Tipulidae	Diptera	Terrestrial riparian
Tipulidae larva	Diptera	Benthic/Epibenthic/Algae
Tipulidae pupa	Diptera	Benthic/Epibenthic/Algae
Tisbe sp	Harpacticoida	Benthic/Epibenthic/Algae
Torymidae	Hymenoptera	Terrestrial riparian
Traskorchestia georgiana	Amphipoda	Terrestrial riparian
Traskorchestia sp.	Amphipoda	Benthic/Epibenthic/Algae
Traskorchestia traskiana	Amphipoda	Benthic/Epibenthic/Algae
Traskorchestia traskiana, female	Amphipoda	Benthic/Epibenthic/Algae
Traskorchestia traskiana, male	Amphipoda	Benthic/Epibenthic/Algae
Trichogrammatidae	Hymenoptera	Terrestrial riparian
Trichoptera	Trichoptera	Terrestrial riparian
Trichoptera larva	Trichoptera	Benthic/Epibenthic/Algae
Turbellaria	Turbellaria	Benthic/Epibenthic/Algae
Typhlamphiascus pectinifer	Harpacticoida	Benthic/Epibenthic/Algae
Typhlamphiascus sp	Harpacticoida	Benthic/Epibenthic/Algae
Typosyllis caeca	Polychaeta	Benthic/Epibenthic/Algae
Unidentified harpacticoid copepodid	Harpacticoida	Benthic/Epibenthic/Algae
Uromunna ubiquita	Isopoda	Benthic/Epibenthic/Algae
Veliidae	Hemiptera	Terrestrial riparian
Vespidae	Hymenoptera	Terrestrial riparian
Worm unknown	Annelida	Benthic/Epibenthic/Algae
Zaus sp	Harpacticoida	Benthic/Epibenthic/Algae
