# Supplementary material for: Quantifying the effectiveness of shoreline armoring removal on coastal biota of Puget Sound
Source: PeerJ. 2018 Feb 23;6:e4275. doi: 10.7717/peerj.4275 (PMC5825941; doi:10.7717/peerj.4275)
Supplement: Supplemental Information 7 — Dataset of invertebrates sampled before and after shoreline armoring removal at two different locations (removed in 2005 and 2014 respectively) in Seahurst Park. [file peerj-06-4275-s007.xls]

## Sheet: Seahurst data
Site	elevation	Date	Month	Year	Rep.	Taxa	Number	Density	course taxa	Taxa Grouping	notes
Reference	5	2004-06-03	June	2004	1	Oligochaeta	57	7257.45	Oligochaeta	Oligochaeta	to get density per m2, divide by 0.007854
Reference	5	2004-06-03	June	2004	1	Polychaete	1	127.324	Polychaete, unk.	Polychaete	juv.
Reference	5	2004-06-03	June	2004	1	Nematoda	1	127.324	Nematoda	Nematoda
Reference	5	2004-06-03	June	2004	1	Gnorimosphaeroma oregonense	9	1145.91	Aquatic Isopod	Aquatic crustacean
Reference	5	2004-06-03	June	2004	1	Nereidae	1	127.324	Nereidae	Polychaete	juv.
Reference	5	2004-06-03	June	2004	1	Eogammarus confervicolus	14	1782.53	Aquatic Amphipod	Aquatic crustacean
Reference	5	2004-06-03	June	2004	1	Amphipod, juv.	12	1527.88	Aquatic Amphipod	Aquatic crustacean
Reference	5	2004-06-03	June	2004	1	Clam, juv.	1	127.324	Bivalve	Mollusk
Reference	5	2004-06-03	June	2004	1	Paramoera sp.	3	381.971	Aquatic Amphipod	Aquatic crustacean
Reference	5	2004-06-03	June	2004	2	Oligochaeta	84	10695.2	Oligochaeta	Oligochaeta
Reference	5	2004-06-03	June	2004	2	Amphipod, juv.	24	3055.77	Aquatic Amphipod	Aquatic crustacean
Reference	5	2004-06-03	June	2004	2	Eogammarus confervicolus	32	4074.36	Aquatic Amphipod	Aquatic crustacean
Reference	5	2004-06-03	June	2004	2	Gnorimosphaeroma oregonense	5	636.618	Aquatic Isopod	Aquatic crustacean
Reference	5	2004-06-03	June	2004	2	Huntemannia jadensis	1	127.324	Harpacticoid	Aquatic crustacean
Reference	5	2004-06-03	June	2004	2	Nematoda	1	127.324	Nematoda	Nematoda
Reference	5	2004-06-03	June	2004	2	Turbellaria	1	127.324	Turbellaria	Nemertea/Turbellaria
Reference	5	2004-06-03	June	2004	2	Hemigrapsus oregonensis	1	127.324	Crab	Aquatic crustacean
Reference	5	2004-06-03	June	2004	2	Nereidae	1	127.324	Nereidae	Polychaete	juv.
Reference	5	2004-06-03	June	2004	3	Hemigrapsus oregonensis	1	127.324	Crab	Aquatic crustacean
Reference	5	2004-06-03	June	2004	3	Oligochaeta	34	4329	Oligochaeta	Oligochaeta
Reference	5	2004-06-03	June	2004	3	Nematoda	3	381.971	Nematoda	Nematoda
Reference	5	2004-06-03	June	2004	3	Amphipod, juv.	8	1018.59	Aquatic Amphipod	Aquatic crustacean
Reference	5	2004-06-03	June	2004	3	Eogammarus confervicolus	9	1145.91	Aquatic Amphipod	Aquatic crustacean
Reference	5	2004-06-03	June	2004	3	Gnorimosphaeroma oregonense	1	127.324	Aquatic Isopod	Aquatic crustacean
Reference	5	2004-06-03	June	2004	3	Diptera pupae	1	127.324	Insect larvae	Insect, Arachnid, Collembola
Reference	5	2004-06-03	June	2004	3	Clam, juv.	1	127.324	Bivalve	Mollusk
Reference	5	2004-06-03	June	2004	3	Ostracoda	1	127.324	Ostracoda	Aquatic crustacean
Reference	5	2004-06-03	June	2004	4	Gnorimosphaeroma oregonense	2	254.647	Aquatic Isopod	Aquatic crustacean
Reference	5	2004-06-03	June	2004	4	Eogammarus confervicolus	46	5856.89	Aquatic Amphipod	Aquatic crustacean
Reference	5	2004-06-03	June	2004	4	Amphipod, juv.	10	1273.24	Aquatic Amphipod	Aquatic crustacean
Reference	5	2004-06-03	June	2004	4	Oligochaeta	59	7512.1	Oligochaeta	Oligochaeta
Reference	5	2004-06-03	June	2004	4	Nematoda	3	381.971	Nematoda	Nematoda
Reference	5	2004-06-03	June	2004	4	Mussel, juv.	1	127.324	Bivalve	Mollusk
Reference	5	2004-06-03	June	2004	4	Nereidae	1	127.324	Nereidae	Polychaete	juv.
Reference	5	2004-06-03	June	2004	5	Hemigrapsus oregonensis	1	127.324	Crab	Aquatic crustacean
Reference	5	2004-06-03	June	2004	5	Oligochaeta	21	2673.8	Oligochaeta	Oligochaeta
Reference	5	2004-06-03	June	2004	5	Eogammarus confervicolus	14	1782.53	Aquatic Amphipod	Aquatic crustacean
Reference	5	2004-06-03	June	2004	5	Amphipod, juv.	11	1400.56	Aquatic Amphipod	Aquatic crustacean
Reference	5	2004-06-03	June	2004	5	Gnorimosphaeroma oregonense	4	509.295	Aquatic Isopod	Aquatic crustacean
Reference	5	2004-06-03	June	2004	5	Nematoda	2	254.647	Nematoda	Nematoda
Reference	5	2004-06-03	June	2004	5	Clam, juv.	1	127.324	Bivalve	Mollusk
Reference	5	2004-06-03	June	2004	6	Hemigrapsus oregonensis	1	127.324	Crab	Aquatic crustacean
Reference	5	2004-06-03	June	2004	6	Oligochaeta	55	7002.8	Oligochaeta	Oligochaeta
Reference	5	2004-06-03	June	2004	6	Nereidae	4	509.295	Nereidae	Polychaete	juv.
Reference	5	2004-06-03	June	2004	6	Amphipod, juv.	10	1273.24	Aquatic Amphipod	Aquatic crustacean
Reference	5	2004-06-03	June	2004	6	Eogammarus confervicolus	13	1655.21	Aquatic Amphipod	Aquatic crustacean
Reference	5	2004-06-03	June	2004	6	Gnorimosphaeroma oregonense	1	127.324	Aquatic Isopod	Aquatic crustacean
Reference	5	2004-06-03	June	2004	6	Nematoda	1	127.324	Nematoda	Nematoda
Reference	5	2004-06-03	June	2004	7	Oligochaeta	70	8912.66	Oligochaeta	Oligochaeta
Reference	5	2004-06-03	June	2004	7	Nematoda	5	636.618	Nematoda	Nematoda
Reference	5	2004-06-03	June	2004	7	Amphipod, juv.	35	4456.33	Aquatic Amphipod	Aquatic crustacean
Reference	5	2004-06-03	June	2004	7	Eogammarus confervicolus	17	2164.5	Aquatic Amphipod	Aquatic crustacean
Reference	5	2004-06-03	June	2004	7	Gnorimosphaeroma oregonense	4	509.295	Aquatic Isopod	Aquatic crustacean
Reference	5	2004-06-03	June	2004	7	Mussel, juv.	4	509.295	Bivalve	Mollusk
Reference	5	2004-06-03	June	2004	7	Mytilus edulis	3	381.971	Bivalve	Mollusk
Reference	8	2004-06-03	June	2004	1	Oligochaeta	34	4329	Oligochaeta	Oligochaeta
Reference	8	2004-06-03	June	2004	1	Nematoda	7	891.266	Nematoda	Nematoda
Reference	8	2004-06-03	June	2004	1	Talitridae, juv.	1	127.324	Terrestrial Amphipod	Terrestrial amphipod/isopod
Reference	8	2004-06-03	June	2004	1	Mussel, juv.	1	127.324	Bivalve	Mollusk
Reference	8	2004-06-03	June	2004	1	Turbellaria	2	254.647	Turbellaria	Nemertea/Turbellaria
Reference	8	2004-06-03	June	2004	2	Oligochaeta	60	7639.42	Oligochaeta	Oligochaeta
Reference	8	2004-06-03	June	2004	2	Talitridae, juv.	2	254.647	Terrestrial Amphipod	Terrestrial amphipod/isopod
Reference	8	2004-06-03	June	2004	2	Nematoda	5	636.618	Nematoda	Nematoda
Reference	8	2004-06-03	June	2004	2	Neanthes limnicola	1	127.324	Nereidae	Polychaete
Reference	8	2004-06-03	June	2004	2	Turbellaria	3	381.971	Turbellaria	Nemertea/Turbellaria
Reference	8	2004-06-03	June	2004	3	Talitridae, juv.	1	127.324	Terrestrial Amphipod	Terrestrial amphipod/isopod
Reference	8	2004-06-03	June	2004	3	Amphipod, juv.	1	127.324	Aquatic Amphipod	Aquatic crustacean
Reference	8	2004-06-03	June	2004	3	Oligochaeta	62	7894.07	Oligochaeta	Oligochaeta
Reference	8	2004-06-03	June	2004	3	Traskorchestia traskiana	1	127.324	Terrestrial Amphipod	Terrestrial amphipod/isopod
Reference	8	2004-06-03	June	2004	3	Nematoda	9	1145.91	Nematoda	Nematoda
Reference	8	2004-06-03	June	2004	3	Nereidae	1	127.324	Nereidae	Polychaete	juv.
Reference	8	2004-06-03	June	2004	3	Turbellaria	6	763.942	Turbellaria	Nemertea/Turbellaria
Reference	8	2004-06-03	June	2004	4	Chironomidae adult	1	127.324	Insect adult	Insect, Arachnid, Collembola
Reference	8	2004-06-03	June	2004	4	Oligochaeta	13	1655.21	Oligochaeta	Oligochaeta
Reference	8	2004-06-03	June	2004	4	Nematoda	2	254.647	Nematoda	Nematoda
Reference	8	2004-06-03	June	2004	4	Nereidae	4	509.295	Nereidae	Polychaete	juv.
Reference	8	2004-06-03	June	2004	4	Turbellaria	6	763.942	Turbellaria	Nemertea/Turbellaria
Reference	8	2004-06-03	June	2004	5	Oligochaeta	52	6620.83	Oligochaeta	Oligochaeta
Reference	8	2004-06-03	June	2004	5	Paramoera sp.	124	15788.1	Aquatic Amphipod	Aquatic crustacean
Reference	8	2004-06-03	June	2004	5	Nematoda	2	254.647	Nematoda	Nematoda
Reference	8	2004-06-03	June	2004	5	Nereidae	3	381.971	Nereidae	Polychaete	juv.
Reference	8	2004-06-03	June	2004	5	Turbellaria	23	2928.44	Turbellaria	Nemertea/Turbellaria
Reference	8	2004-06-03	June	2004	6	Oligochaeta	40	5092.95	Oligochaeta	Oligochaeta
Reference	8	2004-06-03	June	2004	6	Nematoda	3	381.971	Nematoda	Nematoda
Reference	8	2004-06-03	June	2004	6	Turbellaria	1	127.324	Turbellaria	Nemertea/Turbellaria
Reference	8	2004-06-03	June	2004	6	Amphipod, juv.	1	127.324	Aquatic Amphipod	Aquatic crustacean
Reference	8	2004-06-03	June	2004	6	Talitridae, juv.	1	127.324	Terrestrial Amphipod	Terrestrial amphipod/isopod
Reference	8	2004-06-03	June	2004	6	Nereidae	5	636.618	Nereidae	Polychaete	juv.
Reference	8	2004-06-03	June	2004	7	Oligochaeta	104	13241.7	Oligochaeta	Oligochaeta
Reference	8	2004-06-03	June	2004	7	Nematoda	4	509.295	Nematoda	Nematoda
Reference	8	2004-06-03	June	2004	7	Nereidae	5	636.618	Nereidae	Polychaete	juv.
Reference	8	2004-06-03	June	2004	7	Mussel, juv.	2	254.647	Bivalve	Mollusk
Reference	8	2004-06-03	June	2004	7	Clam, juv.	1	127.324	Bivalve	Mollusk
Reference	8	2004-06-03	June	2004	7	Talitridae, juv.	1	127.324	Terrestrial Amphipod	Terrestrial amphipod/isopod
Reference	8	2004-06-03	June	2004	7	Turbellaria	6	763.942	Turbellaria	Nemertea/Turbellaria
Reference	12	2004-06-03	June	2004	1	Talitridae, juv.	34	4329	Terrestrial Amphipod	Terrestrial amphipod/isopod
Reference	12	2004-06-03	June	2004	1	Oligochaeta	1	127.324	Oligochaeta	Oligochaeta
Reference	12	2004-06-03	June	2004	1	Detonella papillicornis	1	127.324	Terrestrial Isopod	Terrestrial amphipod/isopod
Reference	12	2004-06-03	June	2004	1	Psocoptera	1	127.324	Insect adult	Insect, Arachnid, Collembola
Reference	12	2004-06-03	June	2004	1	Grandidierella japonica	1	127.324	Aquatic Amphipod	Aquatic crustacean
Reference	12	2004-06-03	June	2004	1	Megalorchestia pugettensis	2	254.647	Terrestrial Amphipod	Terrestrial amphipod/isopod
Reference	12	2004-06-03	June	2004	1	Traskorchestia traskiana	15	1909.85	Terrestrial Amphipod	Terrestrial amphipod/isopod
Reference	12	2004-06-03	June	2004	1	Traskorchestia georgiana	10	1273.24	Terrestrial Amphipod	Terrestrial amphipod/isopod
Reference	12	2004-06-03	June	2004	2	Talitridae, juv.	161	20499.1	Terrestrial Amphipod	Terrestrial amphipod/isopod
Reference	12	2004-06-03	June	2004	2	Empididae larvae	1	127.324	Insect larvae	Insect, Arachnid, Collembola
Reference	12	2004-06-03	June	2004	2	Megalorchestia pugettensis	5	636.618	Terrestrial Amphipod	Terrestrial amphipod/isopod
Reference	12	2004-06-03	June	2004	2	Traskorchestia traskiana	19	2419.15	Terrestrial Amphipod	Terrestrial amphipod/isopod
Reference	12	2004-06-03	June	2004	2	Traskorchestia georgiana	25	3183.09	Terrestrial Amphipod	Terrestrial amphipod/isopod
Reference	12	2004-06-03	June	2004	2	Nematoda	1	127.324	Nematoda	Nematoda
Reference	12	2004-06-03	June	2004	2	Oligochaeta	16	2037.18	Oligochaeta	Oligochaeta
Reference	12	2004-06-03	June	2004	2	Acari	2	254.647	Arachnid	Insect, Arachnid, Collembola
Reference	12	2004-06-03	June	2004	2	Coleoptera larvae	3	381.971	Insect larvae	Insect, Arachnid, Collembola
Reference	12	2004-06-03	June	2004	3	Oligochaeta	54	6875.48	Oligochaeta	Oligochaeta
Reference	12	2004-06-03	June	2004	3	Diptera pupae	1	127.324	Insect larvae	Insect, Arachnid, Collembola
Reference	12	2004-06-03	June	2004	3	Talitridae, juv.	6	763.942	Terrestrial Amphipod	Terrestrial amphipod/isopod
Reference	12	2004-06-03	June	2004	3	Coleoptera larvae	1	127.324	Insect larvae	Insect, Arachnid, Collembola
Reference	12	2004-06-03	June	2004	4	Talitridae, juv.	62	7894.07	Terrestrial Amphipod	Terrestrial amphipod/isopod
Reference	12	2004-06-03	June	2004	4	Detonella papillicornis	1	127.324	Terrestrial Isopod	Terrestrial amphipod/isopod
Reference	12	2004-06-03	June	2004	4	Traskorchestia traskiana	67	8530.69	Terrestrial Amphipod	Terrestrial amphipod/isopod
Reference	12	2004-06-03	June	2004	4	Traskorchestia georgiana	36	4583.65	Terrestrial Amphipod	Terrestrial amphipod/isopod
Reference	12	2004-06-03	June	2004	4	Oligochaeta	23	2928.44	Oligochaeta	Oligochaeta
Reference	12	2004-06-03	June	2004	4	Acari	1	127.324	Arachnid	Insect, Arachnid, Collembola
Reference	12	2004-06-03	June	2004	4	Coleoptera larvae	1	127.324	Insect larvae	Insect, Arachnid, Collembola
Reference	12	2004-06-03	June	2004	5	Traskorchestia traskiana	98	12477.7	Terrestrial Amphipod	Terrestrial amphipod/isopod
Reference	12	2004-06-03	June	2004	5	Talitridae, juv.	47	5984.21	Terrestrial Amphipod	Terrestrial amphipod/isopod
Reference	12	2004-06-03	June	2004	5	Oligochaeta	7	891.266	Oligochaeta	Oligochaeta
Reference	12	2004-06-03	June	2004	5	Acari	6	763.942	Arachnid	Insect, Arachnid, Collembola
Reference	12	2004-06-03	June	2004	5	Isotomidae	1	127.324	Collembola	Insect, Arachnid, Collembola
Reference	12	2004-06-03	June	2004	5	Empididae larvae	2	254.647	Insect larvae	Insect, Arachnid, Collembola
Reference	12	2004-06-03	June	2004	5	Coleoptera larvae	3	381.971	Insect larvae	Insect, Arachnid, Collembola
Reference	12	2004-06-03	June	2004	5	Coleoptera	1	127.324	Insect adult	Insect, Arachnid, Collembola
Reference	12	2004-06-03	June	2004	5	Detonella papillicornis	1	127.324	Terrestrial Isopod	Terrestrial amphipod/isopod
Reference	12	2004-06-03	June	2004	5	Traskorchestia georgiana	57	7257.45	Terrestrial Amphipod	Terrestrial amphipod/isopod
Reference	12	2004-06-03	June	2004	6	Detonella papillicornis	9	1145.91	Terrestrial Isopod	Terrestrial amphipod/isopod
Reference	12	2004-06-03	June	2004	6	Chironomidae larvae	3	381.971	Insect larvae	Insect, Arachnid, Collembola
Reference	12	2004-06-03	June	2004	6	Talitridae, juv.	92	11713.8	Terrestrial Amphipod	Terrestrial amphipod/isopod
Reference	12	2004-06-03	June	2004	6	Traskorchestia traskiana	148	18843.9	Terrestrial Amphipod	Terrestrial amphipod/isopod
Reference	12	2004-06-03	June	2004	6	Traskorchestia georgiana	48	6111.54	Terrestrial Amphipod	Terrestrial amphipod/isopod
Reference	12	2004-06-03	June	2004	6	Oligochaeta	14	1782.53	Oligochaeta	Oligochaeta
Reference	12	2004-06-03	June	2004	6	Acari	4	509.295	Arachnid	Insect, Arachnid, Collembola
Reference	12	2004-06-03	June	2004	6	Coleoptera larvae	1	127.324	Insect larvae	Insect, Arachnid, Collembola
Reference	12	2004-06-03	June	2004	6	Diptera larvae	1	127.324	Insect larvae	Insect, Arachnid, Collembola
Reference	12	2004-06-03	June	2004	6	Coleoptera	2	254.647	Insect adult	Insect, Arachnid, Collembola
Reference	12	2004-06-03	June	2004	6	Staphylinidae	1	127.324	Insect adult	Insect, Arachnid, Collembola
Reference	12	2004-06-03	June	2004	7	Staphylinidae	1	127.324	Insect adult	Insect, Arachnid, Collembola
Reference	12	2004-06-03	June	2004	7	Talitridae, juv.	75	9549.27	Terrestrial Amphipod	Terrestrial amphipod/isopod
Reference	12	2004-06-03	June	2004	7	Oligochaeta	27	3437.74	Oligochaeta	Oligochaeta
Reference	12	2004-06-03	June	2004	7	Detonella papillicornis	1	127.324	Terrestrial Isopod	Terrestrial amphipod/isopod
Reference	12	2004-06-03	June	2004	7	Traskorchestia traskiana	52	6620.83	Terrestrial Amphipod	Terrestrial amphipod/isopod
Reference	12	2004-06-03	June	2004	7	Traskorchestia georgiana	44	5602.24	Terrestrial Amphipod	Terrestrial amphipod/isopod
Reference	12	2004-06-03	June	2004	7	Acari	17	2164.5	Arachnid	Insect, Arachnid, Collembola
Reference	12	2004-06-03	June	2004	7	Coleoptera larvae	1	127.324	Insect larvae	Insect, Arachnid, Collembola
Reference	12	2004-06-03	June	2004	7	Empididae larvae	1	127.324	Insect larvae	Insect, Arachnid, Collembola
Restored 2005	5	2004-06-03	June	2004	1	Oligochaeta	111	14132.9	Oligochaeta	Oligochaeta
Restored 2005	5	2004-06-03	June	2004	1	Gnorimosphaeroma oregonense	1	127.324	Aquatic Isopod	Aquatic crustacean
Restored 2005	5	2004-06-03	June	2004	1	Clam, juv.	1	127.324	Bivalve	Mollusk
Restored 2005	5	2004-06-03	June	2004	1	Turbellaria	6	763.942	Turbellaria	Nemertea/Turbellaria
Restored 2005	5	2004-06-03	June	2004	1	Amphipod, juv.	1	127.324	Aquatic Amphipod	Aquatic crustacean
Restored 2005	5	2004-06-03	June	2004	2	Oligochaeta	155	19735.2	Oligochaeta	Oligochaeta
Restored 2005	5	2004-06-03	June	2004	2	Eogammarus confervicolus	22	2801.12	Aquatic Amphipod	Aquatic crustacean
Restored 2005	5	2004-06-03	June	2004	2	Gnorimosphaeroma oregonense	5	636.618	Aquatic Isopod	Aquatic crustacean
Restored 2005	5	2004-06-03	June	2004	2	Amphipod, juv.	8	1018.59	Aquatic Amphipod	Aquatic crustacean
Restored 2005	5	2004-06-03	June	2004	2	Nematoda	1	127.324	Nematoda	Nematoda
Restored 2005	5	2004-06-03	June	2004	2	Clam, juv.	1	127.324	Bivalve	Mollusk
Restored 2005	5	2004-06-03	June	2004	3	Oligochaeta	122	15533.5	Oligochaeta	Oligochaeta
Restored 2005	5	2004-06-03	June	2004	3	Gnorimosphaeroma oregonense	4	509.295	Aquatic Isopod	Aquatic crustacean
Restored 2005	5	2004-06-03	June	2004	3	Clam, juv.	3	381.971	Bivalve	Mollusk
Restored 2005	5	2004-06-03	June	2004	3	Turbellaria	11	1400.56	Turbellaria	Nemertea/Turbellaria
Restored 2005	5	2004-06-03	June	2004	3	Polychaete	1	127.324	Polychaete, unk.	Polychaete
Restored 2005	5	2004-06-03	June	2004	4	Glyceridae	1	127.324	Glyceridae	Polychaete
Restored 2005	5	2004-06-03	June	2004	4	Ostracoda	3	381.971	Ostracoda	Aquatic crustacean
Restored 2005	5	2004-06-03	June	2004	4	Polychaete	5	636.618	Polychaete, unk.	Polychaete	juv.
Restored 2005	5	2004-06-03	June	2004	4	Oligochaeta	8	1018.59	Oligochaeta	Oligochaeta
Restored 2005	5	2004-06-03	June	2004	4	Spionidae	1	127.324	Spionidae	Polychaete
Restored 2005	5	2004-06-03	June	2004	4	Amphipod, juv.	1	127.324	Aquatic Amphipod	Aquatic crustacean
Restored 2005	5	2004-06-03	June	2004	4	Phyllodocidae	1	127.324	Phyllodocidae	Polychaete
Restored 2005	5	2004-06-03	June	2004	4	Nematoda	1	127.324	Nematoda	Nematoda
Restored 2005	5	2004-06-03	June	2004	5	Hemigrapsus oregonensis	4	509.295	Crab	Aquatic crustacean
Restored 2005	5	2004-06-03	June	2004	5	Glyceridae	11	1400.56	Glyceridae	Polychaete
Restored 2005	5	2004-06-03	June	2004	5	Oligochaeta	4	509.295	Oligochaeta	Oligochaeta
Restored 2005	5	2004-06-03	June	2004	5	Nematoda	1	127.324	Nematoda	Nematoda
Restored 2005	5	2004-06-03	June	2004	5	Hemipodia simplex	2	254.647	Glyceridae	Polychaete
Restored 2005	5	2004-06-03	June	2004	5	Phyllodoce longipes	1	127.324	Phyllodocidae	Polychaete
Restored 2005	5	2004-06-03	June	2004	5	Amphipod, juv.	5	636.618	Aquatic Amphipod	Aquatic crustacean
Restored 2005	5	2004-06-03	June	2004	5	Gnorimosphaeroma oregonense	1	127.324	Aquatic Isopod	Aquatic crustacean
Restored 2005	5	2004-06-03	June	2004	5	Clam, juv.	1	127.324	Bivalve	Mollusk
Restored 2005	5	2004-06-03	June	2004	6	Hemipodia simplex	10	1273.24	Glyceridae	Polychaete
Restored 2005	5	2004-06-03	June	2004	6	Armandia brevis	1	127.324	Opheliidae	Polychaete
Restored 2005	5	2004-06-03	June	2004	6	Hemigrapsus oregonensis	1	127.324	Crab	Aquatic crustacean
Restored 2005	5	2004-06-03	June	2004	6	Clam, juv.	3	381.971	Bivalve	Mollusk
Restored 2005	5	2004-06-03	June	2004	6	Amphipod, juv.	9	1145.91	Aquatic Amphipod	Aquatic crustacean
Restored 2005	5	2004-06-03	June	2004	6	Gnorimosphaeroma oregonense	5	636.618	Aquatic Isopod	Aquatic crustacean
Restored 2005	5	2004-06-03	June	2004	6	Nematoda	1	127.324	Nematoda	Nematoda
Restored 2005	5	2004-06-03	June	2004	6	Oligochaeta	2	254.647	Oligochaeta	Oligochaeta
Restored 2005	5	2004-06-03	June	2004	6	Turbellaria	5	636.618	Turbellaria	Nemertea/Turbellaria
Restored 2005	5	2004-06-03	June	2004	7	Mussel, juv.	2	254.647	Bivalve	Mollusk
Restored 2005	5	2004-06-03	June	2004	7	Allorchestes sp.	2	254.647	Aquatic Amphipod	Aquatic crustacean
Restored 2005	5	2004-06-03	June	2004	7	Amphipod, juv.	10	1273.24	Aquatic Amphipod	Aquatic crustacean
Restored 2005	5	2004-06-03	June	2004	7	Gnorimosphaeroma oregonense	3	381.971	Aquatic Isopod	Aquatic crustacean
Restored 2005	5	2004-06-03	June	2004	7	Nematoda	1	127.324	Nematoda	Nematoda
Restored 2005	5	2004-06-03	June	2004	7	Oligochaeta	45	5729.56	Oligochaeta	Oligochaeta
Restored 2005	5	2004-06-03	June	2004	7	Clam, juv.	9	1145.91	Bivalve	Mollusk
Restored 2005	5	2004-06-03	June	2004	7	Hemigrapsus oregonensis	1	127.324	Crab	Aquatic crustacean
Restored 2005	5	2004-06-03	June	2004	7	Glyceridae	13	1655.21	Glyceridae	Polychaete
Restored 2005	8	2004-06-03	June	2004	1	Mussel, juv.	1	127.324	Bivalve	Mollusk
Restored 2005	8	2004-06-03	June	2004	1	Oligochaeta	3	381.971	Oligochaeta	Oligochaeta
Restored 2005	8	2004-06-03	June	2004	2	Oligochaeta	13	1655.21	Oligochaeta	Oligochaeta
Restored 2005	8	2004-06-03	June	2004	2	Gnorimosphaeroma oregonense	4	509.295	Aquatic Isopod	Aquatic crustacean
Restored 2005	8	2004-06-03	June	2004	2	Nematoda	7	891.266	Nematoda	Nematoda
Restored 2005	8	2004-06-03	June	2004	2	Clam, juv.	1	127.324	Bivalve	Mollusk
Restored 2005	8	2004-06-03	June	2004	3	Oligochaeta	4	509.295	Oligochaeta	Oligochaeta
Restored 2005	8	2004-06-03	June	2004	3	Amphipod, juv.	1	127.324	Aquatic Amphipod	Aquatic crustacean
Restored 2005	8	2004-06-03	June	2004	3	Mussel, juv.	2	254.647	Bivalve	Mollusk
Restored 2005	8	2004-06-03	June	2004	4	Gnorimosphaeroma oregonense	1	127.324	Aquatic Isopod	Aquatic crustacean
Restored 2005	8	2004-06-03	June	2004	4	Mussel, juv.	1	127.324	Bivalve	Mollusk
Restored 2005	8	2004-06-03	June	2004	4	Nematoda	2	254.647	Nematoda	Nematoda
Restored 2005	8	2004-06-03	June	2004	4	Oligochaeta	5	636.618	Oligochaeta	Oligochaeta
Restored 2005	8	2004-06-03	June	2004	4	Nereidae	1	127.324	Nereidae	Polychaete	juv.
Restored 2005	8	2004-06-03	June	2004	5	Harpacticus sp. A	1	127.324	Harpacticoid	Aquatic crustacean
Restored 2005	8	2004-06-03	June	2004	5	Nematoda	19	2419.15	Nematoda	Nematoda
Restored 2005	8	2004-06-03	June	2004	5	Oligochaeta	21	2673.8	Oligochaeta	Oligochaeta
Restored 2005	8	2004-06-03	June	2004	5	Mussel, juv.	1	127.324	Bivalve	Mollusk
Restored 2005	8	2004-06-03	June	2004	5	Turbellaria	2	254.647	Turbellaria	Nemertea/Turbellaria
Restored 2005	8	2004-06-03	June	2004	6	Polychaete	1	127.324	Polychaete, unk.	Polychaete	juv.
Restored 2005	8	2004-06-03	June	2004	6	Turbellaria	1	127.324	Turbellaria	Nemertea/Turbellaria
Restored 2005	8	2004-06-03	June	2004	6	Nematoda	3	381.971	Nematoda	Nematoda
Restored 2005	8	2004-06-03	June	2004	6	Oligochaeta	7	891.266	Oligochaeta	Oligochaeta
Restored 2005	8	2004-06-03	June	2004	7	Gnorimosphaeroma oregonense	1	127.324	Aquatic Isopod	Aquatic crustacean
Restored 2005	8	2004-06-03	June	2004	7	Nematoda	7	891.266	Nematoda	Nematoda
Restored 2005	8	2004-06-03	June	2004	7	Oligochaeta	3	381.971	Oligochaeta	Oligochaeta
Reference	5	2004-07-07	July	2004	1	Oligochaeta	93	11841.1	Oligochaeta	Oligochaeta
Reference	5	2004-07-07	July	2004	1	Nematoda	1	127.324	Nematoda	Nematoda
Reference	5	2004-07-07	July	2004	1	Turbellaria	1	127.324	Turbellaria	Nemertea/Turbellaria
Reference	5	2004-07-07	July	2004	1	Nereidae	1	127.324	Nereidae	Polychaete	juv.
Reference	5	2004-07-07	July	2004	1	Eogammarus confervicolus	14	1782.53	Aquatic Amphipod	Aquatic crustacean
Reference	5	2004-07-07	July	2004	1	Amphipod, juv.	3	381.971	Aquatic Amphipod	Aquatic crustacean
Reference	5	2004-07-07	July	2004	2	Oligochaeta	87	11077.2	Oligochaeta	Oligochaeta
Reference	5	2004-07-07	July	2004	2	Nematoda	5	636.618	Nematoda	Nematoda
Reference	5	2004-07-07	July	2004	2	Nereidae	1	127.324	Nereidae	Polychaete	juv.
Reference	5	2004-07-07	July	2004	2	Eogammarus confervicolus	2	254.647	Aquatic Amphipod	Aquatic crustacean
Reference	5	2004-07-07	July	2004	2	Amphipod, juv.	1	127.324	Aquatic Amphipod	Aquatic crustacean
Reference	5	2004-07-07	July	2004	2	Gastropoda	1	127.324	Gastropod	Mollusk
Reference	5	2004-07-07	July	2004	2	Mussel, juv.	1	127.324	Bivalve	Mollusk
Reference	5	2004-07-07	July	2004	3	Oligochaeta	65	8276.04	Oligochaeta	Oligochaeta
Reference	5	2004-07-07	July	2004	3	Nematoda	2	254.647	Nematoda	Nematoda
Reference	5	2004-07-07	July	2004	3	Amphipod, juv.	1	127.324	Aquatic Amphipod	Aquatic crustacean
Reference	5	2004-07-07	July	2004	3	Nereidae	2	254.647	Nereidae	Polychaete	juv.
Reference	5	2004-07-07	July	2004	4	Oligochaeta	34	4329	Oligochaeta	Oligochaeta
Reference	5	2004-07-07	July	2004	4	Nematoda	1	127.324	Nematoda	Nematoda
Reference	5	2004-07-07	July	2004	4	Chironomidae pupae	1	127.324	Insect larvae	Insect, Arachnid, Collembola
Reference	5	2004-07-07	July	2004	4	Amphipod, juv.	2	254.647	Aquatic Amphipod	Aquatic crustacean
Reference	5	2004-07-07	July	2004	5	Oligochaeta	94	11968.4	Oligochaeta	Oligochaeta
Reference	5	2004-07-07	July	2004	5	Nematoda	1	127.324	Nematoda	Nematoda
Reference	5	2004-07-07	July	2004	5	Nereidae	1	127.324	Nereidae	Polychaete	juv.
Reference	5	2004-07-07	July	2004	5	Amphipod, juv.	1	127.324	Aquatic Amphipod	Aquatic crustacean
Reference	5	2004-07-07	July	2004	5	Eogammarus confervicolus	2	254.647	Aquatic Amphipod	Aquatic crustacean
Reference	5	2004-07-07	July	2004	5	Chironomidae larvae	1	127.324	Insect larvae	Insect, Arachnid, Collembola
Reference	5	2004-07-07	July	2004	6	Oligochaeta	22	2801.12	Oligochaeta	Oligochaeta
Reference	5	2004-07-07	July	2004	6	Eogammarus confervicolus	7	891.266	Aquatic Amphipod	Aquatic crustacean
Reference	5	2004-07-07	July	2004	6	Amphipod, juv.	2	254.647	Aquatic Amphipod	Aquatic crustacean
Reference	5	2004-07-07	July	2004	6	Chironomidae larvae	1	127.324	Insect larvae	Insect, Arachnid, Collembola
Reference	5	2004-07-07	July	2004	7	Oligochaeta	37	4710.98	Oligochaeta	Oligochaeta
Reference	5	2004-07-07	July	2004	7	Nematoda	2	254.647	Nematoda	Nematoda
Reference	5	2004-07-07	July	2004	7	Eogammarus confervicolus	3	381.971	Aquatic Amphipod	Aquatic crustacean
Reference	5	2004-07-07	July	2004	7	Nereidae	1	127.324	Nereidae	Polychaete	juv.
Reference	8	2004-07-07	July	2004	1	Oligochaeta	23	2928.44	Oligochaeta	Oligochaeta
Reference	8	2004-07-07	July	2004	1	Nematoda	1	127.324	Nematoda	Nematoda
Reference	8	2004-07-07	July	2004	1	Turbellaria	5	636.618	Turbellaria	Nemertea/Turbellaria
Reference	8	2004-07-07	July	2004	2	Oligochaeta	32	4074.36	Oligochaeta	Oligochaeta
Reference	8	2004-07-07	July	2004	2	Turbellaria	12	1527.88	Turbellaria	Nemertea/Turbellaria
Reference	8	2004-07-07	July	2004	3	Oligochaeta	32	4074.36	Oligochaeta	Oligochaeta
Reference	8	2004-07-07	July	2004	3	Turbellaria	17	2164.5	Turbellaria	Nemertea/Turbellaria
Reference	8	2004-07-07	July	2004	3	Nematoda	2	254.647	Nematoda	Nematoda
Reference	8	2004-07-07	July	2004	4	Oligochaeta	74	9421.95	Oligochaeta	Oligochaeta
Reference	8	2004-07-07	July	2004	4	Empididae larvae	1	127.324	Insect larvae	Insect, Arachnid, Collembola
Reference	8	2004-07-07	July	2004	4	Turbellaria	26	3310.42	Turbellaria	Nemertea/Turbellaria
Reference	8	2004-07-07	July	2004	4	Talitridae, juv.	1	127.324	Terrestrial Amphipod	Terrestrial amphipod/isopod
Reference	8	2004-07-07	July	2004	4	Nematoda	1	127.324	Nematoda	Nematoda
Reference	8	2004-07-07	July	2004	5	Oligochaeta	34	4329	Oligochaeta	Oligochaeta
Reference	8	2004-07-07	July	2004	5	Turbellaria	10	1273.24	Turbellaria	Nemertea/Turbellaria
Reference	8	2004-07-07	July	2004	5	Nematoda	3	381.971	Nematoda	Nematoda
Reference	8	2004-07-07	July	2004	6	Oligochaeta	17	2164.5	Oligochaeta	Oligochaeta
Reference	8	2004-07-07	July	2004	6	Turbellaria	20	2546.47	Turbellaria	Nemertea/Turbellaria
Reference	8	2004-07-07	July	2004	6	Nematoda	2	254.647	Nematoda	Nematoda
Reference	8	2004-07-07	July	2004	6	Mussel, juv.	1	127.324	Bivalve	Mollusk
Reference	8	2004-07-07	July	2004	7	Oligochaeta	20	2546.47	Oligochaeta	Oligochaeta
Reference	8	2004-07-07	July	2004	7	Turbellaria	16	2037.18	Turbellaria	Nemertea/Turbellaria
Reference	8	2004-07-07	July	2004	7	Nematoda	4	509.295	Nematoda	Nematoda
Reference	12	2004-07-07	July	2004	1	Talitridae, juv.	78	9931.25	Terrestrial Amphipod	Terrestrial amphipod/isopod
Reference	12	2004-07-07	July	2004	1	Insect pupae	1	127.324	Insect larvae	Insect, Arachnid, Collembola
Reference	12	2004-07-07	July	2004	1	Ceratopogonidae larvae	1	127.324	Insect larvae	Insect, Arachnid, Collembola
Reference	12	2004-07-07	July	2004	1	Detonella papillicornis	2	254.647	Terrestrial Isopod	Terrestrial amphipod/isopod
Reference	12	2004-07-07	July	2004	1	Traskorchestia traskiana	3	381.971	Terrestrial Amphipod	Terrestrial amphipod/isopod
Reference	12	2004-07-07	July	2004	1	Traskorchestia georgiana	14	1782.53	Terrestrial Amphipod	Terrestrial amphipod/isopod
Reference	12	2004-07-07	July	2004	1	Oligochaeta	1	127.324	Oligochaeta	Oligochaeta
Reference	12	2004-07-07	July	2004	1	Acari	1	127.324	Arachnid	Insect, Arachnid, Collembola
Reference	12	2004-07-07	July	2004	2	Talitridae, juv.	49	6238.86	Terrestrial Amphipod	Terrestrial amphipod/isopod
Reference	12	2004-07-07	July	2004	2	Traskorchestia traskiana	4	509.295	Terrestrial Amphipod	Terrestrial amphipod/isopod
Reference	12	2004-07-07	July	2004	2	Traskorchestia georgiana	9	1145.91	Terrestrial Amphipod	Terrestrial amphipod/isopod
Reference	12	2004-07-07	July	2004	2	Oligochaeta	6	763.942	Oligochaeta	Oligochaeta
Reference	12	2004-07-07	July	2004	2	Turbellaria	1	127.324	Turbellaria	Nemertea/Turbellaria
Reference	12	2004-07-07	July	2004	3	Talitridae, juv.	178	22663.6	Terrestrial Amphipod	Terrestrial amphipod/isopod
Reference	12	2004-07-07	July	2004	3	Oligochaeta	12	1527.88	Oligochaeta	Oligochaeta
Reference	12	2004-07-07	July	2004	3	Diptera	1	127.324	Insect adult	Insect, Arachnid, Collembola
Reference	12	2004-07-07	July	2004	3	Traskorchestia traskiana	10	1273.24	Terrestrial Amphipod	Terrestrial amphipod/isopod
Reference	12	2004-07-07	July	2004	3	Traskorchestia georgiana	1	127.324	Terrestrial Amphipod	Terrestrial amphipod/isopod
Reference	12	2004-07-07	July	2004	3	Acari	1	127.324	Arachnid	Insect, Arachnid, Collembola
Reference	12	2004-07-07	July	2004	3	Isotomidae	1	127.324	Collembola	Insect, Arachnid, Collembola
Reference	12	2004-07-07	July	2004	3	Coleoptera larvae	1	127.324	Insect larvae	Insect, Arachnid, Collembola
Reference	12	2004-07-07	July	2004	4	Talitridae, juv.	131	16679.4	Terrestrial Amphipod	Terrestrial amphipod/isopod
Reference	12	2004-07-07	July	2004	4	Nematoda	1	127.324	Nematoda	Nematoda
Reference	12	2004-07-07	July	2004	4	Oligochaeta	6	763.942	Oligochaeta	Oligochaeta
Reference	12	2004-07-07	July	2004	4	Psocoptera	1	127.324	Insect adult	Insect, Arachnid, Collembola
Reference	12	2004-07-07	July	2004	4	Traskorchestia traskiana	9	1145.91	Terrestrial Amphipod	Terrestrial amphipod/isopod
Reference	12	2004-07-07	July	2004	4	Traskorchestia georgiana	6	763.942	Terrestrial Amphipod	Terrestrial amphipod/isopod
Reference	12	2004-07-07	July	2004	5	Talitridae, juv.	217	27629.2	Terrestrial Amphipod	Terrestrial amphipod/isopod
Reference	12	2004-07-07	July	2004	5	Traskorchestia traskiana	8	1018.59	Terrestrial Amphipod	Terrestrial amphipod/isopod
Reference	12	2004-07-07	July	2004	5	Traskorchestia georgiana	6	763.942	Terrestrial Amphipod	Terrestrial amphipod/isopod
Reference	12	2004-07-07	July	2004	5	Nematoda	2	254.647	Nematoda	Nematoda
Reference	12	2004-07-07	July	2004	5	Oligochaeta	11	1400.56	Oligochaeta	Oligochaeta
Reference	12	2004-07-07	July	2004	5	Acari	1	127.324	Arachnid	Insect, Arachnid, Collembola
Reference	12	2004-07-07	July	2004	5	Isotomidae	1	127.324	Collembola	Insect, Arachnid, Collembola
Reference	12	2004-07-07	July	2004	6	Talitridae, juv.	480	61115.4	Terrestrial Amphipod	Terrestrial amphipod/isopod
Reference	12	2004-07-07	July	2004	6	Coleoptera	1	127.324	Insect adult	Insect, Arachnid, Collembola
Reference	12	2004-07-07	July	2004	6	Traskorchestia traskiana	6	763.942	Terrestrial Amphipod	Terrestrial amphipod/isopod
Reference	12	2004-07-07	July	2004	6	Traskorchestia georgiana	10	1273.24	Terrestrial Amphipod	Terrestrial amphipod/isopod
Reference	12	2004-07-07	July	2004	6	Nematoda	1	127.324	Nematoda	Nematoda
Reference	12	2004-07-07	July	2004	6	Oligochaeta	25	3183.09	Oligochaeta	Oligochaeta
Reference	12	2004-07-07	July	2004	6	Acari	2	254.647	Arachnid	Insect, Arachnid, Collembola
Reference	12	2004-07-07	July	2004	6	Isotomidae	1	127.324	Collembola	Insect, Arachnid, Collembola
Reference	12	2004-07-07	July	2004	7	Talitridae, juv.	256	32594.9	Terrestrial Amphipod	Terrestrial amphipod/isopod
Reference	12	2004-07-07	July	2004	7	Traskorchestia traskiana	6	763.942	Terrestrial Amphipod	Terrestrial amphipod/isopod
Reference	12	2004-07-07	July	2004	7	Traskorchestia georgiana	1	127.324	Terrestrial Amphipod	Terrestrial amphipod/isopod
Reference	12	2004-07-07	July	2004	7	Oligochaeta	10	1273.24	Oligochaeta	Oligochaeta
Restored 2005	5	2004-07-07	July	2004	1	Oligochaeta	98	12477.7	Oligochaeta	Oligochaeta
Restored 2005	5	2004-07-07	July	2004	1	Nematoda	11	1400.56	Nematoda	Nematoda
Restored 2005	5	2004-07-07	July	2004	1	Turbellaria	2	254.647	Turbellaria	Nemertea/Turbellaria
Restored 2005	5	2004-07-07	July	2004	1	Porcellidium	2	254.647	Harpacticoid	Aquatic crustacean
Restored 2005	5	2004-07-07	July	2004	1	Mussel, juv.	1	127.324	Bivalve	Mollusk
Restored 2005	5	2004-07-07	July	2004	1	Nereidae	2	254.647	Nereidae	Polychaete	juv.
Restored 2005	5	2004-07-07	July	2004	1	Harpacticus sp. A	1	127.324	Harpacticoid	Aquatic crustacean
Restored 2005	5	2004-07-07	July	2004	2	Oligochaeta	282	35905.3	Oligochaeta	Oligochaeta
Restored 2005	5	2004-07-07	July	2004	2	Nereidae	2	254.647	Nereidae	Polychaete	juv.
Restored 2005	5	2004-07-07	July	2004	2	Turbellaria	9	1145.91	Turbellaria	Nemertea/Turbellaria
Restored 2005	5	2004-07-07	July	2004	3	Oligochaeta	274	34886.7	Oligochaeta	Oligochaeta
Restored 2005	5	2004-07-07	July	2004	3	Nematoda	26	3310.42	Nematoda	Nematoda
Restored 2005	5	2004-07-07	July	2004	3	Turbellaria	10	1273.24	Turbellaria	Nemertea/Turbellaria
Restored 2005	5	2004-07-07	July	2004	3	Isotomidae	1	127.324	Collembola	Insect, Arachnid, Collembola
Restored 2005	5	2004-07-07	July	2004	4	Oligochaeta	197	25082.8	Oligochaeta	Oligochaeta
Restored 2005	5	2004-07-07	July	2004	4	Aphididae	1	127.324	Insect adult	Insect, Arachnid, Collembola
Restored 2005	5	2004-07-07	July	2004	4	Nematoda	9	1145.91	Nematoda	Nematoda
Restored 2005	5	2004-07-07	July	2004	4	Turbellaria	18	2291.83	Turbellaria	Nemertea/Turbellaria
Restored 2005	5	2004-07-07	July	2004	4	Harpacticus sp. A	1	127.324	Harpacticoid	Aquatic crustacean
Restored 2005	5	2004-07-07	July	2004	4	Nereidae	1	127.324	Nereidae	Polychaete	juv.
Restored 2005	5	2004-07-07	July	2004	5	Oligochaeta	124	15788.1	Oligochaeta	Oligochaeta
Restored 2005	5	2004-07-07	July	2004	5	Nematoda	9	1145.91	Nematoda	Nematoda
Restored 2005	5	2004-07-07	July	2004	5	Turbellaria	15	1909.85	Turbellaria	Nemertea/Turbellaria
Restored 2005	5	2004-07-07	July	2004	6	Oligochaeta	308	39215.7	Oligochaeta	Oligochaeta
Restored 2005	5	2004-07-07	July	2004	6	Nematoda	42	5347.59	Nematoda	Nematoda
Restored 2005	5	2004-07-07	July	2004	6	Nereidae	1	127.324	Nereidae	Polychaete	juv.
Restored 2005	5	2004-07-07	July	2004	6	Turbellaria	11	1400.56	Turbellaria	Nemertea/Turbellaria
Restored 2005	5	2004-07-07	July	2004	6	Chironomidae pupae	1	127.324	Insect larvae	Insect, Arachnid, Collembola
Restored 2005	5	2004-07-07	July	2004	7	Oligochaeta	104	13241.7	Oligochaeta	Oligochaeta
Restored 2005	5	2004-07-07	July	2004	7	Nematoda	16	2037.18	Nematoda	Nematoda
Restored 2005	5	2004-07-07	July	2004	7	Turbellaria	11	1400.56	Turbellaria	Nemertea/Turbellaria
Restored 2005	8	2004-07-07	July	2004	1	Oligochaeta	25	3183.09	Oligochaeta	Oligochaeta
Restored 2005	8	2004-07-07	July	2004	1	Nematoda	2	254.647	Nematoda	Nematoda
Restored 2005	8	2004-07-07	July	2004	2	Oligochaeta	52	6620.83	Oligochaeta	Oligochaeta
Restored 2005	8	2004-07-07	July	2004	2	Nematoda	8	1018.59	Nematoda	Nematoda
Restored 2005	8	2004-07-07	July	2004	3	Oligochaeta	52	6620.83	Oligochaeta	Oligochaeta
Restored 2005	8	2004-07-07	July	2004	3	Nematoda	16	2037.18	Nematoda	Nematoda
Restored 2005	8	2004-07-07	July	2004	4	Oligochaeta	23	2928.44	Oligochaeta	Oligochaeta
Restored 2005	8	2004-07-07	July	2004	4	Nematoda	4	509.295	Nematoda	Nematoda
Restored 2005	8	2004-07-07	July	2004	4	Clam, juv.	1	127.324	Bivalve	Mollusk
Restored 2005	8	2004-07-07	July	2004	5	Oligochaeta	23	2928.44	Oligochaeta	Oligochaeta
Restored 2005	8	2004-07-07	July	2004	5	Nematoda	8	1018.59	Nematoda	Nematoda
Restored 2005	8	2004-07-07	July	2004	5	Turbellaria	1	127.324	Turbellaria	Nemertea/Turbellaria
Restored 2005	8	2004-07-07	July	2004	6	Oligochaeta	25	3183.09	Oligochaeta	Oligochaeta
Restored 2005	8	2004-07-07	July	2004	6	Nematoda	9	1145.91	Nematoda	Nematoda
Restored 2005	8	2004-07-07	July	2004	7	Oligochaeta	20	2546.47	Oligochaeta	Oligochaeta
Restored 2005	8	2004-07-07	July	2004	7	Nematoda	12	1527.88	Nematoda	Nematoda
Restored 2005	8	2004-07-07	July	2004	7	Mussel, juv.	1	127.324	Bivalve	Mollusk
Restored 2005	8	2004-07-07	July	2004	7	Spionidae	1	127.324	Spionidae	Polychaete	juv.
Reference	5	2004-09-15	September	2004	1	Eogammarus confervicolus	3	381.971	Aquatic Amphipod	Aquatic crustacean
Reference	5	2004-09-15	September	2004	1	Allorchestes sp.	2	254.647	Aquatic Amphipod	Aquatic crustacean
Reference	5	2004-09-15	September	2004	1	Amphipod, juv.	1	127.324	Aquatic Amphipod	Aquatic crustacean
Reference	5	2004-09-15	September	2004	1	Traskorchestia georgiana	1	127.324	Terrestrial Amphipod	Terrestrial amphipod/isopod
Reference	5	2004-09-15	September	2004	1	Nematoda	3	381.971	Nematoda	Nematoda
Reference	5	2004-09-15	September	2004	1	Oligochaeta	49	6238.86	Oligochaeta	Oligochaeta
Reference	5	2004-09-15	September	2004	1	Turbellaria	1	127.324	Turbellaria	Nemertea/Turbellaria
Reference	5	2004-09-15	September	2004	2	Oligochaeta	122	15533.5	Oligochaeta	Oligochaeta
Reference	5	2004-09-15	September	2004	2	Spionidae	1	127.324	Spionidae	Polychaete
Reference	5	2004-09-15	September	2004	2	Mussel, juv.	2	254.647	Bivalve	Mollusk
Reference	5	2004-09-15	September	2004	2	Amphipod, juv.	1	127.324	Aquatic Amphipod	Aquatic crustacean
Reference	5	2004-09-15	September	2004	2	Gnorimosphaeroma oregonense	2	254.647	Aquatic Isopod	Aquatic crustacean
Reference	5	2004-09-15	September	2004	2	Nematoda	6	763.942	Nematoda	Nematoda
Reference	5	2004-09-15	September	2004	2	Traskorchestia traskiana	1	127.324	Terrestrial Amphipod	Terrestrial amphipod/isopod
Reference	5	2004-09-15	September	2004	2	Eogammarus confervicolus	6	763.942	Aquatic Amphipod	Aquatic crustacean
Reference	5	2004-09-15	September	2004	2	Lottiidae	1	127.324	Gastropod	Mollusk
Reference	5	2004-09-15	September	2004	3	Oligochaeta	43	5474.92	Oligochaeta	Oligochaeta
Reference	5	2004-09-15	September	2004	3	Paramoera sp.	1	127.324	Aquatic Amphipod	Aquatic crustacean
Reference	5	2004-09-15	September	2004	3	Eogammarus confervicolus	9	1145.91	Aquatic Amphipod	Aquatic crustacean
Reference	5	2004-09-15	September	2004	3	Amphipod, juv.	4	509.295	Aquatic Amphipod	Aquatic crustacean
Reference	5	2004-09-15	September	2004	3	Gnorimosphaeroma oregonense	2	254.647	Aquatic Isopod	Aquatic crustacean
Reference	5	2004-09-15	September	2004	3	Nematoda	5	636.618	Nematoda	Nematoda
Reference	5	2004-09-15	September	2004	4	Oligochaeta	34	4329	Oligochaeta	Oligochaeta
Reference	5	2004-09-15	September	2004	4	Paramoera sp.	4	509.295	Aquatic Amphipod	Aquatic crustacean
Reference	5	2004-09-15	September	2004	4	Mussel, juv.	1	127.324	Bivalve	Mollusk
Reference	5	2004-09-15	September	2004	4	Neanthes limnicola	1	127.324	Nereidae	Polychaete
Reference	5	2004-09-15	September	2004	4	Eogammarus confervicolus	16	2037.18	Aquatic Amphipod	Aquatic crustacean
Reference	5	2004-09-15	September	2004	4	Gnorimosphaeroma oregonense	2	254.647	Aquatic Isopod	Aquatic crustacean
Reference	5	2004-09-15	September	2004	4	Nematoda	3	381.971	Nematoda	Nematoda
Reference	5	2004-09-15	September	2004	5	Oligochaeta	47	5984.21	Oligochaeta	Oligochaeta
Reference	5	2004-09-15	September	2004	5	Eogammarus confervicolus	28	3565.06	Aquatic Amphipod	Aquatic crustacean
Reference	5	2004-09-15	September	2004	5	Gnorimosphaeroma oregonense	2	254.647	Aquatic Isopod	Aquatic crustacean
Reference	5	2004-09-15	September	2004	5	Nematoda	5	636.618	Nematoda	Nematoda
Reference	5	2004-09-15	September	2004	6	Oligochaeta	51	6493.51	Oligochaeta	Oligochaeta
Reference	5	2004-09-15	September	2004	6	Eogammarus confervicolus	18	2291.83	Aquatic Amphipod	Aquatic crustacean
Reference	5	2004-09-15	September	2004	6	Amphipod, juv.	1	127.324	Aquatic Amphipod	Aquatic crustacean
Reference	5	2004-09-15	September	2004	6	Gnorimosphaeroma oregonense	5	636.618	Aquatic Isopod	Aquatic crustacean
Reference	5	2004-09-15	September	2004	6	Nematoda	6	763.942	Nematoda	Nematoda
Reference	5	2004-09-15	September	2004	7	Oligochaeta	42	5347.59	Oligochaeta	Oligochaeta
Reference	5	2004-09-15	September	2004	7	Nereis vexillosa	1	127.324	Nereidae	Polychaete
Reference	5	2004-09-15	September	2004	7	Polychaete	1	127.324	Polychaete, unk.	Polychaete	juv.
Reference	5	2004-09-15	September	2004	7	Eogammarus confervicolus	7	891.266	Aquatic Amphipod	Aquatic crustacean
Reference	5	2004-09-15	September	2004	7	Amphipod, juv.	1	127.324	Aquatic Amphipod	Aquatic crustacean
Reference	5	2004-09-15	September	2004	7	Gnorimosphaeroma oregonense	3	381.971	Aquatic Isopod	Aquatic crustacean
Reference	5	2004-09-15	September	2004	7	Nematoda	3	381.971	Nematoda	Nematoda
Reference	8	2004-09-15	September	2004	1	Oligochaeta	112	14260.2	Oligochaeta	Oligochaeta
Reference	8	2004-09-15	September	2004	1	Turbellaria	19	2419.15	Turbellaria	Nemertea/Turbellaria
Reference	8	2004-09-15	September	2004	1	Eogammarus confervicolus	1	127.324	Aquatic Amphipod	Aquatic crustacean
Reference	8	2004-09-15	September	2004	1	Talitridae, juv.	1	127.324	Terrestrial Amphipod	Terrestrial amphipod/isopod
Reference	8	2004-09-15	September	2004	2	Oligochaeta	134	17061.4	Oligochaeta	Oligochaeta
Reference	8	2004-09-15	September	2004	2	Turbellaria	16	2037.18	Turbellaria	Nemertea/Turbellaria
Reference	8	2004-09-15	September	2004	2	Nematoda	8	1018.59	Nematoda	Nematoda
Reference	8	2004-09-15	September	2004	2	Paramoera sp.	8	1018.59	Aquatic Amphipod	Aquatic crustacean
Reference	8	2004-09-15	September	2004	2	Eogammarus confervicolus	2	254.647	Aquatic Amphipod	Aquatic crustacean
Reference	8	2004-09-15	September	2004	2	Nereidae	1	127.324	Nereidae	Polychaete
Reference	8	2004-09-15	September	2004	3	Paramoera sp.	5	636.618	Aquatic Amphipod	Aquatic crustacean
Reference	8	2004-09-15	September	2004	3	Oligochaeta	139	17698	Oligochaeta	Oligochaeta
Reference	8	2004-09-15	September	2004	3	Turbellaria	8	1018.59	Turbellaria	Nemertea/Turbellaria
Reference	8	2004-09-15	September	2004	3	Nematoda	6	763.942	Nematoda	Nematoda
Reference	8	2004-09-15	September	2004	4	Eogammarus confervicolus	1	127.324	Aquatic Amphipod	Aquatic crustacean
Reference	8	2004-09-15	September	2004	4	Paramoera sp.	1	127.324	Aquatic Amphipod	Aquatic crustacean
Reference	8	2004-09-15	September	2004	4	Gnorimosphaeroma oregonense	1	127.324	Aquatic Isopod	Aquatic crustacean
Reference	8	2004-09-15	September	2004	4	Oligochaeta	172	21899.7	Oligochaeta	Oligochaeta
Reference	8	2004-09-15	September	2004	4	Turbellaria	18	2291.83	Turbellaria	Nemertea/Turbellaria
Reference	8	2004-09-15	September	2004	4	Nematoda	3	381.971	Nematoda	Nematoda
Reference	8	2004-09-15	September	2004	5	Oligochaeta	71	9039.98	Oligochaeta	Oligochaeta
Reference	8	2004-09-15	September	2004	5	Neanthes limnicola	3	381.971	Nereidae	Polychaete
Reference	8	2004-09-15	September	2004	5	Turbellaria	8	1018.59	Turbellaria	Nemertea/Turbellaria
Reference	8	2004-09-15	September	2004	5	Nematoda	3	381.971	Nematoda	Nematoda
Reference	8	2004-09-15	September	2004	6	Oligochaeta	86	10949.8	Oligochaeta	Oligochaeta
Reference	8	2004-09-15	September	2004	6	Turbellaria	18	2291.83	Turbellaria	Nemertea/Turbellaria
Reference	8	2004-09-15	September	2004	6	Nematoda	12	1527.88	Nematoda	Nematoda
Reference	8	2004-09-15	September	2004	6	Isotomidae	1	127.324	Collembola	Insect, Arachnid, Collembola
Reference	8	2004-09-15	September	2004	7	Oligochaeta	180	22918.3	Oligochaeta	Oligochaeta
Reference	8	2004-09-15	September	2004	7	Turbellaria	13	1655.21	Turbellaria	Nemertea/Turbellaria
Reference	8	2004-09-15	September	2004	7	Nematoda	4	509.295	Nematoda	Nematoda
Reference	8	2004-09-15	September	2004	7	Ephydridae adult	1	127.324	Insect adult	Insect, Arachnid, Collembola
Reference	12	2004-09-15	September	2004	1	Oligochaeta	74	9421.95	Oligochaeta	Oligochaeta
Reference	12	2004-09-15	September	2004	1	Talitridae, juv.	119	15151.5	Terrestrial Amphipod	Terrestrial amphipod/isopod
Reference	12	2004-09-15	September	2004	1	Megalorchestia pugettensis	1	127.324	Terrestrial Amphipod	Terrestrial amphipod/isopod
Reference	12	2004-09-15	September	2004	1	Traskorchestia traskiana	2	254.647	Terrestrial Amphipod	Terrestrial amphipod/isopod
Reference	12	2004-09-15	September	2004	1	Traskorchestia georgiana	4	509.295	Terrestrial Amphipod	Terrestrial amphipod/isopod
Reference	12	2004-09-15	September	2004	1	Nematoda	6	763.942	Nematoda	Nematoda
Reference	12	2004-09-15	September	2004	2	Oligochaeta	27	3437.74	Oligochaeta	Oligochaeta
Reference	12	2004-09-15	September	2004	2	Talitridae, juv.	97	12350.4	Terrestrial Amphipod	Terrestrial amphipod/isopod
Reference	12	2004-09-15	September	2004	2	Traskorchestia traskiana	9	1145.91	Terrestrial Amphipod	Terrestrial amphipod/isopod
Reference	12	2004-09-15	September	2004	2	Traskorchestia georgiana	1	127.324	Terrestrial Amphipod	Terrestrial amphipod/isopod
Reference	12	2004-09-15	September	2004	2	Nematoda	1	127.324	Nematoda	Nematoda
Reference	12	2004-09-15	September	2004	3	Oligochaeta	96	12223.1	Oligochaeta	Oligochaeta
Reference	12	2004-09-15	September	2004	3	Nematoda	4	509.295	Nematoda	Nematoda
Reference	12	2004-09-15	September	2004	3	Talitridae, juv.	27	3437.74	Terrestrial Amphipod	Terrestrial amphipod/isopod
Reference	12	2004-09-15	September	2004	3	Megalorchestia pugettensis	1	127.324	Terrestrial Amphipod	Terrestrial amphipod/isopod
Reference	12	2004-09-15	September	2004	3	Traskorchestia traskiana	1	127.324	Terrestrial Amphipod	Terrestrial amphipod/isopod
Reference	12	2004-09-15	September	2004	4	Oligochaeta	155	19735.2	Oligochaeta	Oligochaeta
Reference	12	2004-09-15	September	2004	4	Talitridae, juv.	12	1527.88	Terrestrial Amphipod	Terrestrial amphipod/isopod
Reference	12	2004-09-15	September	2004	4	Megalorchestia pugettensis	3	381.971	Terrestrial Amphipod	Terrestrial amphipod/isopod
Reference	12	2004-09-15	September	2004	4	Traskorchestia traskiana	1	127.324	Terrestrial Amphipod	Terrestrial amphipod/isopod
Reference	12	2004-09-15	September	2004	4	Traskorchestia georgiana	1	127.324	Terrestrial Amphipod	Terrestrial amphipod/isopod
Reference	12	2004-09-15	September	2004	4	Nematoda	7	891.266	Nematoda	Nematoda
Reference	12	2004-09-15	September	2004	4	Coleoptera larvae	1	127.324	Insect larvae	Insect, Arachnid, Collembola
Reference	12	2004-09-15	September	2004	4	Staphylinidae	1	127.324	Insect adult	Insect, Arachnid, Collembola
Reference	12	2004-09-15	September	2004	5	Oligochaeta	89	11331.8	Oligochaeta	Oligochaeta
Reference	12	2004-09-15	September	2004	5	Detonella papillicornis	1	127.324	Terrestrial Isopod	Terrestrial amphipod/isopod
Reference	12	2004-09-15	September	2004	5	Talitridae, juv.	19	2419.15	Terrestrial Amphipod	Terrestrial amphipod/isopod
Reference	12	2004-09-15	September	2004	5	Nematoda	8	1018.59	Nematoda	Nematoda
Reference	12	2004-09-15	September	2004	5	Megalorchestia pugettensis	3	381.971	Terrestrial Amphipod	Terrestrial amphipod/isopod
Reference	12	2004-09-15	September	2004	5	Traskorchestia traskiana	5	636.618	Terrestrial Amphipod	Terrestrial amphipod/isopod
Reference	12	2004-09-15	September	2004	6	Talitridae, juv.	29	3692.39	Terrestrial Amphipod	Terrestrial amphipod/isopod
Reference	12	2004-09-15	September	2004	6	Oligochaeta	61	7766.74	Oligochaeta	Oligochaeta
Reference	12	2004-09-15	September	2004	6	Nematoda	7	891.266	Nematoda	Nematoda
Reference	12	2004-09-15	September	2004	6	Traskorchestia traskiana	11	1400.56	Terrestrial Amphipod	Terrestrial amphipod/isopod
Reference	12	2004-09-15	September	2004	6	Traskorchestia georgiana	2	254.647	Terrestrial Amphipod	Terrestrial amphipod/isopod
Reference	12	2004-09-15	September	2004	7	Talitridae, juv.	3	381.971	Terrestrial Amphipod	Terrestrial amphipod/isopod
Reference	12	2004-09-15	September	2004	7	Oligochaeta	114	14514.9	Oligochaeta	Oligochaeta
Reference	12	2004-09-15	September	2004	7	Nematoda	3	381.971	Nematoda	Nematoda
Restored 2005	5	2004-09-15	September	2004	1	Oligochaeta	241	30685	Oligochaeta	Oligochaeta
Restored 2005	5	2004-09-15	September	2004	1	Amphipod, juv.	19	2419.15	Aquatic Amphipod	Aquatic crustacean
Restored 2005	5	2004-09-15	September	2004	1	Mussel, juv.	1	127.324	Bivalve	Mollusk
Restored 2005	5	2004-09-15	September	2004	1	Spionidae	2	254.647	Spionidae	Polychaete
Restored 2005	5	2004-09-15	September	2004	1	Allorchestes sp.	9	1145.91	Aquatic Amphipod	Aquatic crustacean
Restored 2005	5	2004-09-15	September	2004	1	Eogammarus confervicolus	12	1527.88	Aquatic Amphipod	Aquatic crustacean
Restored 2005	5	2004-09-15	September	2004	1	Gnorimosphaeroma oregonense	11	1400.56	Aquatic Isopod	Aquatic crustacean
Restored 2005	5	2004-09-15	September	2004	1	Turbellaria	5	636.618	Turbellaria	Nemertea/Turbellaria
Restored 2005	5	2004-09-15	September	2004	2	Oligochaeta	38	4838.3	Oligochaeta	Oligochaeta
Restored 2005	5	2004-09-15	September	2004	2	Amphipod, juv.	10	1273.24	Aquatic Amphipod	Aquatic crustacean
Restored 2005	5	2004-09-15	September	2004	2	Polychaete	1	127.324	Polychaete, unk.	Polychaete	juv.
Restored 2005	5	2004-09-15	September	2004	2	Eogammarus confervicolus	6	763.942	Aquatic Amphipod	Aquatic crustacean
Restored 2005	5	2004-09-15	September	2004	2	Nematoda	3	381.971	Nematoda	Nematoda
Restored 2005	5	2004-09-15	September	2004	2	Mussel, juv.	1	127.324	Bivalve	Mollusk
Restored 2005	5	2004-09-15	September	2004	2	Turbellaria	3	381.971	Turbellaria	Nemertea/Turbellaria
Restored 2005	5	2004-09-15	September	2004	3	Chironomidae larvae	1	127.324	Insect larvae	Insect, Arachnid, Collembola
Restored 2005	5	2004-09-15	September	2004	3	Oligochaeta	27	3437.74	Oligochaeta	Oligochaeta
Restored 2005	5	2004-09-15	September	2004	3	Polychaete	1	127.324	Polychaete, unk.	Polychaete	juv.
Restored 2005	5	2004-09-15	September	2004	3	Amphipod, juv.	8	1018.59	Aquatic Amphipod	Aquatic crustacean
Restored 2005	5	2004-09-15	September	2004	3	Mussel, juv.	2	254.647	Bivalve	Mollusk
Restored 2005	5	2004-09-15	September	2004	3	Allorchestes sp.	18	2291.83	Aquatic Amphipod	Aquatic crustacean
Restored 2005	5	2004-09-15	September	2004	3	Eogammarus confervicolus	4	509.295	Aquatic Amphipod	Aquatic crustacean
Restored 2005	5	2004-09-15	September	2004	3	Paramoera sp.	1	127.324	Aquatic Amphipod	Aquatic crustacean
Restored 2005	5	2004-09-15	September	2004	3	Gnorimosphaeroma oregonense	3	381.971	Aquatic Isopod	Aquatic crustacean
Restored 2005	5	2004-09-15	September	2004	3	Nematoda	5	636.618	Nematoda	Nematoda
Restored 2005	5	2004-09-15	September	2004	3	Turbellaria	3	381.971	Turbellaria	Nemertea/Turbellaria
Restored 2005	5	2004-09-15	September	2004	4	Allorchestes sp.	37	4710.98	Aquatic Amphipod	Aquatic crustacean
Restored 2005	5	2004-09-15	September	2004	4	Amphipod, juv.	13	1655.21	Aquatic Amphipod	Aquatic crustacean
Restored 2005	5	2004-09-15	September	2004	4	Eogammarus confervicolus	7	891.266	Aquatic Amphipod	Aquatic crustacean
Restored 2005	5	2004-09-15	September	2004	4	Pseudopolydora kempi	2	254.647	Spionidae	Polychaete
Restored 2005	5	2004-09-15	September	2004	4	Eteone sp.	1	127.324	Phyllodocidae	Polychaete
Restored 2005	5	2004-09-15	September	2004	4	Hemipodia simplex	3	381.971	Glyceridae	Polychaete
Restored 2005	5	2004-09-15	September	2004	4	Gnorimosphaeroma oregonense	2	254.647	Aquatic Isopod	Aquatic crustacean
Restored 2005	5	2004-09-15	September	2004	4	Nematoda	3	381.971	Nematoda	Nematoda
Restored 2005	5	2004-09-15	September	2004	4	Oligochaeta	14	1782.53	Oligochaeta	Oligochaeta
Restored 2005	5	2004-09-15	September	2004	4	Turbellaria	3	381.971	Turbellaria	Nemertea/Turbellaria
Restored 2005	5	2004-09-15	September	2004	5	Hemigrapsus oregonensis	2	254.647	Crab	Aquatic crustacean
Restored 2005	5	2004-09-15	September	2004	5	Polychaete	1	127.324	Polychaete, unk.	Polychaete	juv.
Restored 2005	5	2004-09-15	September	2004	5	Hemipodia simplex	1	127.324	Glyceridae	Polychaete
Restored 2005	5	2004-09-15	September	2004	5	Pseudopolydora kempi	3	381.971	Spionidae	Polychaete
Restored 2005	5	2004-09-15	September	2004	5	Amphipod, juv.	18	2291.83	Aquatic Amphipod	Aquatic crustacean
Restored 2005	5	2004-09-15	September	2004	5	Gnorimosphaeroma oregonense	2	254.647	Aquatic Isopod	Aquatic crustacean
Restored 2005	5	2004-09-15	September	2004	5	Nematoda	5	636.618	Nematoda	Nematoda
Restored 2005	5	2004-09-15	September	2004	5	Allorchestes sp.	7	891.266	Aquatic Amphipod	Aquatic crustacean
Restored 2005	5	2004-09-15	September	2004	5	Eogammarus confervicolus	1	127.324	Aquatic Amphipod	Aquatic crustacean
Restored 2005	5	2004-09-15	September	2004	6	Hemigrapsus oregonensis	1	127.324	Crab	Aquatic crustacean
Restored 2005	5	2004-09-15	September	2004	6	Amphipod, juv.	38	4838.3	Aquatic Amphipod	Aquatic crustacean
Restored 2005	5	2004-09-15	September	2004	6	Clam, juv.	1	127.324	Bivalve	Mollusk
Restored 2005	5	2004-09-15	September	2004	6	Mussel, juv.	1	127.324	Bivalve	Mollusk
Restored 2005	5	2004-09-15	September	2004	6	Nematoda	1	127.324	Nematoda	Nematoda
Restored 2005	5	2004-09-15	September	2004	6	Gnorimosphaeroma oregonense	7	891.266	Aquatic Isopod	Aquatic crustacean
Restored 2005	5	2004-09-15	September	2004	6	Polychaete	12	1527.88	Polychaete, unk.	Polychaete	juv.
Restored 2005	5	2004-09-15	September	2004	6	Oligochaeta	6	763.942	Oligochaeta	Oligochaeta
Restored 2005	5	2004-09-15	September	2004	6	Sabellidae	1	127.324	Sabellidae	Polychaete
Restored 2005	5	2004-09-15	September	2004	6	Phoronida	1	127.324	Phoronida	Phoronida
Restored 2005	5	2004-09-15	September	2004	6	Pseudopolydora kempi	4	509.295	Spionidae	Polychaete
Restored 2005	5	2004-09-15	September	2004	6	Syllidae	1	127.324	Syllidae	Polychaete
Restored 2005	5	2004-09-15	September	2004	6	Hemipodia simplex	10	1273.24	Glyceridae	Polychaete
Restored 2005	5	2004-09-15	September	2004	6	Allorchestes sp.	26	3310.42	Aquatic Amphipod	Aquatic crustacean
Restored 2005	5	2004-09-15	September	2004	6	Eogammarus confervicolus	1	127.324	Aquatic Amphipod	Aquatic crustacean
Restored 2005	5	2004-09-15	September	2004	7	Mussel, juv.	2	254.647	Bivalve	Mollusk
Restored 2005	5	2004-09-15	September	2004	7	Hemigrapsus oregonensis	2	254.647	Crab	Aquatic crustacean
Restored 2005	5	2004-09-15	September	2004	7	Amphipod, juv.	18	2291.83	Aquatic Amphipod	Aquatic crustacean
Restored 2005	5	2004-09-15	September	2004	7	Gnorimosphaeroma oregonense	8	1018.59	Aquatic Isopod	Aquatic crustacean
Restored 2005	5	2004-09-15	September	2004	7	Nematoda	10	1273.24	Nematoda	Nematoda
Restored 2005	5	2004-09-15	September	2004	7	Clam, juv.	1	127.324	Bivalve	Mollusk
Restored 2005	5	2004-09-15	September	2004	7	Armandia brevis	1	127.324	Opheliidae	Polychaete
Restored 2005	5	2004-09-15	September	2004	7	Polychaete	1	127.324	Polychaete, unk.	Polychaete	juv.
Restored 2005	5	2004-09-15	September	2004	7	Turbellaria	1	127.324	Turbellaria	Nemertea/Turbellaria
Restored 2005	5	2004-09-15	September	2004	7	Allorchestes sp.	4	509.295	Aquatic Amphipod	Aquatic crustacean
Restored 2005	5	2004-09-15	September	2004	7	Hemipodia simplex	10	1273.24	Glyceridae	Polychaete
Restored 2005	5	2004-09-15	September	2004	7	Cumella vulgaris	1	127.324	Cumacea	Aquatic crustacean
Restored 2005	5	2004-09-15	September	2004	7	Idotea sp.	1	127.324	Aquatic Isopod	Aquatic crustacean
Restored 2005	8	2004-09-15	September	2004	1	Mussel, juv.	2	254.647	Bivalve	Mollusk
Restored 2005	8	2004-09-15	September	2004	1	Oligochaeta	3	381.971	Oligochaeta	Oligochaeta
Restored 2005	8	2004-09-15	September	2004	1	Turbellaria	3	381.971	Turbellaria	Nemertea/Turbellaria
Restored 2005	8	2004-09-15	September	2004	2	Nematoda	14	1782.53	Nematoda	Nematoda
Restored 2005	8	2004-09-15	September	2004	2	Oligochaeta	22	2801.12	Oligochaeta	Oligochaeta
Restored 2005	8	2004-09-15	September	2004	3	Allorchestes sp.	1	127.324	Aquatic Amphipod	Aquatic crustacean
Restored 2005	8	2004-09-15	September	2004	3	Gnorimosphaeroma oregonense	2	254.647	Aquatic Isopod	Aquatic crustacean
Restored 2005	8	2004-09-15	September	2004	3	Nematoda	12	1527.88	Nematoda	Nematoda
Restored 2005	8	2004-09-15	September	2004	3	Oligochaeta	49	6238.86	Oligochaeta	Oligochaeta
Restored 2005	8	2004-09-15	September	2004	4	Nematoda	6	763.942	Nematoda	Nematoda
Restored 2005	8	2004-09-15	September	2004	4	Oligochaeta	7	891.266	Oligochaeta	Oligochaeta
Restored 2005	8	2004-09-15	September	2004	5	Polychaete	1	127.324	Polychaete, unk.	Polychaete	juv.
Restored 2005	8	2004-09-15	September	2004	5	Mussel, juv.	1	127.324	Bivalve	Mollusk
Restored 2005	8	2004-09-15	September	2004	5	Eogammarus confervicolus	1	127.324	Aquatic Amphipod	Aquatic crustacean
Restored 2005	8	2004-09-15	September	2004	5	Gnorimosphaeroma oregonense	8	1018.59	Aquatic Isopod	Aquatic crustacean
Restored 2005	8	2004-09-15	September	2004	5	Oligochaeta	1	127.324	Oligochaeta	Oligochaeta
Restored 2005	8	2004-09-15	September	2004	6	Oligochaeta	24	3055.77	Oligochaeta	Oligochaeta
Restored 2005	8	2004-09-15	September	2004	6	Isotomidae	1	127.324	Collembola	Insect, Arachnid, Collembola
Restored 2005	8	2004-09-15	September	2004	7	Polychaete	1	127.324	Polychaete, unk.	Polychaete	juv.
Restored 2005	8	2004-09-15	September	2004	7	Allorchestes sp.	3	381.971	Aquatic Amphipod	Aquatic crustacean
Restored 2005	8	2004-09-15	September	2004	7	Eogammarus confervicolus	1	127.324	Aquatic Amphipod	Aquatic crustacean
Restored 2005	8	2004-09-15	September	2004	7	Gnorimosphaeroma oregonense	3	381.971	Aquatic Isopod	Aquatic crustacean
Restored 2005	8	2004-09-15	September	2004	7	Oligochaeta	1	127.324	Oligochaeta	Oligochaeta
Reference	5	2006-06-14	June	2006	1	Oligochaeta	34	4329	Oligochaeta	Oligochaeta
Reference	5	2006-06-14	June	2006	1	Nematoda	2	254.647	Nematoda	Nematoda
Reference	5	2006-06-14	June	2006	1	Hemigrapsus oregonensis	2	254.647	Crab	Aquatic crustacean
Reference	5	2006-06-14	June	2006	1	Littorina scutulata	1	127.324	Gastropod	Mollusk	Ref
Reference	5	2006-06-14	June	2006	1	Gnorimosphaeroma oregonense	13	1655.21	Aquatic Isopod	Aquatic crustacean
Reference	5	2006-06-14	June	2006	1	Eogammarus confervicolus	117	14896.9	Aquatic Amphipod	Aquatic crustacean
Reference	5	2006-06-14	June	2006	1	Amphipod, juv.	6	763.942	Aquatic Amphipod	Aquatic crustacean
Reference	5	2006-06-14	June	2006	1	Paramoera sp.	9	1145.91	Aquatic Amphipod	Aquatic crustacean
Reference	5	2006-06-14	June	2006	2	Mussel, juv.	1	127.324	Bivalve	Mollusk
Reference	5	2006-06-14	June	2006	2	Gnorimosphaeroma oregonense	23	2928.44	Aquatic Isopod	Aquatic crustacean
Reference	5	2006-06-14	June	2006	2	Eogammarus confervicolus	35	4456.33	Aquatic Amphipod	Aquatic crustacean
Reference	5	2006-06-14	June	2006	2	Paramoera sp.	29	3692.39	Aquatic Amphipod	Aquatic crustacean
Reference	5	2006-06-14	June	2006	2	Oligochaeta	36	4583.65	Oligochaeta	Oligochaeta
Reference	5	2006-06-14	June	2006	2	Hemigrapsus oregonensis	2	254.647	Crab	Aquatic crustacean
Reference	5	2006-06-14	June	2006	2	Nereidae	1	127.324	Nereidae	Polychaete	juv.
Reference	5	2006-06-14	June	2006	2	Nereis vexillosa	1	127.324	Nereidae	Polychaete
Reference	5	2006-06-14	June	2006	3	Oligochaeta	69	8785.33	Oligochaeta	Oligochaeta
Reference	5	2006-06-14	June	2006	3	Monocorophium acherusicum	1	127.324	Aquatic Amphipod	Aquatic crustacean
Reference	5	2006-06-14	June	2006	3	Amphipod, juv.	2	254.647	Aquatic Amphipod	Aquatic crustacean
Reference	5	2006-06-14	June	2006	3	Paramoera sp.	10	1273.24	Aquatic Amphipod	Aquatic crustacean
Reference	5	2006-06-14	June	2006	3	Gnorimosphaeroma oregonense	10	1273.24	Aquatic Isopod	Aquatic crustacean
Reference	5	2006-06-14	June	2006	3	Eogammarus confervicolus	78	9931.25	Aquatic Amphipod	Aquatic crustacean
Reference	5	2006-06-14	June	2006	4	Gnorimosphaeroma oregonense	46	5856.89	Aquatic Isopod	Aquatic crustacean
Reference	5	2006-06-14	June	2006	4	Nereidae	1	127.324	Nereidae	Polychaete	juv.
Reference	5	2006-06-14	June	2006	4	Mussel, juv.	1	127.324	Bivalve	Mollusk
Reference	5	2006-06-14	June	2006	4	Oligochaeta	42	5347.59	Oligochaeta	Oligochaeta
Reference	5	2006-06-14	June	2006	4	Amphipod, juv.	7	891.266	Aquatic Amphipod	Aquatic crustacean
Reference	5	2006-06-14	June	2006	4	Paramoera sp.	6	763.942	Aquatic Amphipod	Aquatic crustacean
Reference	5	2006-06-14	June	2006	4	Eogammarus confervicolus	129	16424.8	Aquatic Amphipod	Aquatic crustacean
Reference	5	2006-06-14	June	2006	4	Nematoda	1	127.324	Nematoda	Nematoda
Reference	5	2006-06-14	June	2006	5	Hemigrapsus oregonensis	1	127.324	Crab	Aquatic crustacean
Reference	5	2006-06-14	June	2006	5	Oligochaeta	72	9167.3	Oligochaeta	Oligochaeta
Reference	5	2006-06-14	June	2006	5	Nereidae	3	381.971	Nereidae	Polychaete	juv.
Reference	5	2006-06-14	June	2006	5	Amphipod, juv.	11	1400.56	Aquatic Amphipod	Aquatic crustacean
Reference	5	2006-06-14	June	2006	5	Paramoera sp.	2	254.647	Aquatic Amphipod	Aquatic crustacean
Reference	5	2006-06-14	June	2006	5	Gnorimosphaeroma oregonense	5	636.618	Aquatic Isopod	Aquatic crustacean
Reference	5	2006-06-14	June	2006	5	Eogammarus confervicolus	49	6238.86	Aquatic Amphipod	Aquatic crustacean
Reference	5	2006-06-14	June	2006	5	Nematoda	2	254.647	Nematoda	Nematoda
Reference	5	2006-06-14	June	2006	6	Parathalestris californica	1	127.324	Harpacticoid	Aquatic crustacean
Reference	5	2006-06-14	June	2006	6	Oligochaeta	70	8912.66	Oligochaeta	Oligochaeta
Reference	5	2006-06-14	June	2006	6	Nematoda	1	127.324	Nematoda	Nematoda
Reference	5	2006-06-14	June	2006	6	Amphipod, juv.	9	1145.91	Aquatic Amphipod	Aquatic crustacean
Reference	5	2006-06-14	June	2006	6	Paramoera sp.	6	763.942	Aquatic Amphipod	Aquatic crustacean
Reference	5	2006-06-14	June	2006	6	Gnorimosphaeroma oregonense	5	636.618	Aquatic Isopod	Aquatic crustacean
Reference	5	2006-06-14	June	2006	6	Eogammarus confervicolus	77	9803.92	Aquatic Amphipod	Aquatic crustacean
Reference	5	2006-06-14	June	2006	7	Oligochaeta	27	3437.74	Oligochaeta	Oligochaeta
Reference	5	2006-06-14	June	2006	7	Mytilus edulis	1	127.324	Bivalve	Mollusk
Reference	5	2006-06-14	June	2006	7	Nereidae	1	127.324	Nereidae	Polychaete	juv.
Reference	5	2006-06-14	June	2006	7	Neanthes limnicola	1	127.324	Nereidae	Polychaete
Reference	5	2006-06-14	June	2006	7	Amphipod, juv.	13	1655.21	Aquatic Amphipod	Aquatic crustacean
Reference	5	2006-06-14	June	2006	7	Paramoera sp.	25	3183.09	Aquatic Amphipod	Aquatic crustacean
Reference	5	2006-06-14	June	2006	7	Gnorimosphaeroma oregonense	1	127.324	Aquatic Isopod	Aquatic crustacean
Reference	5	2006-06-14	June	2006	7	Eogammarus confervicolus	33	4201.68	Aquatic Amphipod	Aquatic crustacean
Reference	8	2006-06-14	June	2006	1	Nereidae	1	127.324	Nereidae	Polychaete	juv.
Reference	8	2006-06-14	June	2006	1	Turbellaria	4	509.295	Turbellaria	Nemertea/Turbellaria
Reference	8	2006-06-14	June	2006	1	Nematoda	2	254.647	Nematoda	Nematoda
Reference	8	2006-06-14	June	2006	1	Oligochaeta	71	9039.98	Oligochaeta	Oligochaeta
Reference	8	2006-06-14	June	2006	2	Oligochaeta	76	9676.6	Oligochaeta	Oligochaeta
Reference	8	2006-06-14	June	2006	2	Nematoda	2	254.647	Nematoda	Nematoda
Reference	8	2006-06-14	June	2006	2	Turbellaria	3	381.971	Turbellaria	Nemertea/Turbellaria
Reference	8	2006-06-14	June	2006	2	Nereidae	2	254.647	Nereidae	Polychaete	juv.
Reference	8	2006-06-14	June	2006	3	Nereidae	2	254.647	Nereidae	Polychaete	juv.
Reference	8	2006-06-14	June	2006	3	Turbellaria	44	5602.24	Turbellaria	Nemertea/Turbellaria
Reference	8	2006-06-14	June	2006	3	Nematoda	2	254.647	Nematoda	Nematoda
Reference	8	2006-06-14	June	2006	3	Oligochaeta	80	10185.9	Oligochaeta	Oligochaeta
Reference	8	2006-06-14	June	2006	3	Paramoera sp.	1	127.324	Aquatic Amphipod	Aquatic crustacean
Reference	8	2006-06-14	June	2006	4	Nereidae	1	127.324	Nereidae	Polychaete	adult, just front half
Reference	8	2006-06-14	June	2006	4	Nereidae	1	127.324	Nereidae	Polychaete	juv.
Reference	8	2006-06-14	June	2006	4	Turbellaria	16	2037.18	Turbellaria	Nemertea/Turbellaria
Reference	8	2006-06-14	June	2006	4	Nematoda	5	636.618	Nematoda	Nematoda
Reference	8	2006-06-14	June	2006	4	Oligochaeta	59	7512.1	Oligochaeta	Oligochaeta
Reference	8	2006-06-14	June	2006	5	Nereidae	1	127.324	Nereidae	Polychaete	juv.
Reference	8	2006-06-14	June	2006	5	Turbellaria	11	1400.56	Turbellaria	Nemertea/Turbellaria
Reference	8	2006-06-14	June	2006	5	Nematoda	2	254.647	Nematoda	Nematoda
Reference	8	2006-06-14	June	2006	5	Oligochaeta	101	12859.7	Oligochaeta	Oligochaeta
Reference	8	2006-06-14	June	2006	6	Turbellaria	18	2291.83	Turbellaria	Nemertea/Turbellaria
Reference	8	2006-06-14	June	2006	6	Nematoda	7	891.266	Nematoda	Nematoda
Reference	8	2006-06-14	June	2006	6	Oligochaeta	69	8785.33	Oligochaeta	Oligochaeta
Reference	8	2006-06-14	June	2006	7	Oligochaeta	42	5347.59	Oligochaeta	Oligochaeta
Reference	8	2006-06-14	June	2006	7	Nematoda	4	509.295	Nematoda	Nematoda
Reference	8	2006-06-14	June	2006	7	Turbellaria	15	1909.85	Turbellaria	Nemertea/Turbellaria
Reference	12	2006-06-14	June	2006	1	Oligochaeta	34	4329	Oligochaeta	Oligochaeta
Reference	12	2006-06-14	June	2006	1	Nematoda	2	254.647	Nematoda	Nematoda
Reference	12	2006-06-14	June	2006	1	Megalorchestia pugettensis	1	127.324	Terrestrial Amphipod	Terrestrial amphipod/isopod
Reference	12	2006-06-14	June	2006	1	Traskorchestia traskiana	1	127.324	Terrestrial Amphipod	Terrestrial amphipod/isopod
Reference	12	2006-06-14	June	2006	1	Traskorchestia georgiana	1	127.324	Terrestrial Amphipod	Terrestrial amphipod/isopod
Reference	12	2006-06-14	June	2006	1	Talitridae, juv.	17	2164.5	Terrestrial Amphipod	Terrestrial amphipod/isopod
Reference	12	2006-06-14	June	2006	2	Oligochaeta	137	17443.3	Oligochaeta	Oligochaeta
Reference	12	2006-06-14	June	2006	2	Nematoda	9	1145.91	Nematoda	Nematoda
Reference	12	2006-06-14	June	2006	2	Isotomidae	1	127.324	Collembola	Insect, Arachnid, Collembola
Reference	12	2006-06-14	June	2006	2	Talitridae, juv.	17	2164.5	Terrestrial Amphipod	Terrestrial amphipod/isopod
Reference	12	2006-06-14	June	2006	2	Traskorchestia georgiana	4	509.295	Terrestrial Amphipod	Terrestrial amphipod/isopod
Reference	12	2006-06-14	June	2006	3	Oligochaeta	49	6238.86	Oligochaeta	Oligochaeta
Reference	12	2006-06-14	June	2006	3	Nematoda	4	509.295	Nematoda	Nematoda
Reference	12	2006-06-14	June	2006	3	Staphylinidae	1	127.324	Insect adult	Insect, Arachnid, Collembola
Reference	12	2006-06-14	June	2006	3	Ephydridae larvae	1	127.324	Insect larvae	Insect, Arachnid, Collembola	suborder Brachycera…distinguishes this, Dolichopodidae, Empididae, etc from Nematocera: Chironomidae, Ceratopogonidae, etc
Reference	12	2006-06-14	June	2006	3	Nereidae	1	127.324	Nereidae	Polychaete	just head
Reference	12	2006-06-14	June	2006	3	Acari	1	127.324	Arachnid	Insect, Arachnid, Collembola
Reference	12	2006-06-14	June	2006	3	Megalorchestia pugettensis	3	381.971	Terrestrial Amphipod	Terrestrial amphipod/isopod
Reference	12	2006-06-14	June	2006	3	Traskorchestia georgiana	3	381.971	Terrestrial Amphipod	Terrestrial amphipod/isopod
Reference	12	2006-06-14	June	2006	3	Talitridae, juv.	22	2801.12	Terrestrial Amphipod	Terrestrial amphipod/isopod
Reference	12	2006-06-14	June	2006	4	Oligochaeta	48	6111.54	Oligochaeta	Oligochaeta
Reference	12	2006-06-14	June	2006	4	Acari	2	254.647	Arachnid	Insect, Arachnid, Collembola
Reference	12	2006-06-14	June	2006	4	Talitridae, juv.	54	6875.48	Terrestrial Amphipod	Terrestrial amphipod/isopod
Reference	12	2006-06-14	June	2006	4	Nematoda	5	636.618	Nematoda	Nematoda
Reference	12	2006-06-14	June	2006	4	Megalorchestia pugettensis	3	381.971	Terrestrial Amphipod	Terrestrial amphipod/isopod
Reference	12	2006-06-14	June	2006	4	Traskorchestia georgiana	3	381.971	Terrestrial Amphipod	Terrestrial amphipod/isopod
Reference	12	2006-06-14	June	2006	5	Oligochaeta	64	8148.71	Oligochaeta	Oligochaeta
Reference	12	2006-06-14	June	2006	5	Nematoda	6	763.942	Nematoda	Nematoda
Reference	12	2006-06-14	June	2006	5	Talitridae, juv.	69	8785.33	Terrestrial Amphipod	Terrestrial amphipod/isopod
Reference	12	2006-06-14	June	2006	5	Megalorchestia pugettensis	1	127.324	Terrestrial Amphipod	Terrestrial amphipod/isopod
Reference	12	2006-06-14	June	2006	5	Traskorchestia georgiana	2	254.647	Terrestrial Amphipod	Terrestrial amphipod/isopod
Reference	12	2006-06-14	June	2006	5	Traskorchestia traskiana	1	127.324	Terrestrial Amphipod	Terrestrial amphipod/isopod
Reference	12	2006-06-14	June	2006	6	Oligochaeta	63	8021.39	Oligochaeta	Oligochaeta
Reference	12	2006-06-14	June	2006	6	Nematoda	4	509.295	Nematoda	Nematoda
Reference	12	2006-06-14	June	2006	6	Talitridae, juv.	93	11841.1	Terrestrial Amphipod	Terrestrial amphipod/isopod
Reference	12	2006-06-14	June	2006	6	Chironomidae larvae	1	127.324	Insect larvae	Insect, Arachnid, Collembola
Reference	12	2006-06-14	June	2006	6	Megalorchestia pugettensis	1	127.324	Terrestrial Amphipod	Terrestrial amphipod/isopod
Reference	12	2006-06-14	June	2006	6	Traskorchestia traskiana	5	636.618	Terrestrial Amphipod	Terrestrial amphipod/isopod
Reference	12	2006-06-14	June	2006	7	Oligochaeta	73	9294.63	Oligochaeta	Oligochaeta
Reference	12	2006-06-14	June	2006	7	Nematoda	5	636.618	Nematoda	Nematoda
Reference	12	2006-06-14	June	2006	7	Acari	1	127.324	Arachnid	Insect, Arachnid, Collembola
Reference	12	2006-06-14	June	2006	7	Traskorchestia traskiana	1	127.324	Terrestrial Amphipod	Terrestrial amphipod/isopod
Reference	12	2006-06-14	June	2006	7	Talitridae, juv.	37	4710.98	Terrestrial Amphipod	Terrestrial amphipod/isopod
Restored 2005	5	2006-06-14	June	2006	1	Mussel, juv.	1	127.324	Bivalve	Mollusk	sediment smaller then ref, more gravel, less interstial spaces?
Restored 2005	5	2006-06-14	June	2006	1	Hemipodia simplex	5	636.618	Glyceridae	Polychaete
Restored 2005	5	2006-06-14	June	2006	1	Nematoda	9	1145.91	Nematoda	Nematoda
Restored 2005	5	2006-06-14	June	2006	1	Oligochaeta	2	254.647	Oligochaeta	Oligochaeta
Restored 2005	5	2006-06-14	June	2006	2	Exosphaeroma inornata	20	2546.47	Aquatic Isopod	Aquatic crustacean
Restored 2005	5	2006-06-14	June	2006	2	Staphylinidae	1	127.324	Insect adult	Insect, Arachnid, Collembola
Restored 2005	5	2006-06-14	June	2006	2	Harpacticus sp.	1	127.324	Harpacticoid	Aquatic crustacean
Restored 2005	5	2006-06-14	June	2006	2	Hypogastruridae	1	127.324	Collembola	Insect, Arachnid, Collembola
Restored 2005	5	2006-06-14	June	2006	2	Hemipodia simplex	1	127.324	Glyceridae	Polychaete
Restored 2005	5	2006-06-14	June	2006	2	Nematoda	8	1018.59	Nematoda	Nematoda
Restored 2005	5	2006-06-14	June	2006	2	Oligochaeta	1	127.324	Oligochaeta	Oligochaeta
Restored 2005	5	2006-06-14	June	2006	3	Mussel, juv.	1	127.324	Bivalve	Mollusk
Restored 2005	5	2006-06-14	June	2006	3	Isotomidae	1	127.324	Collembola	Insect, Arachnid, Collembola
Restored 2005	5	2006-06-14	June	2006	3	Hemipodia simplex	17	2164.5	Glyceridae	Polychaete
Restored 2005	5	2006-06-14	June	2006	3	Nematoda	20	2546.47	Nematoda	Nematoda
Restored 2005	5	2006-06-14	June	2006	3	Oligochaeta	3	381.971	Oligochaeta	Oligochaeta
Restored 2005	5	2006-06-14	June	2006	4	Mytilus edulis	2	254.647	Bivalve	Mollusk
Restored 2005	5	2006-06-14	June	2006	4	Clam, juv.	2	254.647	Bivalve	Mollusk
Restored 2005	5	2006-06-14	June	2006	4	Hypogastruridae	2	254.647	Collembola	Insect, Arachnid, Collembola
Restored 2005	5	2006-06-14	June	2006	4	Mussel, juv.	1	127.324	Bivalve	Mollusk
Restored 2005	5	2006-06-14	June	2006	4	Hemipodia simplex	24	3055.77	Glyceridae	Polychaete
Restored 2005	5	2006-06-14	June	2006	4	Nematoda	15	1909.85	Nematoda	Nematoda
Restored 2005	5	2006-06-14	June	2006	5	Hemigrapsus oregonensis	3	381.971	Crab	Aquatic crustacean
Restored 2005	5	2006-06-14	June	2006	5	Gnorimosphaeroma oregonense	1	127.324	Aquatic Isopod	Aquatic crustacean
Restored 2005	5	2006-06-14	June	2006	5	Mussel, juv.	2	254.647	Bivalve	Mollusk
Restored 2005	5	2006-06-14	June	2006	5	Clam, juv.	1	127.324	Bivalve	Mollusk
Restored 2005	5	2006-06-14	June	2006	5	Hemipodia simplex	3	381.971	Glyceridae	Polychaete
Restored 2005	5	2006-06-14	June	2006	5	Nematoda	4	509.295	Nematoda	Nematoda
Restored 2005	5	2006-06-14	June	2006	5	Oligochaeta	1	127.324	Oligochaeta	Oligochaeta
Restored 2005	5	2006-06-14	June	2006	6	Exosphaeroma inornata	3	381.971	Aquatic Isopod	Aquatic crustacean
Restored 2005	5	2006-06-14	June	2006	6	Hemipodia simplex	4	509.295	Glyceridae	Polychaete
Restored 2005	5	2006-06-14	June	2006	6	Nematoda	9	1145.91	Nematoda	Nematoda
Restored 2005	5	2006-06-14	June	2006	7	Hemigrapsus oregonensis	7	891.266	Crab	Aquatic crustacean
Restored 2005	5	2006-06-14	June	2006	7	Parathalestris californica	1	127.324	Harpacticoid	Aquatic crustacean
Restored 2005	5	2006-06-14	June	2006	7	Hemipodia simplex	9	1145.91	Glyceridae	Polychaete
Restored 2005	5	2006-06-14	June	2006	7	Nematoda	10	1273.24	Nematoda	Nematoda
Restored 2005	8	2006-06-14	June	2006	1	Acari	1	127.324	Arachnid	Insect, Arachnid, Collembola
Restored 2005	8	2006-06-14	June	2006	1	Hypogastruridae	2	254.647	Collembola	Insect, Arachnid, Collembola
Restored 2005	8	2006-06-14	June	2006	1	Oligochaeta	18	2291.83	Oligochaeta	Oligochaeta
Restored 2005	8	2006-06-14	June	2006	1	Turbellaria	2	254.647	Turbellaria	Nemertea/Turbellaria
Restored 2005	8	2006-06-14	June	2006	1	Nematoda	8	1018.59	Nematoda	Nematoda
Restored 2005	8	2006-06-14	June	2006	2	Turbellaria	1	127.324	Turbellaria	Nemertea/Turbellaria
Restored 2005	8	2006-06-14	June	2006	2	Nematoda	4	509.295	Nematoda	Nematoda
Restored 2005	8	2006-06-14	June	2006	2	Oligochaeta	21	2673.8	Oligochaeta	Oligochaeta
Restored 2005	8	2006-06-14	June	2006	3	Clam, juv.	1	127.324	Bivalve	Mollusk
Restored 2005	8	2006-06-14	June	2006	3	Oligochaeta	21	2673.8	Oligochaeta	Oligochaeta
Restored 2005	8	2006-06-14	June	2006	3	Nematoda	3	381.971	Nematoda	Nematoda
Restored 2005	8	2006-06-14	June	2006	4	Oligochaeta	15	1909.85	Oligochaeta	Oligochaeta
Restored 2005	8	2006-06-14	June	2006	4	Nematoda	6	763.942	Nematoda	Nematoda
Restored 2005	8	2006-06-14	June	2006	5	Hypogastruridae	1	127.324	Collembola	Insect, Arachnid, Collembola
Restored 2005	8	2006-06-14	June	2006	5	Clam, juv.	1	127.324	Bivalve	Mollusk
Restored 2005	8	2006-06-14	June	2006	5	Nematoda	8	1018.59	Nematoda	Nematoda
Restored 2005	8	2006-06-14	June	2006	5	Oligochaeta	16	2037.18	Oligochaeta	Oligochaeta
Restored 2005	8	2006-06-14	June	2006	6	Hypogastruridae	2	254.647	Collembola	Insect, Arachnid, Collembola
Restored 2005	8	2006-06-14	June	2006	6	Staphylinidae	1	127.324	Insect adult	Insect, Arachnid, Collembola
Restored 2005	8	2006-06-14	June	2006	6	Oligochaeta	7	891.266	Oligochaeta	Oligochaeta
Restored 2005	8	2006-06-14	June	2006	6	Nematoda	14	1782.53	Nematoda	Nematoda
Restored 2005	8	2006-06-14	June	2006	7	Clam, juv.	1	127.324	Bivalve	Mollusk
Restored 2005	8	2006-06-14	June	2006	7	Hypogastruridae	1	127.324	Collembola	Insect, Arachnid, Collembola
Restored 2005	8	2006-06-14	June	2006	7	Oligochaeta	6	763.942	Oligochaeta	Oligochaeta
Restored 2005	8	2006-06-14	June	2006	7	Nematoda	9	1145.91	Nematoda	Nematoda
Restored 2005	12	2006-06-14	June	2006	1	Ostracoda	1	127.324	Ostracoda	Aquatic crustacean	lots of algae in sample
Restored 2005	12	2006-06-14	June	2006	1	Chironomidae larvae	1	127.324	Insect larvae	Insect, Arachnid, Collembola
Restored 2005	12	2006-06-14	June	2006	1	Acari	1	127.324	Arachnid	Insect, Arachnid, Collembola
Restored 2005	12	2006-06-14	June	2006	1	Platynereis bicanaliculata	1	127.324	Nereidae	Polychaete
Restored 2005	12	2006-06-14	June	2006	1	Muscidae larvae	6	763.942	Insect larvae	Insect, Arachnid, Collembola
Restored 2005	12	2006-06-14	June	2006	1	Ephydridae larvae	10	1273.24	Insect larvae	Insect, Arachnid, Collembola
Restored 2005	12	2006-06-14	June	2006	1	Talitridae, juv.	41	5220.27	Terrestrial Amphipod	Terrestrial amphipod/isopod
Restored 2005	12	2006-06-14	June	2006	1	Nematoda	2	254.647	Nematoda	Nematoda
Restored 2005	12	2006-06-14	June	2006	1	Oligochaeta	32	4074.36	Oligochaeta	Oligochaeta
Restored 2005	12	2006-06-14	June	2006	2	Collembola	1	127.324	Collembola	Insect, Arachnid, Collembola
Restored 2005	12	2006-06-14	June	2006	2	Capitellidae	1	127.324	Capitellidae	Polychaete
Restored 2005	12	2006-06-14	June	2006	2	Oligochaeta	37	4710.98	Oligochaeta	Oligochaeta
Restored 2005	12	2006-06-14	June	2006	2	Nematoda	3	381.971	Nematoda	Nematoda
Restored 2005	12	2006-06-14	June	2006	2	Traskorchestia traskiana	1	127.324	Terrestrial Amphipod	Terrestrial amphipod/isopod
Restored 2005	12	2006-06-14	June	2006	3	Acari	1	127.324	Arachnid	Insect, Arachnid, Collembola
Restored 2005	12	2006-06-14	June	2006	3	Oligochaeta	55	7002.8	Oligochaeta	Oligochaeta
Restored 2005	12	2006-06-14	June	2006	3	Nematoda	1	127.324	Nematoda	Nematoda
Restored 2005	12	2006-06-14	June	2006	3	Staphylinidae	2	254.647	Insect adult	Insect, Arachnid, Collembola
Restored 2005	12	2006-06-14	June	2006	3	Talitridae, juv.	2	254.647	Terrestrial Amphipod	Terrestrial amphipod/isopod
Restored 2005	12	2006-06-14	June	2006	3	Isopod, juv.	1	127.324	Aquatic Isopod	Aquatic crustacean
Restored 2005	12	2006-06-14	June	2006	4	Chironomidae larvae	1	127.324	Insect larvae	Insect, Arachnid, Collembola
Restored 2005	12	2006-06-14	June	2006	4	Oligochaeta	39	4965.62	Oligochaeta	Oligochaeta
Restored 2005	12	2006-06-14	June	2006	4	Nematoda	3	381.971	Nematoda	Nematoda
Restored 2005	12	2006-06-14	June	2006	4	Staphylinidae	1	127.324	Insect adult	Insect, Arachnid, Collembola
Restored 2005	12	2006-06-14	June	2006	4	Leptochelia savignyi	1	127.324	Tanaidacea	Aquatic crustacean
Restored 2005	12	2006-06-14	June	2006	4	Isopod, juv.	1	127.324	Aquatic Isopod	Aquatic crustacean
Restored 2005	12	2006-06-14	June	2006	4	Hypogastruridae	2	254.647	Collembola	Insect, Arachnid, Collembola
Restored 2005	12	2006-06-14	June	2006	5	Acari	1	127.324	Arachnid	Insect, Arachnid, Collembola
Restored 2005	12	2006-06-14	June	2006	5	Talitridae, juv.	3	381.971	Terrestrial Amphipod	Terrestrial amphipod/isopod
Restored 2005	12	2006-06-14	June	2006	5	Oligochaeta	18	2291.83	Oligochaeta	Oligochaeta
Restored 2005	12	2006-06-14	June	2006	5	Nematoda	2	254.647	Nematoda	Nematoda
Restored 2005	12	2006-06-14	June	2006	5	Hypogastruridae	1	127.324	Collembola	Insect, Arachnid, Collembola
Restored 2005	12	2006-06-14	June	2006	6	Mussel, juv.	1	127.324	Bivalve	Mollusk
Restored 2005	12	2006-06-14	June	2006	6	Oligochaeta	41	5220.27	Oligochaeta	Oligochaeta
Restored 2005	12	2006-06-14	June	2006	6	Nematoda	1	127.324	Nematoda	Nematoda
Restored 2005	12	2006-06-14	June	2006	6	Talitridae, juv.	13	1655.21	Terrestrial Amphipod	Terrestrial amphipod/isopod
Restored 2005	12	2006-06-14	June	2006	6	Traskorchestia traskiana	4	509.295	Terrestrial Amphipod	Terrestrial amphipod/isopod
Restored 2005	12	2006-06-14	June	2006	7	Oligochaeta	40	5092.95	Oligochaeta	Oligochaeta
Restored 2005	12	2006-06-14	June	2006	7	Nematoda	1	127.324	Nematoda	Nematoda
Reference	5	2006-07-13	July	2006	1	Exosphaeroma inornata	1	127.324	Aquatic Isopod	Aquatic crustacean
Reference	5	2006-07-13	July	2006	1	Amphipod, juv.	12	1527.88	Aquatic Amphipod	Aquatic crustacean
Reference	5	2006-07-13	July	2006	1	Eogammarus confervicolus	100	12732.4	Aquatic Amphipod	Aquatic crustacean
Reference	5	2006-07-13	July	2006	1	Oligochaeta	63	8021.39	Oligochaeta	Oligochaeta
Reference	5	2006-07-13	July	2006	1	Nematoda	1	127.324	Nematoda	Nematoda
Reference	5	2006-07-13	July	2006	2	Gnorimosphaeroma oregonense	1	127.324	Aquatic Isopod	Aquatic crustacean
Reference	5	2006-07-13	July	2006	2	Exosphaeroma inornata	1	127.324	Aquatic Isopod	Aquatic crustacean
Reference	5	2006-07-13	July	2006	2	Nereidae	1	127.324	Nereidae	Polychaete	juv.
Reference	5	2006-07-13	July	2006	2	Talitridae, juv.	1	127.324	Terrestrial Amphipod	Terrestrial amphipod/isopod
Reference	5	2006-07-13	July	2006	2	Oligochaeta	33	4201.68	Oligochaeta	Oligochaeta
Reference	5	2006-07-13	July	2006	2	Amphipod, juv.	2	254.647	Aquatic Amphipod	Aquatic crustacean
Reference	5	2006-07-13	July	2006	2	Eogammarus confervicolus	78	9931.25	Aquatic Amphipod	Aquatic crustacean
Reference	5	2006-07-13	July	2006	3	Spionidae	1	127.324	Spionidae	Polychaete	juv.
Reference	5	2006-07-13	July	2006	3	Oligochaeta	45	5729.56	Oligochaeta	Oligochaeta
Reference	5	2006-07-13	July	2006	3	Amphipod, juv.	2	254.647	Aquatic Amphipod	Aquatic crustacean
Reference	5	2006-07-13	July	2006	3	Eogammarus confervicolus	85	10822.5	Aquatic Amphipod	Aquatic crustacean
Reference	5	2006-07-13	July	2006	3	Gnorimosphaeroma oregonense	1	127.324	Aquatic Isopod	Aquatic crustacean
Reference	5	2006-07-13	July	2006	4	Hemigrapsus oregonensis	1	127.324	Crab	Aquatic crustacean
Reference	5	2006-07-13	July	2006	4	Gnorimosphaeroma oregonense	1	127.324	Aquatic Isopod	Aquatic crustacean
Reference	5	2006-07-13	July	2006	4	Paramoera sp.	1	127.324	Aquatic Amphipod	Aquatic crustacean
Reference	5	2006-07-13	July	2006	4	Oligochaeta	52	6620.83	Oligochaeta	Oligochaeta
Reference	5	2006-07-13	July	2006	4	Amphipod, juv.	1	127.324	Aquatic Amphipod	Aquatic crustacean
Reference	5	2006-07-13	July	2006	4	Eogammarus confervicolus	92	11713.8	Aquatic Amphipod	Aquatic crustacean
Reference	5	2006-07-13	July	2006	5	Mytilus edulis	1	127.324	Bivalve	Mollusk
Reference	5	2006-07-13	July	2006	5	Nereidae	1	127.324	Nereidae	Polychaete	anterior part only
Reference	5	2006-07-13	July	2006	5	Chironomidae larvae	1	127.324	Insect larvae	Insect, Arachnid, Collembola
Reference	5	2006-07-13	July	2006	5	Mussel, juv.	1	127.324	Bivalve	Mollusk
Reference	5	2006-07-13	July	2006	5	Eogammarus confervicolus	48	6111.54	Aquatic Amphipod	Aquatic crustacean
Reference	5	2006-07-13	July	2006	5	Paramoera sp.	1	127.324	Aquatic Amphipod	Aquatic crustacean
Reference	5	2006-07-13	July	2006	5	Oligochaeta	48	6111.54	Oligochaeta	Oligochaeta
Reference	5	2006-07-13	July	2006	5	Nereidae	69	8785.33	Nereidae	Polychaete	juv.
Reference	5	2006-07-13	July	2006	5	Corophiidae, juv.	4	509.295	Aquatic Amphipod	Aquatic crustacean
Reference	5	2006-07-13	July	2006	6	Hemigrapsus oregonensis	1	127.324	Crab	Aquatic crustacean
Reference	5	2006-07-13	July	2006	6	Gnorimosphaeroma oregonense	3	381.971	Aquatic Isopod	Aquatic crustacean
Reference	5	2006-07-13	July	2006	6	Nereidae	1	127.324	Nereidae	Polychaete	juv.
Reference	5	2006-07-13	July	2006	6	Monocorophium acherusicum	2	254.647	Aquatic Amphipod	Aquatic crustacean
Reference	5	2006-07-13	July	2006	6	Oligochaeta	47	5984.21	Oligochaeta	Oligochaeta
Reference	5	2006-07-13	July	2006	6	Nematoda	1	127.324	Nematoda	Nematoda
Reference	5	2006-07-13	July	2006	6	Paramoera sp.	2	254.647	Aquatic Amphipod	Aquatic crustacean
Reference	5	2006-07-13	July	2006	6	Gnorimosphaeroma oregonense	3	381.971	Aquatic Isopod	Aquatic crustacean
Reference	5	2006-07-13	July	2006	6	Eogammarus confervicolus	70	8912.66	Aquatic Amphipod	Aquatic crustacean
Reference	5	2006-07-13	July	2006	7	Nereis vexillosa	1	127.324	Nereidae	Polychaete
Reference	5	2006-07-13	July	2006	7	Oligochaeta	58	7384.77	Oligochaeta	Oligochaeta
Reference	5	2006-07-13	July	2006	7	Nematoda	1	127.324	Nematoda	Nematoda
Reference	5	2006-07-13	July	2006	7	Gnorimosphaeroma oregonense	1	127.324	Aquatic Isopod	Aquatic crustacean
Reference	5	2006-07-13	July	2006	7	Monocorophium acherusicum	1	127.324	Aquatic Amphipod	Aquatic crustacean
Reference	8	2006-07-13	July	2006	1	Protodriloides chaetifer	185	23554.9	Archiannelida	Polychaete	Archiannelida
Reference	8	2006-07-13	July	2006	1	Turbellaria	166	21135.7	Turbellaria	Nemertea/Turbellaria
Reference	8	2006-07-13	July	2006	1	Nematoda	59	7512.1	Nematoda	Nematoda
Reference	8	2006-07-13	July	2006	1	Oligochaeta	258	32849.5	Oligochaeta	Oligochaeta
Reference	8	2006-07-13	July	2006	2	Oligochaeta	148	18843.9	Oligochaeta	Oligochaeta
Reference	8	2006-07-13	July	2006	2	Nematoda	19	2419.15	Nematoda	Nematoda
Reference	8	2006-07-13	July	2006	2	Turbellaria	146	18589.3	Turbellaria	Nemertea/Turbellaria
Reference	8	2006-07-13	July	2006	2	Protodriloides chaetifer	55	7002.8	Archiannelida	Polychaete
Reference	8	2006-07-13	July	2006	2	Nemertea	12	1527.88	Nemertea	Nemertea/Turbellaria
Reference	8	2006-07-13	July	2006	3	Neanthes limnicola	1	127.324	Nereidae	Polychaete
Reference	8	2006-07-13	July	2006	3	Oligochaeta	231	29411.8	Oligochaeta	Oligochaeta
Reference	8	2006-07-13	July	2006	3	Nematoda	43	5474.92	Nematoda	Nematoda
Reference	8	2006-07-13	July	2006	3	Turbellaria	40	5092.95	Turbellaria	Nemertea/Turbellaria
Reference	8	2006-07-13	July	2006	3	Protodriloides chaetifer	20	2546.47	Archiannelida	Polychaete
Reference	8	2006-07-13	July	2006	3	Nemertea	23	2928.44	Nemertea	Nemertea/Turbellaria
Reference	8	2006-07-13	July	2006	3	Amphipod, juv.	1	127.324	Aquatic Amphipod	Aquatic crustacean
Reference	8	2006-07-13	July	2006	4	Nereidae	4	509.295	Nereidae	Polychaete	juv.
Reference	8	2006-07-13	July	2006	4	Nemertea	14	1782.53	Nemertea	Nemertea/Turbellaria
Reference	8	2006-07-13	July	2006	4	Protodriloides chaetifer	2	254.647	Archiannelida	Polychaete
Reference	8	2006-07-13	July	2006	4	Turbellaria	22	2801.12	Turbellaria	Nemertea/Turbellaria
Reference	8	2006-07-13	July	2006	4	Nematoda	19	2419.15	Nematoda	Nematoda
Reference	8	2006-07-13	July	2006	4	Oligochaeta	129	16424.8	Oligochaeta	Oligochaeta
Reference	8	2006-07-13	July	2006	5	Nereidae	2	254.647	Nereidae	Polychaete	juv.
Reference	8	2006-07-13	July	2006	5	Acari	2	254.647	Arachnid	Insect, Arachnid, Collembola
Reference	8	2006-07-13	July	2006	5	Talitridae, juv.	26	3310.42	Terrestrial Amphipod	Terrestrial amphipod/isopod
Reference	8	2006-07-13	July	2006	5	Oligochaeta	186	23682.2	Oligochaeta	Oligochaeta
Reference	8	2006-07-13	July	2006	5	Nematoda	55	7002.8	Nematoda	Nematoda
Reference	8	2006-07-13	July	2006	5	Turbellaria	55	7002.8	Turbellaria	Nemertea/Turbellaria
Reference	8	2006-07-13	July	2006	5	Protodriloides chaetifer	3	381.971	Archiannelida	Polychaete
Reference	8	2006-07-13	July	2006	5	Nemertea	15	1909.85	Nemertea	Nemertea/Turbellaria
Reference	8	2006-07-13	July	2006	5	Traskorchestia traskiana	6	763.942	Terrestrial Amphipod	Terrestrial amphipod/isopod
Reference	8	2006-07-13	July	2006	6	Capitellidae	1	127.324	Capitellidae	Polychaete
Reference	8	2006-07-13	July	2006	6	Neanthes limnicola	3	381.971	Nereidae	Polychaete
Reference	8	2006-07-13	July	2006	6	Traskorchestia traskiana	1	127.324	Terrestrial Amphipod	Terrestrial amphipod/isopod
Reference	8	2006-07-13	July	2006	6	Oligochaeta	141	17952.6	Oligochaeta	Oligochaeta
Reference	8	2006-07-13	July	2006	6	Nematoda	31	3947.03	Nematoda	Nematoda
Reference	8	2006-07-13	July	2006	6	Turbellaria	34	4329	Turbellaria	Nemertea/Turbellaria
Reference	8	2006-07-13	July	2006	6	Protodriloides chaetifer	3	381.971	Archiannelida	Polychaete
Reference	8	2006-07-13	July	2006	6	Nemertea	9	1145.91	Nemertea	Nemertea/Turbellaria
Reference	8	2006-07-13	July	2006	7	Chironomidae adult	1	127.324	Insect adult	Insect, Arachnid, Collembola
Reference	8	2006-07-13	July	2006	7	Neanthes limnicola	1	127.324	Nereidae	Polychaete
Reference	8	2006-07-13	July	2006	7	Oligochaeta	348	44308.6	Oligochaeta	Oligochaeta
Reference	8	2006-07-13	July	2006	7	Nematoda	22	2801.12	Nematoda	Nematoda
Reference	8	2006-07-13	July	2006	7	Turbellaria	27	3437.74	Turbellaria	Nemertea/Turbellaria
Reference	8	2006-07-13	July	2006	7	Protodriloides chaetifer	2	254.647	Archiannelida	Polychaete
Reference	8	2006-07-13	July	2006	7	Traskorchestia traskiana	11	1400.56	Terrestrial Amphipod	Terrestrial amphipod/isopod
Reference	8	2006-07-13	July	2006	7	Talitridae, juv.	3	381.971	Terrestrial Amphipod	Terrestrial amphipod/isopod
Reference	12	2006-07-13	July	2006	1	Staphylinidae	1	127.324	Insect adult	Insect, Arachnid, Collembola
Reference	12	2006-07-13	July	2006	1	Megalorchestia pugettensis	1	127.324	Terrestrial Amphipod	Terrestrial amphipod/isopod
Reference	12	2006-07-13	July	2006	1	Talitridae, juv.	10	1273.24	Terrestrial Amphipod	Terrestrial amphipod/isopod
Reference	12	2006-07-13	July	2006	1	Nemertea	1	127.324	Nemertea	Nemertea/Turbellaria
Reference	12	2006-07-13	July	2006	1	Nematoda	15	1909.85	Nematoda	Nematoda
Reference	12	2006-07-13	July	2006	1	Oligochaeta	63	8021.39	Oligochaeta	Oligochaeta
Reference	12	2006-07-13	July	2006	2	Talitridae, juv.	59	7512.1	Terrestrial Amphipod	Terrestrial amphipod/isopod
Reference	12	2006-07-13	July	2006	2	Nemertea	16	2037.18	Nemertea	Nemertea/Turbellaria
Reference	12	2006-07-13	July	2006	2	Acari	1	127.324	Arachnid	Insect, Arachnid, Collembola
Reference	12	2006-07-13	July	2006	2	Nematoda	7	891.266	Nematoda	Nematoda
Reference	12	2006-07-13	July	2006	2	Oligochaeta	45	5729.56	Oligochaeta	Oligochaeta
Reference	12	2006-07-13	July	2006	3	Traskorchestia traskiana	2	254.647	Terrestrial Amphipod	Terrestrial amphipod/isopod
Reference	12	2006-07-13	July	2006	3	Talitridae, juv.	9	1145.91	Terrestrial Amphipod	Terrestrial amphipod/isopod
Reference	12	2006-07-13	July	2006	3	Acari	1	127.324	Arachnid	Insect, Arachnid, Collembola
Reference	12	2006-07-13	July	2006	3	Cardiidae, juv.	1	127.324	Bivalve	Mollusk
Reference	12	2006-07-13	July	2006	3	Nemertea	11	1400.56	Nemertea	Nemertea/Turbellaria
Reference	12	2006-07-13	July	2006	3	Nematoda	7	891.266	Nematoda	Nematoda
Reference	12	2006-07-13	July	2006	3	Oligochaeta	40	5092.95	Oligochaeta	Oligochaeta
Reference	12	2006-07-13	July	2006	4	Talitridae, juv.	21	2673.8	Terrestrial Amphipod	Terrestrial amphipod/isopod
Reference	12	2006-07-13	July	2006	4	Megalorchestia pugettensis	1	127.324	Terrestrial Amphipod	Terrestrial amphipod/isopod
Reference	12	2006-07-13	July	2006	4	Traskorchestia traskiana	2	254.647	Terrestrial Amphipod	Terrestrial amphipod/isopod
Reference	12	2006-07-13	July	2006	4	Nemertea	8	1018.59	Nemertea	Nemertea/Turbellaria
Reference	12	2006-07-13	July	2006	4	Nematoda	13	1655.21	Nematoda	Nematoda
Reference	12	2006-07-13	July	2006	4	Oligochaeta	23	2928.44	Oligochaeta	Oligochaeta
Reference	12	2006-07-13	July	2006	5	Talitridae, juv.	44	5602.24	Terrestrial Amphipod	Terrestrial amphipod/isopod
Reference	12	2006-07-13	July	2006	5	Megalorchestia pugettensis	7	891.266	Terrestrial Amphipod	Terrestrial amphipod/isopod
Reference	12	2006-07-13	July	2006	5	Acari	14	1782.53	Arachnid	Insect, Arachnid, Collembola
Reference	12	2006-07-13	July	2006	5	Nematoda	32	4074.36	Nematoda	Nematoda
Reference	12	2006-07-13	July	2006	5	Oligochaeta	50	6366.18	Oligochaeta	Oligochaeta
Reference	12	2006-07-13	July	2006	6	Talitridae, juv.	10	1273.24	Terrestrial Amphipod	Terrestrial amphipod/isopod
Reference	12	2006-07-13	July	2006	6	Megalorchestia pugettensis	83	10567.9	Terrestrial Amphipod	Terrestrial amphipod/isopod
Reference	12	2006-07-13	July	2006	6	Chironomidae adult	1	127.324	Insect adult	Insect, Arachnid, Collembola
Reference	12	2006-07-13	July	2006	6	Nereidae	1	127.324	Nereidae	Polychaete	juv.
Reference	12	2006-07-13	July	2006	6	Acari	1	127.324	Arachnid	Insect, Arachnid, Collembola
Reference	12	2006-07-13	July	2006	6	Araneae	1	127.324	Arachnid	Insect, Arachnid, Collembola
Reference	12	2006-07-13	July	2006	6	Nemertea	9	1145.91	Nemertea	Nemertea/Turbellaria
Reference	12	2006-07-13	July	2006	6	Nematoda	17	2164.5	Nematoda	Nematoda
Reference	12	2006-07-13	July	2006	6	Oligochaeta	71	9039.98	Oligochaeta	Oligochaeta
Reference	12	2006-07-13	July	2006	7	Talitridae, juv.	48	6111.54	Terrestrial Amphipod	Terrestrial amphipod/isopod
Reference	12	2006-07-13	July	2006	7	Megalorchestia pugettensis	8	1018.59	Terrestrial Amphipod	Terrestrial amphipod/isopod
Reference	12	2006-07-13	July	2006	7	Cicadellidae	1	127.324	Insect adult	Insect, Arachnid, Collembola
Reference	12	2006-07-13	July	2006	7	Nemertea	14	1782.53	Nemertea	Nemertea/Turbellaria
Reference	12	2006-07-13	July	2006	7	Acari	1	127.324	Arachnid	Insect, Arachnid, Collembola
Reference	12	2006-07-13	July	2006	7	Nematoda	29	3692.39	Nematoda	Nematoda
Reference	12	2006-07-13	July	2006	7	Oligochaeta	52	6620.83	Oligochaeta	Oligochaeta
Reference	12	2006-07-13	July	2006	7	Ephydridae larvae	1	127.324	Insect larvae	Insect, Arachnid, Collembola
Restored 2005	5	2006-07-13	July	2006	1	Exosphaeroma inornata	3	381.971	Aquatic Isopod	Aquatic crustacean
Restored 2005	5	2006-07-13	July	2006	1	Hemipodia simplex	22	2801.12	Glyceridae	Polychaete
Restored 2005	5	2006-07-13	July	2006	1	Chironomidae adult	1	127.324	Insect adult	Insect, Arachnid, Collembola
Restored 2005	5	2006-07-13	July	2006	1	Amphipod, juv.	1	127.324	Aquatic Amphipod	Aquatic crustacean
Restored 2005	5	2006-07-13	July	2006	1	Nematoda	10	1273.24	Nematoda	Nematoda
Restored 2005	5	2006-07-13	July	2006	1	Oligochaeta	2	254.647	Oligochaeta	Oligochaeta
Restored 2005	5	2006-07-13	July	2006	1	Clam, juv.	1	127.324	Bivalve	Mollusk
Restored 2005	5	2006-07-13	July	2006	1	Diosacchus spinatus	4	509.295	Harpacticoid	Aquatic crustacean	all these harpacticoids associated with algae
Restored 2005	5	2006-07-13	July	2006	1	Amphiascus cinctus	2	254.647	Harpacticoid	Aquatic crustacean
Restored 2005	5	2006-07-13	July	2006	1	Zaus sp.	1	127.324	Harpacticoid	Aquatic crustacean
Restored 2005	5	2006-07-13	July	2006	1	Paralaophonte sp.	3	381.971	Harpacticoid	Aquatic crustacean
Restored 2005	5	2006-07-13	July	2006	1	Amonardia perturbata	5	636.618	Harpacticoid	Aquatic crustacean
Restored 2005	5	2006-07-13	July	2006	2	Clam, juv.	1	127.324	Bivalve	Mollusk
Restored 2005	5	2006-07-13	July	2006	2	Exosphaeroma inornata	1	127.324	Aquatic Isopod	Aquatic crustacean
Restored 2005	5	2006-07-13	July	2006	2	Parathalestris californica	1	127.324	Harpacticoid	Aquatic crustacean
Restored 2005	5	2006-07-13	July	2006	2	Hemipodia simplex	19	2419.15	Glyceridae	Polychaete
Restored 2005	5	2006-07-13	July	2006	2	Oligochaeta	1	127.324	Oligochaeta	Oligochaeta
Restored 2005	5	2006-07-13	July	2006	3	Mussel, juv.	1	127.324	Bivalve	Mollusk
Restored 2005	5	2006-07-13	July	2006	3	Hemipodia simplex	28	3565.06	Glyceridae	Polychaete
Restored 2005	5	2006-07-13	July	2006	3	Exosphaeroma inornata	5	636.618	Aquatic Isopod	Aquatic crustacean
Restored 2005	5	2006-07-13	July	2006	3	Nematoda	1	127.324	Nematoda	Nematoda
Restored 2005	5	2006-07-13	July	2006	4	Clam, juv.	1	127.324	Bivalve	Mollusk
Restored 2005	5	2006-07-13	July	2006	4	Nereidae	1	127.324	Nereidae	Polychaete	juv.
Restored 2005	5	2006-07-13	July	2006	4	Mussel, juv.	1	127.324	Bivalve	Mollusk
Restored 2005	5	2006-07-13	July	2006	4	Hemipodia simplex	27	3437.74	Glyceridae	Polychaete
Restored 2005	5	2006-07-13	July	2006	4	Exosphaeroma inornata	3	381.971	Aquatic Isopod	Aquatic crustacean
Restored 2005	5	2006-07-13	July	2006	4	Nematoda	4	509.295	Nematoda	Nematoda
Restored 2005	5	2006-07-13	July	2006	5	Turbellaria	1	127.324	Turbellaria	Nemertea/Turbellaria
Restored 2005	5	2006-07-13	July	2006	5	Capitellidae	2	254.647	Capitellidae	Polychaete	#4
Restored 2005	5	2006-07-13	July	2006	5	Nemertea	1	127.324	Nemertea	Nemertea/Turbellaria	#5
Restored 2005	5	2006-07-13	July	2006	5	Hemipodia simplex	20	2546.47	Glyceridae	Polychaete
Restored 2005	5	2006-07-13	July	2006	5	Nematoda	4	509.295	Nematoda	Nematoda
Restored 2005	5	2006-07-13	July	2006	5	Nereidae	1	127.324	Nereidae	Polychaete	juv.
Restored 2005	5	2006-07-13	July	2006	5	Spionidae	1	127.324	Spionidae	Polychaete	juv.
Restored 2005	5	2006-07-13	July	2006	6	Mussel, juv.	1	127.324	Bivalve	Mollusk
Restored 2005	5	2006-07-13	July	2006	6	Capitellidae	3	381.971	Capitellidae	Polychaete
Restored 2005	5	2006-07-13	July	2006	6	Nereidae	1	127.324	Nereidae	Polychaete	juv.
Restored 2005	5	2006-07-13	July	2006	6	Hemipodia simplex	47	5984.21	Glyceridae	Polychaete
Restored 2005	5	2006-07-13	July	2006	6	Glyceridae	1	127.324	Glyceridae	Polychaete	#6, not Hemipodia simplex, biramous parapodia?
Restored 2005	5	2006-07-13	July	2006	6	Exosphaeroma inornata	2	254.647	Aquatic Isopod	Aquatic crustacean
Restored 2005	5	2006-07-13	July	2006	6	Nematoda	5	636.618	Nematoda	Nematoda
Restored 2005	5	2006-07-13	July	2006	7	Mussel, juv.	4	509.295	Bivalve	Mollusk
Restored 2005	5	2006-07-13	July	2006	7	Capitellidae	2	254.647	Capitellidae	Polychaete
Restored 2005	5	2006-07-13	July	2006	7	Anthozoa	1	127.324	Anthozoa	Anthozoa	#7
Restored 2005	5	2006-07-13	July	2006	7	Nemertea	1	127.324	Nemertea	Nemertea/Turbellaria
Restored 2005	5	2006-07-13	July	2006	7	Nereidae	1	127.324	Nereidae	Polychaete	juv.
Restored 2005	5	2006-07-13	July	2006	7	Hemipodia simplex	31	3947.03	Glyceridae	Polychaete
Restored 2005	5	2006-07-13	July	2006	7	Nematoda	8	1018.59	Nematoda	Nematoda
Restored 2005	8	2006-07-13	July	2006	1	Hemipodia simplex	2	254.647	Glyceridae	Polychaete
Restored 2005	8	2006-07-13	July	2006	1	Euphausiacea zoea	3	381.971	Euphausiacea	Aquatic crustacean
Restored 2005	8	2006-07-13	July	2006	1	Nematoda	33	4201.68	Nematoda	Nematoda
Restored 2005	8	2006-07-13	July	2006	1	Oligochaeta	7	891.266	Oligochaeta	Oligochaeta
Restored 2005	8	2006-07-13	July	2006	2	Coleoptera larvae	4	509.295	Insect larvae	Insect, Arachnid, Collembola
Restored 2005	8	2006-07-13	July	2006	2	Oligochaeta	15	1909.85	Oligochaeta	Oligochaeta
Restored 2005	8	2006-07-13	July	2006	2	Nematoda	10	1273.24	Nematoda	Nematoda
Restored 2005	8	2006-07-13	July	2006	3	Chironomidae adult	1	127.324	Insect adult	Insect, Arachnid, Collembola
Restored 2005	8	2006-07-13	July	2006	3	Oligochaeta	21	2673.8	Oligochaeta	Oligochaeta
Restored 2005	8	2006-07-13	July	2006	3	Nematoda	8	1018.59	Nematoda	Nematoda
Restored 2005	8	2006-07-13	July	2006	4	Staphylinidae	1	127.324	Insect adult	Insect, Arachnid, Collembola
Restored 2005	8	2006-07-13	July	2006	4	Hypogastruridae	2	254.647	Collembola	Insect, Arachnid, Collembola
Restored 2005	8	2006-07-13	July	2006	4	Chironomidae adult	1	127.324	Insect adult	Insect, Arachnid, Collembola
Restored 2005	8	2006-07-13	July	2006	4	Traskorchestia traskiana	1	127.324	Terrestrial Amphipod	Terrestrial amphipod/isopod
Restored 2005	8	2006-07-13	July	2006	4	Ephydridae adult	1	127.324	Insect adult	Insect, Arachnid, Collembola
Restored 2005	8	2006-07-13	July	2006	4	Oligochaeta	29	3692.39	Oligochaeta	Oligochaeta
Restored 2005	8	2006-07-13	July	2006	4	Nematoda	13	1655.21	Nematoda	Nematoda
Restored 2005	8	2006-07-13	July	2006	5	Hypogastruridae	2	254.647	Collembola	Insect, Arachnid, Collembola
Restored 2005	8	2006-07-13	July	2006	5	Ephydridae larvae	1	127.324	Insect larvae	Insect, Arachnid, Collembola
Restored 2005	8	2006-07-13	July	2006	5	Oligochaeta	20	2546.47	Oligochaeta	Oligochaeta
Restored 2005	8	2006-07-13	July	2006	5	Nematoda	21	2673.8	Nematoda	Nematoda
Restored 2005	8	2006-07-13	July	2006	6	Coleoptera larvae	2	254.647	Insect larvae	Insect, Arachnid, Collembola
Restored 2005	8	2006-07-13	July	2006	6	Staphylinidae	1	127.324	Insect adult	Insect, Arachnid, Collembola
Restored 2005	8	2006-07-13	July	2006	6	Chironomidae adult	1	127.324	Insect adult	Insect, Arachnid, Collembola
Restored 2005	8	2006-07-13	July	2006	6	Oligochaeta	9	1145.91	Oligochaeta	Oligochaeta
Restored 2005	8	2006-07-13	July	2006	6	Nematoda	26	3310.42	Nematoda	Nematoda
Restored 2005	8	2006-07-13	July	2006	7	Hypogastruridae	1	127.324	Collembola	Insect, Arachnid, Collembola
Restored 2005	8	2006-07-13	July	2006	7	Euphausiacea zoea	2	254.647	Euphausiacea	Aquatic crustacean
Restored 2005	8	2006-07-13	July	2006	7	Diosacchus spinatus	1	127.324	Harpacticoid	Aquatic crustacean
Restored 2005	8	2006-07-13	July	2006	7	Talitridae, juv.	1	127.324	Terrestrial Amphipod	Terrestrial amphipod/isopod
Restored 2005	8	2006-07-13	July	2006	7	Epicaridea	1	127.324	Aquatic Isopod	Aquatic crustacean
Restored 2005	8	2006-07-13	July	2006	7	Oligochaeta	27	3437.74	Oligochaeta	Oligochaeta
Restored 2005	8	2006-07-13	July	2006	7	Nematoda	56	7130.12	Nematoda	Nematoda
Restored 2005	12	2006-07-13	July	2006	1	Oligochaeta	5	636.618	Oligochaeta	Oligochaeta
Restored 2005	12	2006-07-13	July	2006	1	Nematoda	4	509.295	Nematoda	Nematoda
Restored 2005	12	2006-07-13	July	2006	1	Traskorchestia georgiana	18	2291.83	Terrestrial Amphipod	Terrestrial amphipod/isopod
Restored 2005	12	2006-07-13	July	2006	1	Traskorchestia traskiana	69	8785.33	Terrestrial Amphipod	Terrestrial amphipod/isopod
Restored 2005	12	2006-07-13	July	2006	1	Talitridae, juv.	30	3819.71	Terrestrial Amphipod	Terrestrial amphipod/isopod
Restored 2005	12	2006-07-13	July	2006	2	Mussel, juv.	1	127.324	Bivalve	Mollusk
Restored 2005	12	2006-07-13	July	2006	2	Traskorchestia georgiana	9	1145.91	Terrestrial Amphipod	Terrestrial amphipod/isopod
Restored 2005	12	2006-07-13	July	2006	2	Traskorchestia traskiana	18	2291.83	Terrestrial Amphipod	Terrestrial amphipod/isopod
Restored 2005	12	2006-07-13	July	2006	2	Talitridae, juv.	16	2037.18	Terrestrial Amphipod	Terrestrial amphipod/isopod
Restored 2005	12	2006-07-13	July	2006	2	Nematoda	2	254.647	Nematoda	Nematoda
Restored 2005	12	2006-07-13	July	2006	2	Oligochaeta	10	1273.24	Oligochaeta	Oligochaeta
Restored 2005	12	2006-07-13	July	2006	3	Acari	3	381.971	Arachnid	Insect, Arachnid, Collembola
Restored 2005	12	2006-07-13	July	2006	3	Staphylinidae	1	127.324	Insect adult	Insect, Arachnid, Collembola
Restored 2005	12	2006-07-13	July	2006	3	Traskorchestia georgiana	2	254.647	Terrestrial Amphipod	Terrestrial amphipod/isopod
Restored 2005	12	2006-07-13	July	2006	3	Traskorchestia traskiana	5	636.618	Terrestrial Amphipod	Terrestrial amphipod/isopod
Restored 2005	12	2006-07-13	July	2006	3	Talitridae, juv.	11	1400.56	Terrestrial Amphipod	Terrestrial amphipod/isopod
Restored 2005	12	2006-07-13	July	2006	3	Nematoda	11	1400.56	Nematoda	Nematoda
Restored 2005	12	2006-07-13	July	2006	3	Oligochaeta	14	1782.53	Oligochaeta	Oligochaeta
Restored 2005	12	2006-07-13	July	2006	4	Coleoptera larvae	1	127.324	Insect larvae	Insect, Arachnid, Collembola
Restored 2005	12	2006-07-13	July	2006	4	Ephydridae larvae	1	127.324	Insect larvae	Insect, Arachnid, Collembola
Restored 2005	12	2006-07-13	July	2006	4	Traskorchestia georgiana	5	636.618	Terrestrial Amphipod	Terrestrial amphipod/isopod
Restored 2005	12	2006-07-13	July	2006	4	Traskorchestia traskiana	5	636.618	Terrestrial Amphipod	Terrestrial amphipod/isopod
Restored 2005	12	2006-07-13	July	2006	4	Talitridae, juv.	18	2291.83	Terrestrial Amphipod	Terrestrial amphipod/isopod
Restored 2005	12	2006-07-13	July	2006	4	Nematoda	12	1527.88	Nematoda	Nematoda
Restored 2005	12	2006-07-13	July	2006	4	Oligochaeta	24	3055.77	Oligochaeta	Oligochaeta
Restored 2005	12	2006-07-13	July	2006	5	Staphylinidae	1	127.324	Insect adult	Insect, Arachnid, Collembola
Restored 2005	12	2006-07-13	July	2006	5	Acari	2	254.647	Arachnid	Insect, Arachnid, Collembola
Restored 2005	12	2006-07-13	July	2006	5	Oniscoidea, juv.	13	1655.21	Terrestrial Isopod	Terrestrial amphipod/isopod	juvenile terrestrial isopod
Restored 2005	12	2006-07-13	July	2006	5	Coleoptera larvae	1	127.324	Insect larvae	Insect, Arachnid, Collembola
Restored 2005	12	2006-07-13	July	2006	5	Nemertea	1	127.324	Nemertea	Nemertea/Turbellaria
Restored 2005	12	2006-07-13	July	2006	5	Traskorchestia georgiana	3	381.971	Terrestrial Amphipod	Terrestrial amphipod/isopod
Restored 2005	12	2006-07-13	July	2006	5	Traskorchestia traskiana	10	1273.24	Terrestrial Amphipod	Terrestrial amphipod/isopod
Restored 2005	12	2006-07-13	July	2006	5	Talitridae, juv.	8	1018.59	Terrestrial Amphipod	Terrestrial amphipod/isopod
Restored 2005	12	2006-07-13	July	2006	5	Nematoda	4	509.295	Nematoda	Nematoda
Restored 2005	12	2006-07-13	July	2006	5	Oligochaeta	12	1527.88	Oligochaeta	Oligochaeta
Restored 2005	12	2006-07-13	July	2006	6	Megalorchestia pugettensis	1	127.324	Terrestrial Amphipod	Terrestrial amphipod/isopod
Restored 2005	12	2006-07-13	July	2006	6	Traskorchestia georgiana	2	254.647	Terrestrial Amphipod	Terrestrial amphipod/isopod
Restored 2005	12	2006-07-13	July	2006	6	Traskorchestia traskiana	2	254.647	Terrestrial Amphipod	Terrestrial amphipod/isopod
Restored 2005	12	2006-07-13	July	2006	6	Talitridae, juv.	21	2673.8	Terrestrial Amphipod	Terrestrial amphipod/isopod
Restored 2005	12	2006-07-13	July	2006	6	Nematoda	1	127.324	Nematoda	Nematoda
Restored 2005	12	2006-07-13	July	2006	6	Oligochaeta	13	1655.21	Oligochaeta	Oligochaeta
Restored 2005	12	2006-07-13	July	2006	7	Staphylinidae	2	254.647	Insect adult	Insect, Arachnid, Collembola
Restored 2005	12	2006-07-13	July	2006	7	Coleoptera larvae	1	127.324	Insect larvae	Insect, Arachnid, Collembola
Restored 2005	12	2006-07-13	July	2006	7	Acari	1	127.324	Arachnid	Insect, Arachnid, Collembola
Restored 2005	12	2006-07-13	July	2006	7	Traskorchestia traskiana	1	127.324	Terrestrial Amphipod	Terrestrial amphipod/isopod
Restored 2005	12	2006-07-13	July	2006	7	Talitridae, juv.	7	891.266	Terrestrial Amphipod	Terrestrial amphipod/isopod
Restored 2005	12	2006-07-13	July	2006	7	Nematoda	2	254.647	Nematoda	Nematoda
Restored 2005	12	2006-07-13	July	2006	7	Oligochaeta	11	1400.56	Oligochaeta	Oligochaeta
Reference	5	2006-09-07	September	2006	1	Gnorimosphaeroma oregonense	2	254.647	Aquatic Isopod	Aquatic crustacean
Reference	5	2006-09-07	September	2006	1	Allorchestes sp.	42	5347.59	Aquatic Amphipod	Aquatic crustacean
Reference	5	2006-09-07	September	2006	1	Amphipod, juv.	15	1909.85	Aquatic Amphipod	Aquatic crustacean
Reference	5	2006-09-07	September	2006	1	Paramoera sp.	4	509.295	Aquatic Amphipod	Aquatic crustacean
Reference	5	2006-09-07	September	2006	1	Exosphaeroma inornata	19	2419.15	Aquatic Isopod	Aquatic crustacean
Reference	5	2006-09-07	September	2006	1	Eogammarus confervicolus	24	3055.77	Aquatic Amphipod	Aquatic crustacean
Reference	5	2006-09-07	September	2006	1	Nematoda	1	127.324	Nematoda	Nematoda
Reference	5	2006-09-07	September	2006	1	Oligochaeta	124	15788.1	Oligochaeta	Oligochaeta
Reference	5	2006-09-07	September	2006	2	Nereidae	1	127.324	Nereidae	Polychaete
Reference	5	2006-09-07	September	2006	2	Mussel, juv.	1	127.324	Bivalve	Mollusk
Reference	5	2006-09-07	September	2006	2	Gnorimosphaeroma oregonense	2	254.647	Aquatic Isopod	Aquatic crustacean
Reference	5	2006-09-07	September	2006	2	Nemertea	2	254.647	Nemertea	Nemertea/Turbellaria
Reference	5	2006-09-07	September	2006	2	Capitellidae	1	127.324	Capitellidae	Polychaete
Reference	5	2006-09-07	September	2006	2	Allorchestes sp.	49	6238.86	Aquatic Amphipod	Aquatic crustacean	these are Allorchestes angusta
Reference	5	2006-09-07	September	2006	2	Amphipod, juv.	28	3565.06	Aquatic Amphipod	Aquatic crustacean
Reference	5	2006-09-07	September	2006	2	Paramoera sp.	6	763.942	Aquatic Amphipod	Aquatic crustacean	these are Paramoera bousfieldi
Reference	5	2006-09-07	September	2006	2	Exosphaeroma inornata	15	1909.85	Aquatic Isopod	Aquatic crustacean
Reference	5	2006-09-07	September	2006	2	Eogammarus confervicolus	39	4965.62	Aquatic Amphipod	Aquatic crustacean
Reference	5	2006-09-07	September	2006	2	Nematoda	1	127.324	Nematoda	Nematoda
Reference	5	2006-09-07	September	2006	2	Oligochaeta	200	25464.7	Oligochaeta	Oligochaeta
Reference	5	2006-09-07	September	2006	3	Mussel, juv.	3	381.971	Bivalve	Mollusk
Reference	5	2006-09-07	September	2006	3	Nereidae	1	127.324	Nereidae	Polychaete	juv.
Reference	5	2006-09-07	September	2006	3	Gnorimosphaeroma oregonense	14	1782.53	Aquatic Isopod	Aquatic crustacean
Reference	5	2006-09-07	September	2006	3	Exosphaeroma inornata	4	509.295	Aquatic Isopod	Aquatic crustacean
Reference	5	2006-09-07	September	2006	3	Capitellidae	1	127.324	Capitellidae	Polychaete
Reference	5	2006-09-07	September	2006	3	Hemigrapsus oregonensis	1	127.324	Crab	Aquatic crustacean
Reference	5	2006-09-07	September	2006	3	Oligochaeta	94	11968.4	Oligochaeta	Oligochaeta
Reference	5	2006-09-07	September	2006	3	Nematoda	1	127.324	Nematoda	Nematoda
Reference	5	2006-09-07	September	2006	3	Eogammarus confervicolus	49	6238.86	Aquatic Amphipod	Aquatic crustacean
Reference	5	2006-09-07	September	2006	3	Allorchestes sp.	41	5220.27	Aquatic Amphipod	Aquatic crustacean
Reference	5	2006-09-07	September	2006	3	Amphipod, juv.	5	636.618	Aquatic Amphipod	Aquatic crustacean
Reference	5	2006-09-07	September	2006	4	Mussel, juv.	1	127.324	Bivalve	Mollusk
Reference	5	2006-09-07	September	2006	4	Hemigrapsus oregonensis	3	381.971	Crab	Aquatic crustacean
Reference	5	2006-09-07	September	2006	4	Gnorimosphaeroma oregonense	17	2164.5	Aquatic Isopod	Aquatic crustacean
Reference	5	2006-09-07	September	2006	4	Exosphaeroma inornata	1	127.324	Aquatic Isopod	Aquatic crustacean
Reference	5	2006-09-07	September	2006	4	Oligochaeta	107	13623.6	Oligochaeta	Oligochaeta
Reference	5	2006-09-07	September	2006	4	Nematoda	1	127.324	Nematoda	Nematoda
Reference	5	2006-09-07	September	2006	4	Eogammarus confervicolus	28	3565.06	Aquatic Amphipod	Aquatic crustacean
Reference	5	2006-09-07	September	2006	4	Allorchestes sp.	77	9803.92	Aquatic Amphipod	Aquatic crustacean
Reference	5	2006-09-07	September	2006	4	Paramoera sp.	27	3437.74	Aquatic Amphipod	Aquatic crustacean
Reference	5	2006-09-07	September	2006	4	Amphipod, juv.	6	763.942	Aquatic Amphipod	Aquatic crustacean
Reference	5	2006-09-07	September	2006	5	Mussel, juv.	2	254.647	Bivalve	Mollusk
Reference	5	2006-09-07	September	2006	5	Ostracoda	1	127.324	Ostracoda	Aquatic crustacean
Reference	5	2006-09-07	September	2006	5	Nematoda	1	127.324	Nematoda	Nematoda
Reference	5	2006-09-07	September	2006	5	Exosphaeroma inornata	21	2673.8	Aquatic Isopod	Aquatic crustacean
Reference	5	2006-09-07	September	2006	5	Gnorimosphaeroma oregonense	11	1400.56	Aquatic Isopod	Aquatic crustacean
Reference	5	2006-09-07	September	2006	5	Capitellidae	8	1018.59	Capitellidae	Polychaete
Reference	5	2006-09-07	September	2006	5	Hemigrapsus oregonensis	1	127.324	Crab	Aquatic crustacean
Reference	5	2006-09-07	September	2006	5	Oligochaeta	194	24700.8	Oligochaeta	Oligochaeta
Reference	5	2006-09-07	September	2006	5	Allorchestes sp.	151	19225.9	Aquatic Amphipod	Aquatic crustacean
Reference	5	2006-09-07	September	2006	5	Amphipod, juv.	14	1782.53	Aquatic Amphipod	Aquatic crustacean
Reference	5	2006-09-07	September	2006	5	Paramoera sp.	10	1273.24	Aquatic Amphipod	Aquatic crustacean
Reference	5	2006-09-07	September	2006	5	Eogammarus confervicolus	163	20753.8	Aquatic Amphipod	Aquatic crustacean
Reference	5	2006-09-07	September	2006	6	Ostracoda	1	127.324	Ostracoda	Aquatic crustacean
Reference	5	2006-09-07	September	2006	6	Oligochaeta	83	10567.9	Oligochaeta	Oligochaeta
Reference	5	2006-09-07	September	2006	6	Nematoda	2	254.647	Nematoda	Nematoda
Reference	5	2006-09-07	September	2006	6	Capitellidae	2	254.647	Capitellidae	Polychaete
Reference	5	2006-09-07	September	2006	6	Exosphaeroma inornata	5	636.618	Aquatic Isopod	Aquatic crustacean
Reference	5	2006-09-07	September	2006	6	Allorchestes sp.	105	13369	Aquatic Amphipod	Aquatic crustacean
Reference	5	2006-09-07	September	2006	6	Mussel, juv.	4	509.295	Bivalve	Mollusk
Reference	5	2006-09-07	September	2006	6	Amphipod, juv.	18	2291.83	Aquatic Amphipod	Aquatic crustacean
Reference	5	2006-09-07	September	2006	6	Paramoera sp.	2	254.647	Aquatic Amphipod	Aquatic crustacean
Reference	5	2006-09-07	September	2006	6	Gnorimosphaeroma oregonense	10	1273.24	Aquatic Isopod	Aquatic crustacean
Reference	5	2006-09-07	September	2006	6	Eogammarus confervicolus	139	17698	Aquatic Amphipod	Aquatic crustacean
Reference	5	2006-09-07	September	2006	6	Hemigrapsus oregonensis	1	127.324	Crab	Aquatic crustacean
Reference	5	2006-09-07	September	2006	7	Nereidae	1	127.324	Nereidae	Polychaete	juv.
Reference	5	2006-09-07	September	2006	7	Oligochaeta	72	9167.3	Oligochaeta	Oligochaeta
Reference	5	2006-09-07	September	2006	7	Nematoda	2	254.647	Nematoda	Nematoda
Reference	5	2006-09-07	September	2006	7	Photis sp.	1	127.324	Aquatic Amphipod	Aquatic crustacean	#10
Reference	5	2006-09-07	September	2006	7	Exosphaeroma inornata	3	381.971	Aquatic Isopod	Aquatic crustacean
Reference	5	2006-09-07	September	2006	7	Allorchestes sp.	100	12732.4	Aquatic Amphipod	Aquatic crustacean
Reference	5	2006-09-07	September	2006	7	Amphipod, juv.	11	1400.56	Aquatic Amphipod	Aquatic crustacean
Reference	5	2006-09-07	September	2006	7	Paramoera sp.	3	381.971	Aquatic Amphipod	Aquatic crustacean
Reference	5	2006-09-07	September	2006	7	Gnorimosphaeroma oregonense	11	1400.56	Aquatic Isopod	Aquatic crustacean
Reference	5	2006-09-07	September	2006	7	Eogammarus confervicolus	260	33104.2	Aquatic Amphipod	Aquatic crustacean
Reference	8	2006-09-07	September	2006	1	Aphididae	1	127.324	Insect adult	Insect, Arachnid, Collembola
Reference	8	2006-09-07	September	2006	1	Oligochaeta	18	2291.83	Oligochaeta	Oligochaeta
Reference	8	2006-09-07	September	2006	1	Nematoda	4	509.295	Nematoda	Nematoda
Reference	8	2006-09-07	September	2006	1	Turbellaria	6	763.942	Turbellaria	Nemertea/Turbellaria
Reference	8	2006-09-07	September	2006	1	Nemertea	1	127.324	Nemertea	Nemertea/Turbellaria
Reference	8	2006-09-07	September	2006	2	Sminthuridae	1	127.324	Collembola	Insect, Arachnid, Collembola
Reference	8	2006-09-07	September	2006	2	Megalorchestia pugettensis	4	509.295	Terrestrial Amphipod	Terrestrial amphipod/isopod
Reference	8	2006-09-07	September	2006	2	Nereidae	1	127.324	Nereidae	Polychaete	juv.
Reference	8	2006-09-07	September	2006	2	Paramoera sp.	1	127.324	Aquatic Amphipod	Aquatic crustacean
Reference	8	2006-09-07	September	2006	2	Oligochaeta	11	1400.56	Oligochaeta	Oligochaeta
Reference	8	2006-09-07	September	2006	2	Nematoda	2	254.647	Nematoda	Nematoda
Reference	8	2006-09-07	September	2006	2	Turbellaria	5	636.618	Turbellaria	Nemertea/Turbellaria
Reference	8	2006-09-07	September	2006	3	Talitridae, juv.	1	127.324	Terrestrial Amphipod	Terrestrial amphipod/isopod
Reference	8	2006-09-07	September	2006	3	Oligochaeta	22	2801.12	Oligochaeta	Oligochaeta
Reference	8	2006-09-07	September	2006	3	Turbellaria	21	2673.8	Turbellaria	Nemertea/Turbellaria
Reference	8	2006-09-07	September	2006	4	Eogammarus confervicolus	2	254.647	Aquatic Amphipod	Aquatic crustacean
Reference	8	2006-09-07	September	2006	4	Paramoera sp.	1	127.324	Aquatic Amphipod	Aquatic crustacean
Reference	8	2006-09-07	September	2006	4	Megalorchestia pugettensis	1	127.324	Terrestrial Amphipod	Terrestrial amphipod/isopod
Reference	8	2006-09-07	September	2006	4	Nemertea	1	127.324	Nemertea	Nemertea/Turbellaria
Reference	8	2006-09-07	September	2006	4	Oligochaeta	3	381.971	Oligochaeta	Oligochaeta
Reference	8	2006-09-07	September	2006	5	Megalorchestia pugettensis	1	127.324	Terrestrial Amphipod	Terrestrial amphipod/isopod
Reference	8	2006-09-07	September	2006	5	Oligochaeta	5	636.618	Oligochaeta	Oligochaeta
Reference	8	2006-09-07	September	2006	5	Turbellaria	9	1145.91	Turbellaria	Nemertea/Turbellaria
Reference	8	2006-09-07	September	2006	5	Paramoera sp.	23	2928.44	Aquatic Amphipod	Aquatic crustacean	these are Paramoera mohri
Reference	8	2006-09-07	September	2006	5	Mytilus edulis	1	127.324	Bivalve	Mollusk
Reference	8	2006-09-07	September	2006	6	Eogammarus confervicolus	1	127.324	Aquatic Amphipod	Aquatic crustacean
Reference	8	2006-09-07	September	2006	6	Megalorchestia pugettensis	1	127.324	Terrestrial Amphipod	Terrestrial amphipod/isopod
Reference	8	2006-09-07	September	2006	6	Paramoera sp.	4	509.295	Aquatic Amphipod	Aquatic crustacean
Reference	8	2006-09-07	September	2006	6	Oligochaeta	1	127.324	Oligochaeta	Oligochaeta
Reference	8	2006-09-07	September	2006	6	Mussel, juv.	1	127.324	Bivalve	Mollusk
Reference	8	2006-09-07	September	2006	6	Turbellaria	2	254.647	Turbellaria	Nemertea/Turbellaria
Reference	8	2006-09-07	September	2006	7	Megalorchestia pugettensis	3	381.971	Terrestrial Amphipod	Terrestrial amphipod/isopod
Reference	8	2006-09-07	September	2006	7	Traskorchestia traskiana	1	127.324	Terrestrial Amphipod	Terrestrial amphipod/isopod
Reference	8	2006-09-07	September	2006	7	Paramoera sp.	3	381.971	Aquatic Amphipod	Aquatic crustacean
Reference	8	2006-09-07	September	2006	7	Talitridae, juv.	1	127.324	Terrestrial Amphipod	Terrestrial amphipod/isopod
Reference	8	2006-09-07	September	2006	7	Oligochaeta	8	1018.59	Oligochaeta	Oligochaeta
Reference	8	2006-09-07	September	2006	7	Turbellaria	7	891.266	Turbellaria	Nemertea/Turbellaria
Reference	12	2006-09-07	September	2006	1	Sphaeromatidae, juv.	1	127.324	Aquatic Isopod	Aquatic crustacean
Reference	12	2006-09-07	September	2006	1	Turbellaria	2	254.647	Turbellaria	Nemertea/Turbellaria
Reference	12	2006-09-07	September	2006	1	Megalorchestia pugettensis	7	891.266	Terrestrial Amphipod	Terrestrial amphipod/isopod
Reference	12	2006-09-07	September	2006	1	Nemertea	3	381.971	Nemertea	Nemertea/Turbellaria
Reference	12	2006-09-07	September	2006	1	Talitridae, juv.	2	254.647	Terrestrial Amphipod	Terrestrial amphipod/isopod
Reference	12	2006-09-07	September	2006	1	Nematoda	4	509.295	Nematoda	Nematoda
Reference	12	2006-09-07	September	2006	1	Oligochaeta	110	14005.6	Oligochaeta	Oligochaeta
Reference	12	2006-09-07	September	2006	2	Turbellaria	3	381.971	Turbellaria	Nemertea/Turbellaria
Reference	12	2006-09-07	September	2006	2	Megalorchestia pugettensis	9	1145.91	Terrestrial Amphipod	Terrestrial amphipod/isopod
Reference	12	2006-09-07	September	2006	2	Nemertea	7	891.266	Nemertea	Nemertea/Turbellaria
Reference	12	2006-09-07	September	2006	2	Acari	1	127.324	Arachnid	Insect, Arachnid, Collembola
Reference	12	2006-09-07	September	2006	2	Traskorchestia traskiana	1	127.324	Terrestrial Amphipod	Terrestrial amphipod/isopod
Reference	12	2006-09-07	September	2006	2	Talitridae, juv.	3	381.971	Terrestrial Amphipod	Terrestrial amphipod/isopod
Reference	12	2006-09-07	September	2006	2	Nematoda	2	254.647	Nematoda	Nematoda
Reference	12	2006-09-07	September	2006	2	Oligochaeta	75	9549.27	Oligochaeta	Oligochaeta
Reference	12	2006-09-07	September	2006	3	Turbellaria	9	1145.91	Turbellaria	Nemertea/Turbellaria
Reference	12	2006-09-07	September	2006	3	Megalorchestia pugettensis	4	509.295	Terrestrial Amphipod	Terrestrial amphipod/isopod
Reference	12	2006-09-07	September	2006	3	Nemertea	17	2164.5	Nemertea	Nemertea/Turbellaria
Reference	12	2006-09-07	September	2006	3	Talitridae, juv.	1	127.324	Terrestrial Amphipod	Terrestrial amphipod/isopod
Reference	12	2006-09-07	September	2006	3	Nematoda	3	381.971	Nematoda	Nematoda
Reference	12	2006-09-07	September	2006	3	Oligochaeta	95	12095.7	Oligochaeta	Oligochaeta
Reference	12	2006-09-07	September	2006	4	Megalorchestia pugettensis	2	254.647	Terrestrial Amphipod	Terrestrial amphipod/isopod
Reference	12	2006-09-07	September	2006	4	Nemertea	11	1400.56	Nemertea	Nemertea/Turbellaria
Reference	12	2006-09-07	September	2006	4	Traskorchestia traskiana	2	254.647	Terrestrial Amphipod	Terrestrial amphipod/isopod
Reference	12	2006-09-07	September	2006	4	Nematoda	3	381.971	Nematoda	Nematoda
Reference	12	2006-09-07	September	2006	4	Oligochaeta	74	9421.95	Oligochaeta	Oligochaeta
Reference	12	2006-09-07	September	2006	5	Turbellaria	13	1655.21	Turbellaria	Nemertea/Turbellaria
Reference	12	2006-09-07	September	2006	5	Megalorchestia pugettensis	4	509.295	Terrestrial Amphipod	Terrestrial amphipod/isopod
Reference	12	2006-09-07	September	2006	5	Nemertea	2	254.647	Nemertea	Nemertea/Turbellaria
Reference	12	2006-09-07	September	2006	5	Talitridae, juv.	1	127.324	Terrestrial Amphipod	Terrestrial amphipod/isopod
Reference	12	2006-09-07	September	2006	5	Nematoda	17	2164.5	Nematoda	Nematoda
Reference	12	2006-09-07	September	2006	5	Oligochaeta	115	14642.2	Oligochaeta	Oligochaeta
Reference	12	2006-09-07	September	2006	6	Turbellaria	9	1145.91	Turbellaria	Nemertea/Turbellaria
Reference	12	2006-09-07	September	2006	6	Megalorchestia pugettensis	1	127.324	Terrestrial Amphipod	Terrestrial amphipod/isopod
Reference	12	2006-09-07	September	2006	6	Nemertea	5	636.618	Nemertea	Nemertea/Turbellaria
Reference	12	2006-09-07	September	2006	6	Traskorchestia traskiana	1	127.324	Terrestrial Amphipod	Terrestrial amphipod/isopod
Reference	12	2006-09-07	September	2006	6	Talitridae, juv.	1	127.324	Terrestrial Amphipod	Terrestrial amphipod/isopod
Reference	12	2006-09-07	September	2006	6	Nematoda	26	3310.42	Nematoda	Nematoda
Reference	12	2006-09-07	September	2006	6	Oligochaeta	95	12095.7	Oligochaeta	Oligochaeta
Reference	12	2006-09-07	September	2006	7	Turbellaria	8	1018.59	Turbellaria	Nemertea/Turbellaria
Reference	12	2006-09-07	September	2006	7	Megalorchestia pugettensis	1	127.324	Terrestrial Amphipod	Terrestrial amphipod/isopod
Reference	12	2006-09-07	September	2006	7	Nemertea	2	254.647	Nemertea	Nemertea/Turbellaria
Reference	12	2006-09-07	September	2006	7	Traskorchestia traskiana	6	763.942	Terrestrial Amphipod	Terrestrial amphipod/isopod
Reference	12	2006-09-07	September	2006	7	Talitridae, juv.	3	381.971	Terrestrial Amphipod	Terrestrial amphipod/isopod
Reference	12	2006-09-07	September	2006	7	Nematoda	14	1782.53	Nematoda	Nematoda
Reference	12	2006-09-07	September	2006	7	Oligochaeta	163	20753.8	Oligochaeta	Oligochaeta
Restored 2005	5	2006-09-07	September	2006	1	Oligochaeta	76	9676.6	Oligochaeta	Oligochaeta
Restored 2005	5	2006-09-07	September	2006	1	Nematoda	32	4074.36	Nematoda	Nematoda
Restored 2005	5	2006-09-07	September	2006	1	Ostracoda	1	127.324	Ostracoda	Aquatic crustacean
Restored 2005	5	2006-09-07	September	2006	1	Nemertea	1	127.324	Nemertea	Nemertea/Turbellaria
Restored 2005	5	2006-09-07	September	2006	1	Exosphaeroma inornata	22	2801.12	Aquatic Isopod	Aquatic crustacean
Restored 2005	5	2006-09-07	September	2006	1	Allorchestes sp.	2	254.647	Aquatic Amphipod	Aquatic crustacean
Restored 2005	5	2006-09-07	September	2006	1	Hemipodia simplex	7	891.266	Glyceridae	Polychaete
Restored 2005	5	2006-09-07	September	2006	1	Amphipod, juv.	2	254.647	Aquatic Amphipod	Aquatic crustacean
Restored 2005	5	2006-09-07	September	2006	1	Eogammarus confervicolus	3	381.971	Aquatic Amphipod	Aquatic crustacean
Restored 2005	5	2006-09-07	September	2006	2	Nemertea	1	127.324	Nemertea	Nemertea/Turbellaria
Restored 2005	5	2006-09-07	September	2006	2	Nereidae	1	127.324	Nereidae	Polychaete	juv.
Restored 2005	5	2006-09-07	September	2006	2	Oligochaeta	124	15788.1	Oligochaeta	Oligochaeta
Restored 2005	5	2006-09-07	September	2006	2	Nematoda	19	2419.15	Nematoda	Nematoda
Restored 2005	5	2006-09-07	September	2006	2	Exosphaeroma inornata	19	2419.15	Aquatic Isopod	Aquatic crustacean
Restored 2005	5	2006-09-07	September	2006	2	Allorchestes sp.	3	381.971	Aquatic Amphipod	Aquatic crustacean
Restored 2005	5	2006-09-07	September	2006	2	Hemipodia simplex	3	381.971	Glyceridae	Polychaete
Restored 2005	5	2006-09-07	September	2006	2	Gnorimosphaeroma oregonense	1	127.324	Aquatic Isopod	Aquatic crustacean
Restored 2005	5	2006-09-07	September	2006	2	Eogammarus confervicolus	5	636.618	Aquatic Amphipod	Aquatic crustacean
Restored 2005	5	2006-09-07	September	2006	2	Spionidae	1	127.324	Spionidae	Polychaete	juv.
Restored 2005	5	2006-09-07	September	2006	3	Spionidae	1	127.324	Spionidae	Polychaete	juv.
Restored 2005	5	2006-09-07	September	2006	3	Nemertea	5	636.618	Nemertea	Nemertea/Turbellaria
Restored 2005	5	2006-09-07	September	2006	3	Exosphaeroma inornata	15	1909.85	Aquatic Isopod	Aquatic crustacean
Restored 2005	5	2006-09-07	September	2006	3	Oligochaeta	26	3310.42	Oligochaeta	Oligochaeta
Restored 2005	5	2006-09-07	September	2006	3	Nematoda	6	763.942	Nematoda	Nematoda
Restored 2005	5	2006-09-07	September	2006	3	Allorchestes sp.	2	254.647	Aquatic Amphipod	Aquatic crustacean
Restored 2005	5	2006-09-07	September	2006	3	Eogammarus confervicolus	3	381.971	Aquatic Amphipod	Aquatic crustacean
Restored 2005	5	2006-09-07	September	2006	4	Nemertea	5	636.618	Nemertea	Nemertea/Turbellaria
Restored 2005	5	2006-09-07	September	2006	4	Cumella vulgaris	1	127.324	Cumacea	Aquatic crustacean
Restored 2005	5	2006-09-07	September	2006	4	Exosphaeroma inornata	13	1655.21	Aquatic Isopod	Aquatic crustacean
Restored 2005	5	2006-09-07	September	2006	4	Eogammarus confervicolus	1	127.324	Aquatic Amphipod	Aquatic crustacean
Restored 2005	5	2006-09-07	September	2006	4	Nematoda	1	127.324	Nematoda	Nematoda
Restored 2005	5	2006-09-07	September	2006	4	Oligochaeta	12	1527.88	Oligochaeta	Oligochaeta
Restored 2005	5	2006-09-07	September	2006	5	Clam, juv.	1	127.324	Bivalve	Mollusk
Restored 2005	5	2006-09-07	September	2006	5	Mussel, juv.	1	127.324	Bivalve	Mollusk
Restored 2005	5	2006-09-07	September	2006	5	Nemertea	2	254.647	Nemertea	Nemertea/Turbellaria
Restored 2005	5	2006-09-07	September	2006	5	Exosphaeroma inornata	4	509.295	Aquatic Isopod	Aquatic crustacean
Restored 2005	5	2006-09-07	September	2006	5	Nematoda	11	1400.56	Nematoda	Nematoda
Restored 2005	5	2006-09-07	September	2006	5	Oligochaeta	26	3310.42	Oligochaeta	Oligochaeta
Restored 2005	5	2006-09-07	September	2006	6	Amphipod, juv.	2	254.647	Aquatic Amphipod	Aquatic crustacean
Restored 2005	5	2006-09-07	September	2006	6	Nemertea	5	636.618	Nemertea	Nemertea/Turbellaria
Restored 2005	5	2006-09-07	September	2006	6	Exosphaeroma inornata	2	254.647	Aquatic Isopod	Aquatic crustacean
Restored 2005	5	2006-09-07	September	2006	6	Eogammarus confervicolus	1	127.324	Aquatic Amphipod	Aquatic crustacean
Restored 2005	5	2006-09-07	September	2006	6	Nematoda	1	127.324	Nematoda	Nematoda
Restored 2005	5	2006-09-07	September	2006	6	Oligochaeta	52	6620.83	Oligochaeta	Oligochaeta
Restored 2005	5	2006-09-07	September	2006	7	Clam, juv.	1	127.324	Bivalve	Mollusk
Restored 2005	5	2006-09-07	September	2006	7	Nemertea	3	381.971	Nemertea	Nemertea/Turbellaria
Restored 2005	5	2006-09-07	September	2006	7	Exosphaeroma inornata	10	1273.24	Aquatic Isopod	Aquatic crustacean
Restored 2005	5	2006-09-07	September	2006	7	Nematoda	1	127.324	Nematoda	Nematoda
Restored 2005	5	2006-09-07	September	2006	7	Oligochaeta	54	6875.48	Oligochaeta	Oligochaeta
Restored 2005	8	2006-09-07	September	2006	1	Talitridae, juv.	3	381.971	Terrestrial Amphipod	Terrestrial amphipod/isopod
Restored 2005	8	2006-09-07	September	2006	1	Mussel, juv.	2	254.647	Bivalve	Mollusk
Restored 2005	8	2006-09-07	September	2006	1	Oligochaeta	65	8276.04	Oligochaeta	Oligochaeta
Restored 2005	8	2006-09-07	September	2006	1	Nematoda	16	2037.18	Nematoda	Nematoda
Restored 2005	8	2006-09-07	September	2006	1	Turbellaria	1	127.324	Turbellaria	Nemertea/Turbellaria
Restored 2005	8	2006-09-07	September	2006	1	Protodriloides chaetifer	2	254.647	Archiannelida	Polychaete
Restored 2005	8	2006-09-07	September	2006	1	Nemertea	6	763.942	Nemertea	Nemertea/Turbellaria
Restored 2005	8	2006-09-07	September	2006	2	Acari	1	127.324	Arachnid	Insect, Arachnid, Collembola
Restored 2005	8	2006-09-07	September	2006	2	Hypogastruridae	2	254.647	Collembola	Insect, Arachnid, Collembola
Restored 2005	8	2006-09-07	September	2006	2	Mussel, juv.	1	127.324	Bivalve	Mollusk
Restored 2005	8	2006-09-07	September	2006	2	Foraminifera	1	127.324	Foraminifera	Foraminifera
Restored 2005	8	2006-09-07	September	2006	2	Oligochaeta	132	16806.7	Oligochaeta	Oligochaeta
Restored 2005	8	2006-09-07	September	2006	2	Nematoda	42	5347.59	Nematoda	Nematoda
Restored 2005	8	2006-09-07	September	2006	2	Turbellaria	2	254.647	Turbellaria	Nemertea/Turbellaria
Restored 2005	8	2006-09-07	September	2006	2	Protodriloides chaetifer	1	127.324	Archiannelida	Polychaete
Restored 2005	8	2006-09-07	September	2006	2	Nemertea	4	509.295	Nemertea	Nemertea/Turbellaria
Restored 2005	8	2006-09-07	September	2006	3	Hypogastruridae	3	381.971	Collembola	Insect, Arachnid, Collembola
Restored 2005	8	2006-09-07	September	2006	3	Talitridae, juv.	2	254.647	Terrestrial Amphipod	Terrestrial amphipod/isopod
Restored 2005	8	2006-09-07	September	2006	3	Megalorchestia pugettensis	3	381.971	Terrestrial Amphipod	Terrestrial amphipod/isopod
Restored 2005	8	2006-09-07	September	2006	3	Oligochaeta	73	9294.63	Oligochaeta	Oligochaeta
Restored 2005	8	2006-09-07	September	2006	3	Nematoda	36	4583.65	Nematoda	Nematoda
Restored 2005	8	2006-09-07	September	2006	3	Turbellaria	1	127.324	Turbellaria	Nemertea/Turbellaria
Restored 2005	8	2006-09-07	September	2006	3	Protodriloides chaetifer	1	127.324	Archiannelida	Polychaete
Restored 2005	8	2006-09-07	September	2006	3	Nemertea	1	127.324	Nemertea	Nemertea/Turbellaria
Restored 2005	8	2006-09-07	September	2006	4	Talitridae, juv.	2	254.647	Terrestrial Amphipod	Terrestrial amphipod/isopod
Restored 2005	8	2006-09-07	September	2006	4	Hypogastruridae	5	636.618	Collembola	Insect, Arachnid, Collembola
Restored 2005	8	2006-09-07	September	2006	4	Acari	2	254.647	Arachnid	Insect, Arachnid, Collembola
Restored 2005	8	2006-09-07	September	2006	4	Mussel, juv.	1	127.324	Bivalve	Mollusk
Restored 2005	8	2006-09-07	September	2006	4	Megalorchestia pugettensis	4	509.295	Terrestrial Amphipod	Terrestrial amphipod/isopod
Restored 2005	8	2006-09-07	September	2006	4	Oligochaeta	95	12095.7	Oligochaeta	Oligochaeta
Restored 2005	8	2006-09-07	September	2006	4	Nematoda	59	7512.1	Nematoda	Nematoda
Restored 2005	8	2006-09-07	September	2006	4	Turbellaria	5	636.618	Turbellaria	Nemertea/Turbellaria
Restored 2005	8	2006-09-07	September	2006	4	Protodriloides chaetifer	1	127.324	Archiannelida	Polychaete
Restored 2005	8	2006-09-07	September	2006	5	Staphylinidae	3	381.971	Insect adult	Insect, Arachnid, Collembola
Restored 2005	8	2006-09-07	September	2006	5	Acari	2	254.647	Arachnid	Insect, Arachnid, Collembola
Restored 2005	8	2006-09-07	September	2006	5	Talitridae, juv.	1	127.324	Terrestrial Amphipod	Terrestrial amphipod/isopod
Restored 2005	8	2006-09-07	September	2006	5	Mussel, juv.	1	127.324	Bivalve	Mollusk
Restored 2005	8	2006-09-07	September	2006	5	Coleoptera larvae	1	127.324	Insect larvae	Insect, Arachnid, Collembola
Restored 2005	8	2006-09-07	September	2006	5	Gnorimosphaeroma oregonense	1	127.324	Aquatic Isopod	Aquatic crustacean
Restored 2005	8	2006-09-07	September	2006	5	Oligochaeta	78	9931.25	Oligochaeta	Oligochaeta
Restored 2005	8	2006-09-07	September	2006	5	Nematoda	20	2546.47	Nematoda	Nematoda
Restored 2005	8	2006-09-07	September	2006	5	Turbellaria	9	1145.91	Turbellaria	Nemertea/Turbellaria
Restored 2005	8	2006-09-07	September	2006	6	Acari	1	127.324	Arachnid	Insect, Arachnid, Collembola
Restored 2005	8	2006-09-07	September	2006	6	Hypogastruridae	1	127.324	Collembola	Insect, Arachnid, Collembola
Restored 2005	8	2006-09-07	September	2006	6	Staphylinidae	1	127.324	Insect adult	Insect, Arachnid, Collembola
Restored 2005	8	2006-09-07	September	2006	6	Megalorchestia pugettensis	3	381.971	Terrestrial Amphipod	Terrestrial amphipod/isopod
Restored 2005	8	2006-09-07	September	2006	6	Oligochaeta	179	22790.9	Oligochaeta	Oligochaeta
Restored 2005	8	2006-09-07	September	2006	6	Nematoda	10	1273.24	Nematoda	Nematoda
Restored 2005	8	2006-09-07	September	2006	6	Turbellaria	2	254.647	Turbellaria	Nemertea/Turbellaria
Restored 2005	8	2006-09-07	September	2006	6	Protodriloides chaetifer	3	381.971	Archiannelida	Polychaete
Restored 2005	8	2006-09-07	September	2006	6	Nemertea	1	127.324	Nemertea	Nemertea/Turbellaria
Restored 2005	8	2006-09-07	September	2006	6	Oniscoidea, juv.	1	127.324	Terrestrial Isopod	Terrestrial amphipod/isopod
Restored 2005	8	2006-09-07	September	2006	7	Hypogastruridae	1	127.324	Collembola	Insect, Arachnid, Collembola
Restored 2005	8	2006-09-07	September	2006	7	Exosphaeroma inornata	10	1273.24	Aquatic Isopod	Aquatic crustacean
Restored 2005	8	2006-09-07	September	2006	7	Traskorchestia traskiana	5	636.618	Terrestrial Amphipod	Terrestrial amphipod/isopod
Restored 2005	8	2006-09-07	September	2006	7	Oligochaeta	161	20499.1	Oligochaeta	Oligochaeta
Restored 2005	8	2006-09-07	September	2006	7	Nematoda	25	3183.09	Nematoda	Nematoda
Restored 2005	8	2006-09-07	September	2006	7	Capitellidae	1	127.324	Capitellidae	Polychaete
Restored 2005	8	2006-09-07	September	2006	7	Turbellaria	11	1400.56	Turbellaria	Nemertea/Turbellaria
Restored 2005	8	2006-09-07	September	2006	7	Protodriloides chaetifer	3	381.971	Archiannelida	Polychaete
Restored 2005	12	2006-09-07	September	2006	1	Staphylinidae	1	127.324	Insect adult	Insect, Arachnid, Collembola
Restored 2005	12	2006-09-07	September	2006	1	Mussel, juv.	1	127.324	Bivalve	Mollusk
Restored 2005	12	2006-09-07	September	2006	1	Megalorchestia pugettensis	1	127.324	Terrestrial Amphipod	Terrestrial amphipod/isopod
Restored 2005	12	2006-09-07	September	2006	1	Acari	1	127.324	Arachnid	Insect, Arachnid, Collembola
Restored 2005	12	2006-09-07	September	2006	1	Traskorchestia georgiana	6	763.942	Terrestrial Amphipod	Terrestrial amphipod/isopod
Restored 2005	12	2006-09-07	September	2006	1	Traskorchestia traskiana	104	13241.7	Terrestrial Amphipod	Terrestrial amphipod/isopod
Restored 2005	12	2006-09-07	September	2006	1	Talitridae, juv.	125	15915.5	Terrestrial Amphipod	Terrestrial amphipod/isopod
Restored 2005	12	2006-09-07	September	2006	1	Nematoda	2	254.647	Nematoda	Nematoda
Restored 2005	12	2006-09-07	September	2006	1	Oligochaeta	6	763.942	Oligochaeta	Oligochaeta
Restored 2005	12	2006-09-07	September	2006	2	Mussel, juv.	1	127.324	Bivalve	Mollusk
Restored 2005	12	2006-09-07	September	2006	2	Megalorchestia pugettensis	8	1018.59	Terrestrial Amphipod	Terrestrial amphipod/isopod
Restored 2005	12	2006-09-07	September	2006	2	Nemertea	2	254.647	Nemertea	Nemertea/Turbellaria
Restored 2005	12	2006-09-07	September	2006	2	Traskorchestia traskiana	5	636.618	Terrestrial Amphipod	Terrestrial amphipod/isopod
Restored 2005	12	2006-09-07	September	2006	2	Talitridae, juv.	15	1909.85	Terrestrial Amphipod	Terrestrial amphipod/isopod
Restored 2005	12	2006-09-07	September	2006	2	Nematoda	9	1145.91	Nematoda	Nematoda
Restored 2005	12	2006-09-07	September	2006	2	Oligochaeta	27	3437.74	Oligochaeta	Oligochaeta
Restored 2005	12	2006-09-07	September	2006	3	Sphaeroceridae	3	381.971	Insect adult	Insect, Arachnid, Collembola
Restored 2005	12	2006-09-07	September	2006	3	Megalorchestia pugettensis	9	1145.91	Terrestrial Amphipod	Terrestrial amphipod/isopod
Restored 2005	12	2006-09-07	September	2006	3	Nemertea	1	127.324	Nemertea	Nemertea/Turbellaria
Restored 2005	12	2006-09-07	September	2006	3	Traskorchestia georgiana	1	127.324	Terrestrial Amphipod	Terrestrial amphipod/isopod
Restored 2005	12	2006-09-07	September	2006	3	Traskorchestia traskiana	6	763.942	Terrestrial Amphipod	Terrestrial amphipod/isopod
Restored 2005	12	2006-09-07	September	2006	3	Talitridae, juv.	27	3437.74	Terrestrial Amphipod	Terrestrial amphipod/isopod
Restored 2005	12	2006-09-07	September	2006	3	Nematoda	3	381.971	Nematoda	Nematoda
Restored 2005	12	2006-09-07	September	2006	3	Oligochaeta	38	4838.3	Oligochaeta	Oligochaeta
Restored 2005	12	2006-09-07	September	2006	4	Sphaeroceridae	1	127.324	Insect adult	Insect, Arachnid, Collembola
Restored 2005	12	2006-09-07	September	2006	4	Traskorchestia traskiana	13	1655.21	Terrestrial Amphipod	Terrestrial amphipod/isopod
Restored 2005	12	2006-09-07	September	2006	4	Talitridae, juv.	123	15660.8	Terrestrial Amphipod	Terrestrial amphipod/isopod
Restored 2005	12	2006-09-07	September	2006	4	Nematoda	9	1145.91	Nematoda	Nematoda
Restored 2005	12	2006-09-07	September	2006	4	Oligochaeta	34	4329	Oligochaeta	Oligochaeta
Restored 2005	12	2006-09-07	September	2006	5	Ephydridae larvae	1	127.324	Insect larvae	Insect, Arachnid, Collembola
Restored 2005	12	2006-09-07	September	2006	5	Sphaeroceridae	1	127.324	Insect adult	Insect, Arachnid, Collembola
Restored 2005	12	2006-09-07	September	2006	5	Megalorchestia pugettensis	1	127.324	Terrestrial Amphipod	Terrestrial amphipod/isopod
Restored 2005	12	2006-09-07	September	2006	5	Traskorchestia traskiana	8	1018.59	Terrestrial Amphipod	Terrestrial amphipod/isopod
Restored 2005	12	2006-09-07	September	2006	5	Talitridae, juv.	36	4583.65	Terrestrial Amphipod	Terrestrial amphipod/isopod
Restored 2005	12	2006-09-07	September	2006	5	Nematoda	2	254.647	Nematoda	Nematoda
Restored 2005	12	2006-09-07	September	2006	5	Oligochaeta	40	5092.95	Oligochaeta	Oligochaeta
Restored 2005	12	2006-09-07	September	2006	6	Coleoptera larvae	1	127.324	Insect larvae	Insect, Arachnid, Collembola
Restored 2005	12	2006-09-07	September	2006	6	Sphaeroceridae	1	127.324	Insect adult	Insect, Arachnid, Collembola
Restored 2005	12	2006-09-07	September	2006	6	Megalorchestia pugettensis	10	1273.24	Terrestrial Amphipod	Terrestrial amphipod/isopod
Restored 2005	12	2006-09-07	September	2006	6	Talitridae, juv.	7	891.266	Terrestrial Amphipod	Terrestrial amphipod/isopod
Restored 2005	12	2006-09-07	September	2006	6	Nematoda	1	127.324	Nematoda	Nematoda
Restored 2005	12	2006-09-07	September	2006	6	Oligochaeta	37	4710.98	Oligochaeta	Oligochaeta
Restored 2005	12	2006-09-07	September	2006	7	Chironomidae adult	1	127.324	Insect adult	Insect, Arachnid, Collembola
Restored 2005	12	2006-09-07	September	2006	7	Chironomidae larvae	1	127.324	Insect larvae	Insect, Arachnid, Collembola
Restored 2005	12	2006-09-07	September	2006	7	Oligochaeta	62	7894.07	Oligochaeta	Oligochaeta
Restored 2005	12	2006-09-07	September	2006	7	Megalorchestia pugettensis	16	2037.18	Terrestrial Amphipod	Terrestrial amphipod/isopod
Restored 2005	12	2006-09-07	September	2006	7	Acari	1	127.324	Arachnid	Insect, Arachnid, Collembola
Restored 2005	12	2006-09-07	September	2006	7	Talitridae, juv.	2	254.647	Terrestrial Amphipod	Terrestrial amphipod/isopod
Restored 2005	12	2006-09-07	September	2006	7	Nematoda	2	254.647	Nematoda	Nematoda
Reference	5	2008-06-04	June	2008	1	Nematoda	15	1909.85	Nematoda	Nematoda
Reference	5	2008-06-04	June	2008	1	Oligochaeta	145	18461.9	Oligochaeta	Oligochaeta
Reference	5	2008-06-04	June	2008	1	Mytilus edulis	1	127.324	Bivalve	Mollusk
Reference	5	2008-06-04	June	2008	1	Exosphaeroma inornata	1	127.324	Aquatic Isopod	Aquatic crustacean
Reference	5	2008-06-04	June	2008	1	Gnorimosphaeroma insulare	1	127.324	Aquatic Isopod	Aquatic crustacean
Reference	5	2008-06-04	June	2008	1	Nereidae	1	127.324	Nereidae	Polychaete	juv.
Reference	5	2008-06-04	June	2008	1	Protodriloides chaetifer	1	127.324	Archiannelida	Polychaete
Reference	5	2008-06-04	June	2008	1	Paramoera sp.	24	3055.77	Aquatic Amphipod	Aquatic crustacean
Reference	5	2008-06-04	June	2008	1	Eogammarus confervicolus	32	4074.36	Aquatic Amphipod	Aquatic crustacean
Reference	5	2008-06-04	June	2008	2	Littorina scutulata egg case	1	127.324	Gastropod	Mollusk
Reference	5	2008-06-04	June	2008	2	Nematoda	8	1018.59	Nematoda	Nematoda
Reference	5	2008-06-04	June	2008	2	Oligochaeta	63	8021.39	Oligochaeta	Oligochaeta
Reference	5	2008-06-04	June	2008	2	Paramoera sp.	15	1909.85	Aquatic Amphipod	Aquatic crustacean
Reference	5	2008-06-04	June	2008	2	Eogammarus confervicolus	38	4838.3	Aquatic Amphipod	Aquatic crustacean
Reference	5	2008-06-04	June	2008	2	Gnorimosphaeroma insulare	2	254.647	Aquatic Isopod	Aquatic crustacean
Reference	5	2008-06-04	June	2008	3	Oligochaeta	50	6366.18	Oligochaeta	Oligochaeta
Reference	5	2008-06-04	June	2008	3	Nematoda	2	254.647	Nematoda	Nematoda
Reference	5	2008-06-04	June	2008	3	Allorchestes sp.	1	127.324	Aquatic Amphipod	Aquatic crustacean
Reference	5	2008-06-04	June	2008	3	Eogammarus confervicolus	32	4074.36	Aquatic Amphipod	Aquatic crustacean
Reference	5	2008-06-04	June	2008	3	Paramoera sp.	6	763.942	Aquatic Amphipod	Aquatic crustacean
Reference	5	2008-06-04	June	2008	3	Gnorimosphaeroma insulare	3	381.971	Aquatic Isopod	Aquatic crustacean
Reference	5	2008-06-04	June	2008	4	Eogammarus confervicolus	50	6366.18	Aquatic Amphipod	Aquatic crustacean
Reference	5	2008-06-04	June	2008	4	Paramoera sp.	13	1655.21	Aquatic Amphipod	Aquatic crustacean
Reference	5	2008-06-04	June	2008	4	Nematoda	5	636.618	Nematoda	Nematoda
Reference	5	2008-06-04	June	2008	4	Oligochaeta	82	10440.5	Oligochaeta	Oligochaeta
Reference	5	2008-06-04	June	2008	4	Gnorimosphaeroma insulare	6	763.942	Aquatic Isopod	Aquatic crustacean
Reference	5	2008-06-04	June	2008	4	Nereidae	1	127.324	Nereidae	Polychaete	juv.
Reference	5	2008-06-04	June	2008	5	Nereis vexillosa	1	127.324	Nereidae	Polychaete
Reference	5	2008-06-04	June	2008	5	Huntemannia jadensis	1	127.324	Harpacticoid	Aquatic crustacean
Reference	5	2008-06-04	June	2008	5	Gnorimosphaeroma insulare	6	763.942	Aquatic Isopod	Aquatic crustacean
Reference	5	2008-06-04	June	2008	5	Eogammarus confervicolus	2	254.647	Aquatic Amphipod	Aquatic crustacean
Reference	5	2008-06-04	June	2008	5	Corophiidae, juv.	1	127.324	Aquatic Amphipod	Aquatic crustacean
Reference	5	2008-06-04	June	2008	5	Paramoera sp.	15	1909.85	Aquatic Amphipod	Aquatic crustacean
Reference	5	2008-06-04	June	2008	5	Eogammarus confervicolus	54	6875.48	Aquatic Amphipod	Aquatic crustacean
Reference	5	2008-06-04	June	2008	5	Nematoda	5	636.618	Nematoda	Nematoda
Reference	5	2008-06-04	June	2008	5	Oligochaeta	95	12095.7	Oligochaeta	Oligochaeta
Reference	5	2008-06-04	June	2008	6	Hemipodia simplex	2	254.647	Glyceridae	Polychaete
Reference	5	2008-06-04	June	2008	6	Americorophium sp.	2	254.647	Aquatic Amphipod	Aquatic crustacean
Reference	5	2008-06-04	June	2008	6	Mytilus edulis	2	254.647	Bivalve	Mollusk
Reference	5	2008-06-04	June	2008	6	Exosphaeroma inornata	1	127.324	Aquatic Isopod	Aquatic crustacean
Reference	5	2008-06-04	June	2008	6	Gnorimosphaeroma insulare	13	1655.21	Aquatic Isopod	Aquatic crustacean
Reference	5	2008-06-04	June	2008	6	Paramoera sp.	23	2928.44	Aquatic Amphipod	Aquatic crustacean
Reference	5	2008-06-04	June	2008	6	Eogammarus confervicolus	81	10313.2	Aquatic Amphipod	Aquatic crustacean
Reference	5	2008-06-04	June	2008	6	Nematoda	7	891.266	Nematoda	Nematoda
Reference	5	2008-06-04	June	2008	6	Oligochaeta	111	14132.9	Oligochaeta	Oligochaeta
Reference	5	2008-06-04	June	2008	6	Neanthes limnicola	1	127.324	Nereidae	Polychaete
Reference	5	2008-06-04	June	2008	7	Mytilus edulis	2	254.647	Bivalve	Mollusk
Reference	5	2008-06-04	June	2008	7	Paramoera sp.	29	3692.39	Aquatic Amphipod	Aquatic crustacean
Reference	5	2008-06-04	June	2008	7	Eogammarus confervicolus	50	6366.18	Aquatic Amphipod	Aquatic crustacean
Reference	5	2008-06-04	June	2008	7	Gnorimosphaeroma insulare	14	1782.53	Aquatic Isopod	Aquatic crustacean
Reference	5	2008-06-04	June	2008	7	Allorchestes sp.	1	127.324	Aquatic Amphipod	Aquatic crustacean
Reference	5	2008-06-04	June	2008	7	Nematoda	8	1018.59	Nematoda	Nematoda
Reference	5	2008-06-04	June	2008	7	Oligochaeta	69	8785.33	Oligochaeta	Oligochaeta
Reference	5	2008-06-04	June	2008	7	Nereidae	2	254.647	Nereidae	Polychaete	juv.
Reference	8	2008-06-04	June	2008	1	Talitridae, juv.	2	254.647	Terrestrial Amphipod	Terrestrial amphipod/isopod
Reference	8	2008-06-04	June	2008	1	Oligochaeta	152	19353.2	Oligochaeta	Oligochaeta
Reference	8	2008-06-04	June	2008	1	Nematoda	10	1273.24	Nematoda	Nematoda
Reference	8	2008-06-04	June	2008	1	Turbellaria	28	3565.06	Turbellaria	Nemertea/Turbellaria
Reference	8	2008-06-04	June	2008	1	Hesionidae, juv.	1	127.324	Hesionidae	Polychaete
Reference	8	2008-06-04	June	2008	2	Paramoera sp.	1	127.324	Aquatic Amphipod	Aquatic crustacean
Reference	8	2008-06-04	June	2008	2	Nematoda	45	5729.56	Nematoda	Nematoda
Reference	8	2008-06-04	June	2008	2	Turbellaria	38	4838.3	Turbellaria	Nemertea/Turbellaria
Reference	8	2008-06-04	June	2008	2	Protodriloides chaetifer	12	1527.88	Archiannelida	Polychaete
Reference	8	2008-06-04	June	2008	2	Nemertea	6	763.942	Nemertea	Nemertea/Turbellaria
Reference	8	2008-06-04	June	2008	2	Nitokra sp.	8	1018.59	Harpacticoid	Aquatic crustacean
Reference	8	2008-06-04	June	2008	2	Oligochaeta	188	23936.8	Oligochaeta	Oligochaeta
Reference	8	2008-06-04	June	2008	3	Acari	8	1018.59	Arachnid	Insect, Arachnid, Collembola
Reference	8	2008-06-04	June	2008	3	Turbellaria	42	5347.59	Turbellaria	Nemertea/Turbellaria
Reference	8	2008-06-04	June	2008	3	Oligochaeta	191	24318.8	Oligochaeta	Oligochaeta
Reference	8	2008-06-04	June	2008	3	Mussel, juv.	1	127.324	Bivalve	Mollusk
Reference	8	2008-06-04	June	2008	3	Protodriloides chaetifer	2	254.647	Archiannelida	Polychaete
Reference	8	2008-06-04	June	2008	3	Nematoda	83	10567.9	Nematoda	Nematoda
Reference	8	2008-06-04	June	2008	4	Nematoda	16	2037.18	Nematoda	Nematoda
Reference	8	2008-06-04	June	2008	4	Ectinosomatidae	2	254.647	Harpacticoid	Aquatic crustacean
Reference	8	2008-06-04	June	2008	4	Mussel, juv.	1	127.324	Bivalve	Mollusk
Reference	8	2008-06-04	June	2008	4	Turbellaria	49	6238.86	Turbellaria	Nemertea/Turbellaria
Reference	8	2008-06-04	June	2008	4	Oligochaeta	120	15278.8	Oligochaeta	Oligochaeta
Reference	8	2008-06-04	June	2008	4	Nemertea	54	6875.48	Nemertea	Nemertea/Turbellaria
Reference	8	2008-06-04	June	2008	5	Acari	2	254.647	Arachnid	Insect, Arachnid, Collembola
Reference	8	2008-06-04	June	2008	5	Nitokra sp.	1	127.324	Harpacticoid	Aquatic crustacean
Reference	8	2008-06-04	June	2008	5	Ectinosomatidae	2	254.647	Harpacticoid	Aquatic crustacean
Reference	8	2008-06-04	June	2008	5	Turbellaria	31	3947.03	Turbellaria	Nemertea/Turbellaria
Reference	8	2008-06-04	June	2008	5	Nemertea	20	2546.47	Nemertea	Nemertea/Turbellaria
Reference	8	2008-06-04	June	2008	5	Oligochaeta	232	29539.1	Oligochaeta	Oligochaeta
Reference	8	2008-06-04	June	2008	5	Nematoda	108	13751	Nematoda	Nematoda
Reference	8	2008-06-04	June	2008	6	Chironomidae larvae	1	127.324	Insect larvae	Insect, Arachnid, Collembola
Reference	8	2008-06-04	June	2008	6	Protodriloides chaetifer	1	127.324	Archiannelida	Polychaete
Reference	8	2008-06-04	June	2008	6	Turbellaria	22	2801.12	Turbellaria	Nemertea/Turbellaria
Reference	8	2008-06-04	June	2008	6	Nemertea	12	1527.88	Nemertea	Nemertea/Turbellaria
Reference	8	2008-06-04	June	2008	6	Oligochaeta	200	25464.7	Oligochaeta	Oligochaeta
Reference	8	2008-06-04	June	2008	6	Nematoda	76	9676.6	Nematoda	Nematoda
Reference	8	2008-06-04	June	2008	6	Paramoera sp.	1	127.324	Aquatic Amphipod	Aquatic crustacean
Reference	8	2008-06-04	June	2008	7	Laophontidae	1	127.324	Harpacticoid	Aquatic crustacean
Reference	8	2008-06-04	June	2008	7	Oligochaeta	173	22027	Oligochaeta	Oligochaeta
Reference	8	2008-06-04	June	2008	7	Turbellaria	8	1018.59	Turbellaria	Nemertea/Turbellaria
Reference	8	2008-06-04	June	2008	7	Nemertea	20	2546.47	Nemertea	Nemertea/Turbellaria
Reference	8	2008-06-04	June	2008	7	Nematoda	23	2928.44	Nematoda	Nematoda
Reference	12	2008-06-04	June	2008	1	Oligochaeta	36	4583.65	Oligochaeta	Oligochaeta
Reference	12	2008-06-04	June	2008	1	Nematoda	1	127.324	Nematoda	Nematoda
Reference	12	2008-06-04	June	2008	1	Empididae larvae	1	127.324	Insect larvae	Insect, Arachnid, Collembola
Reference	12	2008-06-04	June	2008	1	Grandidierella japonica	1	127.324	Aquatic Amphipod	Aquatic crustacean
Reference	12	2008-06-04	June	2008	1	Megalorchestia pugettensis	1	127.324	Terrestrial Amphipod	Terrestrial amphipod/isopod
Reference	12	2008-06-04	June	2008	1	Traskorchestia traskiana	3	381.971	Terrestrial Amphipod	Terrestrial amphipod/isopod
Reference	12	2008-06-04	June	2008	1	Talitridae, juv.	31	3947.03	Terrestrial Amphipod	Terrestrial amphipod/isopod
Reference	12	2008-06-04	June	2008	2	Talitridae, juv.	29	3692.39	Terrestrial Amphipod	Terrestrial amphipod/isopod
Reference	12	2008-06-04	June	2008	2	Oligochaeta	34	4329	Oligochaeta	Oligochaeta
Reference	12	2008-06-04	June	2008	2	Nematoda	1	127.324	Nematoda	Nematoda
Reference	12	2008-06-04	June	2008	2	Mussel, juv.	1	127.324	Bivalve	Mollusk
Reference	12	2008-06-04	June	2008	2	Capitellidae	2	254.647	Capitellidae	Polychaete
Reference	12	2008-06-04	June	2008	2	Valvifera, juv.	1	127.324	Aquatic Isopod	Aquatic crustacean	isopod
Reference	12	2008-06-04	June	2008	2	Megalorchestia pugettensis	1	127.324	Terrestrial Amphipod	Terrestrial amphipod/isopod
Reference	12	2008-06-04	June	2008	2	Traskorchestia traskiana	12	1527.88	Terrestrial Amphipod	Terrestrial amphipod/isopod
Reference	12	2008-06-04	June	2008	3	Talitridae, juv.	87	11077.2	Terrestrial Amphipod	Terrestrial amphipod/isopod
Reference	12	2008-06-04	June	2008	3	Oligochaeta	59	7512.1	Oligochaeta	Oligochaeta
Reference	12	2008-06-04	June	2008	3	Nematoda	2	254.647	Nematoda	Nematoda
Reference	12	2008-06-04	June	2008	3	Nemertea	4	509.295	Nemertea	Nemertea/Turbellaria
Reference	12	2008-06-04	June	2008	3	Staphylinidae	2	254.647	Insect adult	Insect, Arachnid, Collembola
Reference	12	2008-06-04	June	2008	3	Amphipod, juv.	2	254.647	Aquatic Amphipod	Aquatic crustacean	aquatic
Reference	12	2008-06-04	June	2008	3	Traskorchestia traskiana	11	1400.56	Terrestrial Amphipod	Terrestrial amphipod/isopod
Reference	12	2008-06-04	June	2008	4	Acari	2	254.647	Arachnid	Insect, Arachnid, Collembola
Reference	12	2008-06-04	June	2008	4	Talitridae, juv.	37	4710.98	Terrestrial Amphipod	Terrestrial amphipod/isopod
Reference	12	2008-06-04	June	2008	4	Oligochaeta	41	5220.27	Oligochaeta	Oligochaeta
Reference	12	2008-06-04	June	2008	4	Nematoda	2	254.647	Nematoda	Nematoda
Reference	12	2008-06-04	June	2008	4	Nemertea	1	127.324	Nemertea	Nemertea/Turbellaria
Reference	12	2008-06-04	June	2008	4	Capitellidae	2	254.647	Capitellidae	Polychaete
Reference	12	2008-06-04	June	2008	4	Traskorchestia traskiana	10	1273.24	Terrestrial Amphipod	Terrestrial amphipod/isopod
Reference	12	2008-06-04	June	2008	5	Acari	1	127.324	Arachnid	Insect, Arachnid, Collembola
Reference	12	2008-06-04	June	2008	5	Talitridae, juv.	89	11331.8	Terrestrial Amphipod	Terrestrial amphipod/isopod
Reference	12	2008-06-04	June	2008	5	Oligochaeta	56	7130.12	Oligochaeta	Oligochaeta
Reference	12	2008-06-04	June	2008	5	Nematoda	3	381.971	Nematoda	Nematoda
Reference	12	2008-06-04	June	2008	5	Nemertea	2	254.647	Nemertea	Nemertea/Turbellaria
Reference	12	2008-06-04	June	2008	5	Capitellidae	2	254.647	Capitellidae	Polychaete
Reference	12	2008-06-04	June	2008	5	Traskorchestia traskiana	17	2164.5	Terrestrial Amphipod	Terrestrial amphipod/isopod
Reference	12	2008-06-04	June	2008	5	Traskorchestia georgiana	6	763.942	Terrestrial Amphipod	Terrestrial amphipod/isopod
Reference	12	2008-06-04	June	2008	6	Acari	1	127.324	Arachnid	Insect, Arachnid, Collembola
Reference	12	2008-06-04	June	2008	6	Talitridae, juv.	26	3310.42	Terrestrial Amphipod	Terrestrial amphipod/isopod
Reference	12	2008-06-04	June	2008	6	Oligochaeta	6	763.942	Oligochaeta	Oligochaeta
Reference	12	2008-06-04	June	2008	6	Capitellidae	5	636.618	Capitellidae	Polychaete
Reference	12	2008-06-04	June	2008	6	Traskorchestia traskiana	1	127.324	Terrestrial Amphipod	Terrestrial amphipod/isopod
Reference	12	2008-06-04	June	2008	7	Acari	1	127.324	Arachnid	Insect, Arachnid, Collembola
Reference	12	2008-06-04	June	2008	7	Talitridae, juv.	12	1527.88	Terrestrial Amphipod	Terrestrial amphipod/isopod
Reference	12	2008-06-04	June	2008	7	Capitellidae	29	3692.39	Capitellidae	Polychaete
Reference	12	2008-06-04	June	2008	7	Oligochaeta	11	1400.56	Oligochaeta	Oligochaeta
Reference	12	2008-06-04	June	2008	7	Traskorchestia traskiana	4	509.295	Terrestrial Amphipod	Terrestrial amphipod/isopod
Restored 2005	5	2008-06-04	June	2008	1	Acari	5	636.618	Arachnid	Insect, Arachnid, Collembola
Restored 2005	5	2008-06-04	June	2008	1	Isotomidae	5	636.618	Collembola	Insect, Arachnid, Collembola
Restored 2005	5	2008-06-04	June	2008	1	Turbellaria	6	763.942	Turbellaria	Nemertea/Turbellaria
Restored 2005	5	2008-06-04	June	2008	1	Staphylinidae	1	127.324	Insect adult	Insect, Arachnid, Collembola
Restored 2005	5	2008-06-04	June	2008	1	Ectinosomatidae	1	127.324	Harpacticoid	Aquatic crustacean
Restored 2005	5	2008-06-04	June	2008	1	Mussel, juv.	3	381.971	Bivalve	Mollusk
Restored 2005	5	2008-06-04	June	2008	1	Nemertea	5	636.618	Nemertea	Nemertea/Turbellaria
Restored 2005	5	2008-06-04	June	2008	1	Exosphaeroma inornata	2	254.647	Aquatic Isopod	Aquatic crustacean
Restored 2005	5	2008-06-04	June	2008	1	Phyllodoce sp.	1	127.324	Phyllodocidae	Polychaete	juv.
Restored 2005	5	2008-06-04	June	2008	1	Nematoda	35	4456.33	Nematoda	Nematoda
Restored 2005	5	2008-06-04	June	2008	1	Oligochaeta	90	11459.1	Oligochaeta	Oligochaeta
Restored 2005	5	2008-06-04	June	2008	2	Acari	1	127.324	Arachnid	Insect, Arachnid, Collembola
Restored 2005	5	2008-06-04	June	2008	2	Hypogastruridae	1	127.324	Collembola	Insect, Arachnid, Collembola
Restored 2005	5	2008-06-04	June	2008	2	Leptastacidae	1	127.324	Harpacticoid	Aquatic crustacean
Restored 2005	5	2008-06-04	June	2008	2	Turbellaria	11	1400.56	Turbellaria	Nemertea/Turbellaria
Restored 2005	5	2008-06-04	June	2008	2	Isotomidae	16	2037.18	Collembola	Insect, Arachnid, Collembola
Restored 2005	5	2008-06-04	June	2008	2	Mussel, juv.	2	254.647	Bivalve	Mollusk
Restored 2005	5	2008-06-04	June	2008	2	Ostracoda	1	127.324	Ostracoda	Aquatic crustacean
Restored 2005	5	2008-06-04	June	2008	2	Exosphaeroma inornata	5	636.618	Aquatic Isopod	Aquatic crustacean
Restored 2005	5	2008-06-04	June	2008	2	Nematoda	26	3310.42	Nematoda	Nematoda
Restored 2005	5	2008-06-04	June	2008	2	Oligochaeta	31	3947.03	Oligochaeta	Oligochaeta
Restored 2005	5	2008-06-04	June	2008	3	Acari	2	254.647	Arachnid	Insect, Arachnid, Collembola
Restored 2005	5	2008-06-04	June	2008	3	Isotomidae	11	1400.56	Collembola	Insect, Arachnid, Collembola
Restored 2005	5	2008-06-04	June	2008	3	Mytilus edulis	1	127.324	Bivalve	Mollusk
Restored 2005	5	2008-06-04	June	2008	3	Turbellaria	7	891.266	Turbellaria	Nemertea/Turbellaria
Restored 2005	5	2008-06-04	June	2008	3	Allorchestes sp.	1	127.324	Aquatic Amphipod	Aquatic crustacean
Restored 2005	5	2008-06-04	June	2008	3	Hypogastruridae	1	127.324	Collembola	Insect, Arachnid, Collembola
Restored 2005	5	2008-06-04	June	2008	3	Nematoda	27	3437.74	Nematoda	Nematoda
Restored 2005	5	2008-06-04	June	2008	3	Oligochaeta	79	10058.6	Oligochaeta	Oligochaeta
Restored 2005	5	2008-06-04	June	2008	4	Chironomidae larvae	1	127.324	Insect larvae	Insect, Arachnid, Collembola
Restored 2005	5	2008-06-04	June	2008	4	Acari	2	254.647	Arachnid	Insect, Arachnid, Collembola
Restored 2005	5	2008-06-04	June	2008	4	Turbellaria	32	4074.36	Turbellaria	Nemertea/Turbellaria
Restored 2005	5	2008-06-04	June	2008	4	Nematoda	14	1782.53	Nematoda	Nematoda
Restored 2005	5	2008-06-04	June	2008	4	Oligochaeta	62	7894.07	Oligochaeta	Oligochaeta
Restored 2005	5	2008-06-04	June	2008	4	Isotomidae	2	254.647	Collembola	Insect, Arachnid, Collembola
Restored 2005	5	2008-06-04	June	2008	4	Mussel, juv.	1	127.324	Bivalve	Mollusk
Restored 2005	5	2008-06-04	June	2008	4	Nereidae	1	127.324	Nereidae	Polychaete	juv.
Restored 2005	5	2008-06-04	June	2008	4	Crangonidae, juv.	6	763.942	Crangonidae	Aquatic crustacean
Restored 2005	5	2008-06-04	June	2008	5	Mussel, juv.	2	254.647	Bivalve	Mollusk
Restored 2005	5	2008-06-04	June	2008	5	Nematoda	18	2291.83	Nematoda	Nematoda
Restored 2005	5	2008-06-04	June	2008	5	Oligochaeta	26	3310.42	Oligochaeta	Oligochaeta
Restored 2005	5	2008-06-04	June	2008	5	Crangonidae, juv.	1	127.324	Crangonidae	Aquatic crustacean
Restored 2005	5	2008-06-04	June	2008	5	Allorchestes sp.	1	127.324	Aquatic Amphipod	Aquatic crustacean
Restored 2005	5	2008-06-04	June	2008	5	Nereidae	2	254.647	Nereidae	Polychaete	juv.
Restored 2005	5	2008-06-04	June	2008	5	Isotomidae	20	2546.47	Collembola	Insect, Arachnid, Collembola
Restored 2005	5	2008-06-04	June	2008	5	Turbellaria	2	254.647	Turbellaria	Nemertea/Turbellaria
Restored 2005	5	2008-06-04	June	2008	6	Isotomidae	4	509.295	Collembola	Insect, Arachnid, Collembola
Restored 2005	5	2008-06-04	June	2008	6	Acari	1	127.324	Arachnid	Insect, Arachnid, Collembola
Restored 2005	5	2008-06-04	June	2008	6	Chironomidae larvae	1	127.324	Insect larvae	Insect, Arachnid, Collembola
Restored 2005	5	2008-06-04	June	2008	6	Turbellaria	1	127.324	Turbellaria	Nemertea/Turbellaria
Restored 2005	5	2008-06-04	June	2008	6	Oligochaeta	45	5729.56	Oligochaeta	Oligochaeta
Restored 2005	5	2008-06-04	June	2008	6	Nematoda	23	2928.44	Nematoda	Nematoda
Restored 2005	5	2008-06-04	June	2008	6	Exosphaeroma inornata	1	127.324	Aquatic Isopod	Aquatic crustacean
Restored 2005	5	2008-06-04	June	2008	6	Protodriloides chaetifer	4	509.295	Archiannelida	Polychaete
Restored 2005	5	2008-06-04	June	2008	6	Nerilla sp.	1	127.324	Archiannelida	Polychaete
Restored 2005	5	2008-06-04	June	2008	6	Hesionidae, juv.	3	381.971	Hesionidae	Polychaete
Restored 2005	5	2008-06-04	June	2008	7	Mussel, juv.	4	509.295	Bivalve	Mollusk
Restored 2005	5	2008-06-04	June	2008	7	Ostracoda	1	127.324	Ostracoda	Aquatic crustacean
Restored 2005	5	2008-06-04	June	2008	7	Ectinosomatidae	3	381.971	Harpacticoid	Aquatic crustacean
Restored 2005	5	2008-06-04	June	2008	7	Isotomidae	18	2291.83	Collembola	Insect, Arachnid, Collembola
Restored 2005	5	2008-06-04	June	2008	7	Acari	3	381.971	Arachnid	Insect, Arachnid, Collembola
Restored 2005	5	2008-06-04	June	2008	7	Mytilus edulis	2	254.647	Bivalve	Mollusk
Restored 2005	5	2008-06-04	June	2008	7	Turbellaria	5	636.618	Turbellaria	Nemertea/Turbellaria
Restored 2005	5	2008-06-04	June	2008	7	Crangonidae, juv.	1	127.324	Crangonidae	Aquatic crustacean
Restored 2005	5	2008-06-04	June	2008	7	Protodriloides chaetifer	5	636.618	Archiannelida	Polychaete
Restored 2005	5	2008-06-04	June	2008	7	Nematoda	30	3819.71	Nematoda	Nematoda
Restored 2005	5	2008-06-04	June	2008	7	Oligochaeta	16	2037.18	Oligochaeta	Oligochaeta
Restored 2005	5	2008-06-04	June	2008	7	Hesionidae, juv.	4	509.295	Hesionidae	Polychaete
Restored 2005	8	2008-06-04	June	2008	1	Turbellaria	15	1909.85	Turbellaria	Nemertea/Turbellaria
Restored 2005	8	2008-06-04	June	2008	1	Acari	5	636.618	Arachnid	Insect, Arachnid, Collembola
Restored 2005	8	2008-06-04	June	2008	1	Staphylinidae	1	127.324	Insect adult	Insect, Arachnid, Collembola
Restored 2005	8	2008-06-04	June	2008	1	Isotomidae	6	763.942	Collembola	Insect, Arachnid, Collembola
Restored 2005	8	2008-06-04	June	2008	1	Nematoda	12	1527.88	Nematoda	Nematoda
Restored 2005	8	2008-06-04	June	2008	1	Mussel, juv.	1	127.324	Bivalve	Mollusk
Restored 2005	8	2008-06-04	June	2008	1	Talitridae, juv.	7	891.266	Terrestrial Amphipod	Terrestrial amphipod/isopod
Restored 2005	8	2008-06-04	June	2008	1	Oligochaeta	49	6238.86	Oligochaeta	Oligochaeta
Restored 2005	8	2008-06-04	June	2008	2	Acari	1	127.324	Arachnid	Insect, Arachnid, Collembola
Restored 2005	8	2008-06-04	June	2008	2	Oligochaeta	92	11713.8	Oligochaeta	Oligochaeta
Restored 2005	8	2008-06-04	June	2008	2	Cumella vulgaris	1	127.324	Cumacea	Aquatic crustacean
Restored 2005	8	2008-06-04	June	2008	2	Turbellaria	3	381.971	Turbellaria	Nemertea/Turbellaria
Restored 2005	8	2008-06-04	June	2008	2	Paleanotus occidentale	1	127.324	Chrysopetalidae	Polychaete
Restored 2005	8	2008-06-04	June	2008	2	Nematoda	14	1782.53	Nematoda	Nematoda
Restored 2005	8	2008-06-04	June	2008	2	Talitridae, juv.	8	1018.59	Terrestrial Amphipod	Terrestrial amphipod/isopod
Restored 2005	8	2008-06-04	June	2008	3	Acari	1	127.324	Arachnid	Insect, Arachnid, Collembola
Restored 2005	8	2008-06-04	June	2008	3	Nematoda	11	1400.56	Nematoda	Nematoda
Restored 2005	8	2008-06-04	June	2008	3	Oligochaeta	26	3310.42	Oligochaeta	Oligochaeta
Restored 2005	8	2008-06-04	June	2008	3	Turbellaria	3	381.971	Turbellaria	Nemertea/Turbellaria
Restored 2005	8	2008-06-04	June	2008	3	Talitridae, juv.	2	254.647	Terrestrial Amphipod	Terrestrial amphipod/isopod
Restored 2005	8	2008-06-04	June	2008	3	Coleoptera	1	127.324	Insect adult	Insect, Arachnid, Collembola
Restored 2005	8	2008-06-04	June	2008	4	Isotomidae	7	891.266	Collembola	Insect, Arachnid, Collembola
Restored 2005	8	2008-06-04	June	2008	4	Hypogastruridae	1	127.324	Collembola	Insect, Arachnid, Collembola
Restored 2005	8	2008-06-04	June	2008	4	Talitridae, juv.	2	254.647	Terrestrial Amphipod	Terrestrial amphipod/isopod
Restored 2005	8	2008-06-04	June	2008	4	Oligochaeta	106	13496.3	Oligochaeta	Oligochaeta
Restored 2005	8	2008-06-04	June	2008	4	Turbellaria	2	254.647	Turbellaria	Nemertea/Turbellaria
Restored 2005	8	2008-06-04	June	2008	4	Nematoda	33	4201.68	Nematoda	Nematoda
Restored 2005	8	2008-06-04	June	2008	4	Mussel, juv.	1	127.324	Bivalve	Mollusk
Restored 2005	8	2008-06-04	June	2008	4	Crangonidae, juv.	1	127.324	Crangonidae	Aquatic crustacean
Restored 2005	8	2008-06-04	June	2008	5	Oligochaeta	24	3055.77	Oligochaeta	Oligochaeta
Restored 2005	8	2008-06-04	June	2008	5	Nematoda	21	2673.8	Nematoda	Nematoda
Restored 2005	8	2008-06-04	June	2008	5	Turbellaria	3	381.971	Turbellaria	Nemertea/Turbellaria
Restored 2005	8	2008-06-04	June	2008	5	Hypogastruridae	1	127.324	Collembola	Insect, Arachnid, Collembola
Restored 2005	8	2008-06-04	June	2008	6	Megalorchestia pugettensis	1	127.324	Terrestrial Amphipod	Terrestrial amphipod/isopod
Restored 2005	8	2008-06-04	June	2008	6	Nematoda	28	3565.06	Nematoda	Nematoda
Restored 2005	8	2008-06-04	June	2008	6	Turbellaria	4	509.295	Turbellaria	Nemertea/Turbellaria
Restored 2005	8	2008-06-04	June	2008	6	Oligochaeta	132	16806.7	Oligochaeta	Oligochaeta
Restored 2005	8	2008-06-04	June	2008	7	Oligochaeta	45	5729.56	Oligochaeta	Oligochaeta
Restored 2005	8	2008-06-04	June	2008	7	Nematoda	34	4329	Nematoda	Nematoda
Restored 2005	8	2008-06-04	June	2008	7	Turbellaria	7	891.266	Turbellaria	Nemertea/Turbellaria
Restored 2005	8	2008-06-04	June	2008	7	Talitridae, juv.	1	127.324	Terrestrial Amphipod	Terrestrial amphipod/isopod
Restored 2005	12	2008-06-04	June	2008	1	Megalorchestia pugettensis	1	127.324	Terrestrial Amphipod	Terrestrial amphipod/isopod
Restored 2005	12	2008-06-04	June	2008	1	Traskorchestia traskiana	8	1018.59	Terrestrial Amphipod	Terrestrial amphipod/isopod
Restored 2005	12	2008-06-04	June	2008	1	Talitridae, juv.	114	14514.9	Terrestrial Amphipod	Terrestrial amphipod/isopod
Restored 2005	12	2008-06-04	June	2008	1	Oligochaeta	81	10313.2	Oligochaeta	Oligochaeta
Restored 2005	12	2008-06-04	June	2008	1	Nematoda	1	127.324	Nematoda	Nematoda
Restored 2005	12	2008-06-04	June	2008	2	Talitridae, juv.	527	67099.6	Terrestrial Amphipod	Terrestrial amphipod/isopod
Restored 2005	12	2008-06-04	June	2008	2	Megalorchestia pugettensis	1	127.324	Terrestrial Amphipod	Terrestrial amphipod/isopod
Restored 2005	12	2008-06-04	June	2008	2	Traskorchestia traskiana	38	4838.3	Terrestrial Amphipod	Terrestrial amphipod/isopod
Restored 2005	12	2008-06-04	June	2008	2	Traskorchestia georgiana	27	3437.74	Terrestrial Amphipod	Terrestrial amphipod/isopod
Restored 2005	12	2008-06-04	June	2008	2	Oligochaeta	71	9039.98	Oligochaeta	Oligochaeta
Restored 2005	12	2008-06-04	June	2008	2	Turbellaria	1	127.324	Turbellaria	Nemertea/Turbellaria
Restored 2005	12	2008-06-04	June	2008	2	Nemertea	1	127.324	Nemertea	Nemertea/Turbellaria
Restored 2005	12	2008-06-04	June	2008	2	Isotomidae	1	127.324	Collembola	Insect, Arachnid, Collembola
Restored 2005	12	2008-06-04	June	2008	2	Detonella papillicornis	4	509.295	Terrestrial Isopod	Terrestrial amphipod/isopod
Restored 2005	12	2008-06-04	June	2008	3	Talitridae, juv.	411	52330	Terrestrial Amphipod	Terrestrial amphipod/isopod
Restored 2005	12	2008-06-04	June	2008	3	Mussel, juv.	1	127.324	Bivalve	Mollusk
Restored 2005	12	2008-06-04	June	2008	3	Oligochaeta	30	3819.71	Oligochaeta	Oligochaeta
Restored 2005	12	2008-06-04	June	2008	3	Traskorchestia traskiana	11	1400.56	Terrestrial Amphipod	Terrestrial amphipod/isopod
Restored 2005	12	2008-06-04	June	2008	3	Traskorchestia georgiana	8	1018.59	Terrestrial Amphipod	Terrestrial amphipod/isopod
Restored 2005	12	2008-06-04	June	2008	3	Talitridae, juv.	41	5220.27	Terrestrial Amphipod	Terrestrial amphipod/isopod
Restored 2005	12	2008-06-04	June	2008	3	Oligochaeta	30	3819.71	Oligochaeta	Oligochaeta
Restored 2005	12	2008-06-04	June	2008	4	Talitridae, juv.	5	636.618	Terrestrial Amphipod	Terrestrial amphipod/isopod
Restored 2005	12	2008-06-04	June	2008	4	Megalorchestia pugettensis	1	127.324	Terrestrial Amphipod	Terrestrial amphipod/isopod
Restored 2005	12	2008-06-04	June	2008	4	Oligochaeta	127	16170.1	Oligochaeta	Oligochaeta
Restored 2005	12	2008-06-04	June	2008	4	Nematoda	3	381.971	Nematoda	Nematoda
Restored 2005	12	2008-06-04	June	2008	5	Oligochaeta	149	18971.2	Oligochaeta	Oligochaeta
Restored 2005	12	2008-06-04	June	2008	5	Megalorchestia pugettensis	1	127.324	Terrestrial Amphipod	Terrestrial amphipod/isopod
Restored 2005	12	2008-06-04	June	2008	5	Talitridae, juv.	4	509.295	Terrestrial Amphipod	Terrestrial amphipod/isopod
Restored 2005	12	2008-06-04	June	2008	6	Oligochaeta	64	8148.71	Oligochaeta	Oligochaeta
Restored 2005	12	2008-06-04	June	2008	6	Coleoptera larvae	1	127.324	Insect larvae	Insect, Arachnid, Collembola
Restored 2005	12	2008-06-04	June	2008	6	Talitridae, juv.	2	254.647	Terrestrial Amphipod	Terrestrial amphipod/isopod
Restored 2005	12	2008-06-04	June	2008	7	Oligochaeta	121	15406.2	Oligochaeta	Oligochaeta
Restored 2005	12	2008-06-04	June	2008	7	Talitridae, juv.	4	509.295	Terrestrial Amphipod	Terrestrial amphipod/isopod
Restored 2005	12	2008-06-04	June	2008	7	Acari	1	127.324	Arachnid	Insect, Arachnid, Collembola
Restored 2005	12	2008-06-04	June	2008	7	Empididae larvae	1	127.324	Insect larvae	Insect, Arachnid, Collembola
Reference	5	2008-07-08	July	2008	1	Mytilus edulis	1	127.324	Bivalve	Mollusk
Reference	5	2008-07-08	July	2008	1	Turbellaria	35	4456.33	Turbellaria	Nemertea/Turbellaria
Reference	5	2008-07-08	July	2008	1	Nematoda	14	1782.53	Nematoda	Nematoda
Reference	5	2008-07-08	July	2008	1	Oligochaeta	92	11713.8	Oligochaeta	Oligochaeta
Reference	5	2008-07-08	July	2008	2	Mussel, juv.	2	254.647	Bivalve	Mollusk
Reference	5	2008-07-08	July	2008	2	Mytilus edulis	1	127.324	Bivalve	Mollusk
Reference	5	2008-07-08	July	2008	2	Eogammarus confervicolus	82	10440.5	Aquatic Amphipod	Aquatic crustacean
Reference	5	2008-07-08	July	2008	2	Oligochaeta	64	8148.71	Oligochaeta	Oligochaeta
Reference	5	2008-07-08	July	2008	2	Exosphaeroma inornata	6	763.942	Aquatic Isopod	Aquatic crustacean
Reference	5	2008-07-08	July	2008	2	Nematoda	4	509.295	Nematoda	Nematoda
Reference	5	2008-07-08	July	2008	2	Turbellaria	1	127.324	Turbellaria	Nemertea/Turbellaria
Reference	5	2008-07-08	July	2008	3	Mytilus edulis	1	127.324	Bivalve	Mollusk
Reference	5	2008-07-08	July	2008	3	Gnorimosphaeroma oregonense	35	4456.33	Aquatic Isopod	Aquatic crustacean
Reference	5	2008-07-08	July	2008	3	Talitridae, juv.	1	127.324	Terrestrial Amphipod	Terrestrial amphipod/isopod
Reference	5	2008-07-08	July	2008	3	Nereis vexillosa	1	127.324	Nereidae	Polychaete
Reference	5	2008-07-08	July	2008	3	Eogammarus confervicolus	78	9931.25	Aquatic Amphipod	Aquatic crustacean
Reference	5	2008-07-08	July	2008	3	Nematoda	5	636.618	Nematoda	Nematoda
Reference	5	2008-07-08	July	2008	3	Nemertea	2	254.647	Nemertea	Nemertea/Turbellaria
Reference	5	2008-07-08	July	2008	3	Oligochaeta	80	10185.9	Oligochaeta	Oligochaeta
Reference	5	2008-07-08	July	2008	4	Eogammarus confervicolus	83	10567.9	Aquatic Amphipod	Aquatic crustacean
Reference	5	2008-07-08	July	2008	4	Nematoda	10	1273.24	Nematoda	Nematoda
Reference	5	2008-07-08	July	2008	4	Protodriloides chaetifer	1	127.324	Archiannelida	Polychaete
Reference	5	2008-07-08	July	2008	4	Nemertea	2	254.647	Nemertea	Nemertea/Turbellaria
Reference	5	2008-07-08	July	2008	4	Turbellaria	2	254.647	Turbellaria	Nemertea/Turbellaria
Reference	5	2008-07-08	July	2008	4	Oligochaeta	113	14387.6	Oligochaeta	Oligochaeta
Reference	5	2008-07-08	July	2008	5	Mytilus edulis	2	254.647	Bivalve	Mollusk
Reference	5	2008-07-08	July	2008	5	Eogammarus confervicolus	43	5474.92	Aquatic Amphipod	Aquatic crustacean
Reference	5	2008-07-08	July	2008	5	Gnorimosphaeroma oregonense	16	2037.18	Aquatic Isopod	Aquatic crustacean
Reference	5	2008-07-08	July	2008	5	Oligochaeta	35	4456.33	Oligochaeta	Oligochaeta
Reference	5	2008-07-08	July	2008	5	Laophontidae	1	127.324	Harpacticoid	Aquatic crustacean
Reference	5	2008-07-08	July	2008	5	Paramoera sp.	3	381.971	Aquatic Amphipod	Aquatic crustacean
Reference	5	2008-07-08	July	2008	6	Gnorimosphaeroma oregonense	1	127.324	Aquatic Isopod	Aquatic crustacean
Reference	5	2008-07-08	July	2008	6	Oligochaeta	9	1145.91	Oligochaeta	Oligochaeta
Reference	5	2008-07-08	July	2008	6	Paramoera sp.	4	509.295	Aquatic Amphipod	Aquatic crustacean
Reference	5	2008-07-08	July	2008	6	Eogammarus confervicolus	20	2546.47	Aquatic Amphipod	Aquatic crustacean
Reference	5	2008-07-08	July	2008	7	Nematoda	3	381.971	Nematoda	Nematoda
Reference	5	2008-07-08	July	2008	7	Oligochaeta	57	7257.45	Oligochaeta	Oligochaeta
Reference	5	2008-07-08	July	2008	7	Gnorimosphaeroma oregonense	12	1527.88	Aquatic Isopod	Aquatic crustacean
Reference	5	2008-07-08	July	2008	7	Eogammarus confervicolus	23	2928.44	Aquatic Amphipod	Aquatic crustacean
Reference	5	2008-07-08	July	2008	7	Mytilus edulis	2	254.647	Bivalve	Mollusk
Reference	5	2008-07-08	July	2008	7	Nereis vexillosa	1	127.324	Nereidae	Polychaete
Reference	8	2008-07-08	July	2008	1	Nematoda	6	763.942	Nematoda	Nematoda
Reference	8	2008-07-08	July	2008	1	Protodriloides chaetifer	10	1273.24	Archiannelida	Polychaete
Reference	8	2008-07-08	July	2008	1	Nemertea	23	2928.44	Nemertea	Nemertea/Turbellaria
Reference	8	2008-07-08	July	2008	1	Oligochaeta	179	22790.9	Oligochaeta	Oligochaeta
Reference	8	2008-07-08	July	2008	1	Nereis vexillosa	1	127.324	Nereidae	Polychaete
Reference	8	2008-07-08	July	2008	1	Turbellaria	31	3947.03	Turbellaria	Nemertea/Turbellaria
Reference	8	2008-07-08	July	2008	2	Nereidae	36	4583.65	Nereidae	Polychaete	juv.
Reference	8	2008-07-08	July	2008	2	Oligochaeta	143	18207.3	Oligochaeta	Oligochaeta
Reference	8	2008-07-08	July	2008	2	Nemertea	8	1018.59	Nemertea	Nemertea/Turbellaria
Reference	8	2008-07-08	July	2008	2	Nematoda	6	763.942	Nematoda	Nematoda
Reference	8	2008-07-08	July	2008	2	Turbellaria	34	4329	Turbellaria	Nemertea/Turbellaria
Reference	8	2008-07-08	July	2008	3	Nemertea	6	763.942	Nemertea	Nemertea/Turbellaria
Reference	8	2008-07-08	July	2008	3	Oligochaeta	154	19607.8	Oligochaeta	Oligochaeta
Reference	8	2008-07-08	July	2008	3	Nematoda	12	1527.88	Nematoda	Nematoda
Reference	8	2008-07-08	July	2008	3	Turbellaria	50	6366.18	Turbellaria	Nemertea/Turbellaria
Reference	8	2008-07-08	July	2008	4	Turbellaria	34	4329	Turbellaria	Nemertea/Turbellaria
Reference	8	2008-07-08	July	2008	4	Nematoda	1	127.324	Nematoda	Nematoda
Reference	8	2008-07-08	July	2008	4	Oligochaeta	60	7639.42	Oligochaeta	Oligochaeta
Reference	8	2008-07-08	July	2008	4	Nemertea	10	1273.24	Nemertea	Nemertea/Turbellaria
Reference	8	2008-07-08	July	2008	4	Protodriloides chaetifer	3	381.971	Archiannelida	Polychaete
Reference	8	2008-07-08	July	2008	5	Nematoda	4	509.295	Nematoda	Nematoda
Reference	8	2008-07-08	July	2008	5	Turbellaria	3	381.971	Turbellaria	Nemertea/Turbellaria
Reference	8	2008-07-08	July	2008	5	Oligochaeta	167	21263.1	Oligochaeta	Oligochaeta
Reference	8	2008-07-08	July	2008	5	Nemertea	8	1018.59	Nemertea	Nemertea/Turbellaria
Reference	8	2008-07-08	July	2008	5	Paramoera sp.	1	127.324	Aquatic Amphipod	Aquatic crustacean
Reference	8	2008-07-08	July	2008	5	Nereis vexillosa	1	127.324	Nereidae	Polychaete
Reference	8	2008-07-08	July	2008	6	Traskorchestia traskiana	1	127.324	Terrestrial Amphipod	Terrestrial amphipod/isopod
Reference	8	2008-07-08	July	2008	6	Talitridae, juv.	1	127.324	Terrestrial Amphipod	Terrestrial amphipod/isopod
Reference	8	2008-07-08	July	2008	6	Paramoera sp.	1	127.324	Aquatic Amphipod	Aquatic crustacean
Reference	8	2008-07-08	July	2008	6	Oligochaeta	58	7384.77	Oligochaeta	Oligochaeta
Reference	8	2008-07-08	July	2008	6	Turbellaria	4	509.295	Turbellaria	Nemertea/Turbellaria
Reference	8	2008-07-08	July	2008	6	Nematoda	11	1400.56	Nematoda	Nematoda
Reference	8	2008-07-08	July	2008	6	Nemertea	15	1909.85	Nemertea	Nemertea/Turbellaria
Reference	8	2008-07-08	July	2008	7	Ostracoda	1	127.324	Ostracoda	Aquatic crustacean
Reference	8	2008-07-08	July	2008	7	Oligochaeta	104	13241.7	Oligochaeta	Oligochaeta
Reference	8	2008-07-08	July	2008	7	Nemertea	27	3437.74	Nemertea	Nemertea/Turbellaria
Reference	8	2008-07-08	July	2008	7	Turbellaria	42	5347.59	Turbellaria	Nemertea/Turbellaria
Reference	8	2008-07-08	July	2008	7	Nematoda	10	1273.24	Nematoda	Nematoda
Reference	12	2008-07-08	July	2008	1	Talitridae, juv.	10	1273.24	Terrestrial Amphipod	Terrestrial amphipod/isopod
Reference	12	2008-07-08	July	2008	1	Oligochaeta	90	11459.1	Oligochaeta	Oligochaeta
Reference	12	2008-07-08	July	2008	1	Nematoda	3	381.971	Nematoda	Nematoda
Reference	12	2008-07-08	July	2008	1	Capitellidae	5	636.618	Capitellidae	Polychaete
Reference	12	2008-07-08	July	2008	1	Staphylinidae	1	127.324	Insect adult	Insect, Arachnid, Collembola
Reference	12	2008-07-08	July	2008	1	Empididae larvae	1	127.324	Insect larvae	Insect, Arachnid, Collembola
Reference	12	2008-07-08	July	2008	1	Nemertea	6	763.942	Nemertea	Nemertea/Turbellaria
Reference	12	2008-07-08	July	2008	1	Amphipod, juv.	1	127.324	Aquatic Amphipod	Aquatic crustacean	aquatic
Reference	12	2008-07-08	July	2008	1	Traskorchestia traskiana	5	636.618	Terrestrial Amphipod	Terrestrial amphipod/isopod
Reference	12	2008-07-08	July	2008	1	Traskorchestia georgiana	3	381.971	Terrestrial Amphipod	Terrestrial amphipod/isopod
Reference	12	2008-07-08	July	2008	2	Coleoptera larvae	2	254.647	Insect larvae	Insect, Arachnid, Collembola
Reference	12	2008-07-08	July	2008	2	Talitridae, juv.	93	11841.1	Terrestrial Amphipod	Terrestrial amphipod/isopod
Reference	12	2008-07-08	July	2008	2	Oligochaeta	81	10313.2	Oligochaeta	Oligochaeta
Reference	12	2008-07-08	July	2008	2	Capitellidae	3	381.971	Capitellidae	Polychaete
Reference	12	2008-07-08	July	2008	2	Nematoda	1	127.324	Nematoda	Nematoda
Reference	12	2008-07-08	July	2008	2	Traskorchestia traskiana	1	127.324	Terrestrial Amphipod	Terrestrial amphipod/isopod
Reference	12	2008-07-08	July	2008	2	Traskorchestia georgiana	10	1273.24	Terrestrial Amphipod	Terrestrial amphipod/isopod
Reference	12	2008-07-08	July	2008	2	Megalorchestia pugettensis	13	1655.21	Terrestrial Amphipod	Terrestrial amphipod/isopod
Reference	12	2008-07-08	July	2008	2	Collembola	1	127.324	Collembola	Insect, Arachnid, Collembola	tiny
Reference	12	2008-07-08	July	2008	3	Collembola	1	127.324	Collembola	Insect, Arachnid, Collembola	tiny
Reference	12	2008-07-08	July	2008	3	Chironomidae adult	1	127.324	Insect adult	Insect, Arachnid, Collembola
Reference	12	2008-07-08	July	2008	3	Talitridae, juv.	212	26992.6	Terrestrial Amphipod	Terrestrial amphipod/isopod
Reference	12	2008-07-08	July	2008	3	Acari	1	127.324	Arachnid	Insect, Arachnid, Collembola
Reference	12	2008-07-08	July	2008	3	Oligochaeta	48	6111.54	Oligochaeta	Oligochaeta
Reference	12	2008-07-08	July	2008	3	Nematoda	8	1018.59	Nematoda	Nematoda
Reference	12	2008-07-08	July	2008	3	Capitellidae	2	254.647	Capitellidae	Polychaete
Reference	12	2008-07-08	July	2008	3	Traskorchestia traskiana	19	2419.15	Terrestrial Amphipod	Terrestrial amphipod/isopod
Reference	12	2008-07-08	July	2008	3	Traskorchestia georgiana	9	1145.91	Terrestrial Amphipod	Terrestrial amphipod/isopod
Reference	12	2008-07-08	July	2008	3	Coleoptera larvae	1	127.324	Insect larvae	Insect, Arachnid, Collembola
Reference	12	2008-07-08	July	2008	4	Talitridae, juv.	716	91163.7	Terrestrial Amphipod	Terrestrial amphipod/isopod
Reference	12	2008-07-08	July	2008	4	Oligochaeta	58	7384.77	Oligochaeta	Oligochaeta
Reference	12	2008-07-08	July	2008	4	Capitellidae	2	254.647	Capitellidae	Polychaete
Reference	12	2008-07-08	July	2008	4	Acari	1	127.324	Arachnid	Insect, Arachnid, Collembola
Reference	12	2008-07-08	July	2008	4	Gnorimosphaeroma oregonense	1	127.324	Aquatic Isopod	Aquatic crustacean
Reference	12	2008-07-08	July	2008	4	Nereidae	1	127.324	Nereidae	Polychaete	Reference dish #15
Reference	12	2008-07-08	July	2008	4	Traskorchestia traskiana	124	15788.1	Terrestrial Amphipod	Terrestrial amphipod/isopod
Reference	12	2008-07-08	July	2008	4	Traskorchestia georgiana	62	7894.07	Terrestrial Amphipod	Terrestrial amphipod/isopod
Reference	12	2008-07-08	July	2008	6	Talitridae, juv.	221	28138.5	Terrestrial Amphipod	Terrestrial amphipod/isopod
Reference	12	2008-07-08	July	2008	6	Acari	1	127.324	Arachnid	Insect, Arachnid, Collembola
Reference	12	2008-07-08	July	2008	6	Bivalve, juv.	1	127.324	Bivalve	Mollusk
Reference	12	2008-07-08	July	2008	6	Oligochaeta	40	5092.95	Oligochaeta	Oligochaeta
Reference	12	2008-07-08	July	2008	6	Traskorchestia traskiana	26	3310.42	Terrestrial Amphipod	Terrestrial amphipod/isopod
Reference	12	2008-07-08	July	2008	6	Traskorchestia georgiana	1	127.324	Terrestrial Amphipod	Terrestrial amphipod/isopod
Reference	12	2008-07-08	July	2008	7	Mussel, juv.	2	254.647	Bivalve	Mollusk
Reference	12	2008-07-08	July	2008	7	Acari	8	1018.59	Arachnid	Insect, Arachnid, Collembola
Reference	12	2008-07-08	July	2008	7	Talitridae, juv.	704	89635.9	Terrestrial Amphipod	Terrestrial amphipod/isopod
Reference	12	2008-07-08	July	2008	7	Oligochaeta	215	27374.6	Oligochaeta	Oligochaeta
Reference	12	2008-07-08	July	2008	7	Traskorchestia traskiana	12	1527.88	Terrestrial Amphipod	Terrestrial amphipod/isopod
Reference	12	2008-07-08	July	2008	7	Traskorchestia georgiana	3	381.971	Terrestrial Amphipod	Terrestrial amphipod/isopod
Restored 2005	5	2008-07-08	July	2008	1	Gnorimosphaeroma oregonense	3	381.971	Aquatic Isopod	Aquatic crustacean
Restored 2005	5	2008-07-08	July	2008	1	Exosphaeroma inornata	22	2801.12	Aquatic Isopod	Aquatic crustacean
Restored 2005	5	2008-07-08	July	2008	1	Oligochaeta	5	636.618	Oligochaeta	Oligochaeta
Restored 2005	5	2008-07-08	July	2008	1	Nematoda	3	381.971	Nematoda	Nematoda
Restored 2005	5	2008-07-08	July	2008	1	Turbellaria	1	127.324	Turbellaria	Nemertea/Turbellaria
Restored 2005	5	2008-07-08	July	2008	1	Nemertea	1	127.324	Nemertea	Nemertea/Turbellaria
Restored 2005	5	2008-07-08	July	2008	1	Hemipodia simplex	6	763.942	Glyceridae	Polychaete
Restored 2005	5	2008-07-08	July	2008	2	Gnorimosphaeroma oregonense	2	254.647	Aquatic Isopod	Aquatic crustacean
Restored 2005	5	2008-07-08	July	2008	2	Exosphaeroma inornata	1	127.324	Aquatic Isopod	Aquatic crustacean
Restored 2005	5	2008-07-08	July	2008	2	Nematoda	7	891.266	Nematoda	Nematoda
Restored 2005	5	2008-07-08	July	2008	2	Spionidae	1	127.324	Spionidae	Polychaete	juv.
Restored 2005	5	2008-07-08	July	2008	2	Hemipodia simplex	3	381.971	Glyceridae	Polychaete
Restored 2005	5	2008-07-08	July	2008	2	Nemertea	2	254.647	Nemertea	Nemertea/Turbellaria
Restored 2005	5	2008-07-08	July	2008	2	Allorchestes sp.	1	127.324	Aquatic Amphipod	Aquatic crustacean
Restored 2005	5	2008-07-08	July	2008	2	Mytilus edulis	1	127.324	Bivalve	Mollusk
Restored 2005	5	2008-07-08	July	2008	3	Nematoda	7	891.266	Nematoda	Nematoda
Restored 2005	5	2008-07-08	July	2008	3	Bivalve, juv.	2	254.647	Bivalve	Mollusk
Restored 2005	5	2008-07-08	July	2008	3	Turbellaria	5	636.618	Turbellaria	Nemertea/Turbellaria
Restored 2005	5	2008-07-08	July	2008	3	Oligochaeta	1	127.324	Oligochaeta	Oligochaeta
Restored 2005	5	2008-07-08	July	2008	3	Protodriloides chaetifer	1	127.324	Archiannelida	Polychaete
Restored 2005	5	2008-07-08	July	2008	3	Nemertea	2	254.647	Nemertea	Nemertea/Turbellaria
Restored 2005	5	2008-07-08	July	2008	3	Mytilus edulis	3	381.971	Bivalve	Mollusk
Restored 2005	5	2008-07-08	July	2008	3	Hemipodia simplex	12	1527.88	Glyceridae	Polychaete
Restored 2005	5	2008-07-08	July	2008	4	Hemipodia simplex	2	254.647	Glyceridae	Polychaete
Restored 2005	5	2008-07-08	July	2008	4	Nematoda	6	763.942	Nematoda	Nematoda
Restored 2005	5	2008-07-08	July	2008	4	Turbellaria	3	381.971	Turbellaria	Nemertea/Turbellaria
Restored 2005	5	2008-07-08	July	2008	4	Nemertea	1	127.324	Nemertea	Nemertea/Turbellaria
Restored 2005	5	2008-07-08	July	2008	4	Nereidae	1	127.324	Nereidae	Polychaete	juv.
Restored 2005	5	2008-07-08	July	2008	4	Syllis elongata	1	127.324	Syllidae	Polychaete
Restored 2005	5	2008-07-08	July	2008	4	Gastropoda	1	127.324	Gastropod	Mollusk
Restored 2005	5	2008-07-08	July	2008	4	Mytilus edulis	3	381.971	Bivalve	Mollusk
Restored 2005	5	2008-07-08	July	2008	4	Ostracoda	1	127.324	Ostracoda	Aquatic crustacean
Restored 2005	5	2008-07-08	July	2008	5	Mytilus edulis	2	254.647	Bivalve	Mollusk
Restored 2005	5	2008-07-08	July	2008	5	Gnorimosphaeroma oregonense	5	636.618	Aquatic Isopod	Aquatic crustacean
Restored 2005	5	2008-07-08	July	2008	5	Bivalve, juv.	2	254.647	Bivalve	Mollusk
Restored 2005	5	2008-07-08	July	2008	5	Exosphaeroma sp.	1	127.324	Aquatic Isopod	Aquatic crustacean
Restored 2005	5	2008-07-08	July	2008	5	Gastropoda	1	127.324	Gastropod	Mollusk
Restored 2005	5	2008-07-08	July	2008	5	Nematoda	1	127.324	Nematoda	Nematoda
Restored 2005	5	2008-07-08	July	2008	5	Nemertea	2	254.647	Nemertea	Nemertea/Turbellaria
Restored 2005	5	2008-07-08	July	2008	6	Mussel, juv.	1	127.324	Bivalve	Mollusk
Restored 2005	5	2008-07-08	July	2008	6	Mytilus edulis	2	254.647	Bivalve	Mollusk
Restored 2005	5	2008-07-08	July	2008	6	Ostracoda	1	127.324	Ostracoda	Aquatic crustacean
Restored 2005	5	2008-07-08	July	2008	6	Hemipodia simplex	25	3183.09	Glyceridae	Polychaete
Restored 2005	5	2008-07-08	July	2008	6	Gastropoda	1	127.324	Gastropod	Mollusk
Restored 2005	5	2008-07-08	July	2008	6	Laophontidae	1	127.324	Harpacticoid	Aquatic crustacean
Restored 2005	5	2008-07-08	July	2008	6	Nematoda	3	381.971	Nematoda	Nematoda
Restored 2005	5	2008-07-08	July	2008	6	Nemertea	1	127.324	Nemertea	Nemertea/Turbellaria
Restored 2005	5	2008-07-08	July	2008	6	Turbellaria	1	127.324	Turbellaria	Nemertea/Turbellaria
Restored 2005	5	2008-07-08	July	2008	6	Exosphaeroma sp.	1	127.324	Aquatic Isopod	Aquatic crustacean
Restored 2005	5	2008-07-08	July	2008	7	Mytilus edulis	5	636.618	Bivalve	Mollusk
Restored 2005	5	2008-07-08	July	2008	7	Nematoda	1	127.324	Nematoda	Nematoda
Restored 2005	5	2008-07-08	July	2008	7	Huntemannia jadensis	1	127.324	Harpacticoid	Aquatic crustacean
Restored 2005	5	2008-07-08	July	2008	7	Idotea wosnesenskii	1	127.324	Aquatic Isopod	Aquatic crustacean
Restored 2005	5	2008-07-08	July	2008	7	Gnorimosphaeroma oregonense	2	254.647	Aquatic Isopod	Aquatic crustacean
Restored 2005	5	2008-07-08	July	2008	7	Hemipodia simplex	1	127.324	Glyceridae	Polychaete
Restored 2005	5	2008-07-08	July	2008	7	Armandia brevis	1	127.324	Opheliidae	Polychaete
Restored 2005	5	2008-07-08	July	2008	7	Eogammarus confervicolus	12	1527.88	Aquatic Amphipod	Aquatic crustacean
Restored 2005	5	2008-07-08	July	2008	7	Gastropoda	1	127.324	Gastropod	Mollusk
Restored 2005	8	2008-07-08	July	2008	1	Oligochaeta	70	8912.66	Oligochaeta	Oligochaeta
Restored 2005	8	2008-07-08	July	2008	1	Nematoda	23	2928.44	Nematoda	Nematoda
Restored 2005	8	2008-07-08	July	2008	1	Ostracoda	4	509.295	Ostracoda	Aquatic crustacean
Restored 2005	8	2008-07-08	July	2008	1	Hypogastruridae	1	127.324	Collembola	Insect, Arachnid, Collembola
Restored 2005	8	2008-07-08	July	2008	1	Spionidae	2	254.647	Spionidae	Polychaete
Restored 2005	8	2008-07-08	July	2008	1	Coleoptera	1	127.324	Insect adult	Insect, Arachnid, Collembola
Restored 2005	8	2008-07-08	July	2008	1	Hemipodia simplex	2	254.647	Glyceridae	Polychaete
Restored 2005	8	2008-07-08	July	2008	1	Protodriloides chaetifer	1	127.324	Archiannelida	Polychaete
Restored 2005	8	2008-07-08	July	2008	2	Oligochaeta	17	2164.5	Oligochaeta	Oligochaeta
Restored 2005	8	2008-07-08	July	2008	2	Nematoda	6	763.942	Nematoda	Nematoda
Restored 2005	8	2008-07-08	July	2008	2	Protodriloides chaetifer	1	127.324	Archiannelida	Polychaete
Restored 2005	8	2008-07-08	July	2008	2	Mussel, juv.	1	127.324	Bivalve	Mollusk
Restored 2005	8	2008-07-08	July	2008	2	Talitridae, juv.	1	127.324	Terrestrial Amphipod	Terrestrial amphipod/isopod
Restored 2005	8	2008-07-08	July	2008	2	Spionidae	1	127.324	Spionidae	Polychaete	juv.
Restored 2005	8	2008-07-08	July	2008	3	Mussel, juv.	2	254.647	Bivalve	Mollusk
Restored 2005	8	2008-07-08	July	2008	3	Protodriloides chaetifer	3	381.971	Archiannelida	Polychaete
Restored 2005	8	2008-07-08	July	2008	3	Hesionidae, juv.	1	127.324	Hesionidae	Polychaete
Restored 2005	8	2008-07-08	July	2008	3	Oligochaeta	15	1909.85	Oligochaeta	Oligochaeta
Restored 2005	8	2008-07-08	July	2008	3	Nematoda	7	891.266	Nematoda	Nematoda
Restored 2005	8	2008-07-08	July	2008	4	Ostracoda	1	127.324	Ostracoda	Aquatic crustacean
Restored 2005	8	2008-07-08	July	2008	4	Nereidae	1	127.324	Nereidae	Polychaete	Reference 7
Restored 2005	8	2008-07-08	July	2008	4	Oligochaeta	33	4201.68	Oligochaeta	Oligochaeta
Restored 2005	8	2008-07-08	July	2008	4	Nematoda	9	1145.91	Nematoda	Nematoda
Restored 2005	8	2008-07-08	July	2008	4	Protodriloides chaetifer	1	127.324	Archiannelida	Polychaete
Restored 2005	8	2008-07-08	July	2008	5	Oligochaeta	31	3947.03	Oligochaeta	Oligochaeta
Restored 2005	8	2008-07-08	July	2008	5	Nematoda	8	1018.59	Nematoda	Nematoda
Restored 2005	8	2008-07-08	July	2008	5	Bivalve, juv.	1	127.324	Bivalve	Mollusk
Restored 2005	8	2008-07-08	July	2008	5	Hemipodia simplex	1	127.324	Glyceridae	Polychaete
Restored 2005	8	2008-07-08	July	2008	6	Mytilus edulis	1	127.324	Bivalve	Mollusk
Restored 2005	8	2008-07-08	July	2008	6	Oligochaeta	11	1400.56	Oligochaeta	Oligochaeta
Restored 2005	8	2008-07-08	July	2008	6	Nematoda	4	509.295	Nematoda	Nematoda
Restored 2005	8	2008-07-08	July	2008	6	Protodriloides chaetifer	3	381.971	Archiannelida	Polychaete
Restored 2005	8	2008-07-08	July	2008	6	Bivalve, juv.	1	127.324	Bivalve	Mollusk
Restored 2005	8	2008-07-08	July	2008	6	Pygospio elegans	1	127.324	Spionidae	Polychaete
Restored 2005	8	2008-07-08	July	2008	7	Oligochaeta	65	8276.04	Oligochaeta	Oligochaeta
Restored 2005	8	2008-07-08	July	2008	7	Nematoda	3	381.971	Nematoda	Nematoda
Restored 2005	8	2008-07-08	July	2008	7	Protodriloides chaetifer	1	127.324	Archiannelida	Polychaete
Restored 2005	8	2008-07-08	July	2008	7	Pygospio elegans	1	127.324	Spionidae	Polychaete
Restored 2005	12	2008-07-08	July	2008	1	Talitridae, juv.	60	7639.42	Terrestrial Amphipod	Terrestrial amphipod/isopod	Lots of algae in these samples
Restored 2005	12	2008-07-08	July	2008	1	Oligochaeta	12	1527.88	Oligochaeta	Oligochaeta
Restored 2005	12	2008-07-08	July	2008	1	Acari	6	763.942	Arachnid	Insect, Arachnid, Collembola
Restored 2005	12	2008-07-08	July	2008	1	Nematoda	2	254.647	Nematoda	Nematoda
Restored 2005	12	2008-07-08	July	2008	1	Staphylinidae	2	254.647	Insect adult	Insect, Arachnid, Collembola
Restored 2005	12	2008-07-08	July	2008	1	Coleoptera larvae	2	254.647	Insect larvae	Insect, Arachnid, Collembola
Restored 2005	12	2008-07-08	July	2008	1	Detonella papillicornis	2	254.647	Terrestrial Isopod	Terrestrial amphipod/isopod
Restored 2005	12	2008-07-08	July	2008	1	Traskorchestia traskiana	47	5984.21	Terrestrial Amphipod	Terrestrial amphipod/isopod
Restored 2005	12	2008-07-08	July	2008	1	Traskorchestia georgiana	11	1400.56	Terrestrial Amphipod	Terrestrial amphipod/isopod
Restored 2005	12	2008-07-08	July	2008	2	Talitridae, juv.	116	14769.5	Terrestrial Amphipod	Terrestrial amphipod/isopod
Restored 2005	12	2008-07-08	July	2008	2	Oligochaeta	9	1145.91	Oligochaeta	Oligochaeta
Restored 2005	12	2008-07-08	July	2008	2	Acari	1	127.324	Arachnid	Insect, Arachnid, Collembola
Restored 2005	12	2008-07-08	July	2008	2	Cumella vulgaris	2	254.647	Cumacea	Aquatic crustacean
Restored 2005	12	2008-07-08	July	2008	2	Valvifera, juv.	1	127.324	Aquatic Isopod	Aquatic crustacean
Restored 2005	12	2008-07-08	July	2008	2	Empididae larvae	1	127.324	Insect larvae	Insect, Arachnid, Collembola
Restored 2005	12	2008-07-08	July	2008	2	Chironomidae adult	1	127.324	Insect adult	Insect, Arachnid, Collembola
Restored 2005	12	2008-07-08	July	2008	2	Traskorchestia traskiana	46	5856.89	Terrestrial Amphipod	Terrestrial amphipod/isopod
Restored 2005	12	2008-07-08	July	2008	2	Traskorchestia georgiana	16	2037.18	Terrestrial Amphipod	Terrestrial amphipod/isopod
Restored 2005	12	2008-07-08	July	2008	2	Insect pupae	1	127.324	Insect larvae	Insect, Arachnid, Collembola
Restored 2005	12	2008-07-08	July	2008	2	Empididae adult	1	127.324	Insect adult	Insect, Arachnid, Collembola
Restored 2005	12	2008-07-08	July	2008	2	Hydrophilidae	1	127.324	Insect adult	Insect, Arachnid, Collembola	coleoptera
Restored 2005	12	2008-07-08	July	2008	3	Talitridae, juv.	97	12350.4	Terrestrial Amphipod	Terrestrial amphipod/isopod
Restored 2005	12	2008-07-08	July	2008	3	Oligochaeta	73	9294.63	Oligochaeta	Oligochaeta
Restored 2005	12	2008-07-08	July	2008	3	Coleoptera larvae	1	127.324	Insect larvae	Insect, Arachnid, Collembola
Restored 2005	12	2008-07-08	July	2008	3	Staphylinidae	1	127.324	Insect adult	Insect, Arachnid, Collembola
Restored 2005	12	2008-07-08	July	2008	3	Acari	3	381.971	Arachnid	Insect, Arachnid, Collembola
Restored 2005	12	2008-07-08	July	2008	3	Sternorrhyncha	1	127.324	Insect adult	Insect, Arachnid, Collembola
Restored 2005	12	2008-07-08	July	2008	3	Traskorchestia traskiana	41	5220.27	Terrestrial Amphipod	Terrestrial amphipod/isopod
Restored 2005	12	2008-07-08	July	2008	3	Traskorchestia georgiana	9	1145.91	Terrestrial Amphipod	Terrestrial amphipod/isopod
Restored 2005	12	2008-07-08	July	2008	4	Oligochaeta	22	2801.12	Oligochaeta	Oligochaeta
Restored 2005	12	2008-07-08	July	2008	4	Nematoda	1	127.324	Nematoda	Nematoda
Restored 2005	12	2008-07-08	July	2008	4	Traskorchestia traskiana	2	254.647	Terrestrial Amphipod	Terrestrial amphipod/isopod
Restored 2005	12	2008-07-08	July	2008	4	Traskorchestia georgiana	3	381.971	Terrestrial Amphipod	Terrestrial amphipod/isopod
Restored 2005	12	2008-07-08	July	2008	4	Talitridae, juv.	11	1400.56	Terrestrial Amphipod	Terrestrial amphipod/isopod
Restored 2005	12	2008-07-08	July	2008	4	Acari	1	127.324	Arachnid	Insect, Arachnid, Collembola
Restored 2005	12	2008-07-08	July	2008	5	Coccinellidae	1	127.324	Insect adult	Insect, Arachnid, Collembola
Restored 2005	12	2008-07-08	July	2008	5	Mussel, juv.	2	254.647	Bivalve	Mollusk
Restored 2005	12	2008-07-08	July	2008	5	Talitridae, juv.	163	20753.8	Terrestrial Amphipod	Terrestrial amphipod/isopod
Restored 2005	12	2008-07-08	July	2008	5	Oligochaeta	37	4710.98	Oligochaeta	Oligochaeta
Restored 2005	12	2008-07-08	July	2008	5	Chironomidae adult	1	127.324	Insect adult	Insect, Arachnid, Collembola
Restored 2005	12	2008-07-08	July	2008	5	Coleoptera larvae	1	127.324	Insect larvae	Insect, Arachnid, Collembola
Restored 2005	12	2008-07-08	July	2008	5	Insect pupae	1	127.324	Insect larvae	Insect, Arachnid, Collembola
Restored 2005	12	2008-07-08	July	2008	5	Empididae larvae	1	127.324	Insect larvae	Insect, Arachnid, Collembola
Restored 2005	12	2008-07-08	July	2008	5	Traskorchestia traskiana	13	1655.21	Terrestrial Amphipod	Terrestrial amphipod/isopod
Restored 2005	12	2008-07-08	July	2008	5	Megalorchestia pugettensis	3	381.971	Terrestrial Amphipod	Terrestrial amphipod/isopod
Restored 2005	12	2008-07-08	July	2008	5	Traskorchestia georgiana	4	509.295	Terrestrial Amphipod	Terrestrial amphipod/isopod
Restored 2005	12	2008-07-08	July	2008	5	Acari	2	254.647	Arachnid	Insect, Arachnid, Collembola
Restored 2005	12	2008-07-08	July	2008	6	Talitridae, juv.	363	46218.5	Terrestrial Amphipod	Terrestrial amphipod/isopod
Restored 2005	12	2008-07-08	July	2008	6	Oligochaeta	10	1273.24	Oligochaeta	Oligochaeta
Restored 2005	12	2008-07-08	July	2008	6	Staphylinidae	1	127.324	Insect adult	Insect, Arachnid, Collembola
Restored 2005	12	2008-07-08	July	2008	6	Traskorchestia traskiana	24	3055.77	Terrestrial Amphipod	Terrestrial amphipod/isopod
Restored 2005	12	2008-07-08	July	2008	6	Traskorchestia georgiana	4	509.295	Terrestrial Amphipod	Terrestrial amphipod/isopod
Restored 2005	12	2008-07-08	July	2008	7	Talitridae, juv.	71	9039.98	Terrestrial Amphipod	Terrestrial amphipod/isopod
Restored 2005	12	2008-07-08	July	2008	7	Oligochaeta	14	1782.53	Oligochaeta	Oligochaeta
Restored 2005	12	2008-07-08	July	2008	7	Nereidae	1	127.324	Nereidae	Polychaete	juv.
Restored 2005	12	2008-07-08	July	2008	7	Insect pupae	2	254.647	Insect larvae	Insect, Arachnid, Collembola
Restored 2005	12	2008-07-08	July	2008	7	Staphylinidae	1	127.324	Insect adult	Insect, Arachnid, Collembola
Restored 2005	12	2008-07-08	July	2008	7	Traskorchestia traskiana	11	1400.56	Terrestrial Amphipod	Terrestrial amphipod/isopod
Restored 2005	12	2008-07-08	July	2008	7	Traskorchestia georgiana	7	891.266	Terrestrial Amphipod	Terrestrial amphipod/isopod
Reference	5	2008-09-16	September	2008	1	Oligochaeta	24	3055.77	Oligochaeta	Oligochaeta
Reference	5	2008-09-16	September	2008	1	Nematoda	1	127.324	Nematoda	Nematoda
Reference	5	2008-09-16	September	2008	1	Gnorimosphaeroma oregonense	7	891.266	Aquatic Isopod	Aquatic crustacean
Reference	5	2008-09-16	September	2008	1	Exosphaeroma inornata	2	254.647	Aquatic Isopod	Aquatic crustacean
Reference	5	2008-09-16	September	2008	1	Protodriloides chaetifer	1	127.324	Archiannelida	Polychaete
Reference	5	2008-09-16	September	2008	1	Eogammarus confervicolus	6	763.942	Aquatic Amphipod	Aquatic crustacean
Reference	5	2008-09-16	September	2008	1	Allorchestes sp.	11	1400.56	Aquatic Amphipod	Aquatic crustacean
Reference	5	2008-09-16	September	2008	1	Gastropoda	1	127.324	Gastropod	Mollusk
Reference	5	2008-09-16	September	2008	2	Oligochaeta	51	6493.51	Oligochaeta	Oligochaeta
Reference	5	2008-09-16	September	2008	2	Nematoda	1	127.324	Nematoda	Nematoda
Reference	5	2008-09-16	September	2008	2	Exosphaeroma sp.	1	127.324	Aquatic Isopod	Aquatic crustacean
Reference	5	2008-09-16	September	2008	2	Exosphaeroma inornata	3	381.971	Aquatic Isopod	Aquatic crustacean
Reference	5	2008-09-16	September	2008	2	Allorchestes sp.	10	1273.24	Aquatic Amphipod	Aquatic crustacean
Reference	5	2008-09-16	September	2008	2	Eogammarus confervicolus	32	4074.36	Aquatic Amphipod	Aquatic crustacean
Reference	5	2008-09-16	September	2008	3	Exosphaeroma inornata	5	636.618	Aquatic Isopod	Aquatic crustacean
Reference	5	2008-09-16	September	2008	3	Gnorimosphaeroma oregonense	1	127.324	Aquatic Isopod	Aquatic crustacean
Reference	5	2008-09-16	September	2008	3	Oligochaeta	29	3692.39	Oligochaeta	Oligochaeta
Reference	5	2008-09-16	September	2008	3	Nematoda	2	254.647	Nematoda	Nematoda
Reference	5	2008-09-16	September	2008	3	Allorchestes sp.	14	1782.53	Aquatic Amphipod	Aquatic crustacean
Reference	5	2008-09-16	September	2008	3	Eogammarus confervicolus	14	1782.53	Aquatic Amphipod	Aquatic crustacean
Reference	5	2008-09-16	September	2008	4	Exosphaeroma inornata	32	4074.36	Aquatic Isopod	Aquatic crustacean
Reference	5	2008-09-16	September	2008	4	Gnorimosphaeroma oregonense	3	381.971	Aquatic Isopod	Aquatic crustacean
Reference	5	2008-09-16	September	2008	4	Eogammarus confervicolus	2	254.647	Aquatic Amphipod	Aquatic crustacean
Reference	5	2008-09-16	September	2008	4	Allorchestes sp.	25	3183.09	Aquatic Amphipod	Aquatic crustacean
Reference	5	2008-09-16	September	2008	4	Turbellaria	11	1400.56	Turbellaria	Nemertea/Turbellaria
Reference	5	2008-09-16	September	2008	5	Gnorimosphaeroma insulare	1	127.324	Aquatic Isopod	Aquatic crustacean
[truncated: 3,512 more rows]

## Sheet: vlook
Taxa	Taxa Coarse	Taxa Grouping
Acari	Arachnid	Insect, Arachnid, Collembola
Allorchestes sp.	Aquatic Amphipod	Aquatic crustacean
Alvania compacta	Gastropod	Mollusk
Americorophium sp.	Aquatic Amphipod	Aquatic crustacean
Amonardia perturbata	Harpacticoid	Aquatic crustacean
Amphiascus cinctus	Harpacticoid	Aquatic crustacean
Amphipod, juv.	Aquatic Amphipod	Aquatic crustacean
Anthozoa	Anthozoa	Anthozoa
Aphididae	Insect adult	Insect, Arachnid, Collembola
Araneae	Arachnid	Insect, Arachnid, Collembola
Archiannelida	Archiannelida	Polychaete
Armandia brevis	Opheliidae	Polychaete
Bivalve, juv.	Bivalve	Mollusk
Boccardia sp.	Spionidae	Polychaete
Brachycera, pupa	Insect larvae	Insect, Arachnid, Collembola
Brachyura, adult	Crab	Aquatic crustacean
Brachyura, megalopa	Crab	Aquatic crustacean
Calliopius sp., juv.	Aquatic Amphipod	Aquatic crustacean
Calliopius pacificus	Aquatic Amphipod	Aquatic crustacean
Calliphoridae larvae	Insect larvae	Insect, Arachnid, Collembola
Capitellidae	Capitellidae	Polychaete
Caprella kennerlyi	Aquatic Amphipod	Aquatic crustacean
Carabidae	Insect adult	Insect, Arachnid, Collembola
Cardiidae, juv.	Crangonidae	Mollusk
Ceratopogonidae larvae	Insect larvae	Insect, Arachnid, Collembola
Chironomidae adult	Insect adult	Insect, Arachnid, Collembola
Chironomidae larvae	Insect larvae	Insect, Arachnid, Collembola
Chironomidae pupae	Insect larvae	Insect, Arachnid, Collembola
Cicadellidae	Insect adult	Insect, Arachnid, Collembola
Clam, juv.	Bivalve	Mollusk
Coccinellidae	Insect adult	Insect, Arachnid, Collembola
Coelopa sp, larva	Insect larvae	Insect, Arachnid, Collembola
Coelopa sp, pupa	Insect larvae	Insect, Arachnid, Collembola
Coelopidae, larva	Insect larvae	Insect, Arachnid, Collembola
Coleoptera	Insect adult	Insect, Arachnid, Collembola
Coleoptera larvae	Insect larvae	Insect, Arachnid, Collembola
Coleoptera, pupa	Insect larvae	Insect, Arachnid, Collembola
Collembola	Collembola	Insect, Arachnid, Collembola
Corophiidae juv.	Aquatic Amphipod	Aquatic crustacean
Crangonidae, juv.	Crangonidae	Aquatic crustacean
Cumella vulgaris	Cumacea	Aquatic crustacean
Cyclopoid	Cyclopoid	Aquatic crustacean
Dendraster excentricus, juv.	Dendrasteridae	Echinodermata
Detonella papillicornis	Terrestrial Isopod	Terrestrial amphipod/isopod
Diosacchus spinatus	Harpacticoid	Aquatic crustacean
Diptera	Insect adult	Insect, Arachnid, Collembola
Diptera larvae	Insect larvae	Insect, Arachnid, Collembola
Diptera pupae	Insect larvae	Insect, Arachnid, Collembola
Dolichopodidae	Insect adult	Insect, Arachnid, Collembola
Echinoidea	Echinoidea	Echinoidea
Ectinosomatidae	Harpacticoid	Aquatic crustacean
Empididae adult	Insect adult	Insect, Arachnid, Collembola
Empididae larvae	Insect larvae	Insect, Arachnid, Collembola
Eogammarus confervicolus	Aquatic Amphipod	Aquatic crustacean
Ephydridae adult	Insect adult	Insect, Arachnid, Collembola
Ephydridae larvae	Insect larvae	Insect, Arachnid, Collembola
Ephydridae, pupa	Insect larvae	Insect, Arachnid, Collembola
Epicaridea	Aquatic Isopod	Aquatic crustacean
Eteone californica	Phyllodocidae	Polychaete
Eteone sp.	Phyllodocidae	Polychaete
Eulalia sp.	Phyllodocidae	Polychaete
Euphausiacea zoea	Euphausiacea	Aquatic crustacean
Eurycercus sp	Cladocera	Aquatic crustacean
Exosphaeroma amplicauda	Aquatic Isopod	Aquatic crustacean
Exosphaeroma inornata	Aquatic Isopod	Aquatic crustacean
Exosphaeroma sp.	Aquatic Isopod	Aquatic crustacean
Fish,egg	Fish	Fish
Foraminifera	Foraminifera	Foraminifera
Formicidae	Insect adult	Insect, Arachnid, Collembola
Gammaridea	Aquatic Amphipod	Aquatic crustacean
Gastropod, juv.	Gastropod	Mollusk
Gastropoda	Gastropod	Mollusk
Glyceridae	Glyceridae	Polychaete
Gnorimosphaeroma insulare	Aquatic Isopod	Aquatic crustacean
Gnorimosphaeroma oregonense	Aquatic Isopod	Aquatic crustacean
Gnorimosphaeroma, juv.	Aquatic Isopod	Aquatic crustacean
Goniada sp.	Goniadidae	Polychaete
Goniadidae	Goniadidae	Polychaete
Goniadidae, juv.	Goniadidae	Polychaete
Grandidierella japonica	Aquatic Amphipod	Aquatic crustacean
Harpacticoid	Harpacticoid	Aquatic crustacean
Harpacticoid copepodid	Harpacticoid	Aquatic crustacean
Harpacticus sp.	Harpacticoid	Aquatic crustacean
Harpacticus sp. A	Harpacticoid	Aquatic crustacean
Hemigrapsus oregonensis	Crab	Aquatic crustacean
Hemigrapsus sp	Crab	Aquatic crustacean
Hemipodia simplex	Glyceridae	Polychaete
Hemiptera	Insect adult	Insect, Arachnid, Collembola
Hesionidae	Hesionidae	Polychaete
Hesionidae, juv.	Hesionidae	Polychaete
Heterolaophonte hamondi	Harpacticoid	Aquatic crustacean
Heterolaophonte longisetigera	Harpacticoid	Aquatic crustacean
Huntemannia jadensis	Harpacticoid	Aquatic crustacean
Hydrozoa	Hydrozoa	Hydrozoa
Hymenoptera	Insect adult	Insect, Arachnid, Collembola
Hydrophilidae	Insect adult	Insect, Arachnid, Collembola
Hypogastruridae	Collembola	Insect, Arachnid, Collembola
Ichneumonidae	Insect adult	Insect, Arachnid, Collembola
Idotea sp.	Aquatic Isopod	Aquatic crustacean
Idotea wosnesenskii	Aquatic Isopod	Aquatic crustacean
Insect pupae	Insect larvae	Insect, Arachnid, Collembola
Isopod, juv.	Aquatic Isopod	Aquatic crustacean
Isotomidae	Collembola	Insect, Arachnid, Collembola
Jassa spp.	Aquatic Amphipod	Aquatic crustacean
Laophontidae	Harpacticoid	Aquatic crustacean
Leptastacidae	Harpacticoid	Aquatic crustacean
Leptochelia dubia	Tanaidacea	Aquatic crustacean
Leptochelia savignyi	Tanaidacea	Aquatic crustacean
Littorina scutulata	Gastropod	Mollusk
Littorina scutulata eggcase	Gastropod	Mollusk
Lottiidae	Gastropod	Mollusk
Megalorchestia pugettensis	Terrestrial Amphipod	Terrestrial amphipod/isopod
Micropodarke dubia	Hesionidae	Polychaete
Monocorophium acherusicum	Aquatic Amphipod	Aquatic crustacean
Monocorophium sp	Aquatic Amphipod	Aquatic crustacean
Monocorophium sp., juv.	Aquatic Amphipod	Aquatic crustacean
Muscidae larvae	Insect larvae	Insect, Arachnid, Collembola
Mussel, juv.	Bivalve	Mollusk
Mysida	Mysida	Aquatic crustacean
Mytilus edulis	Bivalve	Mollusk
Mytilus sp	Bivalve	Mollusk
Neanthes limnicola	Nereidae	Polychaete
Nematoda	Nematoda	Nematoda
Nemertea	Nemertea	Nemertea/Turbellaria
Nemertea/Turbellaria	Nemertea	Nemertea/Turbellaria
Nereidae	Nereidae	Polychaete
Nereidae, juv.	Nereidae	Polychaete
Nereis sp	Nereidae	Polychaete
Nereis vexillosa	Nereidae	Polychaete
Nerilla sp.	Archiannelida	Polychaete
Nitokra sp.	Harpacticoid	Aquatic crustacean
not preserved	not preserved	not preserved
Oligochaeta	Oligochaeta	Oligochaeta
Oligochaete eggcase	Oligochaeta	Oligochaeta
Oniscoidea, juv.	Terrestrial Isopod	Terrestrial amphipod/isopod
Onychiuridae	Collembola	Insect, Arachnid, Collembola
Ophiodromus pugettensis	Hesionidae	Polychaete
Orbiniidae, juv.	Orbiniidae	Polychaete
Orthopsyllus sp	Harpacticoid	Aquatic crustacean
Ostracoda	Ostracoda	Aquatic crustacean
Paguridae, megalopa	Crab	Aquatic crustacean
Paleanotus bellis	Chrysopetalidae	Polychaete
Paleanotus occidentale	Chrysopetalidae	Polychaete
Paralaophonte sp.	Harpacticoid	Aquatic crustacean
Paramoera sp.	Aquatic Amphipod	Aquatic crustacean
Parathalestris californica	Harpacticoid	Aquatic crustacean
Patellogastropoda	Gastropod	Mollusk
Phoronida	Phoronida	Phoronida
Photis sp.	Aquatic Amphipod	Aquatic crustacean
Phyllodoce longipes	Phyllodocidae	Polychaete
Phyllodoce sp.	Phyllodocidae	Polychaete
Phyllodocidae	Phyllodocidae	Polychaete
Phyllodocidae, juvenile	Phyllodocidae	Polychaete
Pilargidae	Pilargidae	Polychaete
Pisionidae	Pisionidae	Polychaete
Platynereis bicanaliculata	Nereidae	Polychaete
Polychaete	Polychaete, unk.	Polychaete
Polychaete, juv.	Polychaete, unk.	Polychaete
Polynoidae	Polynoidae	Polychaete
Pontogeneiidae	Aquatic Amphipod	Aquatic crustacean
Porcellidium	Harpacticoid	Aquatic crustacean
Protodriloides chaetifer	Archiannelida	Polychaete
Pseudopolydora kempi	Spionidae	Polychaete
Pseudopolydora sp	Spionidae	Polychaete
Psocoptera	Insect adult	Insect, Arachnid, Collembola
Pygospio elegans	Spionidae	Polychaete
Pygospio sp.	Spionidae	Polychaete
Rhynchospio gluteae	Spionidae	Polychaete
Rochefortia tumida	Bivalve	Mollusk
Sabellidae	Sabellidae	Polychaete
Scatopsidae	Insect adult	Insect, Arachnid, Collembola
Sciaridae, adult	Insect adult	Insect, Arachnid, Collembola
Scolelepis sp.	Spionidae	Polychaete
Scoloplos sp.	Orbiniidae	Polychaete
Sminthuridae	Collembola	Insect, Arachnid, Collembola
Sphaeroceridae	Insect adult	Insect, Arachnid, Collembola
Sphaeromatidae, juv.	Aquatic Isopod	Aquatic crustacean
Spionidae	Spionidae	Polychaete
Spionidae, juv.	Spionidae	Polychaete
Staphylinidae	Insect adult	Insect, Arachnid, Collembola
Staphylinidae, larva	Insect larvae	Insect, Arachnid, Collembola
Sternorrhyncha	Insect adult	Insect, Arachnid, Collembola
Syllidae	Syllidae	Polychaete
Syllis elongata	Syllidae	Polychaete
Talitridae, juv.	Terrestrial Amphipod	Terrestrial amphipod/isopod
Thripidae, adult	Insect adult	Insect, Arachnid, Collembola
Tisbe sp	Harpacticoid	Aquatic crustacean
Traskorchestia georgiana	Terrestrial Amphipod	Terrestrial amphipod/isopod
Traskorchestia spp.	Terrestrial Amphipod	Terrestrial amphipod/isopod
Traskorchestia traskiana	Terrestrial Amphipod	Terrestrial amphipod/isopod
Turbellaria	Turbellaria	Nemertea/Turbellaria
Uromunna ubiquita	Aquatic Isopod	Aquatic crustacean
Valvifera, juv.	Aquatic Isopod	Aquatic crustacean
Zaus sp.	Harpacticoid	Aquatic crustacean
